# Supplementary material for: Anthocyanin improves kidney function in diabetic kidney disease by regulating amino acid metabolism
Source: J Transl Med. 2022 Nov 5;20:510. doi: 10.1186/s12967-022-03717-9 (PMC9636632; doi:10.1186/s12967-022-03717-9)
Supplement: Supplementary file 3 — Additional file 3: Table S2. The identified serum proteins in CT, DKD, and ANT groups. [file 12967_2022_3717_MOESM3_ESM.xlsx]

## Sheet: Sheet3
Table S2 The identified serum proteins in CT, DKD, and ANT groups
id	Accession	Description	CT_1	CT_2	CT_3	CT_4	CT_5	CT_6	DKD_1	DKD_2	DKD_3	DKD_4	DKD_5	DKD_6	ANT_1	ANT_2	ANT_3	ANT_4	ANT_5
A1bg	Q19LI2	Alpha-1B-glycoprotein OS=Mus musculus OX=10090 GN=A1bg PE=1 SV=1	1.09619e+06	1.68323e+06	1.64189e+06	1.31798e+07	2.07544e+06	1.41849e+06	9.79443e+07	8.92044e+07	2.36321e+07	3.86833e+09	2.65171e+08	1.65549e+08	2.51642e+07	2.28752e+09	1.09534e+07	1.26787e+08	6.07792e+07
A2m	Q6GQT1	Alpha-2-macroglobulin-P OS=Mus musculus OX=10090 GN=A2m PE=2 SV=2	381285	1.29053e+06	882021	758454	467214	716008	623497	10563.3	1.03153e+06	298376	444903	223768	10563.3	10563.3	10563.3	10563.3	10563.3
A4gnt	Q14BT6	Alpha-1,4-N-acetylglucosaminyltransferase OS=Mus musculus OX=10090 GN=A4gnt PE=2 SV=1	177570	10563.3	10563.3	10563.3	407988	10563.3	550809	528195	10563.3	10563.3	10563.3	10563.3	10563.3	10563.3	10563.3	10563.3	10563.3
Aars1	Q8BGQ7	Alanine--tRNA ligase, cytoplasmic OS=Mus musculus OX=10090 GN=Aars1 PE=1 SV=1	4.16873e+06	2.63527e+06	4.15695e+06	2.07202e+06	2.40992e+06	2.15378e+06	3.9052e+06	10563.3	550995	258543	323449	10563.3	1.10378e+06	759883	772374	954319	1.65247e+06
Abracl	Q4KML4	Costars family protein ABRACL OS=Mus musculus OX=10090 GN=Abracl PE=1 SV=1	788648	1.74977e+06	1.6146e+06	975731	957446	1.51313e+06	1.10793e+06	10563.3	844686	1.35329e+06	1.34374e+06	1.29565e+06	10563.3	10563.3	10563.3	10563.3	10563.3
Acaa1a	Q921H8	3-ketoacyl-CoA thiolase A, peroxisomal OS=Mus musculus OX=10090 GN=Acaa1a PE=1 SV=1	10563.3	10563.3	10563.3	10563.3	10563.3	10563.3	10563.3	10563.3	10563.3	10563.3	10563.3	10563.3	840010	855830	10563.3	1.27232e+06	4.20928e+06
Acaa1b	Q8VCH0	3-ketoacyl-CoA thiolase B, peroxisomal OS=Mus musculus OX=10090 GN=Acaa1b PE=1 SV=1	10563.3	10563.3	10563.3	10563.3	206313	10563.3	988973	3.29986e+06	10563.3	313747	6.91063e+06	236790	1.57783e+08	1.81028e+08	7.35019e+07	2.24185e+08	2.91449e+08
Acaa2	Q8BWT1	3-ketoacyl-CoA thiolase, mitochondrial OS=Mus musculus OX=10090 GN=Acaa2 PE=1 SV=3	242953	437048	10563.3	265647	850343	255933	10563.3	1.02919e+06	10563.3	3.75525e+06	1.78402e+06	10563.3	3.83305e+06	8.08557e+06	10563.3	5.49044e+06	8.41654e+06
Acadl	P51174	Long-chain specific acyl-CoA dehydrogenase, mitochondrial OS=Mus musculus OX=10090 GN=Acadl PE=1 SV=2	10563.3	10563.3	10563.3	10563.3	10563.3	10563.3	10563.3	10563.3	10563.3	10563.3	10563.3	10563.3	10563.3	340771	83102.5	679706	1.90032e+06
Acadm	P45952	Medium-chain specific acyl-CoA dehydrogenase, mitochondrial OS=Mus musculus OX=10090 GN=Acadm PE=1 SV=1	10563.3	10563.3	10563.3	10563.3	10563.3	10563.3	10563.3	10563.3	10563.3	10563.3	10563.3	10563.3	10563.3	10563.3	1.84754e+06	10563.3	10563.3
Acads	Q07417	Short-chain specific acyl-CoA dehydrogenase, mitochondrial OS=Mus musculus OX=10090 GN=Acads PE=1 SV=2	10563.3	10563.3	10563.3	10563.3	10563.3	10563.3	10563.3	10563.3	10563.3	507274	10563.3	10563.3	1.96605e+06	1.42118e+06	10563.3	1.07129e+06	1.55705e+06
Acat1	Q8QZT1	Acetyl-CoA acetyltransferase, mitochondrial OS=Mus musculus OX=10090 GN=Acat1 PE=1 SV=1	10563.3	10563.3	10563.3	832078	10563.3	10563.3	10563.3	183572	10563.3	440432	807661	10563.3	1.06252e+06	1.26501e+06	10563.3	1.32841e+06	1.88282e+06
Acat2	Q8CAY6	Acetyl-CoA acetyltransferase, cytosolic OS=Mus musculus OX=10090 GN=Acat2 PE=1 SV=2	564962	352108	554469	410148	641563	305486	10563.3	6.17322e+06	496631	5.61989e+06	5.44332e+06	521320	4.47788e+06	3.15771e+06	415709	2.48646e+06	4.3083e+06
Ache	P21836	Acetylcholinesterase OS=Mus musculus OX=10090 GN=Ache PE=1 SV=1	6.93934e+06	5.71737e+06	4.32791e+06	1.1861e+06	519605	2.29083e+06	1.56605e+06	1.18544e+06	1.99352e+06	2.04179e+06	1.52997e+06	1.36298e+06	4.27756e+06	2.30602e+06	3.53227e+06	4.00918e+06	4.35678e+06
Acly	Q91V92	ATP-citrate synthase OS=Mus musculus OX=10090 GN=Acly PE=1 SV=1	2.46973e+06	2.72252e+06	1.5843e+06	2.3517e+06	2.91473e+06	3.06095e+06	1.28936e+06	5.01853e+06	1.25609e+06	2.75792e+06	3.59296e+06	1.9945e+06	3.28515e+07	3.19376e+07	1.457e+07	2.67629e+07	5.07392e+07
Aco2	Q99KI0	Aconitate hydratase, mitochondrial OS=Mus musculus OX=10090 GN=Aco2 PE=1 SV=1	710039	4.40958e+06	490648	4.27127e+06	415751	383743	646234	10563.3	447385	651605	554087	1.29197e+06	10563.3	10563.3	10563.3	10563.3	10563.3
Acot4	Q8BWN8	Peroxisomal succinyl-coenzyme A thioesterase OS=Mus musculus OX=10090 GN=Acot4 PE=1 SV=1	10563.3	10563.3	10563.3	10563.3	10563.3	10563.3	10563.3	10563.3	10563.3	10563.3	10563.3	10563.3	2.49717e+06	4.32774e+06	10563.3	3.23156e+06	2.99125e+07
Acot7	Q91V12	Cytosolic acyl coenzyme A thioester hydrolase OS=Mus musculus OX=10090 GN=Acot7 PE=1 SV=2	10563.3	10563.3	10563.3	10563.3	10563.3	10563.3	10563.3	10563.3	10563.3	10563.3	10563.3	10563.3	337933	10563.3	10563.3	534715	455568
Acox1	Q9R0H0	Peroxisomal acyl-coenzyme A oxidase 1 OS=Mus musculus OX=10090 GN=Acox1 PE=1 SV=5	10563.3	10563.3	10563.3	10563.3	252251	228637	10563.3	777010	209471	518846	2.04911e+06	10563.3	8.52685e+07	7.50149e+07	6.07988e+06	1.23856e+08	1.98472e+08
Acox2	Q9QXD1	Peroxisomal acyl-coenzyme A oxidase 2 OS=Mus musculus OX=10090 GN=Acox2 PE=1 SV=2	10563.3	10563.3	10563.3	10563.3	10563.3	10563.3	10563.3	10563.3	10563.3	10563.3	10563.3	10563.3	1.07552e+07	1.14868e+07	4.86516e+06	1.49316e+07	3.21553e+07
Acp1	Q9D358	Low molecular weight phosphotyrosine protein phosphatase OS=Mus musculus OX=10090 GN=Acp1 PE=1 SV=3	2.49572e+06	5.47816e+06	3.04154e+06	2.84074e+06	9.79166e+06	356921	3.51752e+06	924853	1.29701e+06	2.53017e+06	7.04005e+06	1.52515e+06	914933	10563.3	10563.3	1.43386e+06	538117
Acp5	Q05117	Tartrate-resistant acid phosphatase type 5 OS=Mus musculus OX=10090 GN=Acp5 PE=1 SV=2	495225	563706	813004	682903	1.52056e+06	168777	1.43844e+06	2.10626e+06	1.94688e+06	1.73983e+06	756731	409100	685192	1.06979e+06	1.00516e+06	651818	10563.3
Acsl1	P41216	Long-chain-fatty-acid--CoA ligase 1 OS=Mus musculus OX=10090 GN=Acsl1 PE=1 SV=2	10563.3	10563.3	10563.3	10563.3	10563.3	10563.3	10563.3	10563.3	10563.3	10563.3	10563.3	10563.3	3.91181e+07	7.59115e+07	5.55779e+07	6.92293e+07	6.29904e+07
Acta1	P68134	Actin, alpha skeletal muscle OS=Mus musculus OX=10090 GN=Acta1 PE=1 SV=1	3.05606e+06	2.10068e+06	2.74182e+06	4.24447e+06	8.0376e+06	7.85417e+06	10563.3	1.01672e+06	10563.3	10563.3	10563.3	10563.3	1.56858e+08	1.30242e+08	1.2559e+08	1.35232e+08	2.00178e+08
Acta2	P62737	Actin, aortic smooth muscle OS=Mus musculus OX=10090 GN=Acta2 PE=1 SV=1	1.57473e+08	3.01002e+08	1.99918e+08	2.7759e+08	2.27336e+08	2.4323e+08	7.04988e+07	8.12675e+07	1.36411e+08	9.77485e+07	1.60162e+08	6.95394e+07	10563.3	10563.3	10563.3	10563.3	10563.3
Actb	P60710	Actin, cytoplasmic 1 OS=Mus musculus OX=10090 GN=Actb PE=1 SV=1	10563.3	10563.3	10563.3	10563.3	10563.3	10563.3	10563.3	10563.3	10563.3	10563.3	10563.3	10563.3	3.13662e+09	2.93572e+09	1.91746e+09	3.38616e+09	4.62773e+09
Actbl2	Q8BFZ3	Beta-actin-like protein 2 OS=Mus musculus OX=10090 GN=Actbl2 PE=1 SV=1	2.25037e+06	4.95771e+06	4.87528e+06	2.79175e+06	4.22202e+06	3.94949e+06	1.39308e+06	10563.3	1.49477e+06	1.75809e+06	6.32037e+06	899202	796114	754592	905512	1.00627e+06	1.41475e+06
Actg1	P63260	Actin, cytoplasmic 2 OS=Mus musculus OX=10090 GN=Actg1 PE=1 SV=1	2.27931e+09	3.4181e+09	3.02495e+09	3.38011e+09	2.81469e+09	2.97074e+09	1.90194e+09	2.61368e+09	2.34255e+09	2.19205e+09	3.23378e+09	1.40139e+09	10563.3	10563.3	10563.3	10563.3	10563.3
Actn1	Q7TPR4	Alpha-actinin-1 OS=Mus musculus OX=10090 GN=Actn1 PE=1 SV=1	4.59062e+07	1.18674e+08	1.74331e+08	1.45826e+08	6.87335e+07	8.24662e+07	6.91841e+07	2.08294e+07	5.72178e+07	7.25887e+07	1.32532e+08	5.56206e+07	2.9588e+07	1.51876e+07	1.49184e+07	3.3155e+07	1.14947e+08
Actn4	P57780	Alpha-actinin-4 OS=Mus musculus OX=10090 GN=Actn4 PE=1 SV=1	8.36899e+06	1.39705e+07	2.21808e+07	2.36852e+07	9.00156e+06	5.83399e+06	1.27477e+07	7.48219e+06	1.38872e+07	1.41822e+07	2.03576e+07	3.42023e+06	2.44796e+06	1.34096e+06	5.7362e+06	6.55306e+06	1.12263e+07
Actr1a	P61164	Alpha-centractin OS=Mus musculus OX=10090 GN=Actr1a PE=1 SV=1	4.24255e+06	8.92606e+06	5.04569e+06	5.32742e+06	5.20757e+06	4.35238e+06	3.82856e+06	206050	8.01212e+06	3.16441e+06	4.43804e+06	6.1369e+06	390857	10563.3	10563.3	742575	830168
Actr2	P61161	Actin-related protein 2 OS=Mus musculus OX=10090 GN=Actr2 PE=1 SV=1	527238	871444	1.0844e+06	1.88065e+06	599613	671534	276587	10563.3	524373	221225	1.04726e+06	10563.3	10563.3	10563.3	10563.3	10563.3	10563.3
Actr3	Q99JY9	Actin-related protein 3 OS=Mus musculus OX=10090 GN=Actr3 PE=1 SV=3	863365	1.35824e+06	2.19718e+06	2.47033e+06	1.42186e+06	1.16566e+06	10563.3	10563.3	1.2263e+06	258082	738013	616251	954095	717080	761677	1.03122e+06	1.39858e+06
Actr5	Q80US4	Actin-related protein 5 OS=Mus musculus OX=10090 GN=Actr5 PE=1 SV=3	6.46543e+06	8.77287e+06	1.08029e+07	1.17495e+07	8.8583e+06	1.07927e+07	7.04454e+06	2.19421e+06	4.24397e+06	8.17277e+06	1.12061e+07	8.12931e+06	10563.3	10563.3	10563.3	10563.3	10563.3
Adam10	O35598	Disintegrin and metalloproteinase domain-containing protein 10 OS=Mus musculus OX=10090 GN=Adam10 PE=1 SV=2	539794	670992	440612	10563.3	460664	10563.3	594543	360157	10563.3	10563.3	10563.3	10563.3	703720	10563.3	550181	718931	1.90865e+06
Adamts13	Q769J6	A disintegrin and metalloproteinase with thrombospondin motifs 13 OS=Mus musculus OX=10090 GN=Adamts13 PE=1 SV=1	5.48641e+06	8.44407e+06	7.25915e+06	6.78178e+06	7.33648e+06	9.18666e+06	3.81408e+06	3.38087e+06	2.25018e+06	9.94554e+06	5.39345e+06	4.94902e+06	1.38215e+06	3.10765e+06	491177	2.65437e+06	3.25217e+06
Adamts19	P59509	A disintegrin and metalloproteinase with thrombospondin motifs 19 OS=Mus musculus OX=10090 GN=Adamts19 PE=2 SV=1	10563.3	10563.3	10563.3	10563.3	10563.3	10563.3	10563.3	10563.3	10563.3	10563.3	10563.3	10563.3	715693	799484	352333	772188	2.17684e+06
Adamts2	Q8C9W3	A disintegrin and metalloproteinase with thrombospondin motifs 2 OS=Mus musculus OX=10090 GN=Adamts2 PE=1 SV=2	10563.3	10563.3	10563.3	10563.3	10563.3	10563.3	10563.3	10563.3	10563.3	10563.3	10563.3	10563.3	405505	10563.3	303990	10563.3	318542
Adamtsl2	Q7TSK7	ADAMTS-like protein 2 OS=Mus musculus OX=10090 GN=Adamtsl2 PE=1 SV=1	10563.3	10563.3	539420	518360	476145	590421	10563.3	10563.3	359304	10563.3	10563.3	10563.3	10563.3	10563.3	10563.3	10563.3	10563.3
Adamtsl4	Q80T21	ADAMTS-like protein 4 OS=Mus musculus OX=10090 GN=Adamtsl4 PE=2 SV=1	2.45224e+06	4.04477e+06	3.51375e+06	1.69312e+06	3.07562e+06	3.8653e+06	2.02625e+06	716692	6.53084e+06	5.23417e+06	2.37022e+06	2.86615e+06	503957	741725	10563.3	739775	716324
Add1	Q9QYC0	Alpha-adducin OS=Mus musculus OX=10090 GN=Add1 PE=1 SV=2	1.46749e+06	2.05349e+06	1.01437e+06	1.86386e+06	2.47042e+06	865656	725778	845249	10563.3	542307	1.74352e+06	10563.3	10563.3	10563.3	10563.3	10563.3	10563.3
Add2	Q9QYB8	Beta-adducin OS=Mus musculus OX=10090 GN=Add2 PE=1 SV=4	2.23558e+06	2.8045e+06	4.30459e+06	4.05916e+06	4.58625e+06	5.66688e+06	3.03239e+06	1.28849e+06	4.21569e+06	6.29897e+06	5.7288e+06	5.22497e+06	10563.3	10563.3	10563.3	10563.3	10563.3
Add3	Q9QYB5	Gamma-adducin OS=Mus musculus OX=10090 GN=Add3 PE=1 SV=2	5.44885e+06	1.54718e+06	903448	844531	682078	5.5929e+06	627718	367927	488319	674606	2.11113e+06	577055	1.85112e+06	10563.3	934211	597377	1.86472e+06
Adgre5	Q9Z0M6	Adhesion G protein-coupled receptor E5 OS=Mus musculus OX=10090 GN=Adgre5 PE=1 SV=2	2.71179e+07	3.25837e+07	3.54556e+07	3.30353e+07	3.16051e+07	4.74039e+07	2.41804e+07	1.8269e+07	3.04485e+07	4.63036e+07	3.74157e+07	3.29946e+07	1.28788e+07	1.47788e+07	1.64769e+07	1.46603e+07	1.36244e+07
Adgrf5	G5E8Q8	Adhesion G protein-coupled receptor F5 OS=Mus musculus OX=10090 GN=Adgrf5 PE=1 SV=1	1.2832e+06	1.27296e+06	906967	1.39118e+06	1.13105e+06	1.04702e+06	1.43467e+06	1.27716e+06	1.54836e+06	10563.3	1.65114e+06	1.08233e+06	1.28312e+06	2.18577e+06	2.33337e+06	736639	1.07933e+06
Adgrl4	Q923X1	Adhesion G protein-coupled receptor L4 OS=Mus musculus OX=10090 GN=Adgrl4 PE=2 SV=3	1.25752e+06	1.25831e+06	442345	997643	10563.3	6.50686e+06	740921	10563.3	1.13762e+06	370465	167726	276232	10563.3	10563.3	10563.3	10563.3	10563.3
Adh1	P00329	Alcohol dehydrogenase 1 OS=Mus musculus OX=10090 GN=Adh1 PE=1 SV=2	1.84219e+07	1.74236e+07	5.48357e+06	1.02857e+07	2.10001e+07	1.22988e+07	1.55299e+07	6.79415e+07	2.73904e+07	6.93834e+07	1.32222e+08	1.30743e+07	1.22528e+08	3.85744e+08	4.83386e+07	1.36906e+08	2.12122e+08
Adh5	P28474	Alcohol dehydrogenase class-3 OS=Mus musculus OX=10090 GN=Adh5 PE=1 SV=3	571729	1.3705e+06	1.37074e+06	936501	656226	1.11947e+06	1.06533e+06	290870	1.02111e+06	1.60354e+06	1.5639e+06	243762	342340	241095	10563.3	442391	338716
Adipoq	Q60994	Adiponectin OS=Mus musculus OX=10090 GN=Adipoq PE=1 SV=2	4.88744e+08	5.84615e+08	6.47322e+08	6.47289e+08	8.25923e+08	4.97297e+08	9.80047e+07	1.30265e+08	5.84114e+07	6.71086e+08	2.36386e+08	2.10923e+08	3.40426e+08	4.6364e+08	5.00132e+08	3.60679e+08	1.35751e+08
Adk	P55264	Adenosine kinase OS=Mus musculus OX=10090 GN=Adk PE=1 SV=2	368086	1.5501e+06	286169	403190	1.2264e+06	234419	158138	10563.3	10563.3	1.34169e+06	1.56132e+06	179245	781320	561760	3.81487e+06	2.14618e+06	4.33489e+06
Adprh	P54923	[Protein ADP-ribosylarginine] hydrolase OS=Mus musculus OX=10090 GN=Adprh PE=1 SV=1	10563.3	344877	371063	369197	10563.3	10563.3	491551	602757	466843	10563.3	602296	10563.3	1.3691e+06	303426	891898	1.31418e+06	2.13689e+06
Adsl	P54822	Adenylosuccinate lyase OS=Mus musculus OX=10090 GN=Adsl PE=1 SV=2	1.28811e+07	1.96391e+07	1.95416e+07	1.74449e+07	2.6961e+07	1.87215e+07	1.34168e+07	1.24715e+07	1.08278e+07	1.24873e+07	1.58247e+07	1.11779e+07	2.39471e+07	2.3305e+07	1.85555e+07	2.25547e+07	2.1885e+07
Afm	O89020	Afamin OS=Mus musculus OX=10090 GN=Afm PE=1 SV=2	2.45666e+08	1.16875e+08	1.75907e+08	1.46205e+08	1.95833e+08	1.09067e+08	1.12585e+08	8.24897e+07	1.109e+08	1.55659e+08	1.91445e+08	1.57578e+08	4.8017e+07	8.45673e+07	1.1716e+08	5.56986e+07	3.65108e+07
Agr2	O88312	Anterior gradient protein 2 homolog OS=Mus musculus OX=10090 GN=Agr2 PE=1 SV=1	10563.3	10563.3	10563.3	564324	10563.3	224962	10563.3	10563.3	10563.3	263988	764006	10563.3	10563.3	10563.3	10563.3	10563.3	10563.3
Agt	P11859	Angiotensinogen OS=Mus musculus OX=10090 GN=Agt PE=1 SV=1	1.6687e+07	1.42752e+07	1.60025e+07	1.27943e+07	9.58412e+06	1.33724e+07	4.9884e+07	1.00609e+07	3.6803e+07	1.30186e+07	2.72944e+07	3.61038e+07	2.41568e+07	4.66122e+07	1.46981e+08	1.48189e+07	7.216e+06
Agxt	O35423	Serine--pyruvate aminotransferase, mitochondrial OS=Mus musculus OX=10090 GN=Agxt PE=1 SV=3	10563.3	10563.3	10563.3	10563.3	10563.3	10563.3	10563.3	10563.3	10563.3	594111	10563.3	10563.3	10563.3	10563.3	10563.3	10563.3	10563.3
Ahcy	P50247	Adenosylhomocysteinase OS=Mus musculus OX=10090 GN=Ahcy PE=1 SV=3	8.4585e+06	1.11254e+07	1.18067e+07	1.40905e+07	1.44684e+07	8.75776e+06	2.43478e+07	7.47205e+07	3.10455e+07	1.1559e+08	6.94072e+07	3.48281e+07	5.51081e+07	1.24515e+08	1.71694e+07	5.24433e+07	7.92521e+07
Ahcyl1	Q80SW1	S-adenosylhomocysteine hydrolase-like protein 1 OS=Mus musculus OX=10090 GN=Ahcyl1 PE=1 SV=1	10563.3	10563.3	10563.3	10563.3	10563.3	10563.3	10563.3	2.25159e+06	10563.3	10563.3	10563.3	10563.3	10563.3	10563.3	10563.3	10563.3	10563.3
Ahsa1	Q8BK64	Activator of 90 kDa heat shock protein ATPase homolog 1 OS=Mus musculus OX=10090 GN=Ahsa1 PE=1 SV=2	10563.3	1.51463e+06	666735	2.23568e+06	1.6733e+06	766514	2.94999e+06	3.45467e+06	3.83401e+06	1.81668e+06	3.20497e+06	647108	10563.3	10563.3	10563.3	10563.3	10563.3
Ahsg	P29699	Alpha-2-HS-glycoprotein OS=Mus musculus OX=10090 GN=Ahsg PE=1 SV=1	1.81207e+09	1.26732e+09	1.57332e+09	2.0269e+09	1.6575e+09	1.77994e+09	1.09749e+09	4.82633e+08	1.78246e+09	1.22287e+09	1.64758e+09	1.56331e+09	5.69897e+08	6.10977e+08	8.33862e+08	5.95546e+08	4.63716e+08
Aifm1	Q9Z0X1	Apoptosis-inducing factor 1, mitochondrial OS=Mus musculus OX=10090 GN=Aifm1 PE=1 SV=1	10563.3	10563.3	10563.3	10563.3	10563.3	10563.3	10563.3	10563.3	10563.3	10563.3	10563.3	10563.3	10563.3	10563.3	1.52657e+06	10563.3	367267
Ak1	Q9R0Y5	Adenylate kinase isoenzyme 1 OS=Mus musculus OX=10090 GN=Ak1 PE=1 SV=1	1.51737e+07	1.46942e+07	1.14652e+07	1.86502e+07	1.63664e+07	9.12129e+06	7.52451e+06	1.35467e+07	1.02535e+07	1.59489e+07	1.8497e+07	8.84816e+06	1.13274e+07	1.08139e+06	3.42814e+06	7.90144e+06	8.82656e+06
Akap12	Q9WTQ5	A-kinase anchor protein 12 OS=Mus musculus OX=10090 GN=Akap12 PE=1 SV=1	828771	2.58286e+06	4.51374e+06	599846	162215	10563.3	10563.3	7.88089e+06	4.78046e+06	4.60447e+06	473924	10563.3	10563.3	10563.3	10563.3	10563.3	10563.3
Akr1b1	P45376	Aldo-keto reductase family 1 member B1 OS=Mus musculus OX=10090 GN=Akr1b1 PE=1 SV=3	873554	765793	727141	625592	1.04513e+06	673985	212296	975733	10563.3	1.17129e+06	1.77309e+06	10563.3	624150	10563.3	6.27915e+06	1.43662e+06	2.18134e+06
Akr1b7	P21300	Aldo-keto reductase family 1 member B7 OS=Mus musculus OX=10090 GN=Akr1b7 PE=1 SV=4	463608	10563.3	10563.3	10563.3	337637	10563.3	1.29913e+06	10563.3	1.05929e+06	510244	10563.3	10563.3	10563.3	10563.3	10563.3	10563.3	10563.3
Akr1b8	P45377	Aldose reductase-related protein 2 OS=Mus musculus OX=10090 GN=Akr1b8 PE=1 SV=2	10563.3	10563.3	10563.3	10563.3	10563.3	10563.3	10563.3	10563.3	10563.3	10563.3	293071	10563.3	10563.3	10563.3	10563.3	10563.3	10563.3
Akr1c6	P70694	Estradiol 17 beta-dehydrogenase 5 OS=Mus musculus OX=10090 GN=Akr1c6 PE=1 SV=1	10563.3	10563.3	10563.3	10563.3	10563.3	10563.3	10563.3	10563.3	10563.3	10563.3	10563.3	10563.3	799533	2.94886e+06	7.57201e+06	8.13241e+06	1.00749e+07
Akr1d1	Q8VCX1	Aldo-keto reductase family 1 member D1 OS=Mus musculus OX=10090 GN=Akr1d1 PE=1 SV=1	10563.3	10563.3	10563.3	10563.3	10563.3	10563.3	10563.3	10563.3	10563.3	10563.3	10563.3	10563.3	10563.3	10563.3	1.59344e+06	316878	328270
Alad	P10518	Delta-aminolevulinic acid dehydratase OS=Mus musculus OX=10090 GN=Alad PE=1 SV=1	5.03875e+06	6.28861e+06	6.46195e+06	7.73626e+06	1.33141e+07	7.81337e+06	2.26681e+06	7.70253e+06	2.49295e+06	4.92428e+06	5.41961e+06	605938	3.48685e+06	9.36156e+06	3.28486e+06	2.3695e+06	1.72857e+07
Alb	P07724	Albumin OS=Mus musculus OX=10090 GN=Alb PE=1 SV=3	1.82239e+10	1.5524e+10	1.61966e+10	1.3557e+10	1.6045e+10	1.50383e+10	3.72415e+10	1.25459e+10	3.98222e+10	1.90339e+10	2.2175e+10	3.432e+10	1.05501e+10	1.63884e+10	4.40164e+10	1.34388e+10	7.74338e+09
Aldh16a1	Q571I9	Aldehyde dehydrogenase family 16 member A1 OS=Mus musculus OX=10090 GN=Aldh16a1 PE=1 SV=2	10563.3	10563.3	176419	10563.3	231610	10563.3	10563.3	10563.3	10563.3	10563.3	10563.3	10563.3	10563.3	10563.3	10563.3	10563.3	10563.3
Aldh1a1	P24549	Retinal dehydrogenase 1 OS=Mus musculus OX=10090 GN=Aldh1a1 PE=1 SV=5	1.20259e+07	1.97878e+07	1.39486e+07	1.25433e+07	3.19339e+07	4.78778e+06	1.4542e+07	6.40365e+07	1.64722e+07	2.30029e+07	5.36898e+07	7.36986e+06	4.64036e+07	8.23117e+07	2.29009e+07	6.52958e+07	1.27854e+08
Aldh1a7	O35945	Aldehyde dehydrogenase, cytosolic 1 OS=Mus musculus OX=10090 GN=Aldh1a7 PE=1 SV=1	10563.3	467481	562819	10563.3	1.08184e+06	305687	348229	1.34007e+06	295110	336599	604255	253292	1.65888e+06	5.59507e+06	711332	3.76299e+06	3.60467e+06
Aldh1l1	Q8R0Y6	Cytosolic 10-formyltetrahydrofolate dehydrogenase OS=Mus musculus OX=10090 GN=Aldh1l1 PE=1 SV=1	3.09668e+06	4.08359e+06	1.77695e+06	3.72196e+06	2.02049e+06	898709	4.63774e+06	4.22997e+07	1.03232e+07	4.32628e+07	2.02332e+07	6.39339e+06	4.14231e+07	1.36372e+08	4.9523e+07	4.21533e+07	8.04852e+07
Aldh2	P47738	Aldehyde dehydrogenase, mitochondrial OS=Mus musculus OX=10090 GN=Aldh2 PE=1 SV=1	803125	938628	4.6629e+06	6.88336e+06	1.34008e+06	2.24269e+06	1.58664e+06	993973	2.622e+06	5.51097e+06	1.33734e+07	608458	1.60505e+06	2.91451e+06	1.45846e+06	1.55192e+06	976661
Aldh3a1	P47739	Aldehyde dehydrogenase, dimeric NADP-preferring OS=Mus musculus OX=10090 GN=Aldh3a1 PE=1 SV=2	10563.3	10563.3	10563.3	10563.3	10563.3	10563.3	10563.3	10563.3	10563.3	10563.3	10563.3	10563.3	10563.3	1.0754e+06	10563.3	10563.3	10563.3
Aldh4a1	Q8CHT0	Delta-1-pyrroline-5-carboxylate dehydrogenase, mitochondrial OS=Mus musculus OX=10090 GN=Aldh4a1 PE=1 SV=3	10563.3	10563.3	10563.3	10563.3	10563.3	10563.3	10563.3	10563.3	10563.3	10563.3	10563.3	10563.3	31125.8	10563.3	1.19996e+06	10563.3	10563.3
Aldh6a1	Q9EQ20	Methylmalonate-semialdehyde dehydrogenase [acylating], mitochondrial OS=Mus musculus OX=10090 GN=Aldh6a1 PE=1 SV=1	10563.3	10563.3	10563.3	10563.3	10563.3	10563.3	10563.3	10563.3	10563.3	10563.3	10563.3	10563.3	10563.3	10563.3	2.60273e+06	10563.3	10563.3
Aldh7a1	Q9DBF1	Alpha-aminoadipic semialdehyde dehydrogenase OS=Mus musculus OX=10090 GN=Aldh7a1 PE=1 SV=4	1.0707e+06	2.397e+06	6.0562e+06	5.56522e+06	4.04905e+06	3.41566e+06	3.63992e+06	1.43532e+07	2.31441e+06	1.49353e+07	1.06623e+07	1.15329e+06	2.63606e+07	5.57992e+07	1.22253e+07	4.24085e+07	7.12263e+07
Aldh8a1	Q8BH00	2-aminomuconic semialdehyde dehydrogenase OS=Mus musculus OX=10090 GN=Aldh8a1 PE=1 SV=1	10563.3	10563.3	10563.3	10563.3	10563.3	10563.3	10563.3	10563.3	10563.3	10563.3	10563.3	10563.3	9.30054e+06	8.27813e+06	4.11112e+06	1.34144e+07	1.87586e+07
Aldh9a1	Q9JLJ2	4-trimethylaminobutyraldehyde dehydrogenase OS=Mus musculus OX=10090 GN=Aldh9a1 PE=1 SV=1	3.111e+08	3.11689e+08	3.44954e+08	6.15087e+08	5.02262e+08	5.04132e+08	3.51701e+08	4.27347e+08	3.4163e+08	3.49989e+08	3.59205e+08	3.91682e+08	1.92077e+07	2.27848e+07	5.71017e+06	2.70874e+07	4.1114e+07
Aldoa	P05064	Fructose-bisphosphate aldolase A OS=Mus musculus OX=10090 GN=Aldoa PE=1 SV=2	2.46783e+07	1.18784e+07	4.20289e+07	6.85397e+07	3.23685e+07	7.28377e+07	1.08876e+07	8.26002e+06	6.47199e+06	1.09331e+07	4.55684e+06	5.3691e+06	2.57674e+06	375793	2.4858e+06	4.41681e+06	4.00597e+06
Aldob	Q91Y97	Fructose-bisphosphate aldolase B OS=Mus musculus OX=10090 GN=Aldob PE=1 SV=3	10563.3	10563.3	1.92047e+06	333400	10563.3	2.46282e+06	4.56606e+06	1.49236e+07	4.606e+06	8.47531e+06	1.64014e+07	3.26022e+06	4.29313e+07	4.86347e+07	3.44414e+07	6.16587e+07	5.81231e+07
Aldoc	P05063	Fructose-bisphosphate aldolase C OS=Mus musculus OX=10090 GN=Aldoc PE=1 SV=4	429369	879823	10563.3	2.10675e+06	392070	334187	630585	10563.3	1.51778e+06	1.48179e+06	489313	862526	10563.3	10563.3	10563.3	10563.3	10563.3
Alox12	P39655	Polyunsaturated fatty acid lipoxygenase ALOX12 OS=Mus musculus OX=10090 GN=Alox12 PE=1 SV=4	1.23933e+07	4.0821e+07	7.35055e+07	6.43246e+07	1.11041e+07	3.34203e+07	6.95613e+07	3.90696e+06	3.67574e+07	4.99969e+07	5.69935e+07	1.63268e+07	5.68364e+06	4.42547e+06	2.15917e+06	7.02435e+06	9.90786e+06
Ambp	Q07456	Protein AMBP OS=Mus musculus OX=10090 GN=Ambp PE=1 SV=2	1.1736e+08	1.01951e+08	1.33563e+08	1.46673e+08	1.88657e+08	1.19941e+08	1.48635e+08	5.93781e+07	1.20758e+08	3.17889e+08	1.24333e+08	1.02336e+08	7.97322e+07	6.69075e+07	7.69469e+07	6.81374e+07	7.99e+07
Amt	Q8CFA2	Aminomethyltransferase, mitochondrial OS=Mus musculus OX=10090 GN=Amt PE=1 SV=1	1.23044e+06	475480	1.08195e+06	873715	1.23918e+06	1.09345e+06	836435	2.23998e+06	775211	505059	1.02476e+06	433412	10563.3	10563.3	10563.3	10563.3	10563.3
Amy1	P00687	Alpha-amylase 1 OS=Mus musculus OX=10090 GN=Amy1 PE=1 SV=2	2.60977e+07	3.92417e+07	2.05278e+07	6.32459e+06	3.06388e+06	9.01105e+07	5.30392e+07	4.86216e+07	9.21415e+07	2.25085e+07	8.18849e+07	5.97473e+07	8.17728e+07	4.87281e+07	1.23667e+08	6.60666e+07	6.30746e+07
Amy2	P00688	Pancreatic alpha-amylase OS=Mus musculus OX=10090 GN=Amy2 PE=1 SV=2	10563.3	10563.3	10563.3	10563.3	10563.3	10563.3	1.24383e+06	10563.3	10563.3	10563.3	10563.3	10563.3	10563.3	10563.3	10563.3	10563.3	10563.3
Ang	P21570	Angiogenin OS=Mus musculus OX=10090 GN=Ang PE=1 SV=1	4.70535e+06	8.75518e+06	7.54599e+06	7.09084e+06	3.84533e+06	9.14467e+06	2.13712e+07	3.42176e+06	1.61014e+07	1.01394e+07	4.94265e+06	4.05209e+06	1.98401e+06	1.44116e+06	4.02406e+06	2.00358e+06	1.86311e+06
Angpt1	O08538	Angiopoietin-1 OS=Mus musculus OX=10090 GN=Angpt1 PE=1 SV=2	1.03424e+08	1.38726e+08	5.45833e+07	2.32642e+07	3.84216e+07	2.48203e+07	7.29598e+07	4.1461e+07	1.14648e+07	3.18877e+07	8.84058e+06	1.17379e+07	5.08606e+07	1.35029e+06	9.6751e+06	4.75279e+07	1.4152e+08
Angptl3	Q9R182	Angiopoietin-related protein 3 OS=Mus musculus OX=10090 GN=Angptl3 PE=1 SV=1	3.44378e+07	2.20258e+07	3.22554e+07	4.52119e+07	3.73272e+07	2.92817e+07	6.77002e+07	8.23134e+07	7.84548e+07	1.14868e+08	7.74052e+07	6.79753e+07	1.02703e+08	5.91761e+07	6.37195e+07	1.0563e+08	8.72523e+07
Angptl4	Q9Z1P8	Angiopoietin-related protein 4 OS=Mus musculus OX=10090 GN=Angptl4 PE=1 SV=1	10563.3	10563.3	10563.3	10563.3	10563.3	10563.3	10563.3	10563.3	10563.3	10563.3	10563.3	10563.3	846480	582052	1.18323e+06	683116	687606
Angptl6	Q8R0Z6	Angiopoietin-related protein 6 OS=Mus musculus OX=10090 GN=Angptl6 PE=2 SV=1	6.38971e+06	5.45794e+06	9.45392e+06	4.81197e+06	6.4764e+06	8.53004e+06	5.96102e+06	9.90501e+06	5.40866e+06	7.44058e+06	1.06271e+07	7.40296e+06	4.27496e+07	4.78267e+07	2.23865e+07	4.48569e+07	2.53381e+07
Angptl8	Q8R1L8	Angiopoietin-like protein 8 OS=Mus musculus OX=10090 GN=Angptl8 PE=2 SV=2	5.37896e+06	7.74966e+06	7.18368e+06	3.92468e+06	2.44488e+06	2.50483e+06	608990	1.46398e+06	1.89394e+06	936110	315473	452476	4.09765e+06	1.07806e+06	10563.3	2.39863e+06	1.82344e+06
Ank1	Q02357	Ankyrin-1 OS=Mus musculus OX=10090 GN=Ank1 PE=1 SV=2	10563.3	873947	2.03883e+06	337907	8.96876e+06	10563.3	10563.3	10563.3	10563.3	10563.3	239913	10563.3	1.16807e+06	1.87745e+06	1.49551e+06	2.07556e+06	395823
Anpep	P97449	Aminopeptidase N OS=Mus musculus OX=10090 GN=Anpep PE=1 SV=4	10563.3	223900	10563.3	221734	10563.3	189471	10563.3	10563.3	734767	261622	207313	10563.3	254771	10563.3	401112	433677	310023
Antxr1	Q9CZ52	Anthrax toxin receptor 1 OS=Mus musculus OX=10090 GN=Antxr1 PE=1 SV=2	572357	1.11047e+06	998843	830504	1.47809e+06	1.71521e+06	280410	1.15961e+06	10563.3	682709	1.36837e+06	752287	445626	10563.3	10563.3	489403	257550
Antxr2	Q6DFX2	Anthrax toxin receptor 2 OS=Mus musculus OX=10090 GN=Antxr2 PE=1 SV=1	1.30157e+08	2.95943e+08	2.29365e+08	1.69562e+08	1.8395e+08	2.29633e+08	2.66207e+08	3.42691e+08	1.43855e+08	1.93438e+08	3.25994e+08	2.21538e+08	2.38009e+06	5.80251e+06	2.27253e+06	2.89773e+06	2.35364e+06
Anxa1	P10107	Annexin A1 OS=Mus musculus OX=10090 GN=Anxa1 PE=1 SV=2	10563.3	10563.3	10563.3	10563.3	10563.3	10563.3	397528	10563.3	607650	10563.3	10563.3	10563.3	10563.3	10563.3	10563.3	10563.3	10563.3
Anxa2	P07356	Annexin A2 OS=Mus musculus OX=10090 GN=Anxa2 PE=1 SV=2	971366	10563.3	767354	1.28273e+06	741866	325134	1.34368e+06	10563.3	427850	362748	1.14787e+06	658330	10563.3	10563.3	10563.3	10563.3	10563.3
Anxa5	P48036	Annexin A5 OS=Mus musculus OX=10090 GN=Anxa5 PE=1 SV=1	558239	407966	655711	1.88061e+06	10563.3	156453	674890	10563.3	430456	360527	1.69469e+06	148529	8.66496e+07	5.6046e+08	4.23815e+07	2.6896e+08	9.47411e+07
Aox1	O54754	Aldehyde oxidase 1 OS=Mus musculus OX=10090 GN=Aox1 PE=1 SV=2	10563.3	10563.3	10563.3	10563.3	10563.3	10563.3	10563.3	372306	10563.3	10563.3	246513	10563.3	2.76087e+06	4.49113e+06	10563.3	1.66157e+07	1.06947e+07
Ap1b1	O35643	AP-1 complex subunit beta-1 OS=Mus musculus OX=10090 GN=Ap1b1 PE=1 SV=2	1.48651e+06	2.39226e+06	1.98243e+06	2.41376e+06	2.08896e+06	1.20153e+06	10563.3	1.03062e+06	746751	1.57146e+06	2.34331e+06	10563.3	3.42006e+06	3.5132e+06	1.24848e+06	1.09422e+08	6.13648e+06
Ap1g1	P22892	AP-1 complex subunit gamma-1 OS=Mus musculus OX=10090 GN=Ap1g1 PE=1 SV=3	308809	585394	687960	435228	369015	483842	245748	10563.3	347005	323169	461609	10563.3	583816	355635	10563.3	317618	2.02274e+06
Ap1g2	O88512	AP-1 complex subunit gamma-like 2 OS=Mus musculus OX=10090 GN=Ap1g2 PE=1 SV=2	10563.3	10563.3	10563.3	10563.3	10563.3	10563.3	10563.3	10563.3	10563.3	10563.3	10563.3	10563.3	2.53638e+06	2.47049e+06	1.02027e+06	3.3109e+06	2.8181e+06
Ap1m1	P35585	AP-1 complex subunit mu-1 OS=Mus musculus OX=10090 GN=Ap1m1 PE=1 SV=3	307220	1.26572e+06	1.65192e+06	1.07226e+06	544030	941411	570255	747257	334282	839820	1.66156e+06	235958	10563.3	374049	268195	636244	730046
Ap1s1	P61967	AP-1 complex subunit sigma-1A OS=Mus musculus OX=10090 GN=Ap1s1 PE=1 SV=1	10563.3	127185	10563.3	254974	10563.3	10563.3	10563.3	10563.3	10563.3	10563.3	238958	10563.3	689155	10563.3	10563.3	695615	1.07939e+06
Ap2a1	P17426	AP-2 complex subunit alpha-1 OS=Mus musculus OX=10090 GN=Ap2a1 PE=1 SV=1	264057	788000	522245	528585	424257	311039	345664	10563.3	1.15753e+06	817497	10563.3	10563.3	10563.3	10563.3	10563.3	10563.3	10563.3
Ap2a2	P17427	AP-2 complex subunit alpha-2 OS=Mus musculus OX=10090 GN=Ap2a2 PE=1 SV=2	146066	1.01469e+06	1.62119e+06	3.73707e+06	149519	477665	2.12025e+06	523182	2.56098e+06	1.58327e+06	3.15508e+06	10563.3	197663	173245	10563.3	304957	658703
Ap2b1	Q9DBG3	AP-2 complex subunit beta OS=Mus musculus OX=10090 GN=Ap2b1 PE=1 SV=1	9.9854e+06	6.99852e+06	5.93977e+06	1.24017e+07	5.88439e+06	7.85617e+06	1.30345e+07	1.35147e+06	2.22303e+07	5.05605e+06	6.88299e+06	4.52866e+06	10563.3	10563.3	10563.3	227462	399756
Ap2m1	P84091	AP-2 complex subunit mu OS=Mus musculus OX=10090 GN=Ap2m1 PE=1 SV=1	10563.3	1.0918e+06	508599	2.53009e+06	564554	10563.3	626694	10563.3	750783	668082	823006	10563.3	10563.3	10563.3	10563.3	10563.3	10563.3
Ap2s1	P62743	AP-2 complex subunit sigma OS=Mus musculus OX=10090 GN=Ap2s1 PE=1 SV=1	10563.3	10563.3	10563.3	10563.3	10563.3	10563.3	10563.3	10563.3	10563.3	10563.3	10563.3	10563.3	10563.3	10563.3	10563.3	10563.3	580300
Apcs	P12246	Serum amyloid P-component OS=Mus musculus OX=10090 GN=Apcs PE=1 SV=2	1.17593e+07	1.48014e+07	1.34023e+07	4.26954e+08	2.94781e+08	3.45339e+07	1.2479e+08	4.33488e+07	4.74475e+08	6.22726e+07	1.96454e+07	2.62942e+07	3.77755e+07	3.04999e+07	1.22565e+08	5.75267e+07	1.77821e+07
Apeh	Q8R146	Acylamino-acid-releasing enzyme OS=Mus musculus OX=10090 GN=Apeh PE=1 SV=3	1.55994e+07	3.22114e+07	2.76926e+07	8.24017e+06	4.67703e+07	6.45799e+06	9.78017e+06	3.93455e+06	4.75726e+06	1.10292e+07	1.14889e+07	3.63029e+06	5.1721e+06	3.20335e+06	1.58058e+06	6.62223e+06	4.02945e+07
Apmap	Q9D7N9	Adipocyte plasma membrane-associated protein OS=Mus musculus OX=10090 GN=Apmap PE=1 SV=1	10563.3	782370	918642	468795	1.72317e+06	833230	1.26522e+06	2.92956e+06	1.7474e+06	964252	3.13364e+06	1.58608e+06	1.4861e+07	9.93801e+06	6.29953e+06	1.43919e+07	1.87442e+07
Apoa1	Q00623	Apolipoprotein A-I OS=Mus musculus OX=10090 GN=Apoa1 PE=1 SV=2	8.06451e+10	8.23402e+10	8.41607e+10	9.28093e+10	8.26907e+10	8.63563e+10	6.73228e+10	9.23164e+10	6.42935e+10	8.26477e+10	8.85454e+10	8.30536e+10	9.30233e+10	9.07671e+10	7.86099e+10	9.15139e+10	9.41408e+10
Apoa2	P09813	Apolipoprotein A-II OS=Mus musculus OX=10090 GN=Apoa2 PE=1 SV=2	3.62449e+09	3.70507e+09	5.93328e+09	4.44527e+09	4.56497e+09	4.54521e+09	7.18854e+09	8.13938e+09	6.12732e+09	5.9922e+09	9.99061e+09	6.18766e+09	1.6614e+10	1.07343e+10	1.23119e+10	1.11233e+10	1.28482e+10
Apoa4	P06728	Apolipoprotein A-IV OS=Mus musculus OX=10090 GN=Apoa4 PE=1 SV=3	1.21676e+10	1.26799e+10	1.36644e+10	1.31049e+10	1.1629e+10	1.55854e+10	1.2712e+10	2.5887e+10	1.89324e+10	2.07486e+10	1.88654e+10	1.83581e+10	1.57456e+10	1.59334e+10	1.35426e+10	1.65587e+10	1.52313e+10
Apoa5	Q8C7G5	Apolipoprotein A-V OS=Mus musculus OX=10090 GN=Apoa5 PE=1 SV=1	3.80241e+07	7.45904e+07	4.08262e+07	4.47654e+07	4.25036e+07	6.30915e+07	1.03612e+08	1.09496e+08	1.4562e+08	2.23643e+08	6.14122e+07	4.79508e+07	4.43543e+07	4.65549e+07	1.64925e+07	8.26642e+07	1.13713e+08
Apob	E9Q414	Apolipoprotein B-100 OS=Mus musculus OX=10090 GN=Apob PE=1 SV=1	1.89331e+10	1.24553e+10	1.43274e+10	1.46705e+10	1.4958e+10	1.08342e+10	1.08639e+10	1.42178e+10	6.69821e+09	8.47118e+09	9.79178e+09	8.26499e+09	7.58596e+09	7.36454e+09	3.92431e+09	7.70247e+09	8.58322e+09
Apobr	Q8VBT6	Apolipoprotein B receptor OS=Mus musculus OX=10090 GN=Apobr PE=1 SV=1	946379	1.15151e+06	936369	764282	1.10769e+06	1.35567e+06	646547	10563.3	10563.3	10563.3	429871	10563.3	10563.3	10563.3	10563.3	10563.3	10563.3
Apoc1	P34928	Apolipoprotein C-I OS=Mus musculus OX=10090 GN=Apoc1 PE=1 SV=1	8.62169e+08	1.53447e+09	2.1464e+09	1.25697e+09	1.15756e+09	1.55398e+09	1.71894e+09	2.68002e+09	1.65573e+09	3.79067e+09	2.86797e+09	2.45885e+09	4.82476e+09	5.29505e+09	3.40729e+09	3.90532e+09	3.83384e+09
Apoc2	Q05020	Apolipoprotein C-II OS=Mus musculus OX=10090 GN=Apoc2 PE=2 SV=1	6.76221e+07	1.18839e+08	1.84466e+08	1.32194e+08	1.77278e+08	1.88914e+08	1.2691e+08	2.95445e+08	1.23277e+08	4.94744e+08	2.55059e+08	2.70842e+08	4.674e+08	6.47891e+08	2.4206e+08	3.36227e+08	5.82696e+08
Apoc3	P33622	Apolipoprotein C-III OS=Mus musculus OX=10090 GN=Apoc3 PE=1 SV=2	6.39883e+08	1.10986e+09	1.52028e+09	1.40385e+09	1.71842e+09	1.65865e+09	1.36718e+09	2.51716e+09	1.33413e+09	3.12831e+09	1.94251e+09	2.36729e+09	2.75052e+09	3.06246e+09	1.49953e+09	1.90762e+09	3.07686e+09
Apoc4	Q61268	Apolipoprotein C-IV OS=Mus musculus OX=10090 GN=Apoc4 PE=1 SV=1	2.68903e+08	4.29242e+08	3.70158e+08	4.00268e+08	7.42077e+08	4.3322e+08	1.79682e+08	9.8448e+08	5.04242e+08	2.32419e+09	6.42261e+08	8.18343e+08	1.69249e+09	7.84325e+08	9.04345e+08	5.67095e+08	3.95357e+08
Apod	P51910	Apolipoprotein D OS=Mus musculus OX=10090 GN=Apod PE=1 SV=1	9.45085e+08	1.26939e+09	1.35431e+09	1.24383e+09	1.30773e+09	1.45556e+09	7.66465e+08	4.43783e+08	2.93455e+08	7.42848e+08	7.95107e+08	3.9515e+08	1.02873e+09	8.21246e+08	9.31157e+08	7.51731e+08	9.02462e+08
Apoe	P08226	Apolipoprotein E OS=Mus musculus OX=10090 GN=Apoe PE=1 SV=2	7.82063e+09	7.37066e+09	1.1223e+10	1.16433e+10	9.33538e+09	1.09928e+10	1.68677e+10	1.88357e+10	1.19313e+10	1.34916e+10	1.4532e+10	8.5553e+09	2.01393e+10	1.58547e+10	9.43748e+09	1.57239e+10	2.2449e+10
Apof	Q91V80	Apolipoprotein F OS=Mus musculus OX=10090 GN=Apof PE=2 SV=2	1.14407e+07	3.25838e+07	7.22446e+07	5.67996e+07	3.55685e+07	5.08543e+07	7.97967e+07	3.31091e+07	6.45828e+07	3.55684e+07	3.22786e+07	1.31306e+07	5.35149e+07	2.61479e+07	7.80131e+07	7.00621e+07	5.72658e+07
Apoh	Q01339	Beta-2-glycoprotein 1 OS=Mus musculus OX=10090 GN=Apoh PE=1 SV=1	1.83251e+08	2.1922e+08	3.54722e+08	4.0356e+08	1.7478e+08	3.88483e+08	8.38222e+08	1.47613e+08	1.21101e+09	5.15938e+08	7.97271e+08	1.15605e+09	2.04337e+08	3.23413e+08	8.89248e+08	2.45671e+08	8.49978e+07
Apom	Q9Z1R3	Apolipoprotein M OS=Mus musculus OX=10090 GN=Apom PE=1 SV=1	1.10428e+09	1.28601e+09	8.94264e+08	8.76334e+08	1.39533e+09	8.28482e+08	9.19163e+07	2.33962e+08	1.81447e+08	4.20466e+08	4.27513e+08	2.94693e+08	1.0028e+08	1.30755e+08	8.11947e+07	5.8852e+07	3.83566e+07
App	P12023	Amyloid-beta A4 protein OS=Mus musculus OX=10090 GN=App PE=1 SV=3	10563.3	10563.3	10563.3	10563.3	10563.3	10563.3	10563.3	10563.3	10563.3	10563.3	10563.3	10563.3	10563.3	10563.3	10563.3	10563.3	10563.3
Aprt	P08030	Adenine phosphoribosyltransferase OS=Mus musculus OX=10090 GN=Aprt PE=1 SV=2	10563.3	10563.3	10563.3	10563.3	10563.3	10563.3	10563.3	10563.3	10563.3	329212	559464	10563.3	10563.3	10563.3	10563.3	10563.3	10563.3
Aqp1	Q02013	Aquaporin-1 OS=Mus musculus OX=10090 GN=Aqp1 PE=1 SV=3	10563.3	10563.3	770110	10563.3	1.46302e+06	10563.3	10563.3	323475	10563.3	10563.3	10563.3	10563.3	10563.3	10563.3	10563.3	10563.3	10563.3
Arcn1	Q5XJY5	Coatomer subunit delta OS=Mus musculus OX=10090 GN=Arcn1 PE=1 SV=2	10563.3	425883	10563.3	10563.3	10563.3	10563.3	10563.3	10563.3	10563.3	10563.3	10563.3	10563.3	10563.3	10563.3	10563.3	10563.3	10563.3
Arf3	P61205	ADP-ribosylation factor 3 OS=Mus musculus OX=10090 GN=Arf3 PE=2 SV=2	4.40719e+06	1.0308e+07	6.06618e+06	8.91327e+06	8.43866e+06	4.35336e+06	5.59135e+06	2.49873e+06	5.3241e+06	6.38436e+06	1.34393e+07	2.66492e+06	1.79846e+07	9.64772e+06	1.3986e+07	2.06928e+07	3.68872e+07
Arf4	P61750	ADP-ribosylation factor 4 OS=Mus musculus OX=10090 GN=Arf4 PE=1 SV=2	322167	758665	206357	719974	10563.3	10563.3	432926	10563.3	345637	1.4591e+06	1.38617e+06	10563.3	4.40538e+06	2.34884e+06	3.49857e+06	3.7299e+06	4.77346e+06
Arf5	P84084	ADP-ribosylation factor 5 OS=Mus musculus OX=10090 GN=Arf5 PE=1 SV=2	9.23099e+06	1.61897e+07	1.05855e+07	1.29036e+07	1.6108e+07	5.77615e+06	9.19711e+06	4.93595e+06	9.33941e+06	9.41795e+06	2.04307e+07	4.30706e+06	1.67976e+07	2.23254e+07	1.9733e+07	2.49087e+07	6.46795e+06
Arf6	P62331	ADP-ribosylation factor 6 OS=Mus musculus OX=10090 GN=Arf6 PE=1 SV=2	236860	751595	338792	684383	422831	10563.3	10563.3	10563.3	10563.3	336252	630683	10563.3	350375	10563.3	232348	333299	651168
Arg1	Q61176	Arginase-1 OS=Mus musculus OX=10090 GN=Arg1 PE=1 SV=1	2.74893e+06	2.19659e+06	1.22585e+06	2.13642e+06	5.10661e+06	6.00467e+06	3.60731e+07	8.48351e+07	2.96261e+07	9.33247e+07	7.37743e+07	3.54463e+07	1.21651e+08	1.16704e+08	2.68779e+07	1.65633e+08	1.96293e+08
Arhgap1	Q5FWK3	Rho GTPase-activating protein 1 OS=Mus musculus OX=10090 GN=Arhgap1 PE=1 SV=1	397155	1.20843e+06	656665	10563.3	10563.3	10563.3	10563.3	466560	10563.3	10563.3	10563.3	10563.3	490824	10563.3	368154	634120	593588
Arhgap18	Q8K0Q5	Rho GTPase-activating protein 18 OS=Mus musculus OX=10090 GN=Arhgap18 PE=1 SV=1	10563.3	183484	315968	251700	10563.3	10563.3	10563.3	10563.3	10563.3	10563.3	263100	10563.3	10563.3	10563.3	10563.3	10563.3	10563.3
Arhgap45	Q3TBD2	Rho GTPase-activating protein 45 OS=Mus musculus OX=10090 GN=Arhgap45 PE=1 SV=2	1.12221e+06	3.26461e+06	837176	136571	348350	117654	244883	1.0383e+06	1.79706e+06	10563.3	295379	5.06738e+06	10563.3	10563.3	10563.3	10563.3	10563.3
Arhgef10l	A2AWP8	Rho guanine nucleotide exchange factor 10-like protein OS=Mus musculus OX=10090 GN=Arhgef10l PE=1 SV=1	3.78881e+06	3.73434e+06	8.86899e+06	5.26855e+06	10563.3	8.60697e+06	9.79296e+06	3.37925e+06	1.22896e+07	1.49786e+07	9.74888e+06	4.09225e+06	10563.3	10563.3	10563.3	10563.3	10563.3
Arl8b	Q9CQW2	ADP-ribosylation factor-like protein 8B OS=Mus musculus OX=10090 GN=Arl8b PE=1 SV=1	10563.3	165185	10563.3	142902	262489	10563.3	10563.3	10563.3	10563.3	10563.3	176359	10563.3	10563.3	10563.3	10563.3	10563.3	10563.3
Armc6	Q8BNU0	Armadillo repeat-containing protein 6 OS=Mus musculus OX=10090 GN=Armc6 PE=1 SV=1	322098	306401	696447	473902	614298	1.19176e+06	10563.3	10563.3	10563.3	150089	10563.3	10563.3	10563.3	10563.3	10563.3	10563.3	10563.3
Arpc2	Q9CVB6	Actin-related protein 2/3 complex subunit 2 OS=Mus musculus OX=10090 GN=Arpc2 PE=1 SV=3	4.01139e+06	3.47674e+06	2.43528e+06	4.7903e+06	2.92305e+06	2.46604e+06	2.07316e+06	692359	1.42398e+06	711457	2.86806e+06	1.6025e+06	10563.3	10563.3	10563.3	10563.3	10563.3
Arpc3	Q9JM76	Actin-related protein 2/3 complex subunit 3 OS=Mus musculus OX=10090 GN=Arpc3 PE=1 SV=3	1.65555e+06	2.12613e+06	3.81574e+06	2.83641e+06	2.66544e+06	2.40799e+06	1.4135e+06	6.98066e+06	4.62278e+06	1.00462e+07	2.40364e+06	2.02644e+06	10563.3	10563.3	10563.3	932555	852986
Arpc4	P59999	Actin-related protein 2/3 complex subunit 4 OS=Mus musculus OX=10090 GN=Arpc4 PE=1 SV=3	853833	1.18823e+06	976636	3.06301e+06	1.94229e+06	1.47799e+06	304810	623182	353720	383057	1.33634e+06	10563.3	966163	528214	443017	1.3556e+06	1.54864e+06
Arpp21	Q9DCB4	cAMP-regulated phosphoprotein 21 OS=Mus musculus OX=10090 GN=Arpp21 PE=1 SV=2	10563.3	10563.3	10563.3	10563.3	10563.3	10563.3	10563.3	10563.3	10563.3	10563.3	10563.3	10563.3	537675	862924	577572	582302	672092
Arrdc2	Q9D668	Arrestin domain-containing protein 2 OS=Mus musculus OX=10090 GN=Arrdc2 PE=2 SV=1	7.60552e+08	7.86595e+08	1.02692e+09	8.88431e+08	1.08013e+09	8.94605e+08	1.1728e+09	4.14352e+08	9.46331e+08	1.22535e+09	1.17651e+09	1.09066e+09	10563.3	10563.3	10563.3	10563.3	10563.3
Arsa	P50428	Arylsulfatase A OS=Mus musculus OX=10090 GN=Arsa PE=1 SV=2	327226	180943	10563.3	187696	151720	10563.3	10563.3	10563.3	10563.3	10563.3	10563.3	158297	10563.3	10563.3	10563.3	10563.3	10563.3
Arsg	Q3TYD4	Arylsulfatase G OS=Mus musculus OX=10090 GN=Arsg PE=2 SV=1	5.49153e+06	6.82581e+06	9.34593e+06	9.05899e+06	7.44441e+06	1.00911e+07	6.97457e+06	9.51801e+06	7.17024e+06	6.72997e+06	5.71546e+06	8.15712e+06	1.89906e+07	1.37622e+07	9.72938e+06	2.06124e+07	3.02202e+07
Asah1	Q9WV54	Acid ceramidase OS=Mus musculus OX=10090 GN=Asah1 PE=1 SV=1	1.21107e+06	1.43672e+06	702233	729720	688081	912302	291165	1.66296e+06	1.91027e+06	497866	678154	1.50356e+06	376529	477195	296298	207547	559510
Asah2	Q9JHE3	Neutral ceramidase OS=Mus musculus OX=10090 GN=Asah2 PE=1 SV=1	3.282e+06	1.872e+06	1.59218e+06	1.65154e+06	2.17741e+06	1.03919e+06	3.5506e+06	3.57302e+06	4.43517e+06	2.87263e+06	2.30658e+06	4.29696e+06	4.50167e+06	6.29358e+06	1.89066e+07	3.40712e+06	6.75915e+06
Asl	Q91YI0	Argininosuccinate lyase OS=Mus musculus OX=10090 GN=Asl PE=1 SV=1	8.90101e+06	1.13068e+07	7.15327e+06	1.68238e+07	1.70017e+07	1.42689e+07	2.5714e+07	6.19409e+07	5.68874e+07	7.90143e+07	7.08004e+07	2.28444e+07	5.9576e+07	1.03343e+08	8.23182e+06	8.30849e+07	8.49679e+07
Aspdh	Q9DCQ2	Putative L-aspartate dehydrogenase OS=Mus musculus OX=10090 GN=Aspdh PE=1 SV=1	10563.3	10563.3	10563.3	10563.3	10563.3	10563.3	10563.3	718950	10563.3	10563.3	10563.3	10563.3	2.33942e+06	5.06739e+06	416941	3.53285e+06	1.93256e+06
Aspn	Q99MQ4	Asporin OS=Mus musculus OX=10090 GN=Aspn PE=1 SV=1	1.20483e+07	1.49381e+07	1.15525e+07	1.51574e+07	6.81993e+06	1.22169e+07	2.28462e+07	2.54388e+06	5.54564e+06	9.87188e+06	7.06656e+06	5.6416e+06	2.08069e+06	4.19157e+06	2.10195e+06	1.00928e+07	1.90777e+06
Asprv1	Q09PK2	Retroviral-like aspartic protease 1 OS=Mus musculus OX=10090 GN=Asprv1 PE=1 SV=1	1.77629e+06	1.66286e+06	1.46299e+06	1.68399e+06	1.48583e+06	911230	1.08703e+06	1.3295e+06	1.48343e+06	930705	963801	1.1507e+06	10563.3	10563.3	10563.3	10563.3	10563.3
Ass1	P16460	Argininosuccinate synthase OS=Mus musculus OX=10090 GN=Ass1 PE=1 SV=1	381719	3.62839e+06	359054	1.17715e+06	2.35383e+06	907021	745010	6.9519e+06	882315	1.89796e+07	3.80704e+06	1.31561e+06	1.40023e+07	2.21858e+07	2.33719e+07	1.98649e+07	2.91106e+07
Atf7ip	Q7TT18	Activating transcription factor 7-interacting protein 1 OS=Mus musculus OX=10090 GN=Atf7ip PE=1 SV=1	4.40731e+08	3.66606e+08	3.06571e+08	4.59041e+08	4.70553e+08	3.94519e+08	2.89616e+08	3.48053e+08	2.0623e+08	9.49435e+07	2.74939e+08	1.53339e+08	10563.3	10563.3	10563.3	10563.3	10563.3
Atg3	Q9CPX6	Ubiquitin-like-conjugating enzyme ATG3 OS=Mus musculus OX=10090 GN=Atg3 PE=1 SV=1	10563.3	10563.3	10563.3	10563.3	10563.3	10563.3	10563.3	10563.3	10563.3	10563.3	10563.3	10563.3	10563.3	2.53182e+06	1.75058e+06	10563.3	10563.3
Atic	Q9CWJ9	Bifunctional purine biosynthesis protein ATIC OS=Mus musculus OX=10090 GN=Atic PE=1 SV=2	374380	345510	10563.3	292235	468794	139021	10563.3	203191	10563.3	10563.3	10563.3	10563.3	10563.3	10563.3	10563.3	10563.3	10563.3
Atp1a1	Q8VDN2	Sodium/potassium-transporting ATPase subunit alpha-1 OS=Mus musculus OX=10090 GN=Atp1a1 PE=1 SV=1	10563.3	10563.3	10563.3	3.95465e+06	10563.3	10563.3	10563.3	10563.3	10563.3	225895	10563.3	10563.3	1.1289e+06	10563.3	1.31175e+07	10563.3	10563.3
Atp1a2	Q6PIE5	Sodium/potassium-transporting ATPase subunit alpha-2 OS=Mus musculus OX=10090 GN=Atp1a2 PE=1 SV=1	10563.3	10563.3	10563.3	1.75485e+06	155498	10563.3	10563.3	878649	10563.3	10563.3	10563.3	10563.3	10563.3	10563.3	10563.3	10563.3	10563.3
Atp1a3	Q6PIC6	Sodium/potassium-transporting ATPase subunit alpha-3 OS=Mus musculus OX=10090 GN=Atp1a3 PE=1 SV=1	1.55726e+07	2.65478e+07	1.97693e+07	5.30994e+07	1.25188e+07	2.87426e+07	1.81883e+07	4.65808e+06	3.78663e+06	2.55973e+07	1.0842e+07	4.91536e+06	10563.3	10563.3	10563.3	10563.3	10563.3
Atp1b1	P14094	Sodium/potassium-transporting ATPase subunit beta-1 OS=Mus musculus OX=10090 GN=Atp1b1 PE=1 SV=1	10563.3	10563.3	10563.3	1.16832e+07	10563.3	10563.3	3.20354e+06	734099	459482	2.86775e+06	840123	10563.3	10563.3	10563.3	10563.3	10563.3	10563.3
Atp1b2	P14231	Sodium/potassium-transporting ATPase subunit beta-2 OS=Mus musculus OX=10090 GN=Atp1b2 PE=1 SV=2	10563.3	10563.3	10563.3	554813	10563.3	10563.3	10563.3	10563.3	412931	522836	298500	10563.3	10563.3	10563.3	10563.3	10563.3	10563.3
Atp2a1	Q8R429	Sarcoplasmic/endoplasmic reticulum calcium ATPase 1 OS=Mus musculus OX=10090 GN=Atp2a1 PE=1 SV=1	1.56994e+06	290717	235868	960233	1.21316e+06	835961	3.76393e+06	10563.3	6.53564e+06	141762	10563.3	10563.3	10563.3	10563.3	10563.3	10563.3	10563.3
Atp2a2	O55143	Sarcoplasmic/endoplasmic reticulum calcium ATPase 2 OS=Mus musculus OX=10090 GN=Atp2a2 PE=1 SV=2	10563.3	10563.3	10563.3	440258	10563.3	10563.3	523856	10563.3	10563.3	10563.3	10563.3	10563.3	10563.3	10563.3	10563.3	10563.3	10563.3
Atp2a3	Q64518	Sarcoplasmic/endoplasmic reticulum calcium ATPase 3 OS=Mus musculus OX=10090 GN=Atp2a3 PE=1 SV=3	10563.3	10563.3	10563.3	10563.3	10563.3	10563.3	10563.3	10563.3	10563.3	10563.3	10563.3	10563.3	2.06021e+06	2.10099e+06	10563.3	10563.3	10563.3
Atp2b4	Q6Q477	Plasma membrane calcium-transporting ATPase 4 OS=Mus musculus OX=10090 GN=Atp2b4 PE=1 SV=1	10563.3	10563.3	10563.3	516185	10563.3	10563.3	10563.3	10563.3	10563.3	10563.3	10563.3	10563.3	10563.3	10563.3	10563.3	10563.3	10563.3
Atp5f1a	Q03265	ATP synthase subunit alpha, mitochondrial OS=Mus musculus OX=10090 GN=Atp5f1a PE=1 SV=1	2.652e+06	5.85696e+06	5.24745e+06	2.88318e+07	1.2117e+06	2.45055e+06	6.17306e+06	3.60948e+06	3.2933e+06	5.113e+07	7.36866e+06	2.97415e+06	396821	6.91382e+06	6.49285e+06	1.71749e+06	291239
Atp5f1b	P56480	ATP synthase subunit beta, mitochondrial OS=Mus musculus OX=10090 GN=Atp5f1b PE=1 SV=2	1.04127e+07	2.65502e+06	1.11567e+07	4.9264e+07	8.50552e+06	6.19963e+06	1.79976e+07	1.68422e+07	1.07072e+07	3.44866e+07	2.08324e+07	1.03879e+07	3.48192e+06	9.88733e+06	1.00532e+07	6.16284e+06	3.44882e+06
Atp5f1c	Q91VR2	ATP synthase subunit gamma, mitochondrial OS=Mus musculus OX=10090 GN=Atp5f1c PE=1 SV=1	384752	10563.3	10563.3	1.44999e+06	10563.3	10563.3	1.76503e+06	5.93834e+06	2.85206e+06	1.09683e+06	1.42129e+06	1.18071e+06	10563.3	10563.3	10563.3	10563.3	10563.3
Atp5f1d	Q9D3D9	ATP synthase subunit delta, mitochondrial OS=Mus musculus OX=10090 GN=Atp5f1d PE=1 SV=1	10563.3	10563.3	10563.3	3.54933e+06	10563.3	10563.3	10563.3	10563.3	10563.3	1.47819e+06	10563.3	10563.3	10563.3	10563.3	10563.3	10563.3	10563.3
Atp5mc1	Q9CR84	ATP synthase F(0) complex subunit C1, mitochondrial OS=Mus musculus OX=10090 GN=Atp5mc1 PE=1 SV=1	10563.3	10563.3	10563.3	10563.3	10563.3	10563.3	10563.3	10563.3	10563.3	10563.3	10563.3	10563.3	209482	10563.3	365336	50448.4	185568
Atp5mf	P56135	ATP synthase subunit f, mitochondrial OS=Mus musculus OX=10090 GN=Atp5mf PE=1 SV=3	10563.3	10563.3	10563.3	661477	10563.3	10563.3	244372	10563.3	10563.3	600518	174226	10563.3	10563.3	10563.3	10563.3	10563.3	10563.3
Atp5mpl	P56379	ATP synthase subunit ATP5MPL, mitochondrial OS=Mus musculus OX=10090 GN=Atp5mpl PE=1 SV=1	10563.3	10563.3	10563.3	701434	10563.3	10563.3	10563.3	10563.3	10563.3	10563.3	10563.3	10563.3	10563.3	10563.3	10563.3	10563.3	10563.3
Atp5pb	Q9CQQ7	ATP synthase F(0) complex subunit B1, mitochondrial OS=Mus musculus OX=10090 GN=Atp5pb PE=1 SV=1	285336	10563.3	236768	1.30246e+06	229314	187328	248686	869135	10563.3	10563.3	10563.3	10563.3	10563.3	812421	10563.3	10563.3	10563.3
Atp5pd	Q9DCX2	ATP synthase subunit d, mitochondrial OS=Mus musculus OX=10090 GN=Atp5pd PE=1 SV=3	732357	1.55191e+06	222421	1.95325e+06	109774	515417	177926	10563.3	141981	1.16357e+06	578099	10563.3	10563.3	10563.3	10563.3	10563.3	10563.3
Atp5pf	P97450	ATP synthase-coupling factor 6, mitochondrial OS=Mus musculus OX=10090 GN=Atp5pf PE=1 SV=1	10563.3	10563.3	10563.3	814754	10563.3	10563.3	10563.3	10563.3	10563.3	10563.3	10563.3	10563.3	10563.3	10563.3	10563.3	10563.3	10563.3
Atp5po	Q9DB20	ATP synthase subunit O, mitochondrial OS=Mus musculus OX=10090 GN=Atp5po PE=1 SV=1	7.57393e+06	736340	813183	2.40633e+06	3.66002e+06	855821	2.89604e+07	678019	4.88034e+07	824922	10563.3	1.187e+06	10563.3	10563.3	10563.3	10563.3	10563.3
Atp6ap1	Q9R1Q9	V-type proton ATPase subunit S1 OS=Mus musculus OX=10090 GN=Atp6ap1 PE=1 SV=1	613386	824196	1.01111e+06	1.59379e+06	871452	840366	1.20119e+06	214576	1.09088e+06	508047	1.17601e+06	429472	6.55868e+06	1.89826e+06	4.04569e+06	2.79059e+06	3.65445e+06
Atp6ap2	Q9CYN9	Renin receptor OS=Mus musculus OX=10090 GN=Atp6ap2 PE=1 SV=2	10563.3	321573	863584	359272	10563.3	10563.3	387237	766314	378666	486712	1.09232e+06	181717	2.90816e+06	1.18221e+06	2.46722e+06	1.77941e+06	2.30896e+06
Atp6v0a1	Q9Z1G4	V-type proton ATPase 116 kDa subunit a1 OS=Mus musculus OX=10090 GN=Atp6v0a1 PE=1 SV=3	10563.3	274433	10563.3	1.0666e+06	10563.3	211568	10563.3	10563.3	10563.3	10563.3	10563.3	153366	10563.3	10563.3	10563.3	10563.3	10563.3
Atp6v1a	P50516	V-type proton ATPase catalytic subunit A OS=Mus musculus OX=10090 GN=Atp6v1a PE=1 SV=2	4.09232e+06	7.80608e+06	6.77982e+06	1.29294e+07	7.2727e+06	4.33099e+06	3.49273e+06	2.8057e+06	1.98898e+06	5.69676e+06	5.8699e+06	636295	4.45657e+07	6.43728e+07	1.6828e+08	5.38923e+07	1.82456e+07
Atp6v1b2	P62814	V-type proton ATPase subunit B, brain isoform OS=Mus musculus OX=10090 GN=Atp6v1b2 PE=1 SV=1	9.70225e+06	1.83531e+07	1.04311e+07	1.57548e+07	9.10402e+06	1.01346e+07	7.43255e+06	3.42612e+06	4.19645e+06	6.50358e+06	1.22027e+07	5.23268e+06	2.63304e+06	2.48473e+06	1.57382e+06	3.57711e+06	4.44347e+06
Atp6v1e1	P50518	V-type proton ATPase subunit E 1 OS=Mus musculus OX=10090 GN=Atp6v1e1 PE=1 SV=2	3.34894e+06	5.29375e+06	2.08743e+06	5.36473e+06	3.55731e+06	2.27754e+06	2.88736e+06	1.33422e+06	1.03983e+06	3.42552e+06	2.57375e+06	1.48844e+06	10563.3	10563.3	10563.3	10563.3	10563.3
Atp6v1f	Q9D1K2	V-type proton ATPase subunit F OS=Mus musculus OX=10090 GN=Atp6v1f PE=1 SV=2	217879	439157	489104	675962	421822	328881	576378	10563.3	302635	523600	288009	340114	10563.3	10563.3	1.72694e+06	10563.3	10563.3
Atp6v1g1	Q9CR51	V-type proton ATPase subunit G 1 OS=Mus musculus OX=10090 GN=Atp6v1g1 PE=1 SV=3	414607	10563.3	10563.3	755858	934035	601931	10563.3	10563.3	10563.3	10563.3	10563.3	10563.3	10563.3	10563.3	10563.3	10563.3	10563.3
Avp	P35455	Vasopressin-neurophysin 2-copeptin OS=Mus musculus OX=10090 GN=Avp PE=2 SV=1	803910	764553	758868	342643	995329	250736	763472	10563.3	10563.3	10563.3	516179	10563.3	2.66493e+06	788316	2.8767e+06	3.95022e+06	940716
Axl	Q00993	Tyrosine-protein kinase receptor UFO OS=Mus musculus OX=10090 GN=Axl PE=1 SV=2	10563.3	10563.3	10563.3	10563.3	10563.3	1.41416e+06	10563.3	10563.3	10563.3	10563.3	10563.3	10563.3	10563.3	10563.3	10563.3	10563.3	10563.3
Azgp1	Q64726	Zinc-alpha-2-glycoprotein OS=Mus musculus OX=10090 GN=Azgp1 PE=1 SV=2	8.2113e+07	5.30532e+07	6.91484e+07	7.40004e+07	6.14879e+07	7.25878e+07	1.25932e+08	5.60502e+07	1.50325e+08	5.63122e+07	1.24158e+08	1.08926e+08	8.2339e+07	1.07011e+08	2.19171e+08	1.35368e+08	7.67864e+07
B2m	P01887	Beta-2-microglobulin OS=Mus musculus OX=10090 GN=B2m PE=1 SV=2	1.66311e+09	1.49634e+09	8.53694e+08	9.4641e+08	1.68367e+09	8.78464e+08	1.80119e+09	6.08077e+09	1.52361e+09	1.4182e+09	2.71482e+09	1.57884e+09	4.10111e+09	3.00469e+09	2.88542e+09	2.68592e+09	3.00889e+09
B4galnt1	Q09200	Beta-1,4 N-acetylgalactosaminyltransferase 1 OS=Mus musculus OX=10090 GN=B4galnt1 PE=1 SV=1	1.37285e+07	1.5865e+07	1.96718e+07	1.57501e+07	1.49102e+07	2.10776e+07	1.66474e+07	1.38993e+07	1.3928e+07	1.23684e+07	1.76561e+07	1.59536e+07	1.70973e+07	2.27921e+07	1.31558e+07	2.69685e+07	1.93471e+07
B4galt1	P15535	Beta-1,4-galactosyltransferase 1 OS=Mus musculus OX=10090 GN=B4galt1 PE=1 SV=1	1.7444e+06	1.4538e+06	2.28634e+06	1.39316e+06	1.46568e+06	1.20724e+06	1.31935e+06	421435	1.74086e+06	654199	803106	724799	10563.3	10563.3	10563.3	10563.3	10563.3
B4galt5	Q9JMK0	Beta-1,4-galactosyltransferase 5 OS=Mus musculus OX=10090 GN=B4galt5 PE=1 SV=2	10563.3	10563.3	10563.3	10563.3	10563.3	10563.3	10563.3	10563.3	10563.3	10563.3	10563.3	10563.3	525422	449447	959418	660142	409990
B4gat1	Q8BWP8	Beta-1,4-glucuronyltransferase 1 OS=Mus musculus OX=10090 GN=B4gat1 PE=1 SV=1	981598	929876	1.25605e+06	834290	937739	1.21435e+06	999670	263327	708731	744015	1.06511e+06	1.13915e+06	1.14096e+06	1.88057e+06	1.81875e+06	1.36764e+06	436246
Baat	Q91X34	Bile acid-CoA:amino acid N-acyltransferase OS=Mus musculus OX=10090 GN=Baat PE=1 SV=1	10563.3	10563.3	10563.3	10563.3	10563.3	10563.3	10563.3	10563.3	10563.3	10563.3	10563.3	10563.3	476185	623103	478843	914555	1.0271e+06
Banf1	O54962	Barrier-to-autointegration factor OS=Mus musculus OX=10090 GN=Banf1 PE=1 SV=1	801956	1.62082e+06	690827	547922	4.27984e+06	324187	688011	10563.3	643063	10563.3	296696	267616	883190	715276	477993	1.20261e+06	1.05802e+06
Basp1	Q91XV3	Brain acid soluble protein 1 OS=Mus musculus OX=10090 GN=Basp1 PE=1 SV=3	10563.3	10563.3	402830	9.91915e+06	309812	10563.3	2.28757e+06	262110	10563.3	2.56183e+06	10563.3	10563.3	10563.3	10563.3	10563.3	10563.3	10563.3
Bbox1	Q924Y0	Gamma-butyrobetaine dioxygenase OS=Mus musculus OX=10090 GN=Bbox1 PE=1 SV=1	10563.3	10563.3	10563.3	10563.3	10563.3	10563.3	10563.3	10563.3	10563.3	10563.3	10563.3	10563.3	3.44159e+07	6.56109e+07	1.03024e+08	1.77451e+07	8.59808e+07
Bche	Q03311	Cholinesterase OS=Mus musculus OX=10090 GN=Bche PE=1 SV=2	1.42668e+07	6.39356e+06	8.18914e+06	7.09776e+06	1.10674e+07	8.16615e+06	5.3789e+06	1.60484e+07	9.1349e+06	1.51951e+07	2.3351e+07	1.37525e+07	1.77458e+07	1.96799e+07	2.70097e+07	2.6838e+07	3.35498e+07
Bcl2l13	P59017	Bcl-2-like protein 13 OS=Mus musculus OX=10090 GN=Bcl2l13 PE=1 SV=2	10563.3	10563.3	235366	10563.3	10563.3	10563.3	10563.3	454537	10563.3	10563.3	10563.3	10563.3	10563.3	10563.3	10563.3	10563.3	10563.3
Bfsp2	Q6NVD9	Phakinin OS=Mus musculus OX=10090 GN=Bfsp2 PE=1 SV=1	10563.3	10563.3	10563.3	10563.3	10563.3	10563.3	10563.3	10563.3	10563.3	10563.3	10563.3	10563.3	583393	894139	530394	356653	368047
Bhmt	O35490	Betaine--homocysteine S-methyltransferase 1 OS=Mus musculus OX=10090 GN=Bhmt PE=1 SV=1	794083	649996	513470	212500	672767	1.0394e+06	3.63636e+06	3.77963e+07	5.38013e+06	1.37593e+07	5.6744e+07	1.14857e+07	1.4545e+08	1.79917e+08	1.71104e+07	1.34646e+08	1.5671e+08
Bin2	D3Z6Q9	Bridging integrator 2 OS=Mus musculus OX=10090 GN=Bin2 PE=1 SV=1	4.77323e+06	7.10928e+06	4.50857e+06	5.2369e+06	1.5469e+06	3.50602e+06	2.98018e+06	1.27835e+06	3.44388e+06	1.62513e+06	6.05767e+06	274393	1.39087e+06	10563.3	492948	1.67895e+06	1.92812e+06
Birc6	O88738	Baculoviral IAP repeat-containing protein 6 OS=Mus musculus OX=10090 GN=Birc6 PE=1 SV=2	10563.3	10563.3	10563.3	10563.3	10563.3	10563.3	10563.3	10563.3	10563.3	10563.3	10563.3	10563.3	919815	1.45684e+06	1.22249e+06	792630	812886
Blvrb	Q923D2	Flavin reductase (NADPH) OS=Mus musculus OX=10090 GN=Blvrb PE=1 SV=3	2.6501e+06	3.97236e+06	2.13081e+06	787556	6.23626e+06	10563.3	754418	136523	893977	1.63116e+06	4.09094e+06	435739	1.73933e+06	515925	1.93525e+06	2.39978e+06	2.39985e+06
Bmp1	P98063	Bone morphogenetic protein 1 OS=Mus musculus OX=10090 GN=Bmp1 PE=1 SV=2	1.64901e+07	2.39155e+07	3.45028e+07	2.32752e+07	1.57971e+07	2.13148e+07	6.33511e+07	2.86375e+07	3.10935e+07	2.01784e+07	3.9005e+07	4.22285e+07	2.84121e+07	3.4584e+07	3.11531e+07	4.83756e+07	3.96762e+07
Bnip1	Q6QD59	Vesicle transport protein SEC20 OS=Mus musculus OX=10090 GN=Bnip1 PE=1 SV=1	364908	1.49782e+06	1.96833e+06	459933	291486	287436	387159	1.64018e+06	10563.3	10563.3	1.37352e+06	1.1849e+06	4.61696e+06	3.9434e+06	4.56385e+06	10563.3	10563.3
Bpgm	P15327	Bisphosphoglycerate mutase OS=Mus musculus OX=10090 GN=Bpgm PE=1 SV=2	10563.3	1.18897e+06	540302	10563.3	463015	10563.3	10563.3	10563.3	10563.3	516638	402671	10563.3	10563.3	10563.3	10563.3	10563.3	10563.3
Bpifa2	P07743	BPI fold-containing family A member 2 OS=Mus musculus OX=10090 GN=Bpifa2 PE=1 SV=1	3.87717e+08	5.19654e+08	4.35743e+08	3.993e+08	4.7066e+08	3.35018e+08	5.50674e+08	2.78121e+08	1.56958e+08	3.15468e+08	5.11126e+08	3.30961e+08	6.31862e+08	4.07221e+08	2.67652e+08	1.44695e+09	9.23909e+08
Bpifb1	Q61114	BPI fold-containing family B member 1 OS=Mus musculus OX=10090 GN=Bpifb1 PE=2 SV=4	10563.3	10563.3	10563.3	364047	10563.3	10563.3	10563.3	10563.3	306528	2.59339e+06	462840	10563.3	10563.3	10563.3	10563.3	10563.3	10563.3
Bpifb3	Q80ZU7	BPI fold-containing family B member 3 OS=Mus musculus OX=10090 GN=Bpifb3 PE=2 SV=2	10563.3	336387	529162	339157	226755	568365	10563.3	10563.3	10563.3	205579	198039	10563.3	10563.3	10563.3	10563.3	10563.3	10563.3
Bpnt1	Q9Z0S1	3'(2'),5'-bisphosphate nucleotidase 1 OS=Mus musculus OX=10090 GN=Bpnt1 PE=1 SV=2	396443	373886	10563.3	334655	326402	10563.3	10563.3	10563.3	10563.3	521774	1.15907e+06	387919	10563.3	10563.3	10563.3	10563.3	10563.3
Brf2	Q3UAW9	Transcription factor IIIB 50 kDa subunit OS=Mus musculus OX=10090 GN=Brf2 PE=1 SV=1	5.0742e+06	1.38092e+06	1.71628e+06	1.30966e+06	1.08742e+06	1.37308e+06	659564	838142	606809	367290	287702	703656	10563.3	10563.3	10563.3	10563.3	10563.3
Bsg	P18572	Basigin OS=Mus musculus OX=10090 GN=Bsg PE=1 SV=2	436898	662653	890674	511683	1.81307e+06	417385	10563.3	10563.3	10563.3	10563.3	10563.3	236933	10563.3	10563.3	10563.3	10563.3	10563.3
Btd	Q8CIF4	Biotinidase OS=Mus musculus OX=10090 GN=Btd PE=1 SV=2	1.27934e+06	171051	208239	1.39291e+06	902465	643296	1.60122e+06	525804	2.69091e+06	787091	337754	1.38681e+06	421630	768608	2.54178e+06	1.36888e+06	296695
Btk	P35991	Tyrosine-protein kinase BTK OS=Mus musculus OX=10090 GN=Btk PE=1 SV=4	227128	507640	414784	241798	10563.3	10563.3	10563.3	10563.3	10563.3	10563.3	10563.3	10563.3	10563.3	10563.3	10563.3	10563.3	10563.3
Bzw1	Q9CQC6	Basic leucine zipper and W2 domain-containing protein 1 OS=Mus musculus OX=10090 GN=Bzw1 PE=1 SV=1	1.25633e+06	10563.3	10563.3	152978	10563.3	2.50995e+06	10563.3	10563.3	10563.3	10563.3	10563.3	10563.3	10563.3	10563.3	10563.3	10563.3	10563.3
C1qa	P98086	Complement C1q subcomponent subunit A OS=Mus musculus OX=10090 GN=C1qa PE=1 SV=2	4.85822e+08	5.16983e+08	6.75077e+08	7.19148e+08	6.15349e+08	8.13888e+08	6.40546e+08	7.56869e+08	3.76262e+08	5.24248e+08	2.13413e+08	4.3257e+08	4.74876e+08	4.14012e+08	5.15621e+08	5.75648e+08	3.88183e+08
C1qb	P14106	Complement C1q subcomponent subunit B OS=Mus musculus OX=10090 GN=C1qb PE=1 SV=2	8.68117e+08	7.00937e+08	1.06876e+09	1.12961e+09	1.21897e+09	1.16088e+09	9.38905e+08	6.83041e+08	5.89078e+08	8.83599e+08	3.32339e+08	5.72256e+08	7.58025e+08	7.08912e+08	8.91437e+08	8.8663e+08	5.66596e+08
C1qc	Q02105	Complement C1q subcomponent subunit C OS=Mus musculus OX=10090 GN=C1qc PE=1 SV=2	6.22711e+08	8.1922e+08	1.11924e+09	1.11315e+09	7.71544e+08	1.0549e+09	1.52103e+09	5.05661e+08	9.41295e+08	1.09434e+09	6.25062e+08	5.95764e+08	4.98508e+08	5.2008e+08	5.18921e+08	6.08318e+08	4.54965e+08
C1qtnf3	Q9ES30	Complement C1q tumor necrosis factor-related protein 3 OS=Mus musculus OX=10090 GN=C1qtnf3 PE=2 SV=1	2.84962e+07	4.00472e+07	2.2233e+07	2.53139e+07	1.41784e+07	2.87903e+07	2.10922e+07	1.6893e+07	5.83322e+06	4.55476e+07	1.60627e+07	1.22268e+07	1.59568e+07	3.26154e+07	4.65777e+06	1.75079e+07	1.97667e+07
C1qtnf5	Q8K479	Complement C1q tumor necrosis factor-related protein 5 OS=Mus musculus OX=10090 GN=C1qtnf5 PE=1 SV=1	633995	905823	867517	1.37631e+06	1.07633e+06	1.12499e+06	614840	567574	696129	1.29497e+06	939217	10563.3	2.18736e+06	1.57562e+06	1.85206e+06	2.40509e+06	2.94879e+06
C1ra	Q8CG16	Complement C1r-A subcomponent OS=Mus musculus OX=10090 GN=C1ra PE=1 SV=1	2.78954e+08	3.9305e+08	5.25954e+08	4.35423e+08	4.76243e+08	4.68127e+08	2.11307e+08	2.1835e+08	1.4663e+08	2.98519e+08	2.30693e+08	2.4852e+08	1.63786e+08	2.01457e+08	1.86514e+08	2.62258e+08	2.11701e+08
C1rl	Q3UZ09	Complement C1r subcomponent-like protein OS=Mus musculus OX=10090 GN=C1rl PE=1 SV=1	698315	1.55605e+06	2.07408e+06	321252	247027	650434	1.99233e+06	4.07371e+06	6.05844e+06	2.47379e+06	1.63089e+06	639918	2.94453e+06	4.15289e+06	3.0632e+06	3.60463e+06	4.6157e+06
C1sa	Q8CG14	Complement C1s-A subcomponent OS=Mus musculus OX=10090 GN=C1sa PE=2 SV=2	7.55332e+08	7.94731e+08	9.55011e+08	9.14572e+08	8.87618e+08	9.00781e+08	5.22512e+08	5.24809e+08	3.9852e+08	5.01926e+08	5.8228e+08	4.94659e+08	3.83853e+08	3.56875e+08	3.0327e+08	7.96286e+08	6.59587e+08
C1sb	Q8CFG8	Complement C1s-B subcomponent OS=Mus musculus OX=10090 GN=C1sb PE=2 SV=1	6.39468e+06	5.59114e+06	9.40468e+06	7.82145e+06	8.02664e+06	8.74523e+06	4.71684e+06	1.82199e+06	3.05335e+06	5.58997e+06	5.59256e+06	4.49977e+06	5.18372e+06	4.81896e+06	4.24264e+06	9.32373e+06	7.81993e+06
C2	P21180	Complement C2 OS=Mus musculus OX=10090 GN=C2 PE=1 SV=2	4.20488e+07	3.28684e+07	3.65397e+07	5.69854e+07	4.33164e+07	6.09531e+07	3.04286e+07	1.8883e+07	3.68306e+07	4.70549e+07	4.39178e+07	4.33476e+07	5.18064e+08	4.8334e+08	3.65999e+08	5.11479e+08	4.62575e+08
C3	P01027	Complement C3 OS=Mus musculus OX=10090 GN=C3 PE=1 SV=3	4.93296e+10	4.62643e+10	5.08452e+10	5.90175e+10	5.95683e+10	4.94107e+10	5.61682e+10	5.2047e+10	4.96407e+10	5.09399e+10	5.1806e+10	5.05034e+10	5.26552e+10	4.88961e+10	3.62994e+10	5.34948e+10	4.99147e+10
C4b	P01029	Complement C4-B OS=Mus musculus OX=10090 GN=C4b PE=1 SV=3	1.15258e+10	8.50723e+09	1.05865e+10	1.31592e+10	1.13726e+10	1.18076e+10	1.11613e+10	1.09223e+10	4.77392e+09	7.26245e+09	1.09495e+10	8.41659e+09	1.24232e+10	8.28009e+09	6.77789e+09	1.5528e+10	1.91544e+10
C4bpa	P08607	C4b-binding protein OS=Mus musculus OX=10090 GN=C4bpa PE=1 SV=3	1.93799e+09	1.99009e+09	2.51927e+09	2.45505e+09	2.20698e+09	2.5335e+09	1.05158e+09	9.0381e+08	2.13283e+09	4.07266e+08	2.86024e+09	1.64279e+09	5.23399e+08	4.17826e+08	6.47479e+08	6.7844e+08	7.08701e+08
C5	P06684	Complement C5 OS=Mus musculus OX=10090 GN=C5 PE=1 SV=2	7.62098e+09	6.33999e+09	6.5086e+09	5.78276e+09	6.96112e+09	6.12433e+09	3.3864e+09	3.22226e+09	2.44155e+09	2.92081e+09	3.25325e+09	3.14966e+09	5.15945e+09	3.45179e+09	3.30968e+09	4.79167e+09	5.00511e+09
C8a	Q8K182	Complement component C8 alpha chain OS=Mus musculus OX=10090 GN=C8a PE=1 SV=1	8.57734e+08	8.6952e+08	8.63655e+08	9.28654e+08	8.88006e+08	1.14885e+09	5.5463e+08	2.62593e+08	5.94513e+08	3.42117e+08	4.25021e+08	2.89068e+08	3.05795e+08	2.85733e+08	1.58754e+08	2.43799e+08	2.2382e+08
C8b	Q8BH35	Complement component C8 beta chain OS=Mus musculus OX=10090 GN=C8b PE=1 SV=1	6.33002e+08	7.115e+08	6.133e+08	7.01891e+08	5.8265e+08	8.74481e+08	3.57626e+08	2.93885e+08	3.38189e+08	2.92244e+08	3.01069e+08	2.21271e+08	3.19405e+08	2.9105e+08	1.47606e+08	2.62064e+08	2.26929e+08
C8g	Q8VCG4	Complement component C8 gamma chain OS=Mus musculus OX=10090 GN=C8g PE=1 SV=1	2.77913e+08	3.91552e+08	3.85544e+08	3.30801e+08	3.1153e+08	5.40355e+08	1.71084e+08	1.16043e+08	1.66411e+08	1.26983e+08	2.13437e+08	9.94015e+07	8.1271e+07	8.53507e+07	5.59058e+07	6.68788e+07	7.27396e+07
C9	P06683	Complement component C9 OS=Mus musculus OX=10090 GN=C9 PE=1 SV=2	6.51347e+08	6.48588e+08	4.72332e+08	4.25983e+08	3.65687e+08	6.1209e+08	4.23824e+08	3.06703e+08	4.45041e+08	3.22606e+08	4.41061e+08	3.11508e+08	1.79261e+08	2.01749e+08	2.14958e+08	1.64176e+08	1.20503e+08
Ca1	P13634	Carbonic anhydrase 1 OS=Mus musculus OX=10090 GN=Ca1 PE=1 SV=4	10563.3	10563.3	10563.3	10563.3	10563.3	10563.3	10563.3	10563.3	10563.3	10563.3	10563.3	10563.3	10563.3	10563.3	233276	10563.3	10563.3
Ca2	P00920	Carbonic anhydrase 2 OS=Mus musculus OX=10090 GN=Ca2 PE=1 SV=4	9.55819e+06	1.37852e+07	1.02404e+07	8.21362e+06	2.16139e+07	8.09944e+06	4.71304e+06	3.58102e+06	1.12871e+07	7.56712e+06	1.52089e+07	8.18624e+06	9.10445e+06	1.92574e+07	1.16909e+07	1.05838e+07	5.95808e+06
Ca6	P18761	Carbonic anhydrase 6 OS=Mus musculus OX=10090 GN=Ca6 PE=1 SV=3	10563.3	251751	10563.3	483260	10563.3	10563.3	10563.3	10563.3	10563.3	10563.3	10563.3	10563.3	10563.3	10563.3	10563.3	10563.3	10563.3
Cacna1b	O55017	Voltage-dependent N-type calcium channel subunit alpha-1B OS=Mus musculus OX=10090 GN=Cacna1b PE=1 SV=1	10563.3	10563.3	10563.3	10563.3	10563.3	10563.3	10563.3	10563.3	10563.3	10563.3	10563.3	10563.3	357412	2.42429e+07	2.62783e+07	3.57453e+07	3.51891e+07
Calb2	Q08331	Calretinin OS=Mus musculus OX=10090 GN=Calb2 PE=1 SV=3	199086	10563.3	10563.3	650907	113519	10563.3	10563.3	139464	10563.3	10563.3	10563.3	10563.3	10563.3	10563.3	10563.3	10563.3	10563.3
Calm2	P0DP27	Calmodulin-2 OS=Mus musculus OX=10090 GN=Calm2 PE=1 SV=1	1.01821e+07	2.31522e+07	1.63294e+07	2.9195e+07	1.93587e+07	8.55334e+06	1.06162e+07	810984	3.10379e+06	1.51344e+07	1.82008e+07	2.6955e+06	9.05353e+06	4.1686e+06	3.43682e+06	9.47123e+06	1.41934e+07
Calm4	Q9JM83	Calmodulin-4 OS=Mus musculus OX=10090 GN=Calm4 PE=2 SV=2	10563.3	375587	10563.3	400717	10563.3	10563.3	10563.3	10563.3	229782	266084	2.00079e+06	163204	10563.3	10563.3	10563.3	10563.3	10563.3
Calml3	Q9D6P8	Calmodulin-like protein 3 OS=Mus musculus OX=10090 GN=Calml3 PE=2 SV=1	10563.3	10563.3	10563.3	701199	503854	10563.3	10563.3	264314	354339	10563.3	10563.3	10563.3	10563.3	10563.3	10563.3	10563.3	10563.3
Calr	P14211	Calreticulin OS=Mus musculus OX=10090 GN=Calr PE=1 SV=1	4.47903e+07	6.97537e+07	6.87407e+07	7.5185e+07	5.03418e+07	4.7562e+07	7.90151e+07	4.25971e+07	7.89841e+07	4.10798e+07	7.63441e+07	1.99443e+07	6.15679e+07	4.27809e+07	2.10383e+08	5.67149e+07	8.86824e+07
Calu	O35887	Calumenin OS=Mus musculus OX=10090 GN=Calu PE=1 SV=1	2.24343e+07	3.33802e+07	2.53035e+07	1.12811e+07	1.93101e+07	1.07969e+07	1.82193e+07	1.18873e+07	1.35885e+07	1.32762e+07	9.8428e+06	1.83616e+06	1.99661e+07	1.10111e+07	7.02849e+06	1.57428e+07	3.12352e+07
Camk1	Q91YS8	Calcium/calmodulin-dependent protein kinase type 1 OS=Mus musculus OX=10090 GN=Camk1 PE=1 SV=1	10563.3	316519	190597	10563.3	10563.3	10563.3	379366	10563.3	706548	10563.3	10563.3	122340	10563.3	10563.3	10563.3	10563.3	10563.3
Camk1d	Q8BW96	Calcium/calmodulin-dependent protein kinase type 1D OS=Mus musculus OX=10090 GN=Camk1d PE=1 SV=2	10563.3	10563.3	10563.3	10563.3	10563.3	10563.3	10563.3	10563.3	10563.3	10563.3	10563.3	10563.3	238588	10563.3	10563.3	156554	396224
Camk2a	P11798	Calcium/calmodulin-dependent protein kinase type II subunit alpha OS=Mus musculus OX=10090 GN=Camk2a PE=1 SV=2	10563.3	10563.3	10563.3	6.53097e+06	419902	10563.3	1.42177e+06	10563.3	10563.3	1.26713e+06	10563.3	10563.3	10563.3	10563.3	10563.3	10563.3	10563.3
Camp	P51437	Cathelicidin antimicrobial peptide OS=Mus musculus OX=10090 GN=Camp PE=1 SV=2	7.72401e+06	7.92257e+06	9.83657e+06	8.28275e+06	7.58545e+06	9.18655e+06	4.23826e+07	1.37144e+07	1.10361e+08	2.16725e+07	2.70307e+07	3.5365e+07	5.14779e+07	3.03869e+07	3.94936e+07	2.66677e+07	2.78289e+07
Cand1	Q6ZQ38	Cullin-associated NEDD8-dissociated protein 1 OS=Mus musculus OX=10090 GN=Cand1 PE=1 SV=2	1.016e+07	1.96304e+07	1.33276e+07	9.83465e+06	2.06928e+07	7.43235e+06	5.57105e+06	7.61218e+06	4.87593e+06	1.14068e+07	1.13951e+07	2.74212e+06	7.75029e+06	1.27245e+07	5.28006e+06	1.17699e+07	2.6608e+07
Canx	P35564	Calnexin OS=Mus musculus OX=10090 GN=Canx PE=1 SV=1	3.21711e+07	1.96317e+07	2.21126e+07	1.88347e+07	2.94712e+07	1.98766e+07	1.77781e+07	2.40325e+06	2.40906e+07	1.28017e+07	2.74833e+07	2.34179e+07	4.0048e+06	4.49861e+06	3.57162e+06	2.27365e+06	4.78287e+06
Cap1	P40124	Adenylyl cyclase-associated protein 1 OS=Mus musculus OX=10090 GN=Cap1 PE=1 SV=4	3.73373e+06	8.15629e+06	1.04081e+07	1.53504e+07	5.88283e+06	3.87155e+07	5.0241e+06	979565	5.29742e+06	4.09764e+06	1.48304e+07	1.28206e+06	2.23522e+06	2.63469e+06	10563.3	2.86396e+06	3.31807e+06
Capg	P24452	Macrophage-capping protein OS=Mus musculus OX=10090 GN=Capg PE=1 SV=2	10563.3	10563.3	10563.3	976228	10563.3	852037	3.92954e+06	1.6974e+06	2.75537e+06	1.87796e+06	2.96804e+06	982170	10563.3	10563.3	10563.3	10563.3	10563.3
Capn1	O35350	Calpain-1 catalytic subunit OS=Mus musculus OX=10090 GN=Capn1 PE=1 SV=1	1.59413e+07	1.63373e+07	2.19968e+07	1.27562e+07	1.5946e+07	1.66235e+07	1.13875e+07	954488	9.63293e+06	7.73955e+06	8.78913e+06	1.38975e+06	868670	1.16532e+06	1.04224e+06	1.90047e+06	1.54873e+06
Capn2	O08529	Calpain-2 catalytic subunit OS=Mus musculus OX=10090 GN=Capn2 PE=1 SV=4	1.89636e+07	2.68439e+07	3.47842e+07	2.72669e+07	2.34949e+07	3.70429e+07	2.45107e+07	1.2582e+07	8.54652e+06	2.45276e+07	1.93158e+07	8.48963e+06	4.51053e+07	4.79129e+07	4.95555e+07	8.13533e+07	4.1046e+07
Capns1	O88456	Calpain small subunit 1 OS=Mus musculus OX=10090 GN=Capns1 PE=1 SV=1	1.23362e+07	1.77214e+07	2.12687e+07	2.38828e+07	2.186e+07	2.40534e+07	2.18879e+07	1.32366e+07	1.31923e+07	1.59808e+07	2.53551e+07	1.05049e+07	8.59547e+06	1.0214e+07	8.34049e+06	1.2658e+07	1.8065e+07
Capza1	P47753	F-actin-capping protein subunit alpha-1 OS=Mus musculus OX=10090 GN=Capza1 PE=1 SV=4	2.83806e+06	8.78644e+06	1.15518e+07	8.02598e+06	4.23162e+06	7.18591e+06	4.81805e+06	3.91458e+06	5.96232e+06	4.28819e+06	6.77986e+06	1.48299e+06	4.43175e+06	2.63975e+06	2.49048e+06	5.31333e+06	7.96208e+06
Capza2	P47754	F-actin-capping protein subunit alpha-2 OS=Mus musculus OX=10090 GN=Capza2 PE=1 SV=3	953409	1.70426e+06	3.71231e+06	3.97378e+06	1.2094e+06	2.68837e+06	837583	561743	1.08092e+06	1.81064e+06	4.23439e+06	530495	1.131e+06	686566	882260	987623	2.60947e+06
Capzb	P47757	F-actin-capping protein subunit beta OS=Mus musculus OX=10090 GN=Capzb PE=1 SV=3	3.1014e+06	7.3917e+06	8.05267e+06	7.59144e+06	6.40491e+06	7.20896e+06	7.51111e+06	3.74167e+06	7.76069e+06	5.28859e+06	1.00767e+07	4.76691e+06	3.56133e+06	2.29057e+06	3.26746e+06	3.62267e+06	5.35454e+06
Carhsp1	Q9CR86	Calcium-regulated heat stable protein 1 OS=Mus musculus OX=10090 GN=Carhsp1 PE=1 SV=1	375384	1.04786e+06	1.14586e+06	910816	3.09764e+06	1.00646e+06	975927	1.02104e+06	684612	433653	1.76943e+06	10563.3	520698	196648	184699	371887	734072
Casp6	O08738	Caspase-6 OS=Mus musculus OX=10090 GN=Casp6 PE=1 SV=1	660499	1.19286e+06	991843	676273	719287	1.35241e+06	2.17596e+06	768352	1.28064e+06	1.46621e+06	1.31992e+06	1.39343e+06	10563.3	10563.3	10563.3	10563.3	10563.3
Cass4	Q08EC4	Cas scaffolding protein family member 4 OS=Mus musculus OX=10090 GN=Cass4 PE=1 SV=1	9.80584e+07	9.26189e+07	2.32903e+08	2.40926e+08	1.06007e+08	1.78802e+08	3.77299e+08	2.37911e+08	2.62322e+08	1.59038e+08	3.07392e+08	2.48588e+08	10563.3	10563.3	10563.3	10563.3	10563.3
Cast	P51125	Calpastatin OS=Mus musculus OX=10090 GN=Cast PE=1 SV=2	886572	905867	1.50329e+06	844477	1.47643e+06	1.61381e+06	864785	539721	10563.3	940541	1.46223e+06	497665	10563.3	10563.3	10563.3	10563.3	10563.3
Cat	P24270	Catalase OS=Mus musculus OX=10090 GN=Cat PE=1 SV=4	2.19177e+07	5.379e+07	6.15113e+07	2.4652e+07	3.84149e+07	1.03497e+07	1.16987e+07	7.42853e+06	1.41562e+07	2.61604e+07	5.39105e+07	1.66773e+07	7.7199e+07	6.59693e+07	2.61258e+07	1.11338e+08	1.39531e+08
Cavin1	O54724	Caveolae-associated protein 1 OS=Mus musculus OX=10090 GN=Cavin1 PE=1 SV=1	630454	10563.3	10563.3	447774	221130	485615	10563.3	159521	10563.3	10563.3	1.21108e+06	10563.3	525722	10563.3	10563.3	10563.3	699244
Cavin2	Q63918	Caveolae-associated protein 2 OS=Mus musculus OX=10090 GN=Cavin2 PE=1 SV=3	615291	7.95829e+06	7.0827e+06	1.21857e+07	3.9148e+06	2.59072e+06	1.23179e+06	927557	3.34139e+06	3.32783e+06	1.82669e+07	869126	3.66308e+06	2.01441e+06	877581	4.74874e+06	9.69865e+06
Cbr1	P48758	Carbonyl reductase [NADPH] 1 OS=Mus musculus OX=10090 GN=Cbr1 PE=1 SV=3	10563.3	10563.3	10563.3	10563.3	10563.3	10563.3	10563.3	10563.3	10563.3	10563.3	10563.3	10563.3	10563.3	10563.3	1.43058e+06	10563.3	1.56805e+06
Cbr2	P08074	Carbonyl reductase [NADPH] 2 OS=Mus musculus OX=10090 GN=Cbr2 PE=1 SV=1	211750	10563.3	10563.3	10563.3	281316	10563.3	10563.3	10563.3	10563.3	468140	10563.3	10563.3	597052	793241	1.36516e+06	2.68805e+06	869168
Cbs	Q91WT9	Cystathionine beta-synthase OS=Mus musculus OX=10090 GN=Cbs PE=1 SV=3	10563.3	10563.3	10563.3	10563.3	10563.3	10563.3	10563.3	294146	10563.3	868360	10563.3	10563.3	2.95099e+06	7.24003e+06	10563.3	4.00562e+06	7.24548e+06
Ccar2	Q8VDP4	Cell cycle and apoptosis regulator protein 2 OS=Mus musculus OX=10090 GN=Ccar2 PE=1 SV=2	10563.3	10563.3	10563.3	10563.3	10563.3	10563.3	10563.3	10563.3	10563.3	10563.3	10563.3	10563.3	7.98735e+06	5.74828e+06	3.58803e+06	8.95036e+06	1.40684e+07
Ccdc171	E9Q1U1	Coiled-coil domain-containing protein 171 OS=Mus musculus OX=10090 GN=Ccdc171 PE=2 SV=1	2.54097e+06	1.63722e+06	1.73682e+06	1.48207e+06	2.45658e+06	3.5765e+06	7.53582e+06	2.66716e+06	7.9795e+06	2.83024e+06	2.65388e+06	5.19261e+06	10563.3	10563.3	10563.3	10563.3	10563.3
Ccdc27	Q3V036	Coiled-coil domain-containing protein 27 OS=Mus musculus OX=10090 GN=Ccdc27 PE=2 SV=1	10563.3	10563.3	10563.3	10563.3	10563.3	10563.3	10563.3	10563.3	10563.3	10563.3	10563.3	10563.3	10563.3	10563.3	10563.3	10563.3	10563.3
Ccl25	O35903	C-C motif chemokine 25 OS=Mus musculus OX=10090 GN=Ccl25 PE=2 SV=2	10563.3	10563.3	10563.3	10563.3	10563.3	10563.3	10563.3	10563.3	10563.3	568883	10563.3	10563.3	10563.3	10563.3	10563.3	10563.3	10563.3
Ccl8	Q9Z121	C-C motif chemokine 8 OS=Mus musculus OX=10090 GN=Ccl8 PE=3 SV=1	5.91466e+06	4.25002e+06	3.02847e+06	1.04478e+07	6.33449e+06	2.72532e+06	1.37749e+07	776709	1.4755e+07	2.5994e+06	2.41716e+06	2.90095e+06	311431	10563.3	370837	10563.3	10563.3
Ccl9	P51670	C-C motif chemokine 9 OS=Mus musculus OX=10090 GN=Ccl9 PE=1 SV=1	548045	387753	506292	766976	687170	1.0233e+06	1.41712e+06	10563.3	1.18807e+06	434529	549853	10563.3	2.22085e+06	1.46004e+06	2.1736e+06	1.67316e+06	1.25059e+06
Ccnf	P51944	Cyclin-F OS=Mus musculus OX=10090 GN=Ccnf PE=2 SV=2	8.39828e+06	4.37902e+06	5.84832e+06	8.29973e+06	1.06496e+07	6.55093e+06	4.31429e+06	2.58783e+06	2.6584e+06	4.02397e+06	4.15471e+06	4.25965e+06	10563.3	10563.3	10563.3	10563.3	10563.3
Cct2	P80314	T-complex protein 1 subunit beta OS=Mus musculus OX=10090 GN=Cct2 PE=1 SV=4	3.82342e+06	1.00876e+07	1.4542e+07	9.18255e+06	1.66002e+07	3.48462e+06	9.3593e+06	1.35873e+06	6.81338e+06	5.76964e+06	9.79172e+06	822124	676096	293900	258379	786044	1.09236e+06
Cct3	P80318	T-complex protein 1 subunit gamma OS=Mus musculus OX=10090 GN=Cct3 PE=1 SV=1	7.33654e+06	1.58228e+07	2.45511e+07	1.88504e+07	2.6648e+07	1.31473e+07	1.19969e+07	1.771e+06	9.48002e+06	1.27994e+07	1.62525e+07	2.62428e+06	2.07556e+06	1.97714e+06	381711	2.35651e+06	3.00226e+06
Cct4	P80315	T-complex protein 1 subunit delta OS=Mus musculus OX=10090 GN=Cct4 PE=1 SV=3	3.27608e+07	2.25231e+07	6.51681e+07	4.54538e+07	2.19484e+07	6.76646e+07	2.59131e+07	5.62087e+06	2.77184e+07	1.0314e+08	4.27959e+07	2.30057e+07	1.77838e+06	2.03082e+06	585056	1.62477e+06	3.38174e+06
Cct5	P80316	T-complex protein 1 subunit epsilon OS=Mus musculus OX=10090 GN=Cct5 PE=1 SV=1	4.7353e+06	1.24708e+07	2.20519e+07	1.51393e+07	2.07171e+07	1.18982e+07	8.71174e+06	2.65061e+06	7.09344e+06	7.57672e+06	1.55578e+07	4.19062e+06	3.36912e+06	2.55622e+06	2.80079e+06	3.16766e+06	3.13893e+06
Cct6a	P80317	T-complex protein 1 subunit zeta OS=Mus musculus OX=10090 GN=Cct6a PE=1 SV=3	4.45816e+06	1.07401e+07	1.30733e+07	1.02679e+07	1.88597e+07	4.11935e+06	7.04161e+06	1.53396e+06	4.39473e+06	8.61674e+06	1.19303e+07	269271	1.97602e+06	2.35248e+06	2.06375e+06	3.57815e+06	4.27805e+06
Cct7	P80313	T-complex protein 1 subunit eta OS=Mus musculus OX=10090 GN=Cct7 PE=1 SV=1	3.87567e+06	7.9066e+06	1.14958e+07	9.54602e+06	1.72712e+07	2.35983e+06	4.41532e+06	1.57129e+06	3.11509e+06	7.51001e+06	8.20388e+06	468865	848872	515484	88732.5	915625	1.39441e+06
Cct8	P42932	T-complex protein 1 subunit theta OS=Mus musculus OX=10090 GN=Cct8 PE=1 SV=3	1.21404e+07	1.51782e+07	2.80185e+07	2.58065e+07	3.78809e+07	1.36637e+07	1.3843e+07	1.09302e+07	1.47382e+07	1.36219e+07	2.83821e+07	4.8211e+06	3.21882e+06	1.45112e+06	10563.3	2.51777e+06	4.50485e+06
Cd109	Q8R422	CD109 antigen OS=Mus musculus OX=10090 GN=Cd109 PE=1 SV=1	2.41573e+07	3.04612e+07	6.04539e+07	6.63032e+07	6.08589e+07	9.32408e+07	3.40787e+07	8.72349e+06	7.29964e+06	6.74886e+07	7.8515e+07	5.65433e+07	1.22672e+07	1.31548e+07	7.55192e+06	1.48355e+07	1.61506e+07
Cd177	Q8R2S8	CD177 antigen OS=Mus musculus OX=10090 GN=Cd177 PE=2 SV=1	10563.3	10563.3	10563.3	10563.3	10563.3	10563.3	10563.3	10563.3	425479	10563.3	10563.3	10563.3	10563.3	10563.3	10563.3	10563.3	10563.3
Cd36	Q08857	Platelet glycoprotein 4 OS=Mus musculus OX=10090 GN=Cd36 PE=1 SV=2	10563.3	10563.3	10563.3	10563.3	489849	10563.3	206893	10563.3	417281	2.00502e+06	3.22364e+06	1.235e+06	2.13589e+06	1.24469e+06	827170	2.1025e+06	2.76702e+06
Cd5l	Q9QWK4	CD5 antigen-like OS=Mus musculus OX=10090 GN=Cd5l PE=1 SV=3	1.73819e+09	1.93768e+09	8.69152e+08	6.78956e+08	1.20299e+09	1.16151e+09	1.83648e+09	4.29039e+08	2.83273e+09	1.81329e+09	1.20104e+09	1.78016e+09	7.59964e+08	7.18012e+08	1.9005e+09	6.06937e+08	5.92038e+08
Cd74	P04441	H-2 class II histocompatibility antigen gamma chain OS=Mus musculus OX=10090 GN=Cd74 PE=1 SV=3	10563.3	10563.3	10563.3	10563.3	10563.3	10563.3	10563.3	10563.3	10563.3	10563.3	10563.3	10563.3	407026	201809	740180	486994	10563.3
Cd93	O89103	Complement component C1q receptor OS=Mus musculus OX=10090 GN=Cd93 PE=1 SV=1	814978	1.36172e+06	1.23224e+06	509221	947308	1.30693e+06	3.34286e+06	1.66627e+06	2.56107e+06	10563.3	10563.3	10563.3	10563.3	10563.3	1.44757e+06	10563.3	10563.3
Cdc42	P60766	Cell division control protein 42 homolog OS=Mus musculus OX=10090 GN=Cdc42 PE=1 SV=2	8.20656e+06	1.82376e+07	1.20699e+07	1.50762e+07	1.27991e+07	6.81771e+06	7.01311e+06	5.00287e+06	1.00864e+07	7.20147e+06	1.60601e+07	2.78505e+06	3.842e+06	1.95345e+06	3.55545e+06	4.30983e+06	1.21023e+07
Cdh1	P09803	Cadherin-1 OS=Mus musculus OX=10090 GN=Cdh1 PE=1 SV=1	4.16656e+06	3.54007e+06	6.22173e+06	5.45758e+06	3.91193e+06	3.36426e+06	1.35895e+07	2.39698e+06	8.74126e+06	1.00852e+07	3.34842e+06	6.58881e+06	5.8471e+06	8.97447e+06	1.41841e+07	3.74013e+06	4.09231e+06
Cdh5	P55284	Cadherin-5 OS=Mus musculus OX=10090 GN=Cdh5 PE=1 SV=2	10563.3	10563.3	10563.3	10563.3	10563.3	10563.3	10563.3	10563.3	10563.3	10563.3	10563.3	10563.3	10563.3	10563.3	1.16562e+06	10563.3	10563.3
Cdk16	Q04735	Cyclin-dependent kinase 16 OS=Mus musculus OX=10090 GN=Cdk16 PE=1 SV=1	10563.3	10563.3	10563.3	10563.3	10563.3	10563.3	10563.3	10563.3	10563.3	10563.3	10563.3	10563.3	10563.3	793193	10563.3	10563.3	696175
Cdk2	P97377	Cyclin-dependent kinase 2 OS=Mus musculus OX=10090 GN=Cdk2 PE=1 SV=2	791042	1.31678e+06	208435	834231	275167	10563.3	10563.3	305913	10563.3	10563.3	10563.3	10563.3	10563.3	10563.3	10563.3	10563.3	10563.3
Cdo1	P60334	Cysteine dioxygenase type 1 OS=Mus musculus OX=10090 GN=Cdo1 PE=1 SV=1	10563.3	10563.3	10563.3	10563.3	10563.3	10563.3	10563.3	10563.3	10563.3	10563.3	10563.3	10563.3	491513	691715	10563.3	455793	637279
Cela3b	Q9CQ52	Chymotrypsin-like elastase family member 3B OS=Mus musculus OX=10090 GN=Cela3b PE=1 SV=1	351823	234275	284963	10563.3	10563.3	374855	860871	10563.3	10563.3	1.81979e+06	1.18206e+06	633318	10563.3	10563.3	10563.3	10563.3	10563.3
Celsr3	Q91ZI0	Cadherin EGF LAG seven-pass G-type receptor 3 OS=Mus musculus OX=10090 GN=Celsr3 PE=2 SV=2	750166	522637	582304	771974	807467	1.02833e+06	610902	552011	616201	847551	962220	1.05661e+06	598276	804779	454031	571180	1.02811e+06
Cend1	Q9JKC6	Cell cycle exit and neuronal differentiation protein 1 OS=Mus musculus OX=10090 GN=Cend1 PE=1 SV=1	10563.3	408206	637299	1.65258e+06	627239	10563.3	10563.3	10563.3	10563.3	10563.3	10563.3	10563.3	10563.3	10563.3	10563.3	10563.3	10563.3
Cenpe	Q6RT24	Centromere-associated protein E OS=Mus musculus OX=10090 GN=Cenpe PE=1 SV=1	10563.3	10563.3	5.98762e+06	1.63943e+06	2.93948e+06	3.34634e+06	1.14178e+06	593933	10563.3	1.68874e+06	2.59725e+06	1.7189e+06	10563.3	10563.3	10563.3	10563.3	10563.3
Cenpu	Q8C4M7	Centromere protein U OS=Mus musculus OX=10090 GN=Cenpu PE=1 SV=2	10563.3	10563.3	10563.3	10563.3	10563.3	10563.3	10563.3	10563.3	10563.3	10563.3	10563.3	10563.3	6.00895e+06	5.73373e+06	4.68475e+06	7.99269e+06	9.17841e+06
Cep72	Q9D3R3	Centrosomal protein of 72 kDa OS=Mus musculus OX=10090 GN=Cep72 PE=1 SV=3	10563.3	10563.3	10563.3	10563.3	10563.3	10563.3	10563.3	10563.3	10563.3	10563.3	10563.3	10563.3	718673	1.1578e+06	507020	734388	600335
Ces1	Q8VCC2	Liver carboxylesterase 1 OS=Mus musculus OX=10090 GN=Ces1 PE=1 SV=1	10563.3	10563.3	468257	10563.3	246667	367834	689538	10563.3	1.12159e+06	832207	422802	753145	10563.3	10563.3	10563.3	10563.3	10563.3
Ces1c	P23953	Carboxylesterase 1C OS=Mus musculus OX=10090 GN=Ces1c PE=1 SV=4	6.12359e+08	2.74044e+08	2.96869e+08	2.77485e+08	3.48897e+08	2.85797e+08	3.50838e+08	2.81914e+08	4.38622e+08	2.3395e+08	3.48475e+08	5.24145e+08	1.98493e+08	3.34202e+08	8.31124e+08	2.0421e+08	1.67026e+08
Ces1d	Q8VCT4	Carboxylesterase 1D OS=Mus musculus OX=10090 GN=Ces1d PE=1 SV=1	10563.3	10563.3	10563.3	10563.3	10563.3	10563.3	10563.3	10563.3	10563.3	10563.3	10563.3	10563.3	1.11887e+06	4.06021e+06	316608	5.19298e+06	1.92782e+06
Ces2a	Q8QZR3	Pyrethroid hydrolase Ces2a OS=Mus musculus OX=10090 GN=Ces2a PE=1 SV=1	1.64433e+06	1.8427e+06	1.27162e+06	974417	348127	1.07177e+06	10563.3	10563.3	10563.3	10563.3	10563.3	10563.3	10563.3	10563.3	10563.3	10563.3	10563.3
Ces2c	Q91WG0	Acylcarnitine hydrolase OS=Mus musculus OX=10090 GN=Ces2c PE=1 SV=1	4.20644e+06	1.44086e+07	4.39264e+06	3.87015e+06	1.04688e+07	8.69063e+06	2.39514e+06	5.6348e+06	2.49192e+06	2.31163e+07	1.36218e+07	4.17569e+06	1.76123e+07	3.26276e+07	1.29199e+07	1.7476e+07	1.72891e+07
Ces2e	Q8BK48	Pyrethroid hydrolase Ces2e OS=Mus musculus OX=10090 GN=Ces2e PE=1 SV=1	2.99133e+07	2.62524e+07	2.21748e+07	2.47749e+07	1.56999e+07	1.94341e+07	1.16636e+07	4.03338e+07	4.35492e+07	7.21122e+06	2.02479e+07	2.08273e+07	1.79396e+07	1.89715e+07	1.96055e+07	2.68589e+07	3.23503e+07
Ces3a	Q63880	Carboxylesterase 3A OS=Mus musculus OX=10090 GN=Ces3a PE=1 SV=2	1.2425e+07	9.97867e+06	1.10816e+07	1.44718e+07	1.2815e+07	9.91544e+06	1.36954e+06	1.17727e+06	2.4877e+06	350648	3.32416e+06	797311	1.42911e+06	427513	10563.3	10563.3	10563.3
Cfap54	Q8C6S9	Cilia- and flagella-associated protein 54 OS=Mus musculus OX=10090 GN=Cfap54 PE=2 SV=4	4.072e+07	2.5778e+07	3.94373e+07	4.78395e+07	3.96331e+07	3.80252e+07	2.03564e+07	2.69967e+06	1.44457e+07	9.34594e+06	3.16766e+07	2.4894e+07	10563.3	10563.3	10563.3	10563.3	10563.3
Cfb	P04186	Complement factor B OS=Mus musculus OX=10090 GN=Cfb PE=1 SV=2	2.78747e+08	3.20105e+08	3.18694e+08	3.0987e+08	2.66401e+08	2.99398e+08	5.16277e+08	3.04754e+08	5.4687e+08	2.18692e+08	4.5e+08	4.67189e+08	7.50067e+08	4.59466e+08	6.9043e+08	7.69478e+08	6.62897e+08
Cfd	P03953	Complement factor D OS=Mus musculus OX=10090 GN=Cfd PE=1 SV=1	7.48661e+07	7.47231e+07	6.26041e+07	5.5549e+07	6.80388e+07	6.6323e+07	1.53934e+06	2.30611e+06	1.10188e+06	3.2365e+06	1.19284e+06	945630	5.65865e+06	3.80327e+06	1.00641e+07	1.51122e+06	1.2107e+06
Cfdp1	O88271	Craniofacial development protein 1 OS=Mus musculus OX=10090 GN=Cfdp1 PE=1 SV=1	10563.3	10563.3	10563.3	10563.3	10563.3	10563.3	10563.3	10563.3	10563.3	10563.3	10563.3	10563.3	2.87474e+08	3.1028e+08	3.21297e+08	3.29801e+08	3.02235e+08
Cfh	P06909	Complement factor H OS=Mus musculus OX=10090 GN=Cfh PE=1 SV=2	1.1726e+10	1.16224e+10	1.37379e+10	1.72535e+10	1.55724e+10	1.59707e+10	2.04713e+10	8.30761e+09	2.04667e+10	1.3149e+10	1.5555e+10	1.41413e+10	5.52395e+09	4.64663e+09	4.17211e+09	6.17088e+09	5.52068e+09
Cfi	Q61129	Complement factor I OS=Mus musculus OX=10090 GN=Cfi PE=1 SV=3	2.87704e+08	2.46176e+08	3.24012e+08	3.47456e+08	2.0467e+08	3.44023e+08	3.42494e+08	1.65135e+08	4.3394e+08	2.93635e+08	4.90652e+08	4.87796e+08	9.75437e+07	8.57021e+07	1.48917e+08	1.01535e+08	6.28609e+07
Cfl1	P18760	Cofilin-1 OS=Mus musculus OX=10090 GN=Cfl1 PE=1 SV=3	3.5616e+07	9.0699e+07	4.86549e+07	7.7952e+07	5.14937e+07	4.13209e+07	7.58927e+07	3.63806e+07	6.94596e+07	6.06875e+07	8.69418e+07	2.12233e+07	4.28858e+07	1.27382e+07	4.17413e+07	4.37159e+07	6.35842e+07
Cfp	P11680	Properdin OS=Mus musculus OX=10090 GN=Cfp PE=1 SV=2	1.81082e+08	2.47619e+08	5.21995e+08	4.83573e+08	5.25835e+08	5.449e+08	5.73402e+08	8.75903e+07	7.40031e+08	3.37681e+08	3.785e+08	2.93193e+08	5.85601e+07	5.95418e+07	7.2727e+07	4.95186e+07	4.48244e+07
Cgref1	Q8R1U2	Cell growth regulator with EF hand domain protein 1 OS=Mus musculus OX=10090 GN=Cgref1 PE=1 SV=1	9.27828e+06	8.11038e+06	6.14912e+06	4.70559e+06	4.41615e+06	5.84448e+06	1.30205e+07	6.6756e+06	7.31362e+06	1.19803e+07	7.2358e+06	3.70113e+06	1.62008e+07	9.25469e+06	1.61953e+07	2.08369e+07	2.49811e+07
Chga	P26339	Chromogranin-A OS=Mus musculus OX=10090 GN=Chga PE=1 SV=1	1.7015e+07	2.21393e+07	1.14364e+07	1.82452e+07	6.0652e+06	1.5263e+07	1.45179e+07	1.11488e+07	1.11085e+07	1.77346e+07	1.26158e+07	3.05863e+06	1.11559e+07	4.90104e+06	3.00591e+06	8.41278e+06	7.43e+06
Chgb	P16014	Secretogranin-1 OS=Mus musculus OX=10090 GN=Chgb PE=1 SV=2	1.15839e+07	9.52689e+06	968813	1.59021e+06	4.99305e+06	10563.3	5.51143e+06	286819	8.05745e+06	8.83352e+06	392090	1.27177e+07	10563.3	10563.3	10563.3	10563.3	10563.3
Chia	Q91XA9	Acidic mammalian chitinase OS=Mus musculus OX=10090 GN=Chia PE=1 SV=2	1.14089e+06	3.48895e+06	943826	1.77142e+06	10563.3	2.85055e+06	1.63973e+06	1.06308e+06	352873	2.20116e+06	1.96312e+06	1.55008e+06	1.65651e+06	3.06096e+06	2.35501e+06	7.92702e+06	1.89787e+06
Chil3	O35744	Chitinase-like protein 3 OS=Mus musculus OX=10090 GN=Chil3 PE=1 SV=2	10563.3	10563.3	10563.3	10563.3	10563.3	10563.3	10563.3	10563.3	794530	10563.3	10563.3	10563.3	10563.3	10563.3	10563.3	10563.3	10563.3
Chmp2a	Q9DB34	Charged multivesicular body protein 2a OS=Mus musculus OX=10090 GN=Chmp2a PE=1 SV=1	10563.3	340312	10563.3	10563.3	185391	415325	10563.3	249197	331721	10563.3	10563.3	10563.3	10563.3	10563.3	10563.3	10563.3	10563.3
Chmp7	Q8R1T1	Charged multivesicular body protein 7 OS=Mus musculus OX=10090 GN=Chmp7 PE=1 SV=1	10563.3	10563.3	10563.3	315586	10563.3	10563.3	10563.3	10563.3	10563.3	10563.3	255412	477542	10563.3	10563.3	10563.3	10563.3	10563.3
Chst12	Q99LL3	Carbohydrate sulfotransferase 12 OS=Mus musculus OX=10090 GN=Chst12 PE=2 SV=2	10563.3	417910	281521	253077	10563.3	282895	250792	10563.3	319472	570058	384446	10563.3	477492	434986	10563.3	391725	570051
Cilp	Q66K08	Cartilage intermediate layer protein 1 OS=Mus musculus OX=10090 GN=Cilp PE=1 SV=1	183076	94072.1	10563.3	10563.3	10563.3	152561	10563.3	621579	219919	168972	1.21747e+06	1.54197e+06	10563.3	842929	10563.3	10563.3	10563.3
Cir1	Q9DA19	Corepressor interacting with RBPJ 1 OS=Mus musculus OX=10090 GN=Cir1 PE=1 SV=2	10563.3	10563.3	10563.3	10563.3	10563.3	10563.3	10563.3	10563.3	10563.3	10563.3	10563.3	10563.3	10563.3	10563.3	724389	10563.3	10563.3
Ckb	Q04447	Creatine kinase B-type OS=Mus musculus OX=10090 GN=Ckb PE=1 SV=1	3.59709e+06	1.48159e+07	7.94073e+06	3.12014e+07	5.54786e+06	3.75198e+06	8.99488e+06	6.21458e+06	5.27567e+06	1.62073e+07	1.73209e+07	4.90206e+06	8.17915e+07	8.88358e+07	5.14084e+07	5.89372e+07	8.23086e+07
Ckm	P07310	Creatine kinase M-type OS=Mus musculus OX=10090 GN=Ckm PE=1 SV=1	5.02234e+07	5.38751e+07	2.63489e+07	7.00905e+07	6.47121e+07	3.54457e+07	2.33916e+07	2.54181e+07	2.20536e+07	4.90969e+07	3.63984e+07	1.21788e+07	1.35043e+07	247934	855983	8.58554e+06	1.93868e+07
Ckmt1	P30275	Creatine kinase U-type, mitochondrial OS=Mus musculus OX=10090 GN=Ckmt1 PE=1 SV=1	6.61243e+07	3.7923e+07	1.64578e+07	2.11292e+07	2.18204e+07	2.44838e+07	5.23909e+07	3.49848e+07	1.65284e+08	6.6033e+07	1.82267e+07	3.51758e+07	10563.3	10563.3	10563.3	10563.3	10563.3
Ckmt2	Q6P8J7	Creatine kinase S-type, mitochondrial OS=Mus musculus OX=10090 GN=Ckmt2 PE=1 SV=1	10563.3	551629	10563.3	10563.3	10563.3	10563.3	10563.3	10563.3	10563.3	10563.3	10563.3	10563.3	10563.3	10563.3	10563.3	10563.3	10563.3
Clasp1	Q80TV8	CLIP-associating protein 1 OS=Mus musculus OX=10090 GN=Clasp1 PE=1 SV=2	10563.3	10563.3	1.06155e+07	8.79226e+06	10563.3	1.10475e+07	1.52046e+07	10563.3	3.18999e+06	3.57795e+06	3.76445e+06	3.14869e+06	10563.3	10563.3	10563.3	10563.3	10563.3
Clca3a1	Q9QX15	Calcium-activated chloride channel regulator 3A-1 OS=Mus musculus OX=10090 GN=Clca3a1 PE=1 SV=1	2.83577e+06	1.34625e+06	1.12482e+06	1.78605e+06	1.33414e+06	1.18694e+06	904831	10563.3	826731	1.94572e+06	2.02056e+06	2.06627e+06	519730	510342	720218	660207	256748
Cldn11	Q60771	Claudin-11 OS=Mus musculus OX=10090 GN=Cldn11 PE=1 SV=1	10563.3	10563.3	10563.3	1.66729e+06	10563.3	10563.3	2.46853e+06	277385	979107	657588	10563.3	10563.3	10563.3	10563.3	10563.3	10563.3	10563.3
Clec11a	O88200	C-type lectin domain family 11 member A OS=Mus musculus OX=10090 GN=Clec11a PE=1 SV=1	3.00907e+07	2.76342e+07	2.6719e+07	3.80168e+07	3.78929e+07	4.19858e+07	1.71745e+07	1.45696e+07	8.74405e+06	1.77807e+07	1.1668e+07	1.0104e+07	1.03006e+07	1.3426e+07	1.48136e+07	1.19633e+07	7.00571e+06
Clec3b	P43025	Tetranectin OS=Mus musculus OX=10090 GN=Clec3b PE=1 SV=2	2.36276e+07	2.32962e+07	2.5684e+07	5.17811e+07	2.40195e+07	4.89575e+07	1.13179e+07	3.91898e+06	8.32457e+06	1.73896e+07	1.73101e+07	1.02686e+07	8.19929e+06	6.3765e+06	5.38063e+06	9.19515e+06	10563.3
Clec4f	P70194	C-type lectin domain family 4 member F OS=Mus musculus OX=10090 GN=Clec4f PE=1 SV=1	6.71563e+06	5.68527e+06	8.55914e+06	4.17429e+06	8.93166e+06	1.03216e+07	3.64937e+07	1.76922e+07	3.37104e+07	1.26387e+07	2.14171e+07	8.39149e+06	2.78962e+08	1.22064e+08	8.17217e+07	1.41936e+08	1.87555e+08
Clhc1	Q5M6W3	Clathrin heavy chain linker domain-containing protein 1 OS=Mus musculus OX=10090 GN=Clhc1 PE=2 SV=1	1.45631e+08	3.72243e+08	6.3292e+08	4.94487e+08	3.17476e+07	5.15547e+08	5.1541e+08	6.94813e+06	4.77133e+08	8.51454e+08	5.85146e+08	3.86208e+08	10563.3	10563.3	10563.3	10563.3	10563.3
Clic1	Q9Z1Q5	Chloride intracellular channel protein 1 OS=Mus musculus OX=10090 GN=Clic1 PE=1 SV=3	8.05497e+06	1.94979e+07	1.40602e+07	1.11438e+07	1.01199e+07	8.57232e+06	1.00761e+07	1.02203e+07	9.58788e+06	1.3369e+07	2.66449e+07	2.30812e+06	6.97952e+06	1.19741e+06	9.85323e+06	1.31401e+07	1.76616e+07
Clic4	Q9QYB1	Chloride intracellular channel protein 4 OS=Mus musculus OX=10090 GN=Clic4 PE=1 SV=3	542700	691886	404072	474580	311644	304362	409606	364934	290326	356748	411183	10563.3	10563.3	10563.3	10563.3	10563.3	10563.3
Clstn1	Q9EPL2	Calsyntenin-1 OS=Mus musculus OX=10090 GN=Clstn1 PE=1 SV=1	1.69247e+07	1.0408e+07	6.3942e+06	1.9146e+07	3.51333e+07	6.47522e+06	8.51471e+06	2.41138e+07	1.74419e+07	6.35286e+07	5.26149e+06	1.11449e+07	686951	10563.3	10563.3	1.52517e+06	735144
Clstn3	Q99JH7	Calsyntenin-3 OS=Mus musculus OX=10090 GN=Clstn3 PE=1 SV=1	10563.3	10563.3	10563.3	10563.3	10563.3	10563.3	10563.3	10563.3	439043	349597	10563.3	10563.3	10563.3	10563.3	10563.3	10563.3	10563.3
Clta	O08585	Clathrin light chain A OS=Mus musculus OX=10090 GN=Clta PE=1 SV=2	10563.3	10563.3	10563.3	1.11395e+06	721411	451367	452415	413041	10563.3	281907	708453	10563.3	10563.3	505955	10563.3	408847	446340
Cltb	Q6IRU5	Clathrin light chain B OS=Mus musculus OX=10090 GN=Cltb PE=1 SV=1	274876	574421	305651	1.38334e+06	373985	10563.3	10563.3	410956	383775	578247	290949	170288	10563.3	10563.3	10563.3	10563.3	10563.3
Cltc	Q68FD5	Clathrin heavy chain 1 OS=Mus musculus OX=10090 GN=Cltc PE=1 SV=3	5.8457e+06	7.52659e+06	1.57188e+07	3.24081e+07	5.76506e+06	4.84622e+06	1.66127e+07	2.76541e+06	1.82943e+07	1.26293e+07	1.50158e+07	8.12726e+06	4.24418e+06	1.30975e+07	1.68763e+06	7.50138e+06	1.12165e+07
Clu	Q06890	Clusterin OS=Mus musculus OX=10090 GN=Clu PE=1 SV=1	1.08788e+10	1.20171e+10	1.18269e+10	1.06676e+10	1.04892e+10	1.1298e+10	1.14957e+10	1.38618e+10	1.04302e+10	1.03893e+10	9.9147e+09	9.49084e+09	1.13061e+10	1.0276e+10	1.08142e+10	1.16339e+10	1.19209e+10
Cndp2	Q9D1A2	Cytosolic non-specific dipeptidase OS=Mus musculus OX=10090 GN=Cndp2 PE=1 SV=1	9.91024e+06	1.40317e+07	9.13239e+06	4.48185e+06	8.51565e+06	1.0542e+07	6.72447e+06	1.33771e+06	6.73473e+06	6.41319e+06	9.2582e+06	5.55619e+06	2.58468e+06	2.56018e+06	1.70635e+06	2.21254e+06	2.6736e+06
Cnn1	Q08091	Calponin-1 OS=Mus musculus OX=10090 GN=Cnn1 PE=1 SV=1	3.9474e+06	6.64788e+06	5.13546e+06	7.26127e+06	7.69249e+06	6.25749e+06	5.01638e+06	174096	4.57574e+06	6.36113e+06	5.47456e+06	4.60774e+06	9.05158e+06	9.47634e+06	3.97911e+06	1.02417e+07	4.62596e+06
Cnn2	Q08093	Calponin-2 OS=Mus musculus OX=10090 GN=Cnn2 PE=1 SV=1	1.98094e+06	660557	1.31886e+07	9.46878e+06	10563.3	10563.3	10563.3	10563.3	496906	3.09867e+06	2.68361e+06	3.45653e+06	10563.3	10563.3	10563.3	10563.3	10563.3
Cnp	P16330	2',3'-cyclic-nucleotide 3'-phosphodiesterase OS=Mus musculus OX=10090 GN=Cnp PE=1 SV=3	498866	419049	799971	1.38943e+07	1.12598e+06	10563.3	2.1078e+06	1.12292e+06	10563.3	1.94249e+06	1.34471e+06	286616	764248	950388	1.76318e+06	569348	691668
Cntf	P51642	Ciliary neurotrophic factor OS=Mus musculus OX=10090 GN=Cntf PE=2 SV=1	421372	10563.3	3.8165e+06	3.2868e+06	2.14355e+06	3.71759e+06	1.52213e+06	446704	1.12744e+06	2.36769e+06	2.01779e+06	3.24266e+06	2.39254e+06	2.55011e+06	2.40666e+06	3.53861e+06	10563.3
Col11a2	Q64739	Collagen alpha-2(XI) chain OS=Mus musculus OX=10090 GN=Col11a2 PE=2 SV=3	10563.3	10563.3	10563.3	10563.3	10563.3	10563.3	10563.3	10563.3	10563.3	10563.3	10563.3	10563.3	691409	456040	10563.3	647425	475067
Col12a1	Q60847	Collagen alpha-1(XII) chain OS=Mus musculus OX=10090 GN=Col12a1 PE=2 SV=3	4.39873e+06	6.53443e+06	3.10701e+06	5.38566e+06	3.97331e+06	4.32313e+06	1.54462e+06	2.30934e+06	334992	3.5356e+06	5.88545e+06	1.257e+06	3.15349e+06	1.93541e+06	2.20421e+06	1.70934e+06	2.67017e+06
Col15a1	O35206	Collagen alpha-1(XV) chain OS=Mus musculus OX=10090 GN=Col15a1 PE=1 SV=2	330175	10563.3	285261	10563.3	892134	10563.3	1.30965e+06	2.32438e+06	3.43979e+06	176600	654943	800349	10563.3	10563.3	10563.3	10563.3	10563.3
Col18a1	P39061	Collagen alpha-1(XVIII) chain OS=Mus musculus OX=10090 GN=Col18a1 PE=1 SV=4	6.94367e+06	5.72591e+06	5.48062e+06	5.72504e+06	6.06441e+06	4.33359e+06	1.76305e+07	7.76055e+06	1.49768e+07	4.43371e+06	8.70448e+06	9.7667e+06	1.21688e+07	3.09234e+06	2.48607e+07	9.50726e+06	1.03116e+07
Col1a1	P11087	Collagen alpha-1(I) chain OS=Mus musculus OX=10090 GN=Col1a1 PE=1 SV=4	1.91965e+06	1.24517e+06	1.24549e+06	3.1589e+06	2.34377e+06	2.81202e+06	541753	998338	10563.3	765170	1.3429e+06	459443	10563.3	10563.3	584067	540495	10563.3
Col2a1	P28481	Collagen alpha-1(II) chain OS=Mus musculus OX=10090 GN=Col2a1 PE=1 SV=2	10563.3	10563.3	10563.3	10563.3	10563.3	10563.3	10563.3	10563.3	10563.3	10563.3	10563.3	10563.3	2.26946e+06	1.01807e+06	579102	1.41655e+06	1.98985e+06
Col5a1	O88207	Collagen alpha-1(V) chain OS=Mus musculus OX=10090 GN=Col5a1 PE=1 SV=2	10563.3	10563.3	10563.3	10563.3	10563.3	10563.3	10563.3	10563.3	10563.3	3.31652e+06	427865	411718	10563.3	10563.3	10563.3	10563.3	10563.3
Col5a2	Q3U962	Collagen alpha-2(V) chain OS=Mus musculus OX=10090 GN=Col5a2 PE=1 SV=1	10563.3	10563.3	10563.3	10563.3	10563.3	10563.3	10563.3	762627	10563.3	10563.3	478261	674899	10563.3	10563.3	10563.3	10563.3	10563.3
Colec10	Q8CF98	Collectin-10 OS=Mus musculus OX=10090 GN=Colec10 PE=2 SV=1	1.42223e+07	2.40627e+07	1.81141e+07	1.11229e+07	1.235e+07	1.74806e+07	1.09361e+07	1.2278e+07	1.21917e+07	1.50227e+07	1.9975e+07	1.87108e+07	5.06299e+07	3.87862e+07	3.51296e+07	4.99407e+07	5.76862e+07
Colec11	Q3SXB8	Collectin-11 OS=Mus musculus OX=10090 GN=Colec11 PE=2 SV=2	2.47145e+07	3.19076e+07	2.21725e+07	1.34447e+07	1.06426e+07	2.22194e+07	1.2577e+07	2.42543e+07	1.0968e+07	1.78621e+07	2.53481e+07	2.41651e+07	5.51511e+07	5.80503e+07	4.31877e+07	5.83881e+07	6.48644e+07
Comp	Q9R0G6	Cartilage oligomeric matrix protein OS=Mus musculus OX=10090 GN=Comp PE=1 SV=2	7.59947e+06	7.95184e+06	380353	3.06333e+06	1.3178e+06	2.35344e+06	3.76164e+06	1.28685e+06	1.27979e+06	5.35306e+06	2.01708e+06	3.65619e+06	1.99713e+06	2.82099e+06	403156	1.81856e+06	2.76236e+06
Comt	O88587	Catechol O-methyltransferase OS=Mus musculus OX=10090 GN=Comt PE=1 SV=2	4.43467e+06	3.89575e+06	4.39642e+06	3.08838e+06	2.21216e+06	3.56848e+06	4.20002e+06	2.78548e+06	4.88781e+06	3.86831e+06	3.41521e+06	4.66239e+06	10563.3	10563.3	10563.3	10563.3	10563.3
Copa	Q8CIE6	Coatomer subunit alpha OS=Mus musculus OX=10090 GN=Copa PE=1 SV=2	10563.3	373723	380466	10563.3	10563.3	10563.3	138499	189055	10563.3	10563.3	10563.3	10563.3	172930	10563.3	10563.3	186417	353118
Copb1	Q9JIF7	Coatomer subunit beta OS=Mus musculus OX=10090 GN=Copb1 PE=1 SV=1	658072	783486	1.39396e+06	903924	10563.3	1.17895e+06	4.79184e+06	10563.3	1.74371e+06	10563.3	575420	10563.3	10563.3	10563.3	10563.3	10563.3	10563.3
Copg1	Q9QZE5	Coatomer subunit gamma-1 OS=Mus musculus OX=10090 GN=Copg1 PE=1 SV=1	10563.3	10563.3	10563.3	10563.3	10563.3	10563.3	10563.3	10563.3	10563.3	10563.3	10563.3	10563.3	10563.3	10563.3	10563.3	10563.3	10563.3
Cops2	P61202	COP9 signalosome complex subunit 2 OS=Mus musculus OX=10090 GN=Cops2 PE=1 SV=1	2.65351e+06	3.10812e+06	2.37275e+06	2.56622e+06	3.55507e+06	3.11858e+06	1.63285e+06	1.39149e+06	5.2075e+06	2.42662e+06	2.88207e+06	1.47026e+06	1.5729e+06	695485	1.05784e+06	751383	288865
Cops3	O88543	COP9 signalosome complex subunit 3 OS=Mus musculus OX=10090 GN=Cops3 PE=1 SV=3	5.97689e+06	1.19569e+07	2.0891e+07	1.61177e+07	4.00835e+06	1.48074e+07	1.92178e+07	2.26306e+06	1.23126e+07	1.92854e+07	1.67964e+07	7.24724e+06	305784	1.97596e+06	459429	1.21248e+06	2.12639e+06
Cops4	O88544	COP9 signalosome complex subunit 4 OS=Mus musculus OX=10090 GN=Cops4 PE=1 SV=1	3.25102e+06	3.43584e+06	3.83805e+06	3.27719e+06	8.28481e+06	4.68902e+06	1.44307e+06	4.0579e+06	4.21427e+06	2.38175e+06	2.289e+06	627510	2.76259e+06	3.51671e+06	2.3722e+06	3.14737e+06	4.05053e+06
Cops5	O35864	COP9 signalosome complex subunit 5 OS=Mus musculus OX=10090 GN=Cops5 PE=1 SV=3	1.44119e+06	2.19612e+06	2.4364e+06	3.56244e+06	4.19069e+06	2.8833e+06	1.0485e+06	1.00428e+06	475093	1.37942e+06	1.59406e+06	406498	627404	660305	159648	1.45198e+06	2.09965e+06
Cops6	O88545	COP9 signalosome complex subunit 6 OS=Mus musculus OX=10090 GN=Cops6 PE=1 SV=1	10563.3	381348	10563.3	573954	810127	400555	10563.3	10563.3	10563.3	10563.3	379919	10563.3	10563.3	10563.3	10563.3	10563.3	10563.3
Cops7a	Q9CZ04	COP9 signalosome complex subunit 7a OS=Mus musculus OX=10090 GN=Cops7a PE=1 SV=2	10563.3	321546	406028	482276	659414	552453	346283	1.29286e+06	327848	403741	10563.3	10563.3	10563.3	745645	10563.3	353480	1.87347e+06
Cops8	Q8VBV7	COP9 signalosome complex subunit 8 OS=Mus musculus OX=10090 GN=Cops8 PE=1 SV=1	441390	600612	689956	594467	1.4371e+06	1.26407e+06	10563.3	891820	10563.3	421092	981938	10563.3	578730	639521	10563.3	728910	1.6247e+06
Coro1a	O89053	Coronin-1A OS=Mus musculus OX=10090 GN=Coro1a PE=1 SV=5	7.87028e+06	1.29338e+07	1.64015e+07	1.71442e+07	9.79371e+06	1.13098e+07	7.74249e+06	4.4855e+06	1.13566e+07	1.02039e+07	1.65391e+07	2.44008e+06	6.21688e+06	2.73176e+06	5.10524e+06	8.04935e+06	9.57571e+06
Coro1b	Q9WUM3	Coronin-1B OS=Mus musculus OX=10090 GN=Coro1b PE=1 SV=1	3.08992e+06	1.10243e+07	5.70216e+06	4.15116e+06	2.03083e+06	2.56152e+06	2.30847e+06	2.37364e+06	801985	2.07587e+06	5.08408e+06	762131	1.06129e+08	9.12091e+07	7.85747e+07	1.20013e+08	6.88832e+07
Coro1c	Q9WUM4	Coronin-1C OS=Mus musculus OX=10090 GN=Coro1c PE=1 SV=2	8.97804e+06	1.21376e+07	1.52797e+07	8.35633e+06	8.32903e+06	1.87057e+07	4.8925e+06	5.84057e+06	3.13122e+06	4.35277e+06	4.875e+06	2.07889e+06	470088	10563.3	449459	311923	912163
Coro7	Q9D2V7	Coronin-7 OS=Mus musculus OX=10090 GN=Coro7 PE=1 SV=2	10563.3	10563.3	10563.3	10563.3	10563.3	10563.3	10563.3	10563.3	10563.3	10563.3	10563.3	10563.3	619789	641403	179102	754200	1.16768e+06
Cox4i1	P19783	Cytochrome c oxidase subunit 4 isoform 1, mitochondrial OS=Mus musculus OX=10090 GN=Cox4i1 PE=1 SV=2	266430	314761	974134	4.53236e+06	1.01141e+06	457740	814943	10563.3	402696	1.77048e+06	10563.3	870111	10563.3	10563.3	10563.3	10563.3	10563.3
Cox5a	P12787	Cytochrome c oxidase subunit 5A, mitochondrial OS=Mus musculus OX=10090 GN=Cox5a PE=1 SV=2	10563.3	10563.3	10563.3	520088	10563.3	10563.3	10563.3	10563.3	10563.3	10563.3	10563.3	10563.3	10563.3	10563.3	10563.3	10563.3	10563.3
Cox5b	P19536	Cytochrome c oxidase subunit 5B, mitochondrial OS=Mus musculus OX=10090 GN=Cox5b PE=1 SV=1	1.4507e+06	1.35977e+06	1.16489e+06	1.30813e+06	1.17875e+06	1.20634e+06	729741	641292	544208	672471	945311	593201	10563.3	10563.3	10563.3	10563.3	10563.3
Cox6b1	P56391	Cytochrome c oxidase subunit 6B1 OS=Mus musculus OX=10090 GN=Cox6b1 PE=1 SV=2	10563.3	10563.3	10563.3	667702	10563.3	10563.3	10563.3	10563.3	10563.3	195964	10563.3	10563.3	10563.3	10563.3	284815	10563.3	10563.3
Cox6c	Q9CPQ1	Cytochrome c oxidase subunit 6C OS=Mus musculus OX=10090 GN=Cox6c PE=1 SV=3	10563.3	10563.3	10563.3	1.35558e+06	10563.3	10563.3	10563.3	10563.3	10563.3	10563.3	10563.3	10563.3	1.0464e+06	144983	4.33957e+06	376437	739874
Cox7a2	P48771	Cytochrome c oxidase subunit 7A2, mitochondrial OS=Mus musculus OX=10090 GN=Cox7a2 PE=1 SV=2	10563.3	10563.3	10563.3	2.18047e+06	10563.3	10563.3	457545	285368	10563.3	1.1569e+06	10563.3	10563.3	10563.3	10563.3	10563.3	10563.3	10563.3
Cp	Q61147	Ceruloplasmin OS=Mus musculus OX=10090 GN=Cp PE=1 SV=2	1.62349e+10	1.45048e+10	1.10662e+10	8.91718e+09	1.02235e+10	9.90725e+09	5.2535e+09	6.65819e+09	8.02734e+09	3.69291e+09	9.69176e+09	7.42505e+09	1.05146e+10	5.53629e+09	5.52409e+09	7.91014e+09	1.13747e+10
Cpa1	Q7TPZ8	Carboxypeptidase A1 OS=Mus musculus OX=10090 GN=Cpa1 PE=1 SV=1	10563.3	10563.3	10563.3	10563.3	10563.3	10563.3	647332	10563.3	10563.3	10563.3	10563.3	10563.3	10563.3	10563.3	10563.3	10563.3	10563.3
Cpb2	Q9JHH6	Carboxypeptidase B2 OS=Mus musculus OX=10090 GN=Cpb2 PE=1 SV=1	2.18329e+08	2.95953e+08	1.38909e+08	1.1285e+08	7.9761e+07	1.20073e+08	2.24705e+08	9.57244e+07	1.25037e+08	1.37642e+08	7.37035e+07	4.8047e+07	1.80374e+08	1.09912e+08	1.75071e+08	1.23187e+08	3.64779e+08
Cpe	Q00493	Carboxypeptidase E OS=Mus musculus OX=10090 GN=Cpe PE=1 SV=2	1.24644e+06	798180	1.28863e+06	887254	945445	1.17901e+06	10563.3	270580	10563.3	415686	837333	214035	10563.3	10563.3	10563.3	10563.3	10563.3
Cpn1	Q9JJN5	Carboxypeptidase N catalytic chain OS=Mus musculus OX=10090 GN=Cpn1 PE=1 SV=1	2.04101e+09	2.21542e+09	1.84037e+09	2.12109e+09	1.73184e+09	1.62925e+09	9.73504e+08	1.33367e+09	7.45559e+08	1.63639e+09	1.63647e+09	2.06974e+09	2.26114e+09	1.99092e+09	1.46468e+09	2.31485e+09	2.19107e+09
Cpn2	Q9DBB9	Carboxypeptidase N subunit 2 OS=Mus musculus OX=10090 GN=Cpn2 PE=1 SV=2	4.56594e+09	4.68925e+09	4.67566e+09	5.15428e+09	5.20485e+09	4.26637e+09	1.89691e+09	3.74127e+09	1.62424e+09	3.45931e+09	4.17954e+09	4.72577e+09	3.92113e+09	3.71105e+09	2.49666e+09	3.84469e+09	3.99225e+09
Cpox	P36552	Oxygen-dependent coproporphyrinogen-III oxidase, mitochondrial OS=Mus musculus OX=10090 GN=Cpox PE=1 SV=2	10563.3	10563.3	10563.3	217517	216934	237253	10563.3	318208	303779	241682	10563.3	10563.3	10563.3	10563.3	10563.3	10563.3	10563.3
Cpq	Q9WVJ3	Carboxypeptidase Q OS=Mus musculus OX=10090 GN=Cpq PE=1 SV=1	2.16721e+06	3.30261e+06	1.43132e+06	2.95768e+06	4.60107e+06	3.90477e+06	2.23393e+06	3.32593e+06	1.9957e+06	1.95737e+06	3.90387e+06	936318	3.49394e+06	5.15393e+06	6.07444e+06	3.65153e+06	6.71038e+06
Cps1	Q8C196	Carbamoyl-phosphate synthase [ammonia], mitochondrial OS=Mus musculus OX=10090 GN=Cps1 PE=1 SV=2	3.36942e+06	4.9195e+06	5.81677e+06	6.89084e+06	2.03015e+07	4.62526e+06	2.22023e+07	1.60236e+07	4.42997e+07	1.82397e+08	1.9832e+07	9.38108e+06	6.94905e+06	2.18313e+07	742311	4.07929e+07	5.2434e+07
Crebrf	Q8CDG5	CREB3 regulatory factor OS=Mus musculus OX=10090 GN=Crebrf PE=2 SV=1	908984	976425	1.84292e+06	820239	1.31032e+06	2.57078e+06	1.88007e+06	10563.3	2.42147e+06	601279	1.88274e+06	1.64411e+06	10563.3	10563.3	10563.3	10563.3	10563.3
Creg1	O88668	Protein CREG1 OS=Mus musculus OX=10090 GN=Creg1 PE=1 SV=1	834636	919784	1.72188e+06	568227	643634	10563.3	450633	2.87045e+06	642507	425600	10563.3	341501	10563.3	10563.3	10563.3	10563.3	10563.3
Crip1	P63254	Cysteine-rich protein 1 OS=Mus musculus OX=10090 GN=Crip1 PE=1 SV=2	1.53161e+06	686801	933454	677192	10563.3	964991	761209	10563.3	1.0901e+06	1.40946e+06	4.95786e+06	841430	10563.3	10563.3	10563.3	10563.3	10563.3
Crisp1	Q03401	Cysteine-rich secretory protein 1 OS=Mus musculus OX=10090 GN=Crisp1 PE=2 SV=1	1.24008e+07	1.66734e+07	1.24918e+07	1.17978e+07	2.00834e+07	3.94574e+07	2.63714e+06	698073	1.86954e+06	7.78705e+06	9.87282e+06	3.75938e+06	1.28374e+06	3.38407e+06	1.70607e+06	6.53245e+06	1.33237e+06
Crlf3	Q9Z2L7	Cytokine receptor-like factor 3 OS=Mus musculus OX=10090 GN=Crlf3 PE=1 SV=1	10563.3	324262	439841	10563.3	10563.3	10563.3	10563.3	10563.3	10563.3	298597	273574	10563.3	10563.3	10563.3	10563.3	10563.3	10563.3
Crmp1	P97427	Dihydropyrimidinase-related protein 1 OS=Mus musculus OX=10090 GN=Crmp1 PE=1 SV=1	10563.3	10563.3	10563.3	1.8196e+06	10563.3	10563.3	174500	277051	10563.3	310644	10563.3	10563.3	10563.3	10563.3	10563.3	10563.3	10563.3
Crp	P14847	C-reactive protein OS=Mus musculus OX=10090 GN=Crp PE=1 SV=2	1.9823e+07	7.03938e+06	1.13711e+07	1.46349e+07	1.39027e+07	2.43699e+07	3.40211e+07	1.24019e+07	4.07648e+07	2.34466e+07	3.22748e+07	3.98816e+07	4.78272e+07	4.25982e+07	1.01546e+08	3.48289e+07	3.02846e+07
Cryab	P23927	Alpha-crystallin B chain OS=Mus musculus OX=10090 GN=Cryab PE=1 SV=2	3.01396e+06	3.22045e+06	667043	3.17696e+06	4.66789e+06	547535	589477	3.0869e+06	519173	3.81691e+06	799052	400609	1.1869e+06	10563.3	10563.3	775440	963852
Cryz	P47199	Quinone oxidoreductase OS=Mus musculus OX=10090 GN=Cryz PE=1 SV=1	10563.3	10563.3	10563.3	10563.3	10563.3	10563.3	10563.3	10563.3	10563.3	10563.3	10563.3	10563.3	10563.3	10563.3	1.54788e+06	10563.3	10563.3
Cryzl2	Q3UNZ8	Quinone oxidoreductase-like protein 2 OS=Mus musculus OX=10090 GN=Cryzl2 PE=1 SV=1	10563.3	10563.3	10563.3	10563.3	10563.3	10563.3	10563.3	10563.3	10563.3	10563.3	10563.3	10563.3	1.76433e+06	250485	4.02051e+06	822976	1.83879e+06
Cs	Q9CZU6	Citrate synthase, mitochondrial OS=Mus musculus OX=10090 GN=Cs PE=1 SV=1	572762	454315	346495	2.82205e+06	415452	453349	10563.3	238472	494036	10563.3	415138	10563.3	10563.3	10563.3	10563.3	10563.3	10563.3
Csad	Q9DBE0	Cysteine sulfinic acid decarboxylase OS=Mus musculus OX=10090 GN=Csad PE=1 SV=1	10563.3	10563.3	10563.3	10563.3	10563.3	10563.3	10563.3	10563.3	10563.3	10563.3	10563.3	10563.3	789696	3.77633e+06	10563.3	10563.3	4.10552e+06
Cse1l	Q9ERK4	Exportin-2 OS=Mus musculus OX=10090 GN=Cse1l PE=1 SV=1	965931	2.90235e+06	2.9053e+06	1.56362e+06	3.80025e+06	2.52584e+06	1.36852e+06	1.28972e+06	6.9158e+06	4.33259e+06	4.61963e+06	3.016e+06	10563.3	10563.3	10563.3	10563.3	10563.3
Csf1r	P09581	Macrophage colony-stimulating factor 1 receptor OS=Mus musculus OX=10090 GN=Csf1r PE=1 SV=3	1.31351e+06	852758	620683	1.16622e+06	628672	880516	1.09118e+06	10563.3	1.34482e+06	430126	10563.3	386203	287941	10563.3	2.35087e+06	647169	10563.3
Csk	P41241	Tyrosine-protein kinase CSK OS=Mus musculus OX=10090 GN=Csk PE=1 SV=2	359675	10563.3	10563.3	10563.3	575247	10563.3	10563.3	627128	10563.3	607101	10563.3	10563.3	10563.3	10563.3	10563.3	10563.3	10563.3
Cspg4	Q8VHY0	Chondroitin sulfate proteoglycan 4 OS=Mus musculus OX=10090 GN=Cspg4 PE=1 SV=3	434412	374160	605241	779641	355747	1.16659e+06	1.20765e+06	10563.3	1.64254e+06	571989	449690	314236	10563.3	10563.3	10563.3	10563.3	10563.3
Cst3	P21460	Cystatin-C OS=Mus musculus OX=10090 GN=Cst3 PE=1 SV=2	1.17188e+06	1.82343e+06	2.69992e+06	2.54113e+06	2.82868e+06	3.06932e+06	3.68286e+06	1.14633e+06	6.95748e+06	1.06044e+06	5.64669e+06	4.22797e+06	2.49748e+06	1.80851e+06	6.98102e+06	2.50654e+06	10563.3
Cst7	O89098	Cystatin-F OS=Mus musculus OX=10090 GN=Cst7 PE=2 SV=1	339802	450552	10563.3	10563.3	10563.3	10563.3	376107	655827	10563.3	10563.3	10563.3	10563.3	10563.3	10563.3	10563.3	10563.3	10563.3
Cth	Q8VCN5	Cystathionine gamma-lyase OS=Mus musculus OX=10090 GN=Cth PE=1 SV=1	10563.3	10563.3	10563.3	298527	10563.3	10563.3	228751	5.32651e+06	1.47902e+06	3.63605e+07	2.20815e+07	3.11264e+06	1.78335e+07	3.0267e+07	3.12973e+06	1.4134e+07	1.52589e+07
Ctla2a	P12399	Protein CTLA-2-alpha OS=Mus musculus OX=10090 GN=Ctla2a PE=2 SV=2	8.1142e+07	1.24093e+08	7.587e+07	3.57726e+07	4.96813e+07	4.30372e+07	1.08261e+08	8.93353e+07	4.33872e+07	3.77119e+07	1.79938e+07	1.40855e+07	5.59497e+07	4.23164e+06	1.74951e+07	3.33615e+07	7.72715e+07
Ctrb1	Q9CR35	Chymotrypsinogen B OS=Mus musculus OX=10090 GN=Ctrb1 PE=1 SV=1	287496	182607	10563.3	166316	10563.3	10563.3	291688	10563.3	10563.3	10563.3	10563.3	424399	10563.3	1.07217e+06	631069	10563.3	10563.3
Ctsa	P16675	Lysosomal protective protein OS=Mus musculus OX=10090 GN=Ctsa PE=1 SV=1	832383	1.16986e+06	993291	1.36907e+06	1.69557e+06	1.22253e+06	857725	442754	566523	873289	1.22865e+06	653891	691213	732152	943467	965132	1.02992e+06
Ctsb	P10605	Cathepsin B OS=Mus musculus OX=10090 GN=Ctsb PE=1 SV=2	1.54838e+07	2.09135e+07	2.37223e+07	2.97265e+07	2.48032e+07	3.61555e+07	9.61442e+07	2.49889e+07	7.42885e+07	1.79413e+07	4.34683e+07	2.8378e+07	5.15229e+07	1.77849e+07	1.08537e+08	4.84788e+07	7.72909e+07
Ctsd	P18242	Cathepsin D OS=Mus musculus OX=10090 GN=Ctsd PE=1 SV=1	4.379e+07	5.56862e+07	6.40061e+07	8.18462e+07	5.99036e+07	7.51044e+07	3.48103e+07	3.11334e+07	2.8239e+07	5.57317e+07	3.72297e+07	3.14182e+07	3.56372e+07	2.24213e+07	2.73841e+07	4.72325e+07	4.59404e+07
Ctse	P70269	Cathepsin E OS=Mus musculus OX=10090 GN=Ctse PE=1 SV=2	3.60737e+07	3.5863e+07	3.15754e+07	2.32736e+07	2.99338e+07	3.27053e+07	1.62299e+07	6.30683e+07	1.12094e+07	5.21095e+06	1.26132e+07	9.57873e+06	8.44796e+07	2.85542e+07	5.64751e+07	3.78777e+07	2.56143e+07
Ctsg	P28293	Cathepsin G OS=Mus musculus OX=10090 GN=Ctsg PE=1 SV=2	10563.3	228457	10563.3	10563.3	10563.3	10563.3	10563.3	10563.3	831228	10563.3	10563.3	10563.3	255414	10563.3	182170	10563.3	10563.3
Ctso	Q8BM88	Cathepsin O OS=Mus musculus OX=10090 GN=Ctso PE=2 SV=1	10563.3	10563.3	10563.3	314374	340941	10563.3	10563.3	364487	720288	10563.3	294490	324003	384473	259852	608860	10563.3	368045
Ctss	O70370	Cathepsin S OS=Mus musculus OX=10090 GN=Ctss PE=1 SV=2	1.68926e+06	2.04052e+06	2.50128e+06	2.06841e+06	2.41895e+06	2.27602e+06	2.02657e+06	945055	2.93982e+06	1.17277e+06	2.66761e+06	2.3866e+06	2.58684e+06	2.09457e+06	5.99271e+06	2.50038e+06	1.79284e+06
Ctsz	Q9WUU7	Cathepsin Z OS=Mus musculus OX=10090 GN=Ctsz PE=1 SV=1	716789	2.5244e+06	1.5519e+06	1.13198e+06	835157	1.17376e+06	1.45335e+06	2.55475e+06	3.23594e+06	2.10628e+06	1.17408e+06	1.49755e+06	1.15949e+06	602684	1.18719e+06	489050	1.76551e+06
Cul1	Q9WTX6	Cullin-1 OS=Mus musculus OX=10090 GN=Cul1 PE=1 SV=1	729354	1.19008e+06	1.30628e+06	668019	638725	990312	474683	10563.3	704421	10563.3	10563.3	10563.3	10563.3	10563.3	10563.3	10563.3	387344
Cul3	Q9JLV5	Cullin-3 OS=Mus musculus OX=10090 GN=Cul3 PE=1 SV=1	147774	273004	191753	160045	334051	10563.3	151822	10563.3	10563.3	10563.3	133050	10563.3	10563.3	10563.3	10563.3	10563.3	10563.3
Cuta	Q9CQ89	Protein CutA OS=Mus musculus OX=10090 GN=Cuta PE=1 SV=3	2.34687e+06	3.83819e+06	3.25745e+06	969792	3.62873e+06	431220	733756	1.66282e+06	187702	10563.3	710284	192394	3.03196e+06	1.68534e+06	2.78144e+06	2.68667e+06	2.65084e+06
Cwc22	Q8C5N3	Pre-mRNA-splicing factor CWC22 homolog OS=Mus musculus OX=10090 GN=Cwc22 PE=1 SV=1	10563.3	10563.3	10563.3	10563.3	10563.3	10563.3	10563.3	10563.3	10563.3	10563.3	10563.3	10563.3	503948	5.8789e+06	1.88778e+06	1.75853e+06	10563.3
Cxcl12	P40224	Stromal cell-derived factor 1 OS=Mus musculus OX=10090 GN=Cxcl12 PE=2 SV=2	2.9171e+06	4.42446e+06	3.89381e+06	1.68785e+06	1.05711e+06	260950	2.00705e+06	2.00212e+06	10563.3	1.21267e+06	10563.3	779116	2.66278e+06	683201	626210	2.98185e+06	4.37941e+06
Cxcl13	O55038	C-X-C motif chemokine 13 OS=Mus musculus OX=10090 GN=Cxcl13 PE=1 SV=1	10563.3	10563.3	10563.3	10563.3	10563.3	10563.3	10563.3	10563.3	2.77207e+06	1.23575e+06	10563.3	10563.3	10563.3	10563.3	10563.3	10563.3	10563.3
Cxcl5	P50228	C-X-C motif chemokine 5 OS=Mus musculus OX=10090 GN=Cxcl5 PE=1 SV=2	1.84943e+08	2.87041e+08	1.41287e+08	5.81361e+07	1.0102e+08	6.52091e+07	1.789e+08	1.57777e+08	8.10353e+07	1.2045e+08	3.11998e+07	4.54173e+07	10563.3	10563.3	257704	577464	1.39586e+06
Cyb5a	P56395	Cytochrome b5 OS=Mus musculus OX=10090 GN=Cyb5a PE=1 SV=2	3.2571e+06	7.32825e+06	6.64951e+06	8.79503e+06	7.70125e+06	1.30558e+07	1.94362e+07	5.39145e+07	6.12875e+06	1.79636e+07	3.90271e+07	4.72975e+06	5.89181e+07	3.68626e+07	1.57245e+06	7.87552e+07	1.40754e+08
Cyb5r3	Q9DCN2	NADH-cytochrome b5 reductase 3 OS=Mus musculus OX=10090 GN=Cyb5r3 PE=1 SV=3	10563.3	10563.3	10563.3	10563.3	10563.3	10563.3	10563.3	10563.3	10563.3	10563.3	10563.3	10563.3	447664	513417	434065	583167	764703
Cycs	P62897	Cytochrome c, somatic OS=Mus musculus OX=10090 GN=Cycs PE=1 SV=2	10563.3	10563.3	10563.3	582836	10563.3	10563.3	376959	10563.3	213228	176769	10563.3	10563.3	10563.3	10563.3	758559	10563.3	10563.3
Cyp2d10	P24456	Cytochrome P450 2D10 OS=Mus musculus OX=10090 GN=Cyp2d10 PE=1 SV=2	10563.3	10563.3	10563.3	10563.3	10563.3	10563.3	10563.3	10563.3	10563.3	10563.3	10563.3	10563.3	1.79465e+06	1.56788e+06	1.45703e+06	1.59245e+06	2.19149e+06
Cyp2f2	P33267	Cytochrome P450 2F2 OS=Mus musculus OX=10090 GN=Cyp2f2 PE=1 SV=1	10563.3	10563.3	10563.3	10563.3	10563.3	10563.3	10563.3	10563.3	10563.3	10563.3	10563.3	10563.3	275261	1.23762e+06	10563.3	472718	537033
Cyp4a14	O35728	Cytochrome P450 4A14 OS=Mus musculus OX=10090 GN=Cyp4a14 PE=1 SV=1	10563.3	10563.3	10563.3	10563.3	10563.3	10563.3	10563.3	10563.3	10563.3	10563.3	10563.3	10563.3	626950	1.14866e+06	10563.3	580972	1.3458e+06
Dag1	Q62165	Dystroglycan OS=Mus musculus OX=10090 GN=Dag1 PE=1 SV=4	576308	342568	10563.3	10563.3	10563.3	10563.3	469678	10563.3	550167	10563.3	10563.3	10563.3	467491	294811	905434	392657	10563.3
Dars1	Q922B2	Aspartate--tRNA ligase, cytoplasmic OS=Mus musculus OX=10090 GN=Dars1 PE=1 SV=2	1.99842e+07	1.94743e+07	9.8972e+06	1.32488e+07	2.42296e+07	6.94661e+06	1.52705e+07	4.22849e+06	4.97929e+07	1.33766e+07	2.94376e+07	3.38059e+06	1.57941e+07	1.45862e+07	5.75233e+06	1.66537e+07	2.24554e+07
Dbi	P31786	Acyl-CoA-binding protein OS=Mus musculus OX=10090 GN=Dbi PE=1 SV=2	10563.3	10563.3	10563.3	10563.3	10563.3	10563.3	10563.3	10563.3	10563.3	10563.3	10563.3	10563.3	224960	10563.3	2.08498e+06	10563.3	10563.3
Dclk1	Q9JLM8	Serine/threonine-protein kinase DCLK1 OS=Mus musculus OX=10090 GN=Dclk1 PE=1 SV=1	10563.3	10563.3	10563.3	10563.3	10563.3	10563.3	10563.3	10563.3	10563.3	10563.3	10563.3	10563.3	10563.3	1.97649e+06	930160	1.99562e+06	1.89776e+06
Dctn1	O08788	Dynactin subunit 1 OS=Mus musculus OX=10090 GN=Dctn1 PE=1 SV=3	10563.3	10563.3	316884	10563.3	163971	10563.3	198654	10563.3	10563.3	10563.3	10563.3	10563.3	10563.3	10563.3	10563.3	10563.3	10563.3
Dctn2	Q99KJ8	Dynactin subunit 2 OS=Mus musculus OX=10090 GN=Dctn2 PE=1 SV=3	163924	740053	2.13363e+06	2.29332e+06	322953	851360	1.41384e+06	387782	1.23273e+06	1.51423e+06	1.95265e+06	10563.3	10563.3	10563.3	10563.3	10563.3	10563.3
Dcun1d1	Q9QZ73	DCN1-like protein 1 OS=Mus musculus OX=10090 GN=Dcun1d1 PE=2 SV=1	422916	645069	528630	438790	904252	10563.3	10563.3	10563.3	10563.3	404226	491460	10563.3	10563.3	10563.3	10563.3	10563.3	10563.3
Dcxr	Q91X52	L-xylulose reductase OS=Mus musculus OX=10090 GN=Dcxr PE=1 SV=2	10563.3	10563.3	10563.3	10563.3	10563.3	10563.3	10563.3	535797	10563.3	10563.3	10563.3	10563.3	643967	728106	1.60189e+06	1.02629e+06	1.63156e+06
Ddb1	Q3U1J4	DNA damage-binding protein 1 OS=Mus musculus OX=10090 GN=Ddb1 PE=1 SV=2	10563.3	10563.3	10563.3	10563.3	10563.3	10563.3	10563.3	10563.3	10563.3	10563.3	10563.3	10563.3	346515	10563.3	10563.3	274657	501316
Ddi2	A2ADY9	Protein DDI1 homolog 2 OS=Mus musculus OX=10090 GN=Ddi2 PE=1 SV=1	266640	633012	363791	185153	597557	10563.3	10563.3	10563.3	10563.3	10563.3	378849	10563.3	10563.3	10563.3	10563.3	10563.3	10563.3
Dera	Q91YP3	Deoxyribose-phosphate aldolase OS=Mus musculus OX=10090 GN=Dera PE=1 SV=1	10563.3	513639	10563.3	10563.3	208311	10563.3	221474	375149	10563.3	10563.3	676201	10563.3	10563.3	10563.3	10563.3	10563.3	844257
Dgkd	E9PUQ8	Diacylglycerol kinase delta OS=Mus musculus OX=10090 GN=Dgkd PE=1 SV=1	10563.3	10563.3	4.23373e+07	3.71472e+07	1.84107e+07	4.70589e+07	1.36439e+06	10563.3	491654	256682	367010	10563.3	10563.3	10563.3	10563.3	10563.3	10563.3
Dhrs1	Q99L04	Dehydrogenase/reductase SDR family member 1 OS=Mus musculus OX=10090 GN=Dhrs1 PE=1 SV=1	10563.3	10563.3	10563.3	10563.3	10563.3	10563.3	10563.3	10563.3	10563.3	10563.3	10563.3	10563.3	10563.3	10563.3	10563.3	10563.3	1.09171e+06
Dhrs11	Q3U0B3	Dehydrogenase/reductase SDR family member 11 OS=Mus musculus OX=10090 GN=Dhrs11 PE=1 SV=1	9.0861e+06	1.18162e+07	1.11721e+07	6.12051e+06	2.29631e+07	4.81285e+06	5.41038e+06	2.38007e+06	4.7221e+06	9.09596e+06	1.46257e+07	3.64406e+06	2.17083e+06	1.31385e+06	998013	3.87682e+06	2.06447e+06
Dhx30	Q99PU8	ATP-dependent RNA helicase DHX30 OS=Mus musculus OX=10090 GN=Dhx30 PE=1 SV=1	1.97483e+07	2.13112e+07	5.57687e+06	5.88216e+06	1.10941e+07	4.51546e+06	3.08947e+07	10563.3	3.2437e+07	2.48647e+07	3.19808e+06	1.86113e+07	1.62605e+07	1.94287e+07	4.59415e+07	8.43454e+06	7.1887e+06
Diaph1	O08808	Protein diaphanous homolog 1 OS=Mus musculus OX=10090 GN=Diaph1 PE=1 SV=1	1.83555e+06	3.79775e+06	4.1262e+06	1.98235e+06	1.6281e+06	336746	5.34982e+06	4.64241e+06	6.03833e+06	2.46149e+06	6.03732e+06	2.4169e+06	4.79241e+06	3.89349e+06	2.26902e+06	4.36768e+06	8.02464e+06
Dicer1	Q8R418	Endoribonuclease Dicer OS=Mus musculus OX=10090 GN=Dicer1 PE=1 SV=3	1.51546e+06	3.8943e+06	1.099e+07	5.67138e+06	10563.3	7.33775e+06	1.27436e+07	10563.3	8.78879e+06	1.00773e+07	5.83794e+06	2.49278e+06	10563.3	10563.3	10563.3	10563.3	10563.3
Dipk2a	Q3USZ8	Divergent protein kinase domain 2A OS=Mus musculus OX=10090 GN=Dipk2a PE=1 SV=2	10563.3	10563.3	10563.3	10563.3	10563.3	10563.3	10563.3	10563.3	10563.3	10563.3	10563.3	10563.3	137511	10563.3	10563.3	128915	540817
Dkk1	O54908	Dickkopf-related protein 1 OS=Mus musculus OX=10090 GN=Dkk1 PE=1 SV=2	6.54093e+06	2.41179e+06	2.74822e+06	2.58451e+06	2.78323e+06	6.52839e+06	8.23416e+06	1.58248e+06	6.96881e+06	2.19895e+06	4.63185e+06	5.45638e+06	10563.3	10563.3	10563.3	10563.3	10563.3
Dkk3	Q9QUN9	Dickkopf-related protein 3 OS=Mus musculus OX=10090 GN=Dkk3 PE=2 SV=1	1.13889e+07	1.18961e+07	4.33706e+06	8.46681e+06	8.41782e+06	5.48505e+06	3.59094e+06	3.47062e+06	2.11049e+06	3.55047e+06	1.81527e+06	1.55082e+06	4.93627e+06	2.95738e+06	6.91821e+06	2.04138e+06	5.39178e+06
Dld	O08749	Dihydrolipoyl dehydrogenase, mitochondrial OS=Mus musculus OX=10090 GN=Dld PE=1 SV=2	4.38508e+06	5.51738e+06	4.37817e+06	7.17746e+06	6.29972e+06	8.01817e+06	3.12695e+06	5.32776e+06	3.30639e+06	6.07454e+06	4.3668e+06	2.76799e+06	5.48488e+06	8.62635e+06	3.11467e+06	7.44987e+06	5.89236e+06
Dlg5	E9Q9R9	Disks large homolog 5 OS=Mus musculus OX=10090 GN=Dlg5 PE=1 SV=1	10563.3	10563.3	10563.3	10563.3	10563.3	10563.3	10563.3	10563.3	10563.3	10563.3	10563.3	10563.3	1.12654e+07	1.31594e+07	10563.3	10563.3	1.18381e+07
Dmkn	Q6P253	Dermokine OS=Mus musculus OX=10090 GN=Dmkn PE=2 SV=2	3.46573e+06	3.53991e+06	4.59474e+06	4.90597e+06	4.74491e+06	4.788e+06	4.43569e+06	334531	1.15124e+07	1.32241e+07	531263	3.56609e+06	10563.3	10563.3	10563.3	10563.3	10563.3
Dmtn	Q9WV69	Dematin OS=Mus musculus OX=10090 GN=Dmtn PE=1 SV=1	402108	321231	10563.3	302542	1.13897e+06	10563.3	10563.3	313315	10563.3	10563.3	10563.3	10563.3	10563.3	10563.3	10563.3	10563.3	10563.3
Dmxl1	Q6PNC0	DmX-like protein 1 OS=Mus musculus OX=10090 GN=Dmxl1 PE=1 SV=1	10563.3	10563.3	10563.3	10563.3	10563.3	233713	10563.3	332592	10563.3	321330	10563.3	10563.3	10563.3	10563.3	10563.3	10563.3	10563.3
Dnah8	Q91XQ0	Dynein heavy chain 8, axonemal OS=Mus musculus OX=10090 GN=Dnah8 PE=1 SV=2	1.94536e+06	1.94309e+06	1.26834e+06	1.08297e+06	1.51188e+06	1.36373e+06	1.16578e+06	1.62422e+06	1.1796e+06	1.1892e+06	978781	1.34585e+06	10563.3	10563.3	10563.3	10563.3	10563.3
Dnaja2	Q9QYJ0	DnaJ homolog subfamily A member 2 OS=Mus musculus OX=10090 GN=Dnaja2 PE=1 SV=1	10563.3	10563.3	362103	1.263e+06	790778	10563.3	211423	10563.3	10563.3	320477	625363	10563.3	10563.3	10563.3	10563.3	10563.3	10563.3
Dnajb11	Q99KV1	DnaJ homolog subfamily B member 11 OS=Mus musculus OX=10090 GN=Dnajb11 PE=1 SV=1	8.43169e+06	9.65508e+06	1.42253e+07	2.04388e+07	1.39978e+07	1.33059e+07	1.46229e+07	3.4819e+06	1.86819e+07	1.50549e+07	1.41012e+07	1.18016e+07	1.82228e+07	1.09191e+07	8.53816e+06	1.69368e+07	1.71526e+07
Dnajb4	Q9D832	DnaJ homolog subfamily B member 4 OS=Mus musculus OX=10090 GN=Dnajb4 PE=1 SV=1	1.64049e+06	3.18092e+06	4.10578e+06	4.72059e+06	3.72775e+06	2.55846e+06	2.25305e+06	1.19735e+06	2.29385e+06	4.18527e+06	5.58004e+06	1.22014e+06	225784	252774	10563.3	315233	644193
Dnajc3	Q91YW3	DnaJ homolog subfamily C member 3 OS=Mus musculus OX=10090 GN=Dnajc3 PE=1 SV=1	2.75321e+06	2.44862e+06	1.58683e+06	1.10331e+06	2.42246e+06	671230	792201	1.49496e+06	1.08112e+06	6.14921e+06	1.05327e+06	609824	985839	1.04447e+06	573754	825052	1.18794e+06
Dnase1	P49183	Deoxyribonuclease-1 OS=Mus musculus OX=10090 GN=Dnase1 PE=1 SV=2	1.33251e+07	6.61013e+06	9.9025e+06	1.3014e+07	1.00055e+07	9.41646e+06	1.87575e+07	1.06439e+07	9.09999e+06	3.74174e+07	1.55203e+07	5.53926e+06	1.48277e+07	3.18057e+07	9.8904e+06	1.075e+07	1.79225e+07
Dnm1	P39053	Dynamin-1 OS=Mus musculus OX=10090 GN=Dnm1 PE=1 SV=2	10563.3	10563.3	10563.3	2.23975e+06	10563.3	10563.3	10563.3	10563.3	165842	310123	10563.3	10563.3	10563.3	10563.3	10563.3	10563.3	10563.3
Dnm1l	Q8K1M6	Dynamin-1-like protein OS=Mus musculus OX=10090 GN=Dnm1l PE=1 SV=2	2.28413e+06	4.46101e+06	3.08135e+06	1.72823e+06	1.85955e+06	1.62205e+06	4.2601e+06	4.13614e+06	10563.3	2.99645e+06	980849	1.15745e+06	10563.3	10563.3	10563.3	10563.3	990057
Dnm2	P39054	Dynamin-2 OS=Mus musculus OX=10090 GN=Dnm2 PE=1 SV=2	2.86394e+06	1.91883e+06	3.21611e+06	5.65449e+06	3.94732e+06	2.42965e+06	3.24434e+06	1.13061e+06	3.76504e+06	2.34197e+06	4.86394e+06	1.59075e+06	957259	10563.3	248272	780957	1.56569e+06
Dnpep	Q9Z2W0	Aspartyl aminopeptidase OS=Mus musculus OX=10090 GN=Dnpep PE=1 SV=2	3.54986e+07	6.07235e+07	6.86501e+07	6.10857e+07	7.81643e+07	5.41682e+07	1.86972e+07	3.56427e+07	1.10693e+07	4.17042e+07	5.93275e+07	1.76191e+07	4.1509e+07	5.6698e+07	4.6607e+07	5.5268e+07	8.11703e+07
Dpep1	P31428	Dipeptidase 1 OS=Mus musculus OX=10090 GN=Dpep1 PE=1 SV=2	10563.3	276320	10563.3	447147	309929	357428	10563.3	407627	10563.3	10563.3	359430	674259	313169	3.76395e+06	2.1683e+06	491040	188492
Dpp4	P28843	Dipeptidyl peptidase 4 OS=Mus musculus OX=10090 GN=Dpp4 PE=1 SV=3	300926	150914	166417	199549	277331	272286	104597	157963	128562	316189	268428	204415	10563.3	10563.3	10563.3	10563.3	10563.3
Dpt	Q9QZZ6	Dermatopontin OS=Mus musculus OX=10090 GN=Dpt PE=1 SV=1	3.08366e+06	5.94488e+06	3.00675e+06	4.7353e+06	3.82547e+06	4.06535e+06	5.97039e+06	5.53815e+06	10563.3	2.28953e+06	3.84281e+06	1.009e+06	8.96698e+06	4.07996e+06	5.65175e+06	5.74372e+06	5.85787e+06
Dpyd	Q8CHR6	Dihydropyrimidine dehydrogenase [NADP(+)] OS=Mus musculus OX=10090 GN=Dpyd PE=1 SV=1	10563.3	10563.3	10563.3	10563.3	10563.3	10563.3	10563.3	10563.3	10563.3	10563.3	10563.3	10563.3	2.34024e+06	1.80841e+06	10563.3	1.80065e+06	3.17546e+06
Dpysl2	O08553	Dihydropyrimidinase-related protein 2 OS=Mus musculus OX=10090 GN=Dpysl2 PE=1 SV=2	2.39984e+06	4.39207e+06	4.43673e+06	3.24859e+07	2.09545e+06	1.83829e+06	9.04821e+06	1.02726e+06	451017	8.37788e+06	5.21409e+06	123029	1.75004e+06	351809	1.20226e+07	4.75999e+06	5.74649e+06
Dpysl3	Q62188	Dihydropyrimidinase-related protein 3 OS=Mus musculus OX=10090 GN=Dpysl3 PE=1 SV=1	10563.3	10563.3	10563.3	298247	10563.3	10563.3	186379	10563.3	10563.3	10563.3	10563.3	10563.3	10563.3	10563.3	10563.3	10563.3	10563.3
Dsc2	P55292	Desmocollin-2 OS=Mus musculus OX=10090 GN=Dsc2 PE=1 SV=1	356376	330659	434321	646849	599543	458778	362355	10563.3	685208	599821	1.19659e+06	770422	511388	10563.3	482082	10563.3	10563.3
Dsp	E9Q557	Desmoplakin OS=Mus musculus OX=10090 GN=Dsp PE=1 SV=1	10563.3	10563.3	403622	586387	10563.3	582360	10563.3	10563.3	471642	10563.3	10563.3	387741	10563.3	10563.3	10563.3	10563.3	10563.3
Dstn	Q9R0P5	Destrin OS=Mus musculus OX=10090 GN=Dstn PE=1 SV=3	1.11938e+07	2.70216e+07	1.82656e+07	2.23776e+07	1.70973e+07	1.08288e+07	2.24345e+07	9.48724e+06	2.09897e+07	1.66748e+07	3.38547e+07	8.07533e+06	9.84759e+06	4.8292e+06	7.15976e+06	1.01649e+07	1.89522e+07
Dus2	Q9D7B1	tRNA-dihydrouridine(20) synthase [NAD(P)+]-like OS=Mus musculus OX=10090 GN=Dus2 PE=1 SV=1	10563.3	10563.3	10563.3	10563.3	10563.3	10563.3	10563.3	10563.3	10563.3	10563.3	10563.3	10563.3	10563.3	598086	889142	10563.3	10563.3
Dusp3	Q9D7X3	Dual specificity protein phosphatase 3 OS=Mus musculus OX=10090 GN=Dusp3 PE=1 SV=1	983784	6.60293e+06	5.48797e+06	5.84403e+06	1.43968e+06	2.14985e+06	3.99474e+06	5.29399e+06	3.38894e+06	3.91484e+06	1.12499e+07	1.02681e+06	2.48251e+06	710047	835965	2.08967e+06	3.90957e+06
Dync1h1	Q9JHU4	Cytoplasmic dynein 1 heavy chain 1 OS=Mus musculus OX=10090 GN=Dync1h1 PE=1 SV=2	10563.3	501564	545011	263058	10563.3	10563.3	10563.3	10563.3	10563.3	468171	755926	10563.3	126444	10563.3	10563.3	377119	376233
Dynll2	Q9D0M5	Dynein light chain 2, cytoplasmic OS=Mus musculus OX=10090 GN=Dynll2 PE=1 SV=1	371510	725529	643575	575952	523703	428591	785827	487538	971285	666092	1.08071e+06	10563.3	10563.3	10563.3	10563.3	10563.3	10563.3
Dzip1	Q8BMD2	Zinc finger protein DZIP1 OS=Mus musculus OX=10090 GN=Dzip1 PE=1 SV=3	10563.3	10563.3	10563.3	10563.3	10563.3	10563.3	10563.3	10563.3	10563.3	10563.3	10563.3	10563.3	407133	10563.3	361466	437460	567902
Ech1	O35459	Delta(3,5)-Delta(2,4)-dienoyl-CoA isomerase, mitochondrial OS=Mus musculus OX=10090 GN=Ech1 PE=1 SV=1	10563.3	10563.3	10563.3	10563.3	10563.3	10563.3	10563.3	10563.3	10563.3	10563.3	10563.3	10563.3	10563.3	10563.3	1.15972e+06	10563.3	10563.3
Echdc1	Q9D9V3	Ethylmalonyl-CoA decarboxylase OS=Mus musculus OX=10090 GN=Echdc1 PE=1 SV=2	566393	351450	823050	405490	1.15372e+06	3.40239e+06	1.63042e+06	4.92341e+06	1.88493e+06	1.71002e+06	800781	10563.3	4.18512e+06	3.98211e+06	657320	4.42067e+06	5.58991e+06
Ecm1	Q61508	Extracellular matrix protein 1 OS=Mus musculus OX=10090 GN=Ecm1 PE=1 SV=2	4.47149e+08	5.87593e+08	7.79923e+08	6.6173e+08	6.44876e+08	9.93629e+08	5.4395e+08	7.43169e+08	6.79045e+08	8.73457e+08	1.10861e+09	1.08844e+09	5.93962e+08	6.81303e+08	3.79295e+08	6.37315e+08	4.68071e+08
Eef1a1	P10126	Elongation factor 1-alpha 1 OS=Mus musculus OX=10090 GN=Eef1a1 PE=1 SV=3	7.18572e+07	1.01796e+08	1.00459e+08	1.12671e+08	1.12847e+08	5.073e+07	1.04263e+08	8.83398e+07	1.05638e+08	8.86805e+07	1.25194e+08	3.89699e+07	8.44566e+07	5.07599e+07	7.75642e+07	9.50671e+07	1.37327e+08
Eef1a2	P62631	Elongation factor 1-alpha 2 OS=Mus musculus OX=10090 GN=Eef1a2 PE=1 SV=1	10563.3	10563.3	10563.3	10563.3	10563.3	10563.3	10563.3	10563.3	10563.3	10563.3	10563.3	10563.3	1.3194e+06	10563.3	10563.3	1.05026e+06	1.4393e+06
Eef1b	O70251	Elongation factor 1-beta OS=Mus musculus OX=10090 GN=Eef1b PE=1 SV=5	2.83642e+06	8.85387e+06	1.18624e+07	1.14481e+07	4.60381e+06	3.54202e+06	9.82291e+06	5.76504e+06	3.32309e+06	8.11745e+06	1.21277e+07	1.36712e+06	4.33585e+06	3.63273e+06	2.56536e+06	3.30112e+06	8.62965e+06
Eef1d	P57776	Elongation factor 1-delta OS=Mus musculus OX=10090 GN=Eef1d PE=1 SV=3	1.74186e+06	3.30254e+06	4.42711e+06	4.91967e+06	2.67241e+06	1.79093e+06	3.09261e+06	4.316e+06	6.1859e+06	2.99113e+06	7.07343e+06	429725	1.25308e+06	1.44454e+06	611137	1.06935e+06	1.79665e+06
Eef1g	Q9D8N0	Elongation factor 1-gamma OS=Mus musculus OX=10090 GN=Eef1g PE=1 SV=3	6.97338e+06	8.1415e+06	1.12312e+07	1.22947e+07	9.12327e+06	5.91418e+06	7.58097e+06	1.10834e+07	6.49421e+06	7.71897e+06	1.03065e+07	2.09123e+06	1.81102e+06	1.91516e+06	849362	1.60129e+06	3.82271e+06
Eef2	P58252	Elongation factor 2 OS=Mus musculus OX=10090 GN=Eef2 PE=1 SV=2	5.12526e+06	5.15407e+06	2.71775e+06	6.39966e+06	6.49435e+06	4.41607e+06	1.43699e+06	1.84696e+06	4.00562e+06	3.57498e+06	3.73652e+06	1.54917e+06	7.19641e+06	9.65385e+06	3.80448e+06	7.50635e+06	7.48011e+06
Efemp1	Q8BPB5	EGF-containing fibulin-like extracellular matrix protein 1 OS=Mus musculus OX=10090 GN=Efemp1 PE=1 SV=1	3.7698e+08	4.19529e+08	3.54947e+08	3.76291e+08	3.73184e+08	4.02607e+08	3.23455e+08	9.64832e+07	1.88744e+08	2.0289e+08	2.26422e+08	2.31936e+08	1.3689e+08	9.39576e+07	1.5686e+08	1.16942e+08	1.05545e+08
Efemp2	Q9WVJ9	EGF-containing fibulin-like extracellular matrix protein 2 OS=Mus musculus OX=10090 GN=Efemp2 PE=1 SV=1	8.22335e+07	1.26549e+08	1.20948e+08	1.07665e+08	8.57874e+07	1.18568e+08	9.11932e+07	1.6956e+07	9.94705e+07	1.15338e+08	1.44411e+08	1.43435e+08	1.67004e+07	1.17847e+07	1.65204e+07	1.67954e+07	1.41964e+07
Egfl8	Q6GUQ1	Epidermal growth factor-like protein 8 OS=Mus musculus OX=10090 GN=Egfl8 PE=2 SV=2	10563.3	10563.3	10563.3	10563.3	10563.3	10563.3	10563.3	10563.3	10563.3	10563.3	10563.3	10563.3	10563.3	495465	422846	320682	228094
Egfr	Q01279	Epidermal growth factor receptor OS=Mus musculus OX=10090 GN=Egfr PE=1 SV=1	1.24071e+08	1.20797e+08	9.2723e+07	1.03291e+08	1.02294e+08	1.21267e+08	2.38828e+07	4.50815e+06	6.46324e+07	1.32897e+07	7.48322e+06	1.02408e+07	1.72965e+06	6.38012e+06	1.61272e+07	1.64236e+06	1.00865e+06
Ehd1	Q9WVK4	EH domain-containing protein 1 OS=Mus musculus OX=10090 GN=Ehd1 PE=1 SV=1	7.90416e+06	1.7662e+07	1.61356e+07	1.4936e+07	1.45891e+07	7.16204e+06	1.33983e+07	6.66158e+06	1.30835e+07	8.01646e+06	2.04085e+07	5.80259e+06	1.09689e+07	1.07981e+07	5.89411e+06	1.16347e+07	2.22494e+07
Ehd2	Q8BH64	EH domain-containing protein 2 OS=Mus musculus OX=10090 GN=Ehd2 PE=1 SV=1	10563.3	10563.3	10563.3	10563.3	10563.3	10563.3	10563.3	10563.3	10563.3	10563.3	10563.3	10563.3	366166	10563.3	10563.3	429529	1.17544e+06
Ehd3	Q9QXY6	EH domain-containing protein 3 OS=Mus musculus OX=10090 GN=Ehd3 PE=1 SV=2	1.935e+06	5.68904e+06	3.61446e+06	6.00369e+06	3.0903e+06	1.0229e+06	2.58038e+06	972292	1.92736e+06	2.1198e+06	5.14942e+06	186292	2.04841e+06	512775	3.17151e+06	2.30601e+06	4.2885e+06
Ehd4	Q9EQP2	EH domain-containing protein 4 OS=Mus musculus OX=10090 GN=Ehd4 PE=1 SV=1	4.77514e+08	4.24187e+08	4.14196e+08	3.96814e+08	4.67222e+08	3.45401e+08	3.84119e+08	2.32646e+08	4.12563e+08	2.92227e+08	3.15362e+08	3.43337e+08	6.25161e+06	5.6771e+06	3.18595e+06	8.93332e+06	2.42728e+07
Ehhadh	Q9DBM2	Peroxisomal bifunctional enzyme OS=Mus musculus OX=10090 GN=Ehhadh PE=1 SV=4	10563.3	10563.3	10563.3	10563.3	10563.3	10563.3	10563.3	10563.3	10563.3	10563.3	10563.3	10563.3	1.06651e+08	1.10534e+08	5.59468e+07	1.07101e+08	2.87867e+08
Eif1ax	Q8BMJ3	Eukaryotic translation initiation factor 1A, X-chromosomal OS=Mus musculus OX=10090 GN=Eif1ax PE=2 SV=3	10563.3	10563.3	10563.3	10563.3	10563.3	10563.3	10563.3	10563.3	10563.3	10563.3	10563.3	10563.3	403342	10563.3	10563.3	908296	10563.3
Eif2s1	Q6ZWX6	Eukaryotic translation initiation factor 2 subunit 1 OS=Mus musculus OX=10090 GN=Eif2s1 PE=1 SV=3	609685	1.40605e+06	1.78177e+06	2.12768e+06	4.92289e+06	352738	236475	651197	1.60139e+06	1.40239e+06	1.93492e+06	10563.3	10563.3	785183	10563.3	465231	956650
Eif2s2	Q99L45	Eukaryotic translation initiation factor 2 subunit 2 OS=Mus musculus OX=10090 GN=Eif2s2 PE=1 SV=1	356372	707622	1.24063e+06	565727	1.30124e+06	388359	1.08262e+06	484015	873827	1.60413e+06	555806	10563.3	10563.3	10563.3	10563.3	10563.3	10563.3
Eif2s3x	Q9Z0N1	Eukaryotic translation initiation factor 2 subunit 3, X-linked OS=Mus musculus OX=10090 GN=Eif2s3x PE=1 SV=2	360724	1.29468e+06	2.08096e+06	1.95114e+06	4.38879e+06	351480	824387	395781	739225	614864	1.78932e+06	10563.3	615356	409337	10563.3	491093	559293
Eif3b	Q8JZQ9	Eukaryotic translation initiation factor 3 subunit B OS=Mus musculus OX=10090 GN=Eif3b PE=1 SV=1	10563.3	10563.3	10563.3	10563.3	10563.3	10563.3	10563.3	10563.3	10563.3	10563.3	10563.3	10563.3	208357	202094	10563.3	293117	529584
Eif3e	P60229	Eukaryotic translation initiation factor 3 subunit E OS=Mus musculus OX=10090 GN=Eif3e PE=1 SV=1	10563.3	160600	10563.3	219867	10563.3	10563.3	10563.3	10563.3	10563.3	10563.3	299770	10563.3	185500	160556	10563.3	166007	371984
Eif3f	Q9DCH4	Eukaryotic translation initiation factor 3 subunit F OS=Mus musculus OX=10090 GN=Eif3f PE=1 SV=2	10563.3	229304	433631	570804	303803	10563.3	10563.3	10563.3	10563.3	10563.3	664495	10563.3	10563.3	10563.3	10563.3	10563.3	10563.3
Eif3h	Q91WK2	Eukaryotic translation initiation factor 3 subunit H OS=Mus musculus OX=10090 GN=Eif3h PE=1 SV=1	559172	278303	446558	576559	543612	1.10818e+06	790710	524903	793689	398251	2.09046e+06	725170	10563.3	10563.3	10563.3	10563.3	10563.3
Eif3i	Q9QZD9	Eukaryotic translation initiation factor 3 subunit I OS=Mus musculus OX=10090 GN=Eif3i PE=1 SV=1	10563.3	175756	385340	209472	10563.3	363083	427953	10563.3	577284	752735	502723	376207	10563.3	10563.3	10563.3	10563.3	10563.3
Eif3j2	Q66JS6	Eukaryotic translation initiation factor 3 subunit J-B OS=Mus musculus OX=10090 GN=Eif3j2 PE=1 SV=1	2.46231e+06	1.81256e+06	1.49154e+06	456412	6.45102e+06	203294	473389	753047	10563.3	1.28948e+06	1.3943e+06	10563.3	10563.3	10563.3	10563.3	10563.3	10563.3
Eif3l	Q8QZY1	Eukaryotic translation initiation factor 3 subunit L OS=Mus musculus OX=10090 GN=Eif3l PE=1 SV=1	10563.3	825004	296689	190532	221212	321973	176208	10563.3	376884	10563.3	10563.3	10563.3	10563.3	10563.3	10563.3	10563.3	10563.3
Eif4a1	P60843	Eukaryotic initiation factor 4A-I OS=Mus musculus OX=10090 GN=Eif4a1 PE=1 SV=1	1.73326e+07	2.2389e+07	1.99444e+07	1.54938e+07	1.77739e+07	1.46411e+07	1.77861e+07	5.84952e+06	2.73161e+07	1.83634e+07	1.96926e+07	1.38264e+07	7.50026e+06	3.60966e+06	7.47618e+06	5.33972e+06	7.97458e+06
Eif4b	Q8BGD9	Eukaryotic translation initiation factor 4B OS=Mus musculus OX=10090 GN=Eif4b PE=1 SV=1	369797	284128	339694	10563.3	813913	10563.3	10563.3	272989	10563.3	10563.3	582817	10563.3	10563.3	10563.3	10563.3	10563.3	10563.3
Eif4g1	Q6NZJ6	Eukaryotic translation initiation factor 4 gamma 1 OS=Mus musculus OX=10090 GN=Eif4g1 PE=1 SV=1	10563.3	10563.3	10563.3	10563.3	158356	10563.3	214354	10563.3	10563.3	10563.3	273013	10563.3	10563.3	10563.3	10563.3	10563.3	10563.3
Eif5	P59325	Eukaryotic translation initiation factor 5 OS=Mus musculus OX=10090 GN=Eif5 PE=1 SV=1	2.3092e+06	5.41102e+06	2.66266e+06	1.0924e+06	1.25747e+07	614635	2.52592e+06	369122	834069	2.17988e+06	1.83945e+06	401569	2.40388e+06	1.26452e+06	1.61892e+06	3.92461e+06	3.75487e+06
Eif5a	P63242	Eukaryotic translation initiation factor 5A-1 OS=Mus musculus OX=10090 GN=Eif5a PE=1 SV=2	2.26445e+07	2.97719e+07	3.36368e+07	2.67109e+07	5.92242e+07	1.42687e+07	2.45191e+07	1.81058e+07	2.56798e+07	3.05077e+07	5.75021e+07	1.02584e+07	9.00227e+06	5.31485e+06	7.03567e+06	9.74743e+06	1.68418e+07
Eif6	O55135	Eukaryotic translation initiation factor 6 OS=Mus musculus OX=10090 GN=Eif6 PE=1 SV=2	1.52633e+06	1.9715e+06	1.02648e+06	1.68478e+06	2.42402e+06	1.10316e+06	914034	556213	10563.3	816718	2.91695e+06	119575	696426	10563.3	1.07852e+06	897072	1.3637e+06
Elob	P62869	Elongin-B OS=Mus musculus OX=10090 GN=Elob PE=1 SV=1	289058	1.04961e+06	1.1646e+06	1.21192e+06	1.40455e+06	641719	568901	334794	694225	1.47619e+06	1.65898e+06	10563.3	1.21292e+06	965661	674384	852997	1.34769e+06
Eloc	P83940	Elongin-C OS=Mus musculus OX=10090 GN=Eloc PE=1 SV=1	10563.3	10563.3	10563.3	10563.3	10563.3	10563.3	10563.3	10563.3	10563.3	10563.3	10563.3	10563.3	10563.3	10563.3	10563.3	10563.3	1.15542e+06
Emc9	Q9DB76	ER membrane protein complex subunit 9 OS=Mus musculus OX=10090 GN=Emc9 PE=1 SV=1	1.06652e+07	3.14755e+07	6.45362e+07	3.723e+07	10563.3	3.09173e+07	6.02559e+07	10563.3	3.58272e+07	4.01703e+07	6.76538e+07	3.04204e+07	10563.3	10563.3	10563.3	10563.3	10563.3
Emilin1	Q99K41	EMILIN-1 OS=Mus musculus OX=10090 GN=Emilin1 PE=1 SV=1	2.03904e+07	3.62937e+07	3.58991e+07	2.48047e+07	854344	2.9972e+07	1.75593e+07	690654	2.51453e+07	1.26074e+07	2.20224e+07	1.09614e+07	10563.3	10563.3	10563.3	359108	2.32731e+06
Eno1	P17182	Alpha-enolase OS=Mus musculus OX=10090 GN=Eno1 PE=1 SV=3	6.66214e+06	5.82579e+06	1.49806e+06	2.84917e+07	9.33984e+06	3.22807e+06	8.03231e+06	6.27279e+06	1.08808e+07	1.56862e+07	7.9899e+06	3.64022e+06	8.43026e+06	1.05167e+07	2.12233e+07	1.24996e+07	1.2617e+07
Eno2	P17183	Gamma-enolase OS=Mus musculus OX=10090 GN=Eno2 PE=1 SV=2	215048	152710	560765	7.69578e+06	711594	10563.3	940446	10563.3	10563.3	2.0174e+06	670929	10563.3	10563.3	10563.3	10563.3	10563.3	10563.3
Enpp2	Q9R1E6	Ectonucleotide pyrophosphatase/phosphodiesterase family member 2 OS=Mus musculus OX=10090 GN=Enpp2 PE=1 SV=3	10563.3	688674	4.85577e+06	3.81381e+07	1.08453e+07	3.14355e+06	2.69478e+06	325760	3.72229e+06	1.09657e+06	1.72182e+06	2.88545e+06	927983	389075	1.56988e+06	467222	260253
Enpp7	Q3TIW9	Ectonucleotide pyrophosphatase/phosphodiesterase family member 7 OS=Mus musculus OX=10090 GN=Enpp7 PE=1 SV=1	10563.3	10563.3	303125	10563.3	3.13474e+06	243624	3.34019e+06	10563.3	10563.3	3.90727e+06	499163	351340	10563.3	10563.3	10563.3	10563.3	10563.3
Entpd5	Q9WUZ9	Ectonucleoside triphosphate diphosphohydrolase 5 OS=Mus musculus OX=10090 GN=Entpd5 PE=1 SV=1	2.06498e+06	4.36854e+06	4.97578e+06	3.86089e+06	3.58173e+06	3.1176e+06	6.70453e+06	1.8558e+07	1.20353e+07	5.9522e+06	2.00285e+07	1.41306e+07	3.69585e+07	1.42827e+07	2.22713e+07	5.60722e+07	5.71626e+07
Epb41	P48193	Protein 4.1 OS=Mus musculus OX=10090 GN=Epb41 PE=1 SV=2	1.2309e+07	1.47964e+07	1.25619e+07	8.41424e+06	2.62065e+07	5.70011e+06	7.9561e+06	4.1168e+06	2.32849e+06	3.50993e+06	6.49787e+06	4.64734e+06	2.73737e+06	1.22475e+06	1.33872e+06	4.48186e+06	4.53803e+06
Epb42	P49222	Protein 4.2 OS=Mus musculus OX=10090 GN=Epb42 PE=1 SV=3	2.45941e+06	834450	1.02336e+06	1.29882e+06	7.581e+06	884290	4.93213e+06	1.29748e+07	9.09017e+06	1.81153e+06	1.01611e+06	1.35053e+06	10563.3	10563.3	10563.3	10563.3	10563.3
Epcam	Q99JW5	Epithelial cell adhesion molecule OS=Mus musculus OX=10090 GN=Epcam PE=1 SV=1	10563.3	10563.3	10563.3	10563.3	10563.3	10563.3	10563.3	310472	10563.3	413998	10563.3	10563.3	10563.3	10563.3	10563.3	10563.3	10563.3
Ephx1	Q9D379	Epoxide hydrolase 1 OS=Mus musculus OX=10090 GN=Ephx1 PE=1 SV=2	10563.3	10563.3	10563.3	10563.3	10563.3	10563.3	10563.3	10563.3	10563.3	10563.3	10563.3	10563.3	10563.3	967397	937740	890739	1.08016e+06
Ephx2	P34914	Bifunctional epoxide hydrolase 2 OS=Mus musculus OX=10090 GN=Ephx2 PE=1 SV=2	10563.3	294329	10563.3	276857	10563.3	10563.3	10563.3	143550	10563.3	552966	2.1495e+06	10563.3	1.38878e+07	3.14807e+07	2.52992e+07	2.44719e+07	4.72722e+07
Epyc	P70186	Epiphycan OS=Mus musculus OX=10090 GN=Epyc PE=2 SV=1	10563.3	10563.3	10563.3	10563.3	10563.3	10563.3	10563.3	10563.3	10563.3	10563.3	10563.3	10563.3	10563.3	367009	320852	375110	390826
Ern1	Q9EQY0	Serine/threonine-protein kinase/endoribonuclease IRE1 OS=Mus musculus OX=10090 GN=Ern1 PE=1 SV=1	10563.3	10563.3	10563.3	10563.3	10563.3	10563.3	10563.3	10563.3	10563.3	10563.3	10563.3	10563.3	10563.3	10563.3	422024	10563.3	10563.3
Erp44	Q9D1Q6	Endoplasmic reticulum resident protein 44 OS=Mus musculus OX=10090 GN=Erp44 PE=1 SV=1	6.54921e+06	6.75047e+06	5.10308e+06	7.98635e+06	4.91697e+06	7.92215e+06	4.96983e+06	4.85501e+06	6.64562e+06	5.62294e+06	7.99819e+06	6.42001e+06	6.98117e+06	4.19099e+06	3.60781e+06	8.36437e+06	1.43493e+07
Esd	Q9R0P3	S-formylglutathione hydrolase OS=Mus musculus OX=10090 GN=Esd PE=1 SV=1	3.8016e+06	5.65233e+06	2.11935e+06	4.61436e+06	4.32487e+06	2.15536e+06	4.29782e+06	2.98474e+06	3.76945e+06	5.24242e+06	4.01072e+06	3.68599e+06	1.34419e+07	1.32661e+07	9.01528e+06	1.6505e+07	1.26712e+07
Esp1	Q3LHH8	Exocrine gland-secreted peptide 1 OS=Mus musculus OX=10090 GN=Esp1 PE=1 SV=1	10563.3	10563.3	408040	6.88257e+06	4.14141e+06	2.73734e+06	2.15862e+07	10563.3	2.73445e+07	10563.3	4.60445e+06	4.56465e+06	10563.3	10563.3	10563.3	10563.3	10563.3
Etf1	Q8BWY3	Eukaryotic peptide chain release factor subunit 1 OS=Mus musculus OX=10090 GN=Etf1 PE=1 SV=4	10563.3	1.27745e+06	1.58687e+06	1.49815e+06	1.83719e+06	619201	2.46728e+06	1.10872e+06	1.88269e+06	1.20164e+06	2.32839e+06	517940	561689	363387	374506	859868	643300
Etfa	Q99LC5	Electron transfer flavoprotein subunit alpha, mitochondrial OS=Mus musculus OX=10090 GN=Etfa PE=1 SV=2	334670	417721	10563.3	10563.3	493347	842647	10563.3	10563.3	256253	3.51098e+06	604773	424782	824578	2.43294e+06	1.98487e+06	1.01805e+06	4.61022e+06
Etfb	Q9DCW4	Electron transfer flavoprotein subunit beta OS=Mus musculus OX=10090 GN=Etfb PE=1 SV=3	10563.3	10563.3	10563.3	10563.3	10563.3	259651	10563.3	10563.3	10563.3	729172	222810	10563.3	10563.3	10563.3	10563.3	10563.3	10563.3
Etfdh	Q921G7	Electron transfer flavoprotein-ubiquinone oxidoreductase, mitochondrial OS=Mus musculus OX=10090 GN=Etfdh PE=1 SV=1	10563.3	10563.3	10563.3	10563.3	10563.3	10563.3	10563.3	10563.3	10563.3	1.21917e+06	10563.3	10563.3	1.07627e+06	1.04051e+08	656513	5.377e+06	8.62922e+06
Exoc2	Q9D4H1	Exocyst complex component 2 OS=Mus musculus OX=10090 GN=Exoc2 PE=1 SV=1	734062	580419	10563.3	612399	10563.3	496145	860885	584120	588323	1.37724e+06	608069	886403	10563.3	10563.3	10563.3	10563.3	10563.3
Ext1	P97464	Exostosin-1 OS=Mus musculus OX=10090 GN=Ext1 PE=1 SV=1	3.74923e+06	3.90233e+06	3.45912e+06	5.74984e+06	3.05423e+06	3.82153e+06	1.93367e+06	2.16691e+06	1.86234e+06	3.54383e+06	4.83894e+06	4.72094e+06	1.74106e+07	2.01968e+07	9.29359e+06	1.69872e+07	1.81422e+07
Ext2	P70428	Exostosin-2 OS=Mus musculus OX=10090 GN=Ext2 PE=1 SV=2	2.48391e+07	2.21771e+07	2.2477e+07	2.29919e+07	2.77763e+07	2.21566e+07	2.62842e+07	3.08103e+07	1.85769e+07	2.41582e+07	2.49872e+07	2.12235e+07	8.32245e+07	1.19738e+08	1.5546e+08	8.90674e+07	7.54979e+07
Extl2	Q9ES89	Exostosin-like 2 OS=Mus musculus OX=10090 GN=Extl2 PE=1 SV=1	10563.3	10563.3	10563.3	10563.3	10563.3	10563.3	10563.3	10563.3	10563.3	10563.3	10563.3	10563.3	190192	3.04432e+06	586813	10563.3	10563.3
F10	O88947	Coagulation factor X OS=Mus musculus OX=10090 GN=F10 PE=1 SV=1	4.4416e+08	5.33062e+08	4.50278e+08	3.31015e+08	6.31724e+08	3.51869e+08	2.95728e+08	3.67073e+08	2.50148e+08	3.56642e+08	4.29924e+08	3.26318e+08	6.57349e+08	6.663e+08	5.43096e+08	5.7524e+08	7.25761e+08
F11	Q91Y47	Coagulation factor XI OS=Mus musculus OX=10090 GN=F11 PE=2 SV=2	4.40292e+07	3.59572e+07	4.83481e+07	4.43114e+07	6.05086e+07	3.07147e+07	3.67157e+07	1.27638e+07	1.84374e+07	1.05805e+07	1.06253e+07	9.66963e+06	2.7295e+06	5.48433e+06	4.78551e+06	4.45497e+06	2.08695e+06
F12	Q80YC5	Coagulation factor XII OS=Mus musculus OX=10090 GN=F12 PE=1 SV=2	1.27359e+09	8.18595e+08	7.78004e+08	6.75621e+08	5.73834e+08	6.33686e+08	5.74093e+08	5.49101e+08	5.54425e+08	4.64087e+08	1.67075e+09	1.05879e+09	8.86872e+08	8.06184e+08	4.68487e+08	7.68562e+08	7.96888e+08
F13a1	Q8BH61	Coagulation factor XIII A chain OS=Mus musculus OX=10090 GN=F13a1 PE=1 SV=3	1.36216e+09	1.19689e+09	2.66198e+09	2.99448e+09	2.61191e+09	3.31073e+09	1.66174e+09	1.38536e+09	1.17361e+09	1.60397e+09	2.26038e+09	2.26498e+09	1.6744e+09	2.48492e+09	1.97989e+09	2.10113e+09	3.11599e+08
F13b	Q07968	Coagulation factor XIII B chain OS=Mus musculus OX=10090 GN=F13b PE=1 SV=2	1.98088e+08	1.90439e+08	7.8077e+08	1.00796e+09	7.43808e+08	1.16989e+09	6.42742e+08	3.4598e+08	5.87563e+08	5.83239e+08	7.78473e+08	1.01692e+09	3.05214e+08	3.89052e+08	5.8582e+08	3.86684e+08	3.19418e+07
F2	P19221	Prothrombin OS=Mus musculus OX=10090 GN=F2 PE=1 SV=1	7.30652e+09	8.55847e+09	9.9349e+09	8.83182e+09	9.61355e+09	9.61013e+09	1.23873e+10	1.03253e+10	1.06662e+10	1.06858e+10	1.32168e+10	1.06689e+10	1.00295e+10	1.13161e+10	9.08667e+09	1.06184e+10	1.39417e+10
F5	O88783	Coagulation factor V OS=Mus musculus OX=10090 GN=F5 PE=1 SV=1	2.67137e+09	2.11504e+09	1.79709e+09	2.02339e+09	2.39162e+09	1.77046e+09	3.55443e+09	2.72258e+09	3.50574e+09	2.12992e+09	2.0249e+09	2.3271e+09	2.05022e+09	1.36157e+09	1.3334e+09	2.1726e+09	2.97928e+09
F7	P70375	Coagulation factor VII OS=Mus musculus OX=10090 GN=F7 PE=1 SV=1	1.16769e+08	1.63613e+08	1.21706e+08	1.11685e+08	1.13749e+08	1.45212e+08	2.27111e+08	1.14506e+08	1.43426e+08	1.52536e+08	1.45575e+08	1.71663e+08	6.90358e+07	1.16078e+08	9.7223e+07	6.6766e+07	8.55639e+07
F8	Q06194	Coagulation factor VIII OS=Mus musculus OX=10090 GN=F8 PE=2 SV=2	3.93659e+06	4.98896e+06	1.72391e+06	2.23871e+06	2.70932e+06	3.82032e+06	7.12047e+06	4.18333e+06	2.16596e+06	7.57631e+06	1.20373e+06	726199	1.62889e+07	1.98731e+07	2.04444e+07	2.891e+07	4.10168e+07
F9	P16294	Coagulation factor IX OS=Mus musculus OX=10090 GN=F9 PE=2 SV=3	6.861e+07	7.5902e+07	7.26828e+07	7.20922e+07	1.34848e+08	6.10414e+07	3.64629e+07	6.99963e+07	3.38527e+07	8.78589e+07	7.1729e+07	3.89698e+07	4.92093e+07	6.69803e+07	3.64502e+07	7.23607e+07	1.07798e+08
Fabp1	P12710	Fatty acid-binding protein, liver OS=Mus musculus OX=10090 GN=Fabp1 PE=1 SV=2	10563.3	10563.3	10563.3	10563.3	10563.3	10563.3	10563.3	10563.3	10563.3	10563.3	10563.3	10563.3	10563.3	10563.3	3.59382e+06	10563.3	381860
Fabp4	P04117	Fatty acid-binding protein, adipocyte OS=Mus musculus OX=10090 GN=Fabp4 PE=1 SV=3	2.15745e+06	196338	1.28256e+06	720961	595415	683143	713091	1.99609e+06	2.26223e+06	2.61418e+06	4.25085e+06	1.33854e+06	1.96763e+06	2.4739e+06	3.78116e+06	2.77744e+06	2.48701e+06
Fah	P35505	Fumarylacetoacetase OS=Mus musculus OX=10090 GN=Fah PE=1 SV=2	10563.3	10563.3	10563.3	10563.3	10563.3	10563.3	10563.3	10563.3	10563.3	10563.3	10563.3	10563.3	1.35734e+06	361863	254502	1.41559e+06	1.64094e+06
Fam151a	Q8QZW3	Protein FAM151A OS=Mus musculus OX=10090 GN=Fam151a PE=1 SV=1	10563.3	10563.3	10563.3	10563.3	10563.3	10563.3	10563.3	10563.3	10563.3	10563.3	10563.3	10563.3	1.08443e+07	5.15673e+06	5.2687e+06	1.32983e+07	1.002e+07
Fam161b	Q8CB59	Protein FAM161B OS=Mus musculus OX=10090 GN=Fam161b PE=1 SV=1	7.04935e+07	4.98994e+07	6.92022e+07	6.87792e+07	6.65701e+07	5.10535e+07	6.03728e+07	6.23318e+07	5.1254e+07	5.00579e+07	5.48434e+07	6.79932e+07	10563.3	10563.3	10563.3	10563.3	10563.3
Fam20c	Q5MJS3	Extracellular serine/threonine protein kinase FAM20C OS=Mus musculus OX=10090 GN=Fam20c PE=1 SV=1	2.28439e+06	1.27338e+06	1.92213e+06	1.24078e+06	1.00675e+06	949315	835714	1.71305e+06	662571	1.63598e+06	2.30855e+06	1.37056e+06	7.42937e+06	4.54759e+06	5.22915e+06	7.40473e+06	6.3946e+06
Fap	P97321	Prolyl endopeptidase FAP OS=Mus musculus OX=10090 GN=Fap PE=1 SV=1	8.3659e+07	1.12786e+08	9.66444e+07	1.1716e+08	1.04741e+08	2.17932e+08	5.55641e+07	2.54423e+07	3.73705e+07	4.87958e+07	6.40758e+07	8.18453e+07	4.84759e+07	5.33755e+07	4.97168e+07	5.47616e+07	5.55106e+07
Fasn	P19096	Fatty acid synthase OS=Mus musculus OX=10090 GN=Fasn PE=1 SV=2	1.36234e+07	2.88342e+07	2.32817e+07	1.68256e+07	2.096e+07	2.23671e+07	1.92921e+07	6.2017e+07	1.5325e+07	1.45437e+07	3.49027e+07	1.28394e+07	2.15624e+08	3.92171e+08	3.23529e+07	1.52702e+08	5.01435e+08
Faxc	Q3UMF9	Failed axon connections homolog OS=Mus musculus OX=10090 GN=Faxc PE=2 SV=1	1.8758e+06	1.33967e+06	1.1915e+06	1.3261e+06	1.62795e+06	996683	1.90309e+06	10563.3	3.75636e+06	1.61211e+06	1.2488e+06	1.67207e+06	10563.3	10563.3	10563.3	10563.3	10563.3
Fbln1	Q08879	Fibulin-1 OS=Mus musculus OX=10090 GN=Fbln1 PE=1 SV=2	4.50473e+08	7.08582e+08	4.53054e+08	5.78948e+08	5.01433e+08	7.58923e+08	2.81257e+08	1.72952e+08	2.51291e+08	4.144e+08	2.72767e+08	3.07548e+08	1.89154e+08	2.52482e+08	2.86829e+08	1.6864e+08	1.4348e+08
Fbln2	P37889	Fibulin-2 OS=Mus musculus OX=10090 GN=Fbln2 PE=1 SV=2	1.56592e+07	8.84309e+06	4.9543e+06	1.76966e+07	3.39528e+07	4.57007e+06	6.94495e+06	2.18173e+07	1.657e+07	5.74266e+07	4.72787e+06	1.0616e+07	533101	569969	526608	539048	1.17487e+06
Fbln5	Q9WVH9	Fibulin-5 OS=Mus musculus OX=10090 GN=Fbln5 PE=1 SV=1	3.19961e+07	3.71456e+07	3.7216e+07	4.25292e+07	3.81392e+07	4.83292e+07	4.30935e+07	2.05186e+07	2.15e+07	2.72998e+07	2.99641e+07	2.18651e+07	4.66241e+07	5.18236e+07	9.72432e+07	5.48944e+07	3.02083e+07
Fbn1	Q61554	Fibrillin-1 OS=Mus musculus OX=10090 GN=Fbn1 PE=1 SV=2	1.15095e+06	1.61261e+06	1.23995e+06	2.272e+06	1.1818e+06	1.79042e+06	1.01762e+06	458145	595058	2.35195e+06	1.13006e+06	584998	619231	655729	736700	630247	722949
Fcgr3	P08508	Low affinity immunoglobulin gamma Fc region receptor III OS=Mus musculus OX=10090 GN=Fcgr3 PE=1 SV=1	10563.3	10563.3	10563.3	10563.3	10563.3	10563.3	10563.3	10563.3	10563.3	10563.3	10563.3	10563.3	528487	10563.3	467485	609947	10563.3
Fcn1	O70165	Ficolin-1 OS=Mus musculus OX=10090 GN=Fcn1 PE=1 SV=1	6.81471e+08	8.34159e+08	8.20641e+08	7.53522e+08	8.55295e+08	1.20144e+09	5.14016e+08	5.02392e+08	3.02985e+08	6.52489e+08	5.47574e+08	4.23998e+08	6.27314e+08	7.45303e+08	3.93812e+08	4.5776e+08	4.71715e+08
Fermt3	Q8K1B8	Fermitin family homolog 3 OS=Mus musculus OX=10090 GN=Fermt3 PE=1 SV=1	6.50903e+07	1.39814e+08	1.09721e+08	1.01311e+08	5.84395e+07	4.78519e+07	4.9498e+07	3.13549e+07	5.56461e+07	4.69632e+07	1.10489e+08	2.53586e+07	5.02676e+07	2.50336e+07	2.18294e+07	5.54668e+07	1.13471e+08
Fetub	Q9QXC1	Fetuin-B OS=Mus musculus OX=10090 GN=Fetub PE=1 SV=1	3.60718e+07	2.06357e+07	3.23393e+07	2.7759e+07	2.73354e+07	2.71447e+07	5.58739e+07	1.57191e+07	7.96192e+07	1.20973e+07	2.50585e+07	4.44121e+07	8.84333e+06	2.04029e+07	5.55183e+07	1.27892e+07	4.79186e+06
Fga	E9PV24	Fibrinogen alpha chain OS=Mus musculus OX=10090 GN=Fga PE=1 SV=1	1.22082e+09	6.40279e+08	7.33336e+09	5.92275e+09	5.38085e+09	7.56578e+09	3.43977e+09	7.35815e+09	2.96277e+09	5.2881e+09	5.12057e+09	6.6919e+09	8.78778e+09	9.99403e+09	9.06583e+09	1.15646e+10	8.21243e+08
Fgb	Q8K0E8	Fibrinogen beta chain OS=Mus musculus OX=10090 GN=Fgb PE=1 SV=1	1.39194e+09	6.51827e+08	9.33392e+09	6.23465e+09	5.6024e+09	8.88508e+09	3.8866e+09	5.48732e+09	2.74644e+09	5.60448e+09	5.19623e+09	7.20132e+09	9.77272e+09	1.12157e+10	1.11396e+10	1.29228e+10	1.21636e+09
Fgd2	Q8BY35	FYVE, RhoGEF and PH domain-containing protein 2 OS=Mus musculus OX=10090 GN=Fgd2 PE=1 SV=1	233440	10563.3	406303	598487	301328	561923	530039	10563.3	556477	506315	306042	357920	10563.3	10563.3	10563.3	10563.3	10563.3
Fgd4	Q91ZT5	FYVE, RhoGEF and PH domain-containing protein 4 OS=Mus musculus OX=10090 GN=Fgd4 PE=1 SV=1	5.35347e+06	3.94182e+06	1.99265e+07	9.45887e+06	1.10036e+07	2.29412e+07	5.29808e+06	6.15785e+06	4.67151e+06	5.85112e+06	2.21559e+07	2.19934e+07	10563.3	10563.3	10563.3	10563.3	10563.3
Fgg	Q8VCM7	Fibrinogen gamma chain OS=Mus musculus OX=10090 GN=Fgg PE=1 SV=1	1.18679e+09	5.58267e+08	7.77529e+09	5.08663e+09	4.55176e+09	7.18688e+09	2.88704e+09	4.70969e+09	1.97473e+09	4.20678e+09	4.14899e+09	5.52427e+09	7.45642e+09	8.06515e+09	7.56314e+09	1.01041e+10	8.97521e+08
Fggy	A2AJL3	FGGY carbohydrate kinase domain-containing protein OS=Mus musculus OX=10090 GN=Fggy PE=1 SV=1	10563.3	10563.3	10563.3	10563.3	10563.3	10563.3	10563.3	10563.3	10563.3	10563.3	10563.3	10563.3	10563.3	10563.3	10563.3	639818	542469
Fgl1	Q71KU9	Fibrinogen-like protein 1 OS=Mus musculus OX=10090 GN=Fgl1 PE=1 SV=2	8.64385e+07	6.28122e+07	1.43209e+08	2.64352e+08	2.28294e+08	2.07848e+08	1.05145e+08	6.43553e+07	1.93876e+08	8.80836e+07	4.29119e+07	2.99766e+07	8.09828e+07	4.44584e+07	9.48452e+07	6.9485e+07	2.40699e+07
Fgl2	P12804	Fibroleukin OS=Mus musculus OX=10090 GN=Fgl2 PE=1 SV=1	10563.3	10563.3	10563.3	10563.3	10563.3	10563.3	10563.3	10563.3	10563.3	10563.3	10563.3	10563.3	10563.3	9.12569e+06	6.2708e+06	6.20999e+06	1.25902e+07
Fh	P97807	Fumarate hydratase, mitochondrial OS=Mus musculus OX=10090 GN=Fh PE=1 SV=3	258648	289049	167507	571494	10563.3	268513	432754	203752	680834	484425	320186	296913	10563.3	10563.3	10563.3	10563.3	10563.3
Fhl1	P97447	Four and a half LIM domains protein 1 OS=Mus musculus OX=10090 GN=Fhl1 PE=1 SV=3	10563.3	10563.3	10563.3	10563.3	10563.3	10563.3	10563.3	10563.3	10563.3	10563.3	10563.3	10563.3	795514	10563.3	1.05519e+06	508428	1.2867e+06
Fhl3	Q9R059	Four and a half LIM domains protein 3 OS=Mus musculus OX=10090 GN=Fhl3 PE=1 SV=2	10563.3	10563.3	774350	638100	647463	912263	574296	428126	958684	488677	883203	501481	10563.3	10563.3	10563.3	10563.3	10563.3
Fhod1	Q6P9Q4	FH1/FH2 domain-containing protein 1 OS=Mus musculus OX=10090 GN=Fhod1 PE=1 SV=3	10563.3	814016	893450	830110	178895	10563.3	10563.3	10563.3	10563.3	10563.3	10563.3	10563.3	10563.3	740702	10563.3	1.12734e+06	1.01031e+06
Fis1	Q9CQ92	Mitochondrial fission 1 protein OS=Mus musculus OX=10090 GN=Fis1 PE=1 SV=1	10563.3	10563.3	10563.3	10563.3	10563.3	10563.3	10563.3	10563.3	10563.3	10563.3	10563.3	10563.3	114306	10563.3	318682	10563.3	10563.3
Fkbp1a	P26883	Peptidyl-prolyl cis-trans isomerase FKBP1A OS=Mus musculus OX=10090 GN=Fkbp1a PE=1 SV=2	10563.3	10563.3	10563.3	655991	10563.3	10563.3	220490	10563.3	10563.3	10563.3	10563.3	236708	10563.3	10563.3	10563.3	10563.3	10563.3
Flna	Q8BTM8	Filamin-A OS=Mus musculus OX=10090 GN=Flna PE=1 SV=5	1.72238e+08	3.80734e+08	3.74229e+08	3.38498e+08	1.93631e+08	1.88827e+08	2.12888e+08	1.21827e+08	2.32002e+08	1.9561e+08	3.68376e+08	8.66934e+07	1.2206e+08	9.55139e+07	7.37502e+07	1.32471e+08	3.15896e+08
Flnb	Q80X90	Filamin-B OS=Mus musculus OX=10090 GN=Flnb PE=1 SV=3	10563.3	10563.3	10563.3	10563.3	10563.3	10563.3	10563.3	10563.3	10563.3	10563.3	10563.3	10563.3	194915	384641	10563.3	9.2249e+06	1.04792e+07
Flnc	Q8VHX6	Filamin-C OS=Mus musculus OX=10090 GN=Flnc PE=1 SV=3	5.57222e+06	6.44391e+06	1.12186e+07	9.2731e+06	6.98116e+06	1.67567e+07	1.5389e+06	402458	687309	1.00242e+06	1.6135e+06	538607	10563.3	10563.3	10563.3	10563.3	10563.3
Fn1	P11276	Fibronectin OS=Mus musculus OX=10090 GN=Fn1 PE=1 SV=4	1.97847e+10	2.23086e+10	9.25281e+09	5.13056e+09	4.42842e+09	1.0411e+10	1.17859e+10	1.84162e+10	1.25894e+10	9.71262e+09	1.60019e+10	1.89875e+10	1.45428e+10	1.75949e+10	1.35708e+10	1.28225e+10	2.55596e+10
Fn3krp	Q8K274	Ketosamine-3-kinase OS=Mus musculus OX=10090 GN=Fn3krp PE=1 SV=2	1.58578e+06	2.40924e+06	3.35472e+06	2.83985e+06	6.19523e+06	2.07463e+06	829069	2.856e+06	622970	1.00676e+06	2.83305e+06	1.16126e+06	10563.3	10563.3	10563.3	10563.3	10563.3
Fnbp1	Q80TY0	Formin-binding protein 1 OS=Mus musculus OX=10090 GN=Fnbp1 PE=1 SV=2	282806	1.02617e+06	807981	973656	393149	339841	430743	222632	249250	535342	780172	171005	10563.3	10563.3	10563.3	10563.3	10563.3
Frmpd1	A2AKB4	FERM and PDZ domain-containing protein 1 OS=Mus musculus OX=10090 GN=Frmpd1 PE=1 SV=1	10563.3	10563.3	10563.3	10563.3	10563.3	10563.3	10563.3	10563.3	10563.3	10563.3	10563.3	10563.3	1.10395e+07	1.60455e+07	2.49224e+07	1.21029e+07	9.24131e+06
Fstl1	Q62356	Follistatin-related protein 1 OS=Mus musculus OX=10090 GN=Fstl1 PE=1 SV=2	4.49667e+06	4.06721e+06	3.19331e+06	4.63688e+06	3.54949e+06	4.55906e+06	415673	1.71362e+06	2.03087e+06	1.51834e+06	1.98879e+06	1.24456e+06	937943	689959	502483	983974	953833
Ftcd	Q91XD4	Formimidoyltransferase-cyclodeaminase OS=Mus musculus OX=10090 GN=Ftcd PE=1 SV=1	1.96292e+06	1.48206e+06	2.09177e+06	2.01786e+06	1.75873e+06	4.57852e+06	1.56008e+06	8.1037e+06	800845	6.04639e+06	4.74616e+06	1.83914e+06	1.06144e+07	1.51806e+07	1.11901e+06	7.75363e+06	1.42628e+07
Fth1	P09528	Ferritin heavy chain OS=Mus musculus OX=10090 GN=Fth1 PE=1 SV=2	1.06045e+07	1.52824e+07	6.52167e+06	7.68734e+06	5.17572e+06	3.9511e+06	6.33344e+06	7.03594e+06	7.78161e+06	2.43843e+06	5.99234e+06	3.45835e+06	6.53081e+06	5.86241e+06	7.79601e+06	7.65537e+06	1.13948e+07
Ftl1	P29391	Ferritin light chain 1 OS=Mus musculus OX=10090 GN=Ftl1 PE=1 SV=2	8.67169e+07	1.04847e+08	6.10428e+07	8.42831e+07	1.07555e+08	4.45588e+07	5.85835e+07	5.71587e+07	5.43727e+07	3.07815e+07	5.08037e+07	2.89175e+07	4.84398e+07	2.58298e+07	1.32536e+07	4.50354e+07	6.73162e+07
Fuca1	Q99LJ1	Tissue alpha-L-fucosidase OS=Mus musculus OX=10090 GN=Fuca1 PE=1 SV=1	3.94396e+06	5.52641e+06	6.64737e+06	7.25779e+06	5.18226e+06	7.59647e+06	6.11169e+06	8.12397e+06	5.80848e+06	6.8138e+06	1.28431e+07	1.43272e+07	1.53061e+07	1.93233e+07	1.5128e+07	1.4747e+07	1.27829e+07
Fut8	Q9WTS2	Alpha-(1,6)-fucosyltransferase OS=Mus musculus OX=10090 GN=Fut8 PE=1 SV=2	10563.3	10563.3	10563.3	10563.3	10563.3	10563.3	10563.3	10563.3	10563.3	10563.3	10563.3	10563.3	297871	10563.3	10563.3	10563.3	408312
Fyb1	O35601	FYN-binding protein 1 OS=Mus musculus OX=10090 GN=Fyb1 PE=1 SV=2	10563.3	10563.3	10563.3	345879	10563.3	10563.3	10563.3	10563.3	10563.3	180008	435191	10563.3	10563.3	10563.3	10563.3	10563.3	10563.3
G6pdx	Q00612	Glucose-6-phosphate 1-dehydrogenase X OS=Mus musculus OX=10090 GN=G6pdx PE=1 SV=3	5.80574e+06	1.00414e+07	1.13027e+07	5.94575e+06	1.45957e+07	7.48808e+06	5.8929e+06	1.48149e+06	6.25414e+06	8.59418e+06	1.47232e+07	1.95649e+06	1.87148e+07	6.66743e+06	1.0249e+07	1.16879e+07	1.34673e+07
Gaa	P70699	Lysosomal alpha-glucosidase OS=Mus musculus OX=10090 GN=Gaa PE=1 SV=2	10563.3	317300	10563.3	453684	10563.3	10563.3	242100	10563.3	10563.3	10563.3	10563.3	10563.3	360854	10563.3	10563.3	400699	526001
Gal	P47212	Galanin peptides OS=Mus musculus OX=10090 GN=Gal PE=2 SV=1	10563.3	10563.3	10563.3	10563.3	10563.3	10563.3	10563.3	10563.3	10563.3	10563.3	10563.3	10563.3	1.88015e+06	10563.3	10563.3	1.74642e+06	10563.3
Galc	P54818	Galactocerebrosidase OS=Mus musculus OX=10090 GN=Galc PE=1 SV=2	536418	521061	868266	490992	1.26886e+06	435731	280073	2.79509e+06	1.26998e+06	10563.3	676832	530842	2.45559e+06	2.37623e+06	2.2235e+06	1.88325e+06	2.9706e+06
Galk1	Q9R0N0	Galactokinase OS=Mus musculus OX=10090 GN=Galk1 PE=1 SV=2	3.11663e+07	2.18863e+07	1.97579e+07	2.9294e+07	1.23191e+07	2.05412e+07	2.38861e+07	6.36504e+06	2.01551e+07	1.74043e+06	3.29984e+07	4.35843e+07	3.36206e+06	1.25546e+06	8.35976e+06	5.76683e+06	1.38547e+07
Galnt2	Q6PB93	Polypeptide N-acetylgalactosaminyltransferase 2 OS=Mus musculus OX=10090 GN=Galnt2 PE=1 SV=1	1.53436e+06	1.33084e+06	943224	722597	712696	576940	804436	1.33527e+06	455113	1.23008e+06	461026	398410	1.50407e+06	10563.3	124428	440086	1.46552e+06
Ganab	Q8BHN3	Neutral alpha-glucosidase AB OS=Mus musculus OX=10090 GN=Ganab PE=1 SV=1	2.28927e+07	3.49259e+07	4.00637e+07	3.23905e+07	2.01141e+07	3.11589e+07	2.95643e+07	2.64603e+07	3.41346e+07	4.70406e+07	2.95815e+07	2.73112e+07	3.46346e+07	5.98599e+07	3.44463e+07	3.85664e+07	5.38845e+07
Gapdh	P16858	Glyceraldehyde-3-phosphate dehydrogenase OS=Mus musculus OX=10090 GN=Gapdh PE=1 SV=2	1.52929e+08	2.08836e+08	1.3476e+08	1.82536e+08	1.98033e+08	8.30168e+07	1.38452e+08	1.44053e+08	9.45281e+07	1.5431e+08	1.77166e+08	4.84587e+07	1.44653e+08	5.69358e+07	1.29139e+08	1.58534e+08	3.00052e+08
Gars1	Q9CZD3	Glycine--tRNA ligase OS=Mus musculus OX=10090 GN=Gars1 PE=1 SV=1	1.71219e+06	2.02637e+06	2.08355e+06	2.60039e+06	1.91119e+06	1.3777e+06	2.07336e+06	2.10838e+06	3.04573e+06	3.99252e+06	4.75917e+06	2.25875e+06	636194	10563.3	1.27986e+06	913099	1.33614e+06
Gas6	Q61592	Growth arrest-specific protein 6 OS=Mus musculus OX=10090 GN=Gas6 PE=2 SV=2	1.52837e+06	1.43012e+06	1.38303e+06	809060	1.38737e+06	2.09657e+06	669847	489431	267837	1.01041e+06	1.01948e+06	926419	487388	405298	10563.3	319068	641001
Gba	P17439	Lysosomal acid glucosylceramidase OS=Mus musculus OX=10090 GN=Gba PE=1 SV=1	1.27006e+06	2.01776e+06	795903	1.04893e+06	1.44468e+06	829315	1.14688e+06	1.35724e+06	1.53988e+06	1.66156e+06	365464	10563.3	1.37968e+06	762194	10563.3	673470	2.37827e+06
Gbe1	Q9D6Y9	1,4-alpha-glucan-branching enzyme OS=Mus musculus OX=10090 GN=Gbe1 PE=1 SV=1	169034	154896	10563.3	166119	10563.3	10563.3	123606	1.07314e+06	628841	10563.3	1.26197e+06	142129	6.81084e+06	1.20012e+07	2.48501e+06	6.42717e+06	1.77003e+07
Gc	P21614	Vitamin D-binding protein OS=Mus musculus OX=10090 GN=Gc PE=1 SV=2	3.06172e+09	4.09241e+09	4.81044e+09	5.45056e+09	4.63476e+09	4.66985e+09	4.7508e+09	3.32957e+09	6.80233e+09	4.64238e+09	6.74501e+09	2.58502e+09	1.33598e+09	1.59669e+09	1.92652e+09	1.42012e+09	2.52767e+09
Gcdh	Q60759	Glutaryl-CoA dehydrogenase, mitochondrial OS=Mus musculus OX=10090 GN=Gcdh PE=1 SV=2	10563.3	10563.3	10563.3	10563.3	10563.3	10563.3	10563.3	281946	10563.3	1.07292e+06	380074	10563.3	10563.3	332690	10563.3	252742	146288
Gclm	O09172	Glutamate--cysteine ligase regulatory subunit OS=Mus musculus OX=10090 GN=Gclm PE=1 SV=1	8.51536e+06	1.22731e+07	1.24791e+07	5.63427e+06	2.35802e+07	4.99268e+06	5.83453e+06	3.15949e+06	5.97171e+06	5.74767e+06	1.35882e+07	1.91811e+06	3.97429e+06	3.04359e+06	4.45055e+06	7.10302e+06	1.19393e+07
Gda	Q9R111	Guanine deaminase OS=Mus musculus OX=10090 GN=Gda PE=1 SV=1	2.27401e+07	1.96983e+07	8.86035e+06	6.8805e+06	2.70725e+07	1.24955e+07	7.61608e+06	3.74316e+06	6.69708e+06	6.86886e+06	7.41731e+06	3.81089e+06	8.4564e+06	9.26497e+06	5.28491e+06	1.06651e+07	9.29423e+06
Gdf2	Q9WV56	Growth/differentiation factor 2 OS=Mus musculus OX=10090 GN=Gdf2 PE=1 SV=2	274656	10563.3	10563.3	10563.3	377539	10563.3	10563.3	10563.3	10563.3	10563.3	10563.3	10563.3	888121	246427	10563.3	863276	2.21611e+06
Gdi1	P50396	Rab GDP dissociation inhibitor alpha OS=Mus musculus OX=10090 GN=Gdi1 PE=1 SV=3	9.84262e+06	1.39628e+07	7.13575e+06	1.10515e+07	5.66495e+06	6.93677e+06	7.58579e+06	2.30215e+06	3.54915e+06	7.60618e+06	8.09531e+06	3.29281e+06	2.48197e+06	1.27654e+06	1.78834e+06	1.92249e+06	2.98319e+06
Gdi2	Q61598	Rab GDP dissociation inhibitor beta OS=Mus musculus OX=10090 GN=Gdi2 PE=1 SV=1	389221	416575	10563.3	459126	10563.3	10563.3	10563.3	10563.3	276100	413960	530441	10563.3	10563.3	10563.3	10563.3	10563.3	10563.3
Get3	O54984	ATPase GET3 OS=Mus musculus OX=10090 GN=Get3 PE=1 SV=2	232600	364748	344013	488580	227456	219111	313554	168074	10563.3	250067	363389	10563.3	10563.3	10563.3	10563.3	10563.3	10563.3
Gfap	P03995	Glial fibrillary acidic protein OS=Mus musculus OX=10090 GN=Gfap PE=1 SV=4	10563.3	10563.3	10563.3	10563.3	10563.3	10563.3	10563.3	10563.3	10563.3	10563.3	10563.3	10563.3	2.47976e+06	1.86412e+06	2.75968e+06	3.95085e+06	3.15652e+06
Ggh	Q9Z0L8	Gamma-glutamyl hydrolase OS=Mus musculus OX=10090 GN=Ggh PE=1 SV=2	8.38155e+06	9.09119e+06	4.00801e+06	1.13836e+07	8.59244e+06	7.21953e+06	4.99252e+06	949843	7.03419e+06	5.10138e+06	4.26065e+06	2.69614e+06	5.83535e+06	4.40944e+06	2.76472e+06	6.62707e+06	7.72314e+06
Ghr	P16882	Growth hormone receptor OS=Mus musculus OX=10090 GN=Ghr PE=1 SV=1	10563.3	10563.3	338684	728879	457009	402648	10563.3	10563.3	10563.3	10563.3	388810	468664	10563.3	10563.3	10563.3	10563.3	10563.3
Gip	P48756	Gastric inhibitory polypeptide OS=Mus musculus OX=10090 GN=Gip PE=2 SV=2	1.7238e+06	794586	1.3353e+06	1.30524e+06	2.14697e+06	1.54145e+06	3.90167e+06	10563.3	2.48907e+06	1.11505e+06	2.49301e+06	2.42425e+06	10563.3	10563.3	10563.3	10563.3	10563.3
Gk	Q64516	Glycerol kinase OS=Mus musculus OX=10090 GN=Gk PE=1 SV=2	10563.3	10563.3	10563.3	10563.3	10563.3	10563.3	10563.3	10563.3	10563.3	10563.3	10563.3	10563.3	4.53525e+07	6.20049e+07	8.2194e+06	2.86279e+08	3.27633e+07
Gkn2	Q9CQS6	Gastrokine-2 OS=Mus musculus OX=10090 GN=Gkn2 PE=1 SV=1	10563.3	10563.3	622275	10563.3	10563.3	10563.3	1.11034e+06	836193	10563.3	907044	378637	10563.3	10563.3	10563.3	10563.3	10563.3	10563.3
Glg1	Q61543	Golgi apparatus protein 1 OS=Mus musculus OX=10090 GN=Glg1 PE=1 SV=1	1.91973e+06	2.67188e+06	1.92892e+06	2.83969e+06	1.25648e+06	2.64138e+06	2.02581e+06	1.22739e+06	1.5248e+06	2.70468e+06	1.53405e+06	1.32059e+06	10563.3	10563.3	10563.3	10563.3	345657
Glo1	Q9CPU0	Lactoylglutathione lyase OS=Mus musculus OX=10090 GN=Glo1 PE=1 SV=3	234921	583261	474075	511138	613705	159162	10563.3	517824	10563.3	484549	831098	10563.3	538008	301334	1.40719e+06	458559	953269
Glrx3	Q9CQM9	Glutaredoxin-3 OS=Mus musculus OX=10090 GN=Glrx3 PE=1 SV=1	1.45954e+06	943185	1.33734e+06	1.85738e+06	2.30928e+06	10563.3	958192	1.70584e+06	580142	1.74496e+06	1.84085e+06	10563.3	572104	279693	615452	738539	1.03895e+06
Gltpd2	Q8K0R6	Glycolipid transfer protein domain-containing protein 2 OS=Mus musculus OX=10090 GN=Gltpd2 PE=1 SV=1	1.63668e+06	3.51738e+06	2.85115e+06	3.0073e+06	2.90262e+06	2.74259e+06	3.46909e+06	951290	2.71023e+06	3.22431e+06	2.90153e+06	3.50928e+06	2.47919e+06	2.79382e+06	3.67914e+06	3.48461e+06	2.10328e+06
Glud1	P26443	Glutamate dehydrogenase 1, mitochondrial OS=Mus musculus OX=10090 GN=Glud1 PE=1 SV=1	299596	298287	10563.3	1.49699e+06	10563.3	10563.3	572650	10563.3	426850	4.08844e+06	10563.3	187360	10563.3	10563.3	800070	426082	405381
Glul	P15105	Glutamine synthetase OS=Mus musculus OX=10090 GN=Glul PE=1 SV=6	438115	588425	827544	6.82703e+06	742551	3.29242e+06	1.74645e+06	10563.3	10563.3	1.30585e+06	1.53789e+06	596464	10563.3	10563.3	10563.3	10563.3	10563.3
Gm10881	P01642	Ig kappa chain V-V region L7 (Fragment) OS=Mus musculus OX=10090 GN=Gm10881 PE=1 SV=1	3.57486e+07	5.90398e+07	6.209e+07	4.06258e+07	6.22811e+07	6.94289e+07	6.02841e+07	5.07395e+07	1.23578e+08	2.13822e+08	4.18123e+07	6.69592e+07	7.14973e+07	1.81215e+08	1.13141e+08	4.10484e+07	6.15413e+07
Gm5571	P01639	Ig kappa chain V-V region MOPC 41 OS=Mus musculus OX=10090 GN=Gm5571 PE=1 SV=1	3.7156e+07	5.41857e+07	2.73062e+07	2.09953e+07	3.88715e+07	2.4509e+07	5.31961e+07	6.01857e+07	1.42077e+08	1.70168e+08	3.35703e+07	5.67678e+07	8.86583e+07	1.33827e+08	1.87759e+08	5.36546e+07	6.87561e+07
Gm5629	P06327	Ig heavy chain V region VH558 A1/A4 OS=Mus musculus OX=10090 GN=Gm5629 PE=2 SV=1	1.24039e+08	6.00193e+07	5.83758e+07	3.18735e+07	5.41419e+07	4.55075e+07	2.93181e+08	4.6118e+07	2.88342e+08	1.97469e+08	4.1738e+07	1.42618e+08	7.07989e+07	2.2368e+08	4.81065e+08	6.52412e+07	5.4508e+07
Gm94	Q3V2D2	Uncharacterized protein C5orf46 homolog OS=Mus musculus OX=10090 GN=Gm94 PE=3 SV=1	10563.3	10563.3	10563.3	10563.3	10563.3	10563.3	10563.3	10563.3	10563.3	10563.3	10563.3	10563.3	3.52232e+06	1.17998e+06	1.20694e+06	2.37123e+06	2.21639e+06
Gmfb	Q9CQI3	Glia maturation factor beta OS=Mus musculus OX=10090 GN=Gmfb PE=1 SV=3	10563.3	10563.3	10563.3	362142	264988	10563.3	10563.3	10563.3	10563.3	447197	678630	10563.3	10563.3	10563.3	10563.3	10563.3	10563.3
Gmfg	Q9ERL7	Glia maturation factor gamma OS=Mus musculus OX=10090 GN=Gmfg PE=1 SV=1	10563.3	10563.3	10563.3	10563.3	10563.3	10563.3	10563.3	10563.3	10563.3	10563.3	10563.3	10563.3	1.18908e+06	443258	1.44654e+06	1.49704e+06	2.23744e+06
Gmppb	Q8BTZ7	Mannose-1-phosphate guanyltransferase beta OS=Mus musculus OX=10090 GN=Gmppb PE=1 SV=1	274387	6.90886e+06	10563.3	268993	439366	10563.3	10563.3	10563.3	10563.3	10563.3	10563.3	10563.3	10563.3	10563.3	10563.3	10563.3	10563.3
Gmpr	Q9DCZ1	GMP reductase 1 OS=Mus musculus OX=10090 GN=Gmpr PE=1 SV=1	10563.3	10563.3	10563.3	10563.3	10563.3	10563.3	10563.3	200029	10563.3	10563.3	10563.3	10563.3	10563.3	10563.3	10563.3	367642	652918
Gnao1	P18872	Guanine nucleotide-binding protein G(o) subunit alpha OS=Mus musculus OX=10090 GN=Gnao1 PE=1 SV=3	381381	10563.3	488809	1.11592e+07	10563.3	872778	7.82837e+06	667196	918077	8.531e+06	420463	778139	10563.3	10563.3	10563.3	10563.3	10563.3
Gnas	P63094	Guanine nucleotide-binding protein G(s) subunit alpha isoforms short OS=Mus musculus OX=10090 GN=Gnas PE=1 SV=1	10563.3	10563.3	10563.3	10563.3	10563.3	10563.3	10563.3	10563.3	10563.3	10563.3	10563.3	10563.3	368456	10563.3	10563.3	10563.3	833720
Gnaz	O70443	Guanine nucleotide-binding protein G(z) subunit alpha OS=Mus musculus OX=10090 GN=Gnaz PE=1 SV=4	10563.3	10563.3	366229	435524	10563.3	10563.3	10563.3	1.83026e+06	10563.3	1.44856e+06	884559	10563.3	1.48052e+06	1.24124e+06	10563.3	1.54295e+06	1.17973e+06
Gnb1	P62874	Guanine nucleotide-binding protein G(I)/G(S)/G(T) subunit beta-1 OS=Mus musculus OX=10090 GN=Gnb1 PE=1 SV=3	853258	10563.3	2.91957e+06	1.04091e+06	1.6827e+06	1.77306e+06	406291	1.16647e+06	439151	1.07357e+06	3.43349e+06	962818	1.19004e+06	1.58618e+06	1.51711e+06	1.42888e+06	2.17604e+06
Gnb2	P62880	Guanine nucleotide-binding protein G(I)/G(S)/G(T) subunit beta-2 OS=Mus musculus OX=10090 GN=Gnb2 PE=1 SV=3	3.76574e+09	8.86235e+06	1.021e+07	2.8597e+09	3.50274e+09	2.80722e+09	4.10832e+09	2.72987e+09	4.27426e+09	3.55455e+09	3.17603e+09	3.19725e+09	1.07882e+07	9.80511e+06	4.27007e+06	6.26833e+06	1.48038e+07
Gng5	Q80SZ7	Guanine nucleotide-binding protein G(I)/G(S)/G(O) subunit gamma-5 OS=Mus musculus OX=10090 GN=Gng5 PE=1 SV=2	319606	935485	707976	577159	270665	527310	369615	724666	10563.3	263512	645821	327801	10563.3	10563.3	10563.3	10563.3	10563.3
Gnmt	Q9QXF8	Glycine N-methyltransferase OS=Mus musculus OX=10090 GN=Gnmt PE=1 SV=3	10563.3	10563.3	10563.3	10563.3	10563.3	10563.3	10563.3	4.19597e+06	10563.3	762280	3.21157e+06	10563.3	2.91771e+06	5.1231e+06	10563.3	3.05004e+06	2.06391e+06
Gnpda1	O88958	Glucosamine-6-phosphate isomerase 1 OS=Mus musculus OX=10090 GN=Gnpda1 PE=1 SV=3	5.48701e+06	5.44801e+06	5.00274e+06	3.91469e+06	5.76488e+06	6.81646e+06	2.63016e+06	556213	1.19765e+06	1.95236e+06	3.57594e+06	1.40985e+06	482338	391992	10563.3	488421	661368
Gnpda2	Q9CRC9	Glucosamine-6-phosphate isomerase 2 OS=Mus musculus OX=10090 GN=Gnpda2 PE=1 SV=1	433266	282078	292305	361049	10563.3	328856	10563.3	10563.3	10563.3	10563.3	10563.3	10563.3	10563.3	10563.3	10563.3	10563.3	10563.3
Gnptg	Q6S5C2	N-acetylglucosamine-1-phosphotransferase subunit gamma OS=Mus musculus OX=10090 GN=Gnptg PE=1 SV=1	862827	330243	365152	325407	642138	424012	10563.3	498851	241189	1.19332e+06	748239	10563.3	10563.3	10563.3	10563.3	10563.3	10563.3
Golm1	Q91XA2	Golgi membrane protein 1 OS=Mus musculus OX=10090 GN=Golm1 PE=1 SV=2	1.30599e+06	1.39615e+06	10563.3	10563.3	10563.3	10563.3	10563.3	10563.3	10563.3	10563.3	10563.3	505199	10563.3	410698	306615	10563.3	1.29873e+06
Got1	P05201	Aspartate aminotransferase, cytoplasmic OS=Mus musculus OX=10090 GN=Got1 PE=1 SV=3	10563.3	547306	393057	705332	10563.3	6.68431e+06	10563.3	10563.3	10563.3	854296	506492	10563.3	10563.3	10563.3	10563.3	10563.3	10563.3
Got2	P05202	Aspartate aminotransferase, mitochondrial OS=Mus musculus OX=10090 GN=Got2 PE=1 SV=1	117928	519105	576622	3.26479e+06	10563.3	495713	595700	10563.3	685930	653792	510548	10563.3	10563.3	10563.3	10563.3	10563.3	10563.3
Gp1ba	O35930	Platelet glycoprotein Ib alpha chain OS=Mus musculus OX=10090 GN=Gp1ba PE=1 SV=2	3.23673e+06	5.75337e+06	5.89639e+06	8.80473e+06	5.1685e+06	6.69213e+06	6.27365e+06	7.54951e+06	6.90618e+06	6.09239e+06	4.27483e+06	3.41388e+06	2.34237e+08	1.28851e+08	1.49634e+08	4.12405e+06	2.62184e+06
Gp5	O08742	Platelet glycoprotein V OS=Mus musculus OX=10090 GN=Gp5 PE=1 SV=1	830857	823714	651725	650554	856611	493266	703708	244818	718783	568028	436875	335186	10563.3	10563.3	10563.3	10563.3	10563.3
Gpd1	P13707	Glycerol-3-phosphate dehydrogenase [NAD(+)], cytoplasmic OS=Mus musculus OX=10090 GN=Gpd1 PE=1 SV=3	1.03948e+06	643386	1.51029e+06	493011	1.17145e+06	2.26319e+06	2.13308e+06	5.91353e+06	10563.3	5.87689e+06	1.75409e+07	639793	3.93117e+06	1.64653e+07	1.58854e+06	4.00945e+06	1.02148e+07
Gpd2	Q64521	Glycerol-3-phosphate dehydrogenase, mitochondrial OS=Mus musculus OX=10090 GN=Gpd2 PE=1 SV=2	10563.3	10563.3	275248	10563.3	10563.3	10563.3	10563.3	10563.3	10563.3	10563.3	10563.3	10563.3	10563.3	10563.3	10563.3	10563.3	10563.3
Gpi	P06745	Glucose-6-phosphate isomerase OS=Mus musculus OX=10090 GN=Gpi PE=1 SV=4	10563.3	10563.3	10563.3	716040	10563.3	10563.3	10563.3	10563.3	10563.3	10563.3	10563.3	10563.3	10563.3	10563.3	10563.3	10563.3	10563.3
Gpld1	O70362	Phosphatidylinositol-glycan-specific phospholipase D OS=Mus musculus OX=10090 GN=Gpld1 PE=1 SV=1	5.29694e+09	6.44064e+09	6.61908e+09	7.1261e+09	7.21377e+09	6.39193e+09	7.52259e+09	9.68553e+09	7.45679e+09	1.00166e+10	9.80269e+09	1.2685e+10	4.46271e+09	6.43084e+09	5.65146e+09	4.46706e+09	4.26998e+09
Gpm6a	P35802	Neuronal membrane glycoprotein M6-a OS=Mus musculus OX=10090 GN=Gpm6a PE=1 SV=1	10563.3	10563.3	351670	7.94746e+06	157882	10563.3	10563.3	10563.3	10563.3	560744	10563.3	10563.3	10563.3	10563.3	10563.3	10563.3	10563.3
Gpm6b	P35803	Neuronal membrane glycoprotein M6-b OS=Mus musculus OX=10090 GN=Gpm6b PE=1 SV=2	10563.3	10563.3	10563.3	684862	10563.3	10563.3	10563.3	10563.3	10563.3	4.66373e+06	10563.3	10563.3	10563.3	10563.3	10563.3	10563.3	10563.3
Gpr45	Q9EQQ4	Probable G-protein coupled receptor 45 OS=Mus musculus OX=10090 GN=Gpr45 PE=2 SV=1	10563.3	10563.3	10563.3	10563.3	10563.3	10563.3	10563.3	10563.3	10563.3	10563.3	10563.3	10563.3	10563.3	10563.3	3.71098e+06	10563.3	10563.3
Gps1	Q99LD4	COP9 signalosome complex subunit 1 OS=Mus musculus OX=10090 GN=Gps1 PE=1 SV=1	1.48046e+06	2.69674e+06	2.66409e+06	2.10224e+06	3.19362e+06	1.52655e+06	796809	304061	727391	1.09888e+06	1.17049e+06	292041	1.84809e+06	2.90617e+06	1.24332e+06	2.86461e+06	4.03402e+06
Gpx1	P11352	Glutathione peroxidase 1 OS=Mus musculus OX=10090 GN=Gpx1 PE=1 SV=2	4.29506e+06	1.20871e+07	6.7381e+06	6.295e+06	1.37253e+07	2.95356e+06	4.63454e+06	2.21469e+06	4.27688e+06	5.26341e+06	1.26374e+07	3.49841e+06	966106	1.18278e+06	341068	2.3789e+06	1.33218e+06
Gpx3	P46412	Glutathione peroxidase 3 OS=Mus musculus OX=10090 GN=Gpx3 PE=1 SV=2	4.32374e+09	2.41352e+09	4.66791e+09	4.00151e+09	5.74315e+09	5.59536e+09	1.22918e+09	5.97373e+09	1.93659e+09	5.89123e+09	3.77444e+09	3.25045e+09	2.23745e+09	5.42434e+09	1.81205e+09	4.47521e+09	5.21383e+09
Gpx4	O70325	Phospholipid hydroperoxide glutathione peroxidase OS=Mus musculus OX=10090 GN=Gpx4 PE=1 SV=4	828599	959475	1.6521e+06	1.22886e+06	581579	665665	417267	399810	10563.3	1.034e+06	2.54708e+06	10563.3	2.191e+06	1.95295e+06	1.58439e+06	1.09719e+06	883230
Gpx5	P21765	Epididymal secretory glutathione peroxidase OS=Mus musculus OX=10090 GN=Gpx5 PE=2 SV=3	6.00836e+06	7.95414e+06	6.62892e+06	4.37999e+06	5.80569e+06	5.82983e+06	784314	3.77072e+06	10563.3	5.26147e+06	329468	10563.3	10563.3	10563.3	10563.3	10563.3	10563.3
Grb2	Q60631	Growth factor receptor-bound protein 2 OS=Mus musculus OX=10090 GN=Grb2 PE=1 SV=1	10563.3	845084	1.06035e+06	1.55531e+06	387957	687198	511798	10563.3	734451	492880	1.80984e+06	10563.3	374653	10563.3	10563.3	400273	567275
Grm7	Q68ED2	Metabotropic glutamate receptor 7 OS=Mus musculus OX=10090 GN=Grm7 PE=1 SV=1	10563.3	10563.3	10563.3	10563.3	10563.3	10563.3	10563.3	10563.3	10563.3	10563.3	10563.3	10563.3	490287	322755	10563.3	547978	740063
Grn	P28798	Progranulin OS=Mus musculus OX=10090 GN=Grn PE=1 SV=2	5.00516e+07	5.01641e+07	3.59158e+07	5.18473e+07	6.26531e+07	3.96989e+07	1.86021e+07	1.32976e+07	2.99464e+07	3.9625e+07	2.64606e+07	2.12054e+07	3.72153e+06	5.57358e+06	2.62991e+06	4.52871e+06	3.92058e+06
Gsn	P13020	Gelsolin OS=Mus musculus OX=10090 GN=Gsn PE=1 SV=3	1.74525e+09	2.11582e+09	1.9543e+09	3.23531e+09	1.2481e+09	3.49928e+09	1.7082e+09	1.61804e+09	1.96323e+09	2.7193e+09	2.65894e+09	3.15327e+09	2.86759e+09	3.07783e+09	3.87199e+09	3.18435e+09	1.14496e+09
Gspt1	Q8R050	Eukaryotic peptide chain release factor GTP-binding subunit ERF3A OS=Mus musculus OX=10090 GN=Gspt1 PE=1 SV=2	247380	632723	613928	255088	925941	10563.3	435040	10563.3	906407	503153	618162	10563.3	10563.3	10563.3	10563.3	10563.3	10563.3
Gss	P51855	Glutathione synthetase OS=Mus musculus OX=10090 GN=Gss PE=1 SV=1	1.0368e+07	1.65773e+07	1.7834e+07	1.23223e+07	1.24907e+07	1.7375e+07	7.76789e+06	1.27521e+06	7.3762e+06	1.60648e+07	2.14979e+07	1.78741e+07	3.00369e+07	1.41242e+07	8.2713e+06	2.13571e+07	3.58082e+07
Gsta3	P30115	Glutathione S-transferase A3 OS=Mus musculus OX=10090 GN=Gsta3 PE=1 SV=2	10563.3	10563.3	10563.3	10563.3	10563.3	10563.3	10563.3	458780	187859	10563.3	508875	10563.3	10563.3	10563.3	823154	704284	988301
Gstk1	Q9DCM2	Glutathione S-transferase kappa 1 OS=Mus musculus OX=10090 GN=Gstk1 PE=1 SV=3	10563.3	10563.3	10563.3	10563.3	10563.3	10563.3	10563.3	10563.3	10563.3	10563.3	10563.3	10563.3	10563.3	10563.3	10563.3	10563.3	305318
Gstm1	P10649	Glutathione S-transferase Mu 1 OS=Mus musculus OX=10090 GN=Gstm1 PE=1 SV=2	284475	1.98107e+06	10563.3	8.71003e+06	396036	1.2333e+06	1.2844e+06	2.52706e+06	2.39568e+06	880225	5.13464e+06	2.43734e+06	3.66923e+07	1.0152e+08	8.56363e+07	4.67545e+07	4.93113e+07
Gstm3	P19639	Glutathione S-transferase Mu 3 OS=Mus musculus OX=10090 GN=Gstm3 PE=1 SV=2	10563.3	10563.3	10563.3	10563.3	10563.3	10563.3	10563.3	10563.3	10563.3	10563.3	10563.3	10563.3	10563.3	1.40495e+06	3.5e+06	9.0327e+06	7.89359e+06
Gstp1	P19157	Glutathione S-transferase P 1 OS=Mus musculus OX=10090 GN=Gstp1 PE=1 SV=2	4.45627e+06	6.11077e+06	3.16048e+06	9.80441e+06	1.13304e+07	393229	1.16947e+07	8.98158e+06	2.87771e+07	1.09274e+07	6.38757e+06	8.80266e+06	1.91608e+06	3.03296e+06	4.06599e+06	7.31143e+06	6.64294e+06
Gstt1	Q64471	Glutathione S-transferase theta-1 OS=Mus musculus OX=10090 GN=Gstt1 PE=1 SV=4	434849	286999	10563.3	10563.3	10563.3	10563.3	527168	657382	10563.3	10563.3	377137	10563.3	2.28465e+06	2.10351e+06	5.12886e+06	3.98465e+06	6.41272e+06
Gstz1	Q9WVL0	Maleylacetoacetate isomerase OS=Mus musculus OX=10090 GN=Gstz1 PE=1 SV=1	301554	586170	231335	390396	468273	780711	87608.7	2.49158e+06	10563.3	1.55886e+06	2.49888e+06	389802	2.45821e+06	6.32514e+06	3.27634e+07	1.49651e+07	3.14727e+07
Gucy1a1	Q9ERL9	Guanylate cyclase soluble subunit alpha-1 OS=Mus musculus OX=10090 GN=Gucy1a1 PE=1 SV=2	436613	392286	302000	262941	10563.3	10563.3	205601	405381	175231	10563.3	230614	10563.3	10563.3	10563.3	294326	10563.3	556621
Gucy1b1	O54865	Guanylate cyclase soluble subunit beta-1 OS=Mus musculus OX=10090 GN=Gucy1b1 PE=1 SV=1	1.88642e+07	1.29699e+07	1.28753e+07	1.04266e+07	1.2272e+07	7.95323e+06	4.68873e+06	10563.3	8.85013e+06	2.89032e+06	7.64051e+06	7.16938e+06	10563.3	10563.3	10563.3	10563.3	10563.3
Gys1	Q9Z1E4	Glycogen [starch] synthase, muscle OS=Mus musculus OX=10090 GN=Gys1 PE=1 SV=2	333553	631638	459607	445215	822997	601547	10563.3	407080	10563.3	10563.3	10563.3	10563.3	10563.3	10563.3	10563.3	10563.3	10563.3
H1-4	P43274	Histone H1.4 OS=Mus musculus OX=10090 GN=H1-4 PE=1 SV=2	537485	10563.3	10563.3	473809	10563.3	10563.3	10563.3	168741	93837.1	659252	10563.3	270314	244421	867554	10563.3	888286	487711
H2-D1	P01899	H-2 class I histocompatibility antigen, D-B alpha chain OS=Mus musculus OX=10090 GN=H2-D1 PE=1 SV=2	7.83614e+07	8.67516e+07	5.65591e+07	6.14583e+07	8.04253e+07	6.79413e+07	1.04265e+08	7.77697e+07	7.43771e+07	7.27201e+07	1.08916e+08	5.56282e+07	10563.3	10563.3	10563.3	10563.3	10563.3
H2-D1	P01900	H-2 class I histocompatibility antigen, D-D alpha chain OS=Mus musculus OX=10090 GN=H2-D1 PE=1 SV=1	10563.3	10563.3	380721	2.88226e+06	593538	2.90452e+06	3.37521e+06	10563.3	2.57005e+06	553534	10563.3	954602	1.51154e+06	663229	2.42408e+06	3.61478e+06	2.96743e+06
H2-D1	P14426	H-2 class I histocompatibility antigen, D-K alpha chain OS=Mus musculus OX=10090 GN=H2-D1 PE=1 SV=1	1.62212e+07	1.7473e+07	1.13054e+07	1.01402e+07	1.63511e+07	1.46385e+07	2.58619e+07	3.0485e+07	1.83448e+07	1.60219e+07	1.26754e+07	1.10199e+07	2.04874e+07	2.26834e+07	2.85064e+07	3.67212e+07	2.11373e+07
H2-K1	P01901	H-2 class I histocompatibility antigen, K-B alpha chain OS=Mus musculus OX=10090 GN=H2-K1 PE=1 SV=1	1.63564e+06	10563.3	187781	10563.3	609008	10563.3	274725	10563.3	10563.3	10563.3	258463	10563.3	10563.3	10563.3	10563.3	10563.3	10563.3
H2-K1	P01902	H-2 class I histocompatibility antigen, K-D alpha chain OS=Mus musculus OX=10090 GN=H2-K1 PE=1 SV=1	1.74115e+07	1.85699e+07	1.62309e+07	2.53926e+07	2.77062e+07	3.55614e+07	4.88127e+07	3.85301e+07	3.25581e+07	2.11933e+07	1.62656e+07	1.42421e+07	3.72127e+07	2.899e+07	3.71172e+07	6.2341e+07	3.20996e+07
H2-K1	P04223	H-2 class I histocompatibility antigen, K-K alpha chain OS=Mus musculus OX=10090 GN=H2-K1 PE=1 SV=1	2.24508e+07	2.88507e+07	2.03738e+07	1.7158e+07	2.45334e+07	2.82501e+07	4.70666e+07	3.83136e+07	2.4433e+07	2.35997e+07	2.02389e+07	1.54463e+07	10563.3	10563.3	10563.3	10563.3	10563.3
H2-L	P01897	H-2 class I histocompatibility antigen, L-D alpha chain OS=Mus musculus OX=10090 GN=H2-L PE=1 SV=2	10563.3	10563.3	10563.3	10563.3	10563.3	10563.3	10563.3	10563.3	10563.3	10563.3	10563.3	10563.3	1.24428e+08	7.34846e+07	8.05481e+07	1.21289e+08	8.79767e+07
H2-Q10	P01898	H-2 class I histocompatibility antigen, Q10 alpha chain OS=Mus musculus OX=10090 GN=H2-Q10 PE=1 SV=3	4.99253e+09	6.15194e+09	3.23584e+09	3.30387e+09	4.80625e+09	3.43135e+09	4.98043e+09	1.1745e+10	3.73603e+09	3.91004e+09	7.11383e+09	4.75974e+09	1.48873e+10	1.22522e+10	9.69798e+09	1.16969e+10	1.39409e+10
H2-Q8	P14430	H-2 class I histocompatibility antigen, Q8 alpha chain OS=Mus musculus OX=10090 GN=H2-Q8 PE=3 SV=1	2.89434e+07	3.61946e+07	2.34698e+07	2.38056e+07	4.07434e+07	3.24005e+07	5.84569e+07	1.53721e+07	2.75604e+07	3.03123e+07	2.13974e+07	1.73051e+07	4.11348e+07	2.77271e+07	2.2971e+07	2.73416e+07	3.21182e+07
H2ac20	Q64523	Histone H2A type 2-C OS=Mus musculus OX=10090 GN=H2ac20 PE=1 SV=3	2.30404e+06	9.17623e+06	2.33164e+06	1.39372e+07	1.13758e+06	2.51396e+06	5.00962e+06	4.24984e+06	3.3019e+06	1.07013e+07	5.71689e+06	4.00425e+06	3.21839e+06	7.30106e+06	1.17841e+07	8.36143e+06	6.39971e+06
H2bc3	Q64475	Histone H2B type 1-B OS=Mus musculus OX=10090 GN=H2bc3 PE=1 SV=3	549147	5.11069e+06	682838	4.53762e+06	2.22001e+06	2.23652e+06	3.02075e+06	1.35156e+06	2.76911e+06	1.9128e+06	869409	525541	9.32559e+07	3.9155e+08	3.71992e+08	9.0396e+07	1.5123e+08
H3-3a	P84244	Histone H3.3 OS=Mus musculus OX=10090 GN=H3-3a PE=1 SV=2	970173	2.96561e+06	1.17753e+06	3.84398e+06	887744	1.1212e+06	2.98737e+06	1.2059e+06	2.366e+06	2.95578e+06	1.41461e+06	1.23371e+06	1.79972e+06	3.85946e+06	5.11908e+06	3.55914e+06	3.92029e+06
H4c1	P62806	Histone H4 OS=Mus musculus OX=10090 GN=H4c1 PE=1 SV=2	6.67855e+06	1.7723e+07	3.5061e+06	1.89144e+07	3.45234e+06	7.00793e+06	1.24889e+07	6.43959e+06	1.21428e+07	1.5705e+07	8.54838e+06	5.97328e+06	5.04892e+06	1.29716e+07	1.62469e+07	1.14914e+07	9.60726e+06
H6pd	Q8CFX1	GDH/6PGL endoplasmic bifunctional protein OS=Mus musculus OX=10090 GN=H6pd PE=1 SV=2	1.08106e+07	1.12671e+07	8.60132e+06	1.02353e+07	1.36971e+07	6.92315e+06	1.38814e+07	1.86595e+07	3.591e+07	2.12691e+07	1.79904e+07	2.17835e+07	3.15427e+07	4.27227e+07	1.94454e+07	3.45371e+07	4.38765e+07
Habp2	Q8K0D2	Hyaluronan-binding protein 2 OS=Mus musculus OX=10090 GN=Habp2 PE=1 SV=2	5.74408e+07	7.66502e+07	8.00147e+07	7.09285e+07	1.06381e+08	7.11646e+07	4.41194e+07	3.17881e+07	3.18089e+07	9.91878e+07	5.58623e+07	5.33922e+07	4.47641e+07	1.07663e+08	2.39569e+07	6.15772e+07	5.51749e+07
Hacl1	Q9QXE0	2-hydroxyacyl-CoA lyase 1 OS=Mus musculus OX=10090 GN=Hacl1 PE=1 SV=2	223779	394463	353545	10563.3	611503	10563.3	10563.3	10563.3	10563.3	10563.3	282263	10563.3	5.8513e+06	8.96802e+06	531051	1.18026e+07	1.75926e+07
Hadh	Q61425	Hydroxyacyl-coenzyme A dehydrogenase, mitochondrial OS=Mus musculus OX=10090 GN=Hadh PE=1 SV=2	10563.3	10563.3	10563.3	10563.3	10563.3	10563.3	10563.3	10563.3	10563.3	10563.3	10563.3	10563.3	151024	10563.3	1.37418e+06	10563.3	10563.3
Hadha	Q8BMS1	Trifunctional enzyme subunit alpha, mitochondrial OS=Mus musculus OX=10090 GN=Hadha PE=1 SV=1	10563.3	10563.3	10563.3	10563.3	10563.3	10563.3	10563.3	10563.3	10563.3	10563.3	10563.3	10563.3	881053	10563.3	6.77277e+06	10563.3	10563.3
Hadhb	Q99JY0	Trifunctional enzyme subunit beta, mitochondrial OS=Mus musculus OX=10090 GN=Hadhb PE=1 SV=1	10563.3	10563.3	10563.3	10563.3	10563.3	10563.3	10563.3	10563.3	10563.3	10563.3	10563.3	10563.3	146123	10563.3	929689	10563.3	10563.3
Hal	P35492	Histidine ammonia-lyase OS=Mus musculus OX=10090 GN=Hal PE=1 SV=1	617766	805500	2.76953e+06	1.84708e+06	1.76235e+06	2.3461e+06	831769	3.20198e+06	1.52918e+06	1.23166e+07	4.22309e+06	1.93162e+06	4.6837e+06	7.9051e+06	4.6361e+06	5.87844e+06	3.05068e+06
Hamp	Q9EQ21	Hepcidin OS=Mus musculus OX=10090 GN=Hamp PE=2 SV=1	933330	1.10975e+06	10563.3	1.1455e+06	1.25277e+06	288468	10563.3	10563.3	10563.3	1.29892e+06	1.05994e+06	781381	10563.3	625465	1.0114e+06	703843	995691
Hba	P01942	Hemoglobin subunit alpha OS=Mus musculus OX=10090 GN=Hba PE=1 SV=2	3.25807e+08	5.79482e+08	7.47028e+08	1.05916e+08	8.84405e+08	6.08416e+07	2.96536e+08	9.07132e+07	1.744e+08	1.71267e+09	6.5737e+08	7.36093e+08	1.17313e+08	5.07935e+08	4.77022e+08	1.70297e+08	1.18508e+08
Hbb-b1	P02088	Hemoglobin subunit beta-1 OS=Mus musculus OX=10090 GN=Hbb-b1 PE=1 SV=2	4.02821e+08	9.01189e+08	1.45945e+09	2.00152e+08	1.60348e+09	1.42771e+08	4.48863e+08	1.0145e+08	3.06332e+08	2.57847e+09	1.0759e+09	1.29436e+09	1.29728e+08	6.26819e+08	4.63479e+08	1.85096e+08	1.19442e+08
Hbb-b2	P02089	Hemoglobin subunit beta-2 OS=Mus musculus OX=10090 GN=Hbb-b2 PE=1 SV=2	415227	10563.3	4.38892e+06	6.78854e+06	10563.3	10563.3	9.3868e+06	10563.3	10563.3	1.15555e+06	6.36146e+06	10563.3	10563.3	10563.3	10563.3	10563.3	10563.3
Heatr6	Q6P1G0	HEAT repeat-containing protein 6 OS=Mus musculus OX=10090 GN=Heatr6 PE=1 SV=1	1.43741e+06	1.85621e+07	3.51094e+07	1.66088e+07	1.06598e+06	2.11418e+07	3.15122e+07	10563.3	1.99476e+07	2.3566e+07	1.74307e+07	6.20776e+06	10563.3	10563.3	10563.3	10563.3	10563.3
Hebp1	Q9R257	Heme-binding protein 1 OS=Mus musculus OX=10090 GN=Hebp1 PE=1 SV=2	10563.3	10563.3	455090	338029	3.08909e+06	10563.3	385368	10563.3	442840	10563.3	2.5299e+06	2.53533e+06	10563.3	10563.3	10563.3	10563.3	10563.3
Heph	Q9Z0Z4	Hephaestin OS=Mus musculus OX=10090 GN=Heph PE=1 SV=3	4.03421e+06	4.64141e+06	7.49764e+07	1.1165e+08	3.60467e+07	1.04705e+08	9.23327e+07	1.45036e+06	4.57735e+07	4.13379e+07	6.41582e+07	1.0884e+08	2.06956e+06	1.65438e+06	779715	3.13385e+06	1.39404e+06
Hexa	P29416	Beta-hexosaminidase subunit alpha OS=Mus musculus OX=10090 GN=Hexa PE=1 SV=2	2.32278e+07	2.88865e+07	2.01196e+07	1.07689e+07	1.46662e+07	8.69544e+06	1.4447e+07	2.2449e+07	7.17265e+06	1.05327e+07	2.5645e+06	3.79803e+06	1.7331e+07	2.41958e+06	2.33622e+06	1.51617e+07	3.54862e+07
Hexb	P20060	Beta-hexosaminidase subunit beta OS=Mus musculus OX=10090 GN=Hexb PE=1 SV=2	297317	10563.3	10563.3	10563.3	343262	198298	282544	10563.3	10563.3	640393	10563.3	10563.3	188771	393836	233154	191986	376460
Hgd	O09173	Homogentisate 1,2-dioxygenase OS=Mus musculus OX=10090 GN=Hgd PE=1 SV=2	263700	303088	10563.3	144523	255256	572292	963021	1.44811e+07	1.22194e+06	1.19498e+07	1.87031e+07	2.81299e+06	4.00538e+07	4.6958e+07	1.82994e+06	4.04226e+07	4.75239e+07
Hgfac	Q9R098	Hepatocyte growth factor activator OS=Mus musculus OX=10090 GN=Hgfac PE=1 SV=1	3.69881e+06	2.37893e+06	2.25068e+06	3.50118e+06	3.17215e+06	2.03182e+06	4.69512e+06	3.53573e+06	1.25917e+06	312294	3.97393e+06	3.00339e+06	3.50352e+06	2.13895e+06	4.15687e+06	6.43399e+06	3.38014e+06
Hint1	P70349	Histidine triad nucleotide-binding protein 1 OS=Mus musculus OX=10090 GN=Hint1 PE=1 SV=3	2.98737e+06	4.07687e+06	1.48858e+06	3.6833e+06	6.02478e+06	1.12767e+06	3.13104e+06	2.45527e+06	2.95366e+06	3.87461e+06	6.32351e+06	1.14396e+06	2.4379e+06	755242	3.1526e+06	3.12131e+06	3.06938e+06
Hk1	P17710	Hexokinase-1 OS=Mus musculus OX=10090 GN=Hk1 PE=1 SV=3	10563.3	10563.3	10563.3	1.34688e+06	10563.3	10563.3	176891	164481	10563.3	255059	10563.3	10563.3	10563.3	10563.3	10563.3	10563.3	10563.3
Hmgb1	P63158	High mobility group protein B1 OS=Mus musculus OX=10090 GN=Hmgb1 PE=1 SV=2	10563.3	10563.3	10563.3	10563.3	10563.3	10563.3	10563.3	10563.3	10563.3	10563.3	10563.3	10563.3	10563.3	10563.3	10563.3	10563.3	10563.3
Hmgcs1	Q8JZK9	Hydroxymethylglutaryl-CoA synthase, cytoplasmic OS=Mus musculus OX=10090 GN=Hmgcs1 PE=1 SV=1	10563.3	10563.3	10563.3	10563.3	10563.3	10563.3	10563.3	10563.3	10563.3	583888	226703	10563.3	10563.3	10563.3	10563.3	10563.3	10563.3
Hmgcs2	P54869	Hydroxymethylglutaryl-CoA synthase, mitochondrial OS=Mus musculus OX=10090 GN=Hmgcs2 PE=1 SV=2	10563.3	10563.3	10563.3	10563.3	10563.3	10563.3	10563.3	10563.3	10563.3	10563.3	10563.3	10563.3	187996	1.11779e+06	2.16547e+06	1.48328e+06	2.6137e+06
Hnrnpa2b1	O88569	Heterogeneous nuclear ribonucleoproteins A2/B1 OS=Mus musculus OX=10090 GN=Hnrnpa2b1 PE=1 SV=2	10563.3	10563.3	960193	588670	10563.3	10563.3	10563.3	10563.3	1.41808e+06	7.38558e+06	10563.3	10563.3	10563.3	10563.3	10563.3	10563.3	10563.3
Hnrnpa3	Q8BG05	Heterogeneous nuclear ribonucleoprotein A3 OS=Mus musculus OX=10090 GN=Hnrnpa3 PE=1 SV=1	2.64503e+06	1.40386e+06	1.48253e+06	2.71921e+06	1.67548e+06	10563.3	472604	3.51787e+06	10563.3	2.14806e+06	2.72539e+06	1.74541e+06	512448	193229	785702	779788	678718
Hnrnpf	Q9Z2X1	Heterogeneous nuclear ribonucleoprotein F OS=Mus musculus OX=10090 GN=Hnrnpf PE=1 SV=3	10563.3	10563.3	10563.3	365429	10563.3	10563.3	793732	460661	10563.3	10563.3	10563.3	10563.3	10563.3	10563.3	10563.3	10563.3	10563.3
Hnrnpk	P61979	Heterogeneous nuclear ribonucleoprotein K OS=Mus musculus OX=10090 GN=Hnrnpk PE=1 SV=1	827817	2.28439e+06	939676	3.69126e+06	3.47962e+06	716597	1.6616e+06	10563.3	1.90497e+06	3.00731e+06	2.10587e+06	185567	529935	361579	1.11192e+06	1.77233e+06	2.93071e+06
Hook2	Q7TMK6	Protein Hook homolog 2 OS=Mus musculus OX=10090 GN=Hook2 PE=1 SV=3	10563.3	10563.3	10563.3	10563.3	10563.3	10563.3	10563.3	10563.3	10563.3	10563.3	10563.3	10563.3	1.30137e+06	687211	329930	763226	1.48895e+06
Hp	Q61646	Haptoglobin OS=Mus musculus OX=10090 GN=Hp PE=1 SV=1	1.76004e+08	7.38371e+07	7.58025e+07	1.84507e+08	7.26475e+07	1.37445e+08	1.21699e+09	1.87682e+08	3.88901e+08	3.32329e+07	1.5185e+07	8.20554e+06	2.78701e+08	5.25847e+07	2.90076e+09	3.44925e+08	1.76558e+08
Hpcal1	P62748	Hippocalcin-like protein 1 OS=Mus musculus OX=10090 GN=Hpcal1 PE=1 SV=2	924403	452716	1.38983e+06	1.86736e+06	540637	387588	1.39671e+06	542180	1.72788e+06	1.06175e+06	2.23661e+06	10563.3	1.31602e+06	797296	481615	884790	2.03148e+06
Hpn	O35453	Serine protease hepsin OS=Mus musculus OX=10090 GN=Hpn PE=1 SV=3	1.56266e+06	1.49534e+06	856167	562448	1.08132e+06	384850	10563.3	1.11554e+06	2.01186e+06	10563.3	378152	349210	10563.3	10563.3	1.0766e+06	1.01437e+06	770820
Hpse	Q6YGZ1	Heparanase OS=Mus musculus OX=10090 GN=Hpse PE=1 SV=3	8.37393e+06	1.31315e+07	8.94991e+06	5.44785e+06	6.90055e+06	3.20909e+06	6.8855e+06	1.12492e+07	4.83824e+06	7.73731e+06	2.37803e+06	3.34011e+06	8.319e+06	10563.3	1.19649e+06	8.4096e+06	1.972e+07
Hpse2	B2RY83	Inactive heparanase-2 OS=Mus musculus OX=10090 GN=Hpse2 PE=2 SV=1	10563.3	10563.3	470579	558918	276957	692272	353289	10563.3	430282	430158	551324	538725	1.07388e+06	1.19652e+06	1.337e+06	1.00187e+06	86429.6
Hpx	Q91X72	Hemopexin OS=Mus musculus OX=10090 GN=Hpx PE=1 SV=2	4.58343e+08	2.9929e+08	3.21888e+08	2.88387e+08	2.75645e+08	3.1318e+08	2.04927e+09	2.27633e+08	3.5264e+09	6.85543e+08	3.03623e+08	4.275e+08	1.91417e+08	2.05645e+08	1.43588e+09	1.95569e+08	1.37663e+08
Hrg	Q9ESB3	Histidine-rich glycoprotein OS=Mus musculus OX=10090 GN=Hrg PE=1 SV=2	5.96264e+09	6.92336e+09	5.71777e+09	1.91225e+09	4.40223e+09	3.15138e+09	2.05031e+09	2.17061e+09	6.66861e+08	5.43967e+09	3.15348e+09	2.82969e+09	1.91317e+09	2.38582e+09	1.6692e+09	1.05313e+09	1.48089e+09
Hsd17b4	P51660	Peroxisomal multifunctional enzyme type 2 OS=Mus musculus OX=10090 GN=Hsd17b4 PE=1 SV=3	10563.3	10563.3	10563.3	10563.3	10563.3	10563.3	10563.3	10563.3	10563.3	10563.3	10563.3	10563.3	1.596e+07	1.46512e+07	3.61055e+06	2.31868e+07	6.23627e+07
Hsd17b6	Q9R092	17-beta-hydroxysteroid dehydrogenase type 6 OS=Mus musculus OX=10090 GN=Hsd17b6 PE=1 SV=1	10563.3	10563.3	10563.3	10563.3	10563.3	10563.3	10563.3	10563.3	10563.3	10563.3	10563.3	10563.3	10563.3	10563.3	10563.3	10563.3	458928
Hsp90aa1	P07901	Heat shock protein HSP 90-alpha OS=Mus musculus OX=10090 GN=Hsp90aa1 PE=1 SV=4	6.55256e+07	1.08339e+08	9.25394e+07	1.02493e+08	8.69067e+07	8.99286e+07	6.53667e+07	1.08923e+08	8.62311e+07	8.36225e+07	9.12267e+07	2.93063e+07	9.86781e+07	1.17959e+08	7.00879e+07	1.12418e+08	2.3205e+08
Hsp90ab1	P11499	Heat shock protein HSP 90-beta OS=Mus musculus OX=10090 GN=Hsp90ab1 PE=1 SV=3	1.57733e+07	1.98752e+07	1.5889e+07	1.81012e+07	1.43953e+07	1.42516e+07	9.14845e+06	1.61067e+07	9.96882e+06	1.50251e+07	1.63432e+07	3.79324e+06	4.32914e+07	3.34356e+07	2.83274e+07	4.83602e+07	7.34392e+07
Hsp90b1	P08113	Endoplasmin OS=Mus musculus OX=10090 GN=Hsp90b1 PE=1 SV=2	5.29804e+07	1.04699e+08	8.69573e+07	8.5446e+07	6.69939e+07	8.03626e+07	5.95438e+07	7.3453e+07	8.99308e+07	8.13143e+07	7.50331e+07	4.13595e+07	6.46918e+07	7.8716e+07	5.05056e+07	6.87482e+07	1.03057e+08
Hspa1a	Q61696	Heat shock 70 kDa protein 1A OS=Mus musculus OX=10090 GN=Hspa1a PE=1 SV=2	10563.3	186038	10563.3	272242	311127	356906	10563.3	10563.3	10563.3	10563.3	10563.3	10563.3	10563.3	10563.3	10563.3	10563.3	10563.3
Hspa4	Q61316	Heat shock 70 kDa protein 4 OS=Mus musculus OX=10090 GN=Hspa4 PE=1 SV=1	6.47249e+07	4.3313e+07	3.63454e+07	2.6194e+07	3.29956e+07	3.08327e+07	1.32384e+07	1.19794e+07	1.66886e+07	1.43311e+07	3.54179e+07	1.94518e+07	2.283e+07	9.2826e+06	4.82669e+06	1.91522e+07	4.25979e+07
Hspa5	P20029	Endoplasmic reticulum chaperone BiP OS=Mus musculus OX=10090 GN=Hspa5 PE=1 SV=3	1.77228e+08	2.38567e+08	2.49236e+08	2.47544e+08	2.05634e+08	2.19359e+08	2.92028e+08	4.21476e+08	5.01857e+08	3.04269e+08	4.07669e+08	2.89945e+08	7.51458e+08	1.41241e+09	4.24098e+08	1.09815e+09	1.32373e+09
Hspa8	P63017	Heat shock cognate 71 kDa protein OS=Mus musculus OX=10090 GN=Hspa8 PE=1 SV=1	5.56142e+07	6.7775e+07	3.85296e+07	9.13008e+07	6.81249e+07	4.51064e+07	6.72825e+07	3.35755e+07	9.34404e+07	8.83577e+07	6.37546e+07	1.89259e+07	2.58597e+07	2.1763e+07	1.28694e+07	2.29379e+07	4.05804e+07
Hspb1	P14602	Heat shock protein beta-1 OS=Mus musculus OX=10090 GN=Hspb1 PE=1 SV=3	963289	2.29263e+06	1.36863e+06	1.66873e+06	2.24894e+06	1.78813e+06	2.06277e+06	1.54278e+06	195393	2.15309e+06	2.20967e+06	290753	1.95568e+06	1.14887e+06	1.90522e+06	3.27114e+06	3.14443e+06
Hspb6	Q5EBG6	Heat shock protein beta-6 OS=Mus musculus OX=10090 GN=Hspb6 PE=1 SV=1	1.00485e+06	2.10299e+06	3.33654e+06	3.11039e+06	1.02658e+06	2.82381e+06	2.79084e+06	536469	3.46611e+06	4.14097e+06	4.90349e+06	5.37946e+06	10563.3	10563.3	10563.3	10563.3	10563.3
Hspd1	P63038	60 kDa heat shock protein, mitochondrial OS=Mus musculus OX=10090 GN=Hspd1 PE=1 SV=1	2.21905e+08	3.83898e+08	3.45602e+08	2.04914e+08	1.3369e+08	2.07731e+08	1.97926e+08	4.20756e+07	9.86269e+07	1.7933e+08	2.12373e+08	2.20339e+08	8.26655e+07	1.06662e+08	1.07363e+08	1.02358e+08	8.21711e+07
Hspe1	Q64433	10 kDa heat shock protein, mitochondrial OS=Mus musculus OX=10090 GN=Hspe1 PE=1 SV=2	10563.3	10563.3	10563.3	844678	10563.3	10563.3	10563.3	10563.3	308499	691738	10563.3	10563.3	10563.3	227742	283276	191994	141993
Hspg2	Q05793	Basement membrane-specific heparan sulfate proteoglycan core protein OS=Mus musculus OX=10090 GN=Hspg2 PE=1 SV=1	4.28633e+07	7.22539e+07	8.03207e+07	5.75403e+07	3.65646e+07	7.27405e+07	8.96947e+07	8.36228e+06	5.41037e+07	8.07883e+07	5.8857e+07	4.61806e+07	1.36359e+07	2.16445e+07	1.24437e+07	1.53953e+07	2.03057e+07
Hsph1	Q61699	Heat shock protein 105 kDa OS=Mus musculus OX=10090 GN=Hsph1 PE=1 SV=2	10563.3	10563.3	10563.3	10563.3	10563.3	10563.3	10563.3	10563.3	10563.3	10563.3	10563.3	10563.3	439934	508858	10563.3	852857	780696
Htatip2	Q9Z2G9	Oxidoreductase HTATIP2 OS=Mus musculus OX=10090 GN=Htatip2 PE=1 SV=3	10563.3	625286	444754	10563.3	10563.3	10563.3	828209	10563.3	776133	524458	767145	506059	1.4187e+06	1.78399e+06	346671	1.65167e+06	1.23568e+06
Htra1	Q9R118	Serine protease HTRA1 OS=Mus musculus OX=10090 GN=Htra1 PE=1 SV=2	4.72329e+06	7.94535e+06	3.76171e+06	7.50801e+06	5.49736e+06	5.12305e+06	2.94068e+06	2.22251e+06	5.97277e+06	5.29999e+07	4.45667e+06	4.83621e+06	1.59615e+06	573883	1.53453e+06	1.79569e+06	1.65088e+06
Htra2	Q9JIY5	Serine protease HTRA2, mitochondrial OS=Mus musculus OX=10090 GN=Htra2 PE=1 SV=2	10563.3	10563.3	10563.3	10563.3	10563.3	10563.3	10563.3	592342	10563.3	10563.3	10563.3	10563.3	345977	1.25933e+06	10563.3	10563.3	350069
Hyal1	Q91ZJ9	Hyaluronidase-1 OS=Mus musculus OX=10090 GN=Hyal1 PE=1 SV=3	1.58121e+06	939343	1.31303e+06	4.02816e+06	1.2254e+06	4.02933e+06	359039	873395	10563.3	1.23592e+06	1.34281e+06	1.07397e+06	758560	582752	605113	1.09558e+06	646008
Hyou1	Q9JKR6	Hypoxia up-regulated protein 1 OS=Mus musculus OX=10090 GN=Hyou1 PE=1 SV=1	1.80614e+07	3.60528e+07	4.29859e+07	2.65563e+07	1.72054e+07	2.91563e+07	4.16862e+07	5.35107e+07	2.91559e+07	2.83287e+07	2.42438e+07	1.7891e+07	6.54883e+06	8.85629e+06	1.10647e+06	3.74735e+06	1.17006e+07
Ica	Q9DBD0	Inhibitor of carbonic anhydrase OS=Mus musculus OX=10090 GN=Ica PE=1 SV=1	7.74519e+08	5.9371e+08	6.52767e+08	6.56985e+08	4.70402e+08	6.34818e+08	3.43192e+08	3.56173e+08	5.97234e+08	3.95852e+08	6.49584e+08	6.16361e+08	3.33308e+08	4.54063e+08	3.69028e+08	4.22033e+08	2.35702e+08
Icam1	P13597	Intercellular adhesion molecule 1 OS=Mus musculus OX=10090 GN=Icam1 PE=1 SV=1	3.58626e+06	2.02165e+06	2.36101e+06	2.59818e+06	2.21879e+06	1.68251e+06	968054	585932	3.6207e+06	3.00674e+06	1.18779e+06	1.08335e+06	280626	656622	556529	10563.3	10563.3
Ide	Q9JHR7	Insulin-degrading enzyme OS=Mus musculus OX=10090 GN=Ide PE=1 SV=1	4.58972e+06	3.12411e+06	2.08415e+06	2.33132e+06	2.72648e+06	1.65509e+06	10563.3	338596	10563.3	10563.3	582182	905472	207148	211335	10563.3	1.12125e+06	2.58277e+06
Idh1	O88844	Isocitrate dehydrogenase [NADP] cytoplasmic OS=Mus musculus OX=10090 GN=Idh1 PE=1 SV=2	10563.3	10563.3	10563.3	10563.3	10563.3	10563.3	10563.3	10563.3	10563.3	10563.3	10563.3	10563.3	10563.3	124386	297058	171731	347042
Idh2	P54071	Isocitrate dehydrogenase [NADP], mitochondrial OS=Mus musculus OX=10090 GN=Idh2 PE=1 SV=3	10563.3	332530	182855	10563.3	10563.3	10563.3	10563.3	10563.3	10563.3	240408	10563.3	10563.3	10563.3	10563.3	10563.3	10563.3	10563.3
Idh3a	Q9D6R2	Isocitrate dehydrogenase [NAD] subunit alpha, mitochondrial OS=Mus musculus OX=10090 GN=Idh3a PE=1 SV=1	10563.3	10563.3	10563.3	2.11414e+06	10563.3	10563.3	10563.3	10563.3	10563.3	367288	133711	10563.3	10563.3	10563.3	10563.3	10563.3	10563.3
Ifi27l2b	Q8VC49	Interferon alpha-inducible protein 27-like protein 2B OS=Mus musculus OX=10090 GN=Ifi27l2b PE=1 SV=1	10563.3	835771	298967	368107	407816	1.73501e+06	10563.3	10563.3	243086	456947	1.61254e+06	350561	475477	541640	10563.3	576116	351517
Ifi30	Q9ESY9	Gamma-interferon-inducible lysosomal thiol reductase OS=Mus musculus OX=10090 GN=Ifi30 PE=1 SV=3	1.90143e+06	1.33909e+06	1.20887e+06	3.31337e+06	1.25934e+06	2.38444e+06	1.23204e+06	4.80653e+06	3.25277e+06	1.38101e+06	2.63202e+06	2.15112e+06	10563.3	10563.3	10563.3	10563.3	10563.3
Ifnar2	O35664	Interferon alpha/beta receptor 2 OS=Mus musculus OX=10090 GN=Ifnar2 PE=1 SV=2	1.24663e+07	1.18059e+07	1.00342e+07	1.03001e+07	8.47532e+06	9.95636e+06	3.37754e+06	4.20558e+06	3.18953e+06	5.44621e+06	5.41128e+06	3.32903e+06	6.85768e+06	1.0542e+07	7.31992e+06	9.96707e+06	8.62958e+06
Igf1	P05017	Insulin-like growth factor I OS=Mus musculus OX=10090 GN=Igf1 PE=1 SV=2	1.14304e+07	1.27923e+07	1.54392e+07	1.70313e+07	1.44269e+07	1.33652e+07	7.97999e+06	3.2905e+06	1.39547e+07	6.90105e+06	1.0178e+07	8.05599e+06	10563.3	10563.3	10563.3	10563.3	10563.3
Igf2r	Q07113	Cation-independent mannose-6-phosphate receptor OS=Mus musculus OX=10090 GN=Igf2r PE=1 SV=1	1.7534e+07	2.05631e+07	2.59008e+07	1.54441e+07	1.88262e+07	1.93876e+07	9.33365e+06	8.26667e+06	7.11664e+06	7.63692e+06	1.85499e+07	9.54454e+06	6.0676e+06	2.26824e+06	843693	6.42486e+06	1.02683e+07
Igfals	P70389	Insulin-like growth factor-binding protein complex acid labile subunit OS=Mus musculus OX=10090 GN=Igfals PE=1 SV=1	5.13287e+08	6.04414e+08	4.29383e+08	5.61231e+08	5.3105e+08	4.19552e+08	1.4952e+08	1.81228e+08	1.02635e+08	2.40019e+08	2.54178e+08	2.49013e+08	2.12394e+08	2.57567e+08	2.04542e+08	2.4223e+08	2.49882e+08
Igfbp1	P47876	Insulin-like growth factor-binding protein 1 OS=Mus musculus OX=10090 GN=Igfbp1 PE=2 SV=2	183673	2.31779e+06	415407	292902	10563.3	1.469e+06	1.55695e+06	1.47203e+06	6.14354e+06	4.34949e+06	1.5368e+06	1.23699e+06	10563.3	10563.3	10563.3	10563.3	10563.3
Igfbp2	P47877	Insulin-like growth factor-binding protein 2 OS=Mus musculus OX=10090 GN=Igfbp2 PE=2 SV=2	2.93797e+07	1.86335e+07	2.82059e+07	2.09226e+07	2.23406e+07	2.76417e+07	1.37495e+07	10563.3	1.01406e+07	10563.3	4.05649e+06	1.45575e+06	705524	1.37487e+06	3.85718e+06	10563.3	10563.3
Igfbp3	P47878	Insulin-like growth factor-binding protein 3 OS=Mus musculus OX=10090 GN=Igfbp3 PE=2 SV=2	1.90615e+08	3.11221e+08	2.81578e+08	3.36623e+08	2.81197e+08	2.75905e+08	1.84915e+08	4.6788e+07	2.38328e+08	2.23955e+08	3.20367e+08	1.04336e+08	1.7345e+07	2.39469e+07	1.98121e+07	1.76376e+07	1.73897e+07
Igfbp4	P47879	Insulin-like growth factor-binding protein 4 OS=Mus musculus OX=10090 GN=Igfbp4 PE=1 SV=2	2.68091e+06	2.40533e+06	7.02831e+06	6.80351e+06	4.43689e+06	6.44241e+06	1.1148e+07	287476	1.37206e+07	3.10531e+06	1.26293e+07	5.21146e+06	2.81408e+06	1.20677e+06	4.99113e+06	2.8884e+06	771518
Igfbp5	Q07079	Insulin-like growth factor-binding protein 5 OS=Mus musculus OX=10090 GN=Igfbp5 PE=1 SV=1	3.08122e+07	1.50863e+07	2.89503e+07	4.95807e+07	7.99869e+07	3.23923e+07	7.20336e+07	1.51976e+07	9.78378e+07	3.44575e+07	2.99452e+07	2.86264e+07	1.27163e+07	1.51452e+07	2.25038e+07	1.26566e+07	1.17701e+07
Igfbp6	P47880	Insulin-like growth factor-binding protein 6 OS=Mus musculus OX=10090 GN=Igfbp6 PE=2 SV=2	1.19463e+06	1.90065e+06	2.88617e+06	2.8504e+06	2.28354e+06	2.55073e+06	2.46399e+06	10563.3	1.81086e+06	205456	2.3209e+06	767889	1.21053e+06	10563.3	841253	1.05019e+06	539395
Igfbp7	Q61581	Insulin-like growth factor-binding protein 7 OS=Mus musculus OX=10090 GN=Igfbp7 PE=1 SV=3	401585	422534	493870	429806	378136	587399	198098	10563.3	510496	346428	821640	330449	1.20142e+06	1.0744e+06	472369	910291	220347
Igh-3	P01867	Ig gamma-2B chain C region OS=Mus musculus OX=10090 GN=Igh-3 PE=1 SV=3	2.0515e+09	1.32141e+09	3.97809e+08	5.44947e+08	1.37317e+09	4.23796e+08	4.75368e+09	7.85721e+08	4.65854e+09	2.03458e+09	8.26888e+08	3.17156e+09	1.52091e+09	6.84069e+08	3.06314e+09	8.60869e+08	2.43548e+08
Igh-VJ558	P01758	Ig heavy chain V region 108A OS=Mus musculus OX=10090 GN=Igh-VJ558 PE=4 SV=1	1.49471e+07	1.16774e+07	8.35042e+06	1.13871e+07	1.65214e+07	6.42703e+06	1.15463e+07	1.33007e+07	3.27493e+07	3.33205e+07	7.22675e+06	1.5813e+07	5.34652e+06	5.80779e+06	1.72779e+07	5.64357e+06	4.87159e+06
Ighg1	P01869	Ig gamma-1 chain C region, membrane-bound form OS=Mus musculus OX=10090 GN=Ighg1 PE=1 SV=2	3.37064e+08	4.73911e+08	2.21663e+08	3.3247e+08	3.76615e+08	8.59786e+07	1.54287e+09	4.72673e+08	2.75356e+09	5.44337e+08	1.38983e+08	5.42355e+08	2.51116e+08	1.71831e+08	1.88753e+09	1.55849e+08	6.0675e+07
Ighm	P01872	Immunoglobulin heavy constant mu OS=Mus musculus OX=10090 GN=Ighm PE=1 SV=2	1.30195e+10	1.63192e+10	8.61783e+09	4.74426e+09	9.7638e+09	8.00833e+09	1.2336e+10	6.41363e+09	2.04008e+10	1.07895e+10	6.85857e+09	1.2551e+10	1.04689e+10	9.31796e+09	2.08193e+10	8.94519e+09	8.46587e+09
Ighv1-61	P01749	Ig heavy chain V region 3 OS=Mus musculus OX=10090 GN=Ighv1-61 PE=1 SV=1	2.54963e+07	2.29826e+07	1.57999e+07	2.84862e+07	4.42215e+07	3.2221e+07	1.2051e+07	1.95806e+07	2.06325e+07	2.32109e+07	2.36963e+07	2.7867e+07	2.74546e+07	6.10083e+07	6.47489e+07	2.40216e+07	1.5208e+07
Ighv1-72	P06328	Ig heavy chain V region 1-72 OS=Mus musculus OX=10090 GN=Ighv1-72 PE=1 SV=2	7.17538e+07	2.67242e+07	1.03875e+07	9.36368e+06	4.83473e+07	2.00352e+07	8.50098e+07	3.78697e+07	9.69397e+07	5.04114e+07	2.50793e+07	3.51577e+07	1.75653e+07	8.15549e+06	4.92574e+07	4.81157e+06	4.18396e+06
Ighv3-6	P18531	Ig heavy chain V region 3-6 OS=Mus musculus OX=10090 GN=Ighv3-6 PE=1 SV=1	1.13118e+07	2.43136e+07	8.36389e+06	7.31267e+06	1.05294e+07	8.78244e+06	1.28735e+07	1.04665e+06	2.91566e+07	3.62332e+07	5.6333e+06	1.42921e+07	6.94181e+07	2.2519e+08	2.57853e+08	5.20606e+07	1.46922e+08
Igk-V19-17	P01633	Ig kappa chain V19-17 OS=Mus musculus OX=10090 GN=Igk-V19-17 PE=1 SV=1	3.99953e+08	5.45481e+08	3.01862e+08	2.86888e+08	5.74494e+08	2.83689e+08	5.79898e+08	1.01473e+09	1.05655e+09	1.51301e+09	2.5306e+08	4.76168e+08	4.42524e+08	2.42549e+09	1.22235e+09	4.00635e+08	1.2172e+09
Igkc	P01837	Immunoglobulin kappa constant OS=Mus musculus OX=10090 GN=Igkc PE=1 SV=2	4.93039e+09	4.55921e+09	3.79955e+09	3.28343e+09	4.40949e+09	3.8953e+09	6.08402e+09	4.97735e+09	8.35464e+09	1.0119e+10	3.19237e+09	4.8707e+09	4.22838e+09	1.01087e+10	7.1719e+09	2.96544e+09	4.27167e+09
Igkv7-33	P01632	Ig kappa chain V-I region S107A OS=Mus musculus OX=10090 GN=Igkv7-33 PE=2 SV=1	2.77198e+07	2.38788e+07	1.60397e+07	1.68373e+07	5.44315e+07	1.26142e+07	1.10217e+08	6.49493e+07	1.93889e+08	1.02728e+08	1.8716e+07	4.0556e+07	2.83858e+06	2.95167e+06	5.24866e+06	1.98341e+06	996317
Iglc2	P01844	Ig lambda-2 chain C region OS=Mus musculus OX=10090 GN=Iglc2 PE=1 SV=1	9.53978e+07	1.53447e+08	1.2931e+08	4.84318e+07	9.03618e+07	9.09844e+07	1.10107e+08	7.71384e+07	2.63402e+08	2.66473e+08	4.4083e+07	1.38483e+08	1.48708e+07	3.4244e+07	6.76018e+07	5.82602e+07	5.07207e+07
Iglc3	P01845	Ig lambda-3 chain C region OS=Mus musculus OX=10090 GN=Iglc3 PE=1 SV=1	6.41984e+06	1.33544e+07	1.1821e+07	6.10948e+06	1.0234e+07	8.45226e+06	6.22059e+06	1.93389e+07	3.46498e+07	1.70536e+07	4.84961e+06	1.6415e+07	4.87086e+06	4.5251e+06	2.04047e+07	6.16101e+06	4.93448e+06
Ihh	P97812	Indian hedgehog protein OS=Mus musculus OX=10090 GN=Ihh PE=1 SV=2	1.75609e+06	3.56465e+06	6.80784e+06	3.74225e+06	2.63988e+06	1.02509e+07	5.10375e+06	1.12952e+07	4.35549e+06	1.61639e+07	7.92769e+06	1.19819e+07	1.172e+07	1.00462e+07	5.50024e+06	7.88859e+06	6.90252e+06
Il18bp	Q9Z0M9	Interleukin-18-binding protein OS=Mus musculus OX=10090 GN=Il18bp PE=1 SV=2	614842	662205	601991	911273	819144	862920	1.14054e+06	674495	829727	636018	358602	10563.3	540471	377109	588775	649513	285503
Il1rap	Q61730	Interleukin-1 receptor accessory protein OS=Mus musculus OX=10090 GN=Il1rap PE=1 SV=1	1.77243e+07	1.28844e+07	1.81352e+07	1.6683e+07	1.79897e+07	2.19426e+07	3.84977e+07	8.97783e+06	3.08212e+07	1.45022e+07	1.87148e+07	1.98338e+07	6.5498e+06	1.83357e+07	2.79847e+07	9.77142e+06	6.23522e+06
Il2rg	P34902	Cytokine receptor common subunit gamma OS=Mus musculus OX=10090 GN=Il2rg PE=1 SV=1	1.36475e+06	1.96538e+06	3.2315e+06	393237	3.5332e+06	278183	885288	10563.3	650357	4.30633e+06	2.04348e+06	3.00865e+06	10563.3	10563.3	10563.3	10563.3	10563.3
Ilk	O55222	Integrin-linked protein kinase OS=Mus musculus OX=10090 GN=Ilk PE=1 SV=2	1.67796e+07	4.74835e+07	4.36227e+07	5.06627e+07	2.41532e+07	1.82815e+07	3.69689e+07	1.22589e+07	3.19079e+07	1.66054e+07	5.24429e+07	4.5971e+06	2.4508e+07	1.22286e+07	1.06377e+07	2.84371e+07	5.81692e+07
Impdh2	P24547	Inosine-5'-monophosphate dehydrogenase 2 OS=Mus musculus OX=10090 GN=Impdh2 PE=1 SV=2	362690	586243	585507	10563.3	760588	10563.3	10563.3	10563.3	10563.3	243507	435773	10563.3	276399	10563.3	10563.3	381326	428609
Ina	P46660	Alpha-internexin OS=Mus musculus OX=10090 GN=Ina PE=1 SV=3	10563.3	10563.3	10563.3	885402	10563.3	10563.3	10563.3	10563.3	10563.3	10563.3	10563.3	10563.3	10563.3	10563.3	10563.3	10563.3	10563.3
Inf2	Q0GNC1	Inverted formin-2 OS=Mus musculus OX=10090 GN=Inf2 PE=1 SV=1	598373	2.11991e+06	4.08028e+06	1.90379e+06	173316	2.18667e+06	4.62252e+06	10563.3	971891	1.91695e+06	2.30632e+06	10563.3	10563.3	10563.3	10563.3	10563.3	10563.3
Inhbc	P55104	Inhibin beta C chain OS=Mus musculus OX=10090 GN=Inhbc PE=2 SV=2	4.76378e+06	6.47129e+06	5.71647e+06	6.9307e+06	6.56496e+06	5.79315e+06	769904	1.68851e+06	2.03678e+06	388108	2.29737e+06	648318	831509	424007	429097	638088	10563.3
Inhbe	O08717	Inhibin beta E chain OS=Mus musculus OX=10090 GN=Inhbe PE=2 SV=2	10563.3	1.43155e+06	153111	1.17619e+06	522102	810699	4.80367e+06	1.47401e+06	1.31719e+06	10563.3	1.90286e+06	850187	284367	788823	161861	1.36236e+06	2.25762e+06
Insl3	O09107	Insulin-like 3 OS=Mus musculus OX=10090 GN=Insl3 PE=1 SV=2	447297	454114	1.0184e+06	549865	984296	386663	10563.3	10563.3	10563.3	10563.3	462860	10563.3	10563.3	10563.3	10563.3	10563.3	10563.3
Insrr	Q9WTL4	Insulin receptor-related protein OS=Mus musculus OX=10090 GN=Insrr PE=1 SV=2	10563.3	10563.3	518806	481723	493891	582443	2.75978e+06	10563.3	1.79594e+06	10563.3	1.37017e+06	698169	10563.3	10563.3	10563.3	10563.3	10563.3
Ipo5	Q8BKC5	Importin-5 OS=Mus musculus OX=10090 GN=Ipo5 PE=1 SV=3	1.31143e+06	4.8605e+06	1.08606e+07	8.85819e+06	2.21783e+06	8.65943e+06	2.23319e+07	207989	1.23288e+07	1.60033e+07	9.46734e+06	5.73588e+06	10563.3	10563.3	10563.3	10563.3	10563.3
Islr	Q6GU68	Immunoglobulin superfamily containing leucine-rich repeat protein OS=Mus musculus OX=10090 GN=Islr PE=1 SV=1	1.63676e+06	2.03025e+06	1.53914e+06	2.53272e+06	1.50437e+06	2.06782e+06	475171	363120	583717	232857	1.3152e+06	345550	1.10583e+06	868388	1.25143e+06	953917	1.43477e+06
Isoc2a	P85094	Isochorismatase domain-containing protein 2A OS=Mus musculus OX=10090 GN=Isoc2a PE=1 SV=1	10563.3	10563.3	10563.3	10563.3	10563.3	10563.3	10563.3	10563.3	10563.3	10563.3	10563.3	10563.3	10563.3	10563.3	1.59471e+06	10563.3	266661
Ist1	Q9CX00	IST1 homolog OS=Mus musculus OX=10090 GN=Ist1 PE=1 SV=1	10563.3	235902	305879	235133	971736	298630	736524	711808	1.10317e+06	10563.3	318921	196563	10563.3	10563.3	10563.3	10563.3	10563.3
Isyna1	Q9JHU9	Inositol-3-phosphate synthase 1 OS=Mus musculus OX=10090 GN=Isyna1 PE=1 SV=1	673723	718687	10563.3	465002	10563.3	10563.3	10563.3	10563.3	10563.3	10563.3	10563.3	10563.3	532555	424138	603228	1.1279e+06	1.35652e+06
Itga2	Q62469	Integrin alpha-2 OS=Mus musculus OX=10090 GN=Itga2 PE=1 SV=2	7.55387e+06	8.27607e+06	6.28384e+06	8.85756e+06	8.52223e+06	6.24827e+06	3.07943e+06	2.94334e+06	2.50303e+06	7.45314e+06	4.97441e+06	4.37837e+06	2.09733e+06	2.36746e+06	10563.3	2.50935e+06	1.12896e+06
Itga2b	Q9QUM0	Integrin alpha-IIb OS=Mus musculus OX=10090 GN=Itga2b PE=1 SV=2	7.59673e+06	1.09614e+07	1.08653e+07	9.78756e+06	9.13137e+06	6.69605e+06	7.54722e+06	5.68229e+06	6.93142e+06	4.97792e+06	1.16363e+07	6.83048e+06	6.53707e+06	6.08659e+06	5.2191e+06	5.74452e+06	1.09914e+07
Itgam	P05555	Integrin alpha-M OS=Mus musculus OX=10090 GN=Itgam PE=1 SV=2	6.52901e+06	4.3526e+06	4.20376e+06	7.52476e+06	4.62818e+06	3.97197e+06	6.04514e+06	7.34228e+06	1.43697e+07	3.30688e+07	1.97874e+07	2.61636e+07	1.74353e+06	9.15667e+06	2.32871e+06	1.10143e+06	1.65818e+06
Itgb1	P09055	Integrin beta-1 OS=Mus musculus OX=10090 GN=Itgb1 PE=1 SV=1	8.51699e+06	1.11791e+07	5.21237e+06	7.52789e+06	7.76744e+06	7.544e+06	1.89394e+06	4.9238e+06	3.28323e+06	9.46828e+06	6.68126e+06	4.67379e+06	2.78514e+06	3.23312e+06	2.18659e+06	2.78084e+06	2.67984e+06
Itgb2	P11835	Integrin beta-2 OS=Mus musculus OX=10090 GN=Itgb2 PE=1 SV=2	4.74274e+06	8.32303e+06	3.61377e+06	9.49956e+06	6.75994e+06	5.84049e+06	7.20782e+06	1.05104e+07	1.16434e+07	2.67362e+07	2.55547e+07	2.81352e+07	4.99841e+06	1.56341e+07	5.51028e+06	5.0364e+06	4.1873e+06
Itgb3	O54890	Integrin beta-3 OS=Mus musculus OX=10090 GN=Itgb3 PE=1 SV=2	1.20338e+07	1.01883e+07	6.17946e+06	7.29087e+06	1.1131e+07	6.91004e+06	1.26289e+07	3.24925e+06	1.77763e+07	6.25051e+06	8.96778e+06	1.4084e+07	1.24049e+07	1.10208e+07	1.09009e+07	1.23418e+07	1.21018e+07
Itih1	Q61702	Inter-alpha-trypsin inhibitor heavy chain H1 OS=Mus musculus OX=10090 GN=Itih1 PE=1 SV=2	1.21669e+09	1.33497e+09	1.48387e+09	1.00791e+09	1.38404e+09	1.25127e+09	2.60287e+09	2.53185e+09	2.40351e+09	1.24144e+09	1.47589e+09	1.40897e+09	2.68766e+09	2.60486e+09	4.14759e+09	1.87653e+09	1.46414e+09
Itih2	Q61703	Inter-alpha-trypsin inhibitor heavy chain H2 OS=Mus musculus OX=10090 GN=Itih2 PE=1 SV=1	7.35531e+08	6.84543e+08	8.57644e+08	8.83499e+08	8.75955e+08	8.23403e+08	1.3687e+09	1.71053e+09	1.06067e+09	2.34451e+09	1.09682e+09	1.02507e+09	2.32123e+09	3.02136e+09	3.53216e+09	2.16995e+09	2.10407e+09
Itih3	Q61704	Inter-alpha-trypsin inhibitor heavy chain H3 OS=Mus musculus OX=10090 GN=Itih3 PE=1 SV=3	6.37267e+08	3.80908e+08	4.17034e+08	6.8989e+08	8.36056e+08	5.95292e+08	1.49657e+09	7.40955e+08	1.74693e+09	4.52669e+08	3.46282e+08	5.23264e+08	4.50214e+08	3.20903e+08	1.12668e+09	2.6682e+08	1.62135e+08
Itih4	A6X935	Inter alpha-trypsin inhibitor, heavy chain 4 OS=Mus musculus OX=10090 GN=Itih4 PE=1 SV=2	8.20417e+09	6.11091e+09	6.66597e+09	1.20504e+10	1.1122e+10	1.03052e+10	8.27685e+09	1.13136e+10	1.17135e+10	1.10385e+10	7.1487e+09	1.12376e+10	1.06081e+10	9.04117e+09	7.4214e+09	1.24843e+10	6.74577e+09
Itm2b	O89051	Integral membrane protein 2B OS=Mus musculus OX=10090 GN=Itm2b PE=1 SV=1	1.07751e+07	1.39576e+07	1.54326e+07	1.30991e+07	1.18418e+07	1.65816e+07	1.11848e+07	1.00549e+07	2.31843e+07	1.13688e+07	1.03692e+07	4.52797e+06	1.30209e+07	1.84328e+07	3.23667e+07	1.21105e+07	1.52291e+07
Ivd	Q9JHI5	Isovaleryl-CoA dehydrogenase, mitochondrial OS=Mus musculus OX=10090 GN=Ivd PE=1 SV=1	3.77678e+06	1.59482e+07	1.77939e+07	5.68429e+06	417357	4.44051e+06	2.76212e+07	761362	7.6627e+06	2.2287e+07	3.29537e+06	2.93573e+06	10563.3	10563.3	10563.3	10563.3	10563.3
Jchain	P01592	Immunoglobulin J chain OS=Mus musculus OX=10090 GN=Jchain PE=1 SV=4	9.35917e+08	1.03359e+09	9.8962e+08	7.88274e+08	1.45168e+09	1.1731e+09	6.23306e+08	4.68962e+08	1.48669e+09	3.9314e+09	7.77008e+08	9.19035e+08	3.67057e+08	2.6221e+09	7.01694e+08	3.42924e+08	1.34578e+09
Jup	Q02257	Junction plakoglobin OS=Mus musculus OX=10090 GN=Jup PE=1 SV=3	10563.3	10563.3	271139	347329	166101	10563.3	342554	10563.3	261113	10563.3	327292	226700	10563.3	10563.3	10563.3	10563.3	10563.3
Katnal2	Q9D3R6	Katanin p60 ATPase-containing subunit A-like 2 OS=Mus musculus OX=10090 GN=Katnal2 PE=2 SV=2	10563.3	10563.3	10563.3	10563.3	10563.3	10563.3	10563.3	10563.3	10563.3	10563.3	10563.3	10563.3	2.15507e+06	1.9504e+06	1.80335e+06	3.07376e+06	5.08063e+06
Kctd12	Q6WVG3	BTB/POZ domain-containing protein KCTD12 OS=Mus musculus OX=10090 GN=Kctd12 PE=1 SV=1	7.82969e+06	5.29174e+06	4.20036e+06	5.02992e+06	5.45873e+06	6.50625e+06	10563.3	10563.3	412838	687816	322548	10563.3	10563.3	10563.3	10563.3	10563.3	10563.3
Khsrp	Q3U0V1	Far upstream element-binding protein 2 OS=Mus musculus OX=10090 GN=Khsrp PE=1 SV=2	1.6076e+06	1.19793e+06	1.33669e+06	1.46426e+06	846645	1.8385e+06	792301	2.07062e+06	1.39785e+06	736207	1.19498e+06	491673	703003	509274	454981	863167	1.11408e+06
Kif2a	P28740	Kinesin-like protein KIF2A OS=Mus musculus OX=10090 GN=Kif2a PE=1 SV=2	3.4781e+06	1.19207e+06	1.70716e+06	1.47251e+06	1.42767e+06	2.00365e+06	1.31681e+06	341704	527756	1.72545e+06	1.43951e+06	947175	376531	10563.3	10563.3	1.09955e+06	3.60544e+06
Kif5b	Q61768	Kinesin-1 heavy chain OS=Mus musculus OX=10090 GN=Kif5b PE=1 SV=3	10563.3	10563.3	10563.3	10563.3	10563.3	10563.3	10563.3	10563.3	10563.3	10563.3	10563.3	10563.3	270627	10563.3	391075	10563.3	114571
Klhl11	Q8CE33	Kelch-like protein 11 OS=Mus musculus OX=10090 GN=Klhl11 PE=1 SV=1	10563.3	532233	10563.3	580647	1.0733e+06	837905	10563.3	10563.3	10563.3	1.51777e+06	10563.3	10563.3	10563.3	10563.3	10563.3	10563.3	10563.3
Klk1b3	P00756	Kallikrein 1-related peptidase b3 OS=Mus musculus OX=10090 GN=Klk1b3 PE=1 SV=1	744198	1.6016e+06	1.95123e+06	1.51386e+06	1.00171e+06	1.05242e+06	568784	304272	10563.3	370870	887521	10563.3	10563.3	10563.3	10563.3	10563.3	10563.3
Klkb1	P26262	Plasma kallikrein OS=Mus musculus OX=10090 GN=Klkb1 PE=1 SV=2	4.0607e+09	3.99141e+09	3.74643e+09	3.84428e+09	3.35431e+09	3.38351e+09	1.27806e+09	2.26081e+09	1.20281e+09	2.11601e+09	4.06358e+09	3.68331e+09	2.72886e+09	3.56859e+09	1.39639e+09	2.4961e+09	2.47858e+09
Kng1	O08677	Kininogen-1 OS=Mus musculus OX=10090 GN=Kng1 PE=1 SV=1	6.72826e+09	5.8981e+09	4.70421e+09	4.37938e+09	5.43514e+09	4.07562e+09	3.30948e+09	4.08973e+09	3.04282e+09	3.44721e+09	3.38667e+09	3.61863e+09	3.71386e+09	4.20611e+09	3.81806e+09	3.71242e+09	3.95559e+09
Kpnb1	P70168	Importin subunit beta-1 OS=Mus musculus OX=10090 GN=Kpnb1 PE=1 SV=2	1.70846e+07	1.04576e+07	8.60114e+06	7.6989e+06	1.06731e+07	4.60975e+06	5.94214e+06	2.13321e+06	6.25127e+06	2.17821e+06	4.30625e+06	1.31201e+06	763542	950904	656628	509075	1.92714e+06
Krt1	P04104	Keratin, type II cytoskeletal 1 OS=Mus musculus OX=10090 GN=Krt1 PE=1 SV=4	2.03488e+07	1.9475e+07	3.86612e+07	2.03737e+07	3.12911e+07	5.35306e+07	4.51221e+07	1.04676e+07	4.24821e+07	2.30432e+07	3.15828e+07	3.63106e+07	3.30849e+07	2.00298e+07	2.01984e+07	4.62448e+07	2.65843e+07
Krt10	P02535	Keratin, type I cytoskeletal 10 OS=Mus musculus OX=10090 GN=Krt10 PE=1 SV=3	1.96989e+08	1.05616e+08	8.95117e+08	4.14599e+08	6.51004e+08	7.79438e+08	3.67242e+08	2.75102e+08	3.15759e+08	3.76461e+08	5.96244e+08	7.28152e+08	7.37728e+07	4.89616e+07	2.31085e+07	1.01157e+08	8.42452e+07
Krt13	P08730	Keratin, type I cytoskeletal 13 OS=Mus musculus OX=10090 GN=Krt13 PE=1 SV=2	10563.3	10563.3	10563.3	10563.3	10563.3	10563.3	10563.3	10563.3	10563.3	10563.3	10563.3	10563.3	1.88232e+07	1.0699e+07	1.05735e+07	2.84997e+07	1.96729e+07
Krt15	Q61414	Keratin, type I cytoskeletal 15 OS=Mus musculus OX=10090 GN=Krt15 PE=1 SV=2	10563.3	289127	232423	1.29421e+06	129445	403240	665261	186029	598999	10563.3	364256	10563.3	10563.3	10563.3	10563.3	10563.3	10563.3
Krt16	Q9Z2K1	Keratin, type I cytoskeletal 16 OS=Mus musculus OX=10090 GN=Krt16 PE=1 SV=3	2.46738e+07	1.37792e+07	2.84532e+07	2.57232e+07	2.98296e+07	4.18749e+07	3.12052e+07	1.97804e+07	3.92141e+07	2.00579e+07	2.94808e+07	3.45059e+07	1.01197e+06	10563.3	10563.3	1.23114e+06	769024
Krt17	Q9QWL7	Keratin, type I cytoskeletal 17 OS=Mus musculus OX=10090 GN=Krt17 PE=1 SV=3	4.96694e+07	3.68022e+07	7.06292e+07	4.65845e+07	5.7665e+07	1.07065e+08	9.64268e+07	2.74e+07	9.69368e+07	4.14291e+07	6.77844e+07	7.24045e+07	10563.3	10563.3	10563.3	10563.3	10563.3
Krt2	Q3TTY5	Keratin, type II cytoskeletal 2 epidermal OS=Mus musculus OX=10090 GN=Krt2 PE=1 SV=1	2.68418e+07	1.57225e+07	2.57272e+07	1.59592e+07	3.10658e+07	4.51795e+07	3.27503e+07	1.50687e+07	3.78427e+07	1.84008e+07	2.68312e+07	3.32686e+07	2.53532e+08	4.09732e+08	2.67368e+08	6.05182e+08	3.00872e+07
Krt31	Q61765	Keratin, type I cuticular Ha1 OS=Mus musculus OX=10090 GN=Krt31 PE=1 SV=2	10563.3	10563.3	10563.3	10563.3	10563.3	10563.3	10563.3	10563.3	10563.3	10563.3	10563.3	10563.3	10563.3	10563.3	10563.3	10563.3	10563.3
Krt35	Q497I4	Keratin, type I cuticular Ha5 OS=Mus musculus OX=10090 GN=Krt35 PE=1 SV=1	10563.3	10563.3	10563.3	1.21097e+06	10563.3	10563.3	628771	10563.3	10563.3	1.06381e+06	1.4768e+06	10563.3	10563.3	10563.3	10563.3	10563.3	10563.3
Krt42	Q6IFX2	Keratin, type I cytoskeletal 42 OS=Mus musculus OX=10090 GN=Krt42 PE=1 SV=1	2.27502e+06	1.82079e+06	5.77514e+06	1.03452e+07	4.9194e+06	8.73176e+06	1.1187e+07	459431	1.04055e+07	4.11813e+06	6.97895e+06	6.21722e+06	2.51651e+06	725986	10563.3	3.38977e+06	2.19452e+06
Krt5	Q922U2	Keratin, type II cytoskeletal 5 OS=Mus musculus OX=10090 GN=Krt5 PE=1 SV=1	1.87029e+08	1.40883e+08	2.15905e+08	2.27836e+08	2.39145e+08	2.75504e+08	2.38353e+08	5.85758e+07	2.67441e+08	2.03027e+08	3.1207e+08	4.36778e+08	5.42947e+07	3.67286e+07	3.76638e+07	7.78543e+07	4.11852e+07
Krt6a	P50446	Keratin, type II cytoskeletal 6A OS=Mus musculus OX=10090 GN=Krt6a PE=1 SV=3	1.10686e+06	513831	2.90435e+06	6.76077e+06	3.21852e+06	4.54954e+06	2.00977e+07	10563.3	1.86241e+07	1.063e+07	1.00828e+07	5.8461e+06	7.75675e+06	1.00689e+07	6.73204e+06	7.89626e+06	5.29511e+06
Krt72	Q6IME9	Keratin, type II cytoskeletal 72 OS=Mus musculus OX=10090 GN=Krt72 PE=3 SV=1	10563.3	10563.3	10563.3	10563.3	10563.3	10563.3	10563.3	10563.3	10563.3	1.71228e+06	10563.3	10563.3	10563.3	10563.3	10563.3	383590	552030
Krt73	Q6NXH9	Keratin, type II cytoskeletal 73 OS=Mus musculus OX=10090 GN=Krt73 PE=1 SV=1	3.76843e+07	2.58375e+07	5.38454e+07	3.62803e+07	4.91088e+07	7.0183e+07	6.2495e+07	2.72355e+07	7.73168e+07	3.88423e+07	5.48394e+07	5.4353e+07	10563.3	10563.3	10563.3	10563.3	10563.3
Krt75	Q8BGZ7	Keratin, type II cytoskeletal 75 OS=Mus musculus OX=10090 GN=Krt75 PE=1 SV=1	1.62532e+06	996073	2.39837e+06	711363	1.9046e+06	3.16162e+06	2.1866e+06	10563.3	2.38464e+06	995664	2.43957e+06	1.82003e+06	10563.3	10563.3	10563.3	10563.3	10563.3
Krt76	Q3UV17	Keratin, type II cytoskeletal 2 oral OS=Mus musculus OX=10090 GN=Krt76 PE=1 SV=1	1.99031e+07	1.90728e+07	3.70531e+07	2.3418e+07	2.44293e+07	4.32461e+07	4.60815e+07	1.33157e+07	4.78822e+07	2.60206e+07	3.15549e+07	2.85754e+07	1.59478e+07	9.99072e+06	1.3927e+07	2.92782e+07	2.25807e+07
Krt79	Q8VED5	Keratin, type II cytoskeletal 79 OS=Mus musculus OX=10090 GN=Krt79 PE=1 SV=2	1.44981e+07	7.6449e+06	1.54081e+07	1.99537e+07	1.32468e+07	2.57926e+07	2.40103e+07	8.86375e+06	2.57145e+07	9.10135e+06	1.75741e+07	1.69291e+07	10563.3	10563.3	10563.3	8.00692e+06	9.61219e+06
Krt81	Q9ERE2	Keratin, type II cuticular Hb1 OS=Mus musculus OX=10090 GN=Krt81 PE=2 SV=2	4.23924e+06	6.78385e+06	4.44359e+06	3.949e+06	2.96484e+06	4.57851e+06	1.32519e+06	773609	796892	875786	1.92934e+06	1.22976e+06	10563.3	10563.3	10563.3	10563.3	10563.3
Krt82	Q99M74	Keratin, type II cuticular Hb2 OS=Mus musculus OX=10090 GN=Krt82 PE=1 SV=2	10563.3	10563.3	10563.3	10563.3	10563.3	10563.3	10563.3	10563.3	10563.3	10563.3	10563.3	10563.3	9.47663e+06	5.50973e+06	4.22382e+06	1.01266e+07	1.78439e+07
Krtdap	Q3V2T4	Keratinocyte differentiation-associated protein OS=Mus musculus OX=10090 GN=Krtdap PE=2 SV=1	10563.3	483472	10563.3	899832	10563.3	467577	511061	206556	10563.3	641834	397047	206622	10563.3	10563.3	10563.3	10563.3	10563.3
Kynu	Q9CXF0	Kynureninase OS=Mus musculus OX=10090 GN=Kynu PE=1 SV=3	10563.3	10563.3	10563.3	10563.3	10563.3	10563.3	10563.3	10563.3	10563.3	10563.3	10563.3	10563.3	190469	366547	10563.3	10563.3	538650
L1cam	P11627	Neural cell adhesion molecule L1 OS=Mus musculus OX=10090 GN=L1cam PE=1 SV=1	1.6224e+06	657105	980229	378567	1.33945e+06	1.2236e+06	278506	10563.3	424807	513725	466991	281959	10563.3	10563.3	10563.3	10563.3	10563.3
Lag3	Q61790	Lymphocyte activation gene 3 protein OS=Mus musculus OX=10090 GN=Lag3 PE=1 SV=1	1.15055e+06	1.10517e+06	825276	1.05159e+06	1.40213e+06	637522	525048	1.32406e+06	886604	443809	10563.3	940460	10563.3	10563.3	10563.3	10563.3	10563.3
Lama2	Q60675	Laminin subunit alpha-2 OS=Mus musculus OX=10090 GN=Lama2 PE=1 SV=2	1.45501e+06	1.14861e+06	383158	823048	496667	833687	151635	370339	195332	304699	298380	10563.3	295911	292719	149593	184018	262321
Lama3	Q61789	Laminin subunit alpha-3 OS=Mus musculus OX=10090 GN=Lama3 PE=1 SV=4	196709	10563.3	10563.3	10563.3	267268	10563.3	10563.3	10563.3	192799	10563.3	10563.3	10563.3	10563.3	10563.3	10563.3	10563.3	10563.3
Lamb1	P02469	Laminin subunit beta-1 OS=Mus musculus OX=10090 GN=Lamb1 PE=1 SV=3	3.54782e+07	3.79911e+07	2.34494e+07	2.16101e+07	1.63512e+07	1.65025e+07	1.02381e+07	4.21736e+06	3.52803e+06	1.85912e+07	7.57039e+06	5.99482e+06	5.92699e+06	4.68249e+06	2.84147e+06	4.62554e+06	6.18113e+06
Lamc1	P02468	Laminin subunit gamma-1 OS=Mus musculus OX=10090 GN=Lamc1 PE=1 SV=2	2.1092e+07	4.2117e+07	9.8877e+07	5.48019e+07	5.59678e+06	7.91633e+07	1.1633e+08	793313	5.53737e+07	1.04353e+08	4.65988e+07	3.04659e+07	8.52317e+06	2.97159e+06	5.0349e+06	9.72019e+06	1.07975e+07
Lamc3	Q9R0B6	Laminin subunit gamma-3 OS=Mus musculus OX=10090 GN=Lamc3 PE=1 SV=2	347040	472475	10563.3	10563.3	10563.3	1.52088e+06	10563.3	10563.3	10563.3	10563.3	10563.3	10563.3	10563.3	10563.3	10563.3	10563.3	10563.3
Lbp	Q61805	Lipopolysaccharide-binding protein OS=Mus musculus OX=10090 GN=Lbp PE=1 SV=2	3.00997e+08	3.92078e+08	3.83183e+08	3.72631e+08	3.98212e+08	3.65379e+08	5.82651e+08	4.96085e+08	6.87633e+08	2.80739e+08	3.75004e+08	3.67343e+08	9.25773e+08	5.86495e+08	5.03774e+08	8.24528e+08	7.70152e+08
Lcat	P16301	Phosphatidylcholine-sterol acyltransferase OS=Mus musculus OX=10090 GN=Lcat PE=1 SV=2	9.82996e+08	1.15534e+09	1.28761e+09	1.13456e+09	1.42294e+09	1.15366e+09	1.27901e+09	8.92073e+08	1.08102e+09	2.44952e+09	1.26721e+09	1.35405e+09	1.18705e+09	1.1783e+09	7.92144e+08	1.52684e+09	1.49091e+09
Lcp1	Q61233	Plastin-2 OS=Mus musculus OX=10090 GN=Lcp1 PE=1 SV=4	3.62245e+07	3.37415e+07	2.92131e+07	2.58584e+07	3.20493e+07	3.76826e+07	8.39989e+06	1.46643e+07	7.95528e+07	2.97384e+07	2.46142e+07	1.62294e+07	3.59339e+07	2.938e+07	3.13322e+07	3.94614e+07	3.38278e+07
Ldha	P06151	L-lactate dehydrogenase A chain OS=Mus musculus OX=10090 GN=Ldha PE=1 SV=3	3.48748e+06	6.32996e+06	2.40437e+06	9.01317e+06	6.56756e+06	1.78118e+06	4.83552e+06	2.63848e+06	4.84388e+06	2.53588e+06	4.81655e+06	915577	3.93921e+06	4.56337e+06	6.08049e+06	5.48046e+06	5.32669e+06
Ldhb	P16125	L-lactate dehydrogenase B chain OS=Mus musculus OX=10090 GN=Ldhb PE=1 SV=2	1.50309e+06	1.58503e+06	722714	1.09949e+07	1.27746e+06	2.09546e+06	3.3543e+06	837150	243908	3.15405e+06	388732	511991	2.08088e+06	10563.3	8.57679e+06	10563.3	10563.3
Ldlr	P35951	Low-density lipoprotein receptor OS=Mus musculus OX=10090 GN=Ldlr PE=1 SV=2	10563.3	10563.3	10563.3	10563.3	10563.3	10563.3	10563.3	10563.3	10563.3	10563.3	10563.3	10563.3	2.98116e+06	1.44632e+06	1.22153e+06	1.80057e+06	2.89252e+06
Lect2	O88803	Leukocyte cell-derived chemotaxin-2 OS=Mus musculus OX=10090 GN=Lect2 PE=1 SV=1	532561	368128	9.90953e+06	3.45423e+06	10563.3	8.75965e+06	6.3991e+06	5.72222e+06	3.98475e+06	5.92409e+06	3.3678e+06	4.21607e+06	3.75555e+06	1.33376e+06	5.14417e+06	2.90954e+06	4.18081e+06
Leg1	Q8C6C9	Protein LEG1 homolog OS=Mus musculus OX=10090 GN=Leg1 PE=2 SV=2	1.34839e+06	479547	10563.3	614013	10563.3	10563.3	10563.3	10563.3	10563.3	10563.3	10563.3	10563.3	10563.3	10563.3	10563.3	10563.3	10563.3
Lep	P41160	Leptin OS=Mus musculus OX=10090 GN=Lep PE=1 SV=1	10563.3	10563.3	10563.3	10563.3	10563.3	10563.3	1.22211e+07	7.03265e+06	2.13441e+06	6.2136e+06	1.10387e+07	2.3982e+06	8.95881e+06	1.12922e+06	10563.3	8.93956e+06	5.40185e+06
Lgals1	P16045	Galectin-1 OS=Mus musculus OX=10090 GN=Lgals1 PE=1 SV=3	2.32953e+06	3.90966e+06	3.70389e+06	4.52689e+06	7.68608e+06	3.03448e+06	5.97528e+06	1.58502e+07	1.83128e+07	1.36634e+07	2.26067e+07	1.33347e+07	8.61448e+06	1.1467e+06	2.90977e+06	5.46198e+06	1.01683e+07
Lgals3	P16110	Galectin-3 OS=Mus musculus OX=10090 GN=Lgals3 PE=1 SV=3	7.62618e+06	1.0137e+07	8.52842e+06	1.04609e+07	1.09669e+07	1.18078e+07	2.81649e+07	4.3877e+07	5.36041e+07	4.81717e+06	3.39729e+07	1.60276e+07	2.18356e+07	5.7084e+06	1.06232e+07	1.65431e+07	2.99372e+07
Lgals3bp	Q07797	Galectin-3-binding protein OS=Mus musculus OX=10090 GN=Lgals3bp PE=1 SV=1	5.21714e+07	5.22088e+07	3.0698e+07	2.35918e+07	5.36832e+07	1.64817e+07	2.56175e+07	2.97582e+07	1.25039e+07	3.46235e+07	9.96062e+06	1.25936e+07	2.1199e+07	5.44056e+06	8.09798e+06	2.48969e+07	5.1994e+07
Lgals9	O08573	Galectin-9 OS=Mus musculus OX=10090 GN=Lgals9 PE=1 SV=1	10563.3	626452	10563.3	10563.3	10563.3	512823	1.07642e+06	10563.3	615370	10563.3	10563.3	10563.3	913693	368075	1.05757e+06	1.37337e+06	1.78024e+06
Lifr	P42703	Leukemia inhibitory factor receptor OS=Mus musculus OX=10090 GN=Lifr PE=1 SV=1	3.36348e+08	2.98911e+08	1.21336e+08	2.25265e+08	1.52552e+08	1.25871e+08	2.83988e+07	1.23465e+07	1.74443e+07	7.87504e+07	2.8965e+07	2.61086e+07	3.14375e+06	8.06987e+06	4.51698e+06	3.77522e+06	3.01049e+06
Lims1	Q99JW4	LIM and senescent cell antigen-like-containing domain protein 1 OS=Mus musculus OX=10090 GN=Lims1 PE=1 SV=3	3.87922e+06	1.87617e+07	2.50362e+07	3.00966e+07	5.553e+06	7.42562e+06	4.50243e+06	1.4382e+06	3.61236e+06	5.69302e+06	3.52453e+07	1.45417e+06	9.47244e+06	5.14472e+06	2.23513e+06	1.11747e+07	1.34554e+07
Lipa	Q9Z0M5	Lysosomal acid lipase/cholesteryl ester hydrolase OS=Mus musculus OX=10090 GN=Lipa PE=1 SV=2	10563.3	10563.3	10563.3	250498	10563.3	10563.3	10563.3	10563.3	10563.3	10563.3	308552	10563.3	10563.3	10563.3	10563.3	10563.3	10563.3
Lipc	P27656	Hepatic triacylglycerol lipase OS=Mus musculus OX=10090 GN=Lipc PE=2 SV=2	5.16946e+07	4.85247e+07	1.09442e+08	6.60101e+07	5.81271e+07	7.29361e+07	1.12709e+08	6.07249e+07	1.11498e+08	3.98723e+07	1.44417e+08	1.26723e+08	8.91172e+07	7.04024e+07	5.21511e+07	7.955e+07	8.59155e+07
Lipg	Q9WVG5	Endothelial lipase OS=Mus musculus OX=10090 GN=Lipg PE=2 SV=3	1.18793e+07	7.32532e+06	2.40686e+06	3.09784e+06	5.48929e+06	2.12154e+06	2.17149e+07	4.81458e+06	2.59257e+07	1.45807e+07	3.7464e+06	1.94143e+07	10563.3	10563.3	10563.3	10563.3	10563.3
Lire1	P11260	LINE-1 retrotransposable element ORF1 protein OS=Mus musculus OX=10090 GN=Lire1 PE=1 SV=2	10563.3	10563.3	10563.3	10563.3	10563.3	10563.3	10563.3	10563.3	10563.3	436255	374105	10563.3	10563.3	10563.3	10563.3	10563.3	10563.3
Lman1	Q9D0F3	Protein ERGIC-53 OS=Mus musculus OX=10090 GN=Lman1 PE=1 SV=1	1.20601e+06	1.32383e+06	1.78538e+06	2.8461e+06	2.77004e+06	2.26165e+06	1.5642e+06	817476	3.38987e+06	572647	2.19692e+06	1.05641e+06	1.73891e+06	1.75616e+06	7.07171e+06	1.87472e+06	957343
Lman2	Q9DBH5	Vesicular integral-membrane protein VIP36 OS=Mus musculus OX=10090 GN=Lman2 PE=1 SV=2	10563.3	10563.3	10563.3	400600	589121	583106	760374	10563.3	1.01579e+06	635604	529424	397808	1.30119e+06	1.61549e+06	967344	1.25061e+06	1.5974e+06
Lmna	P48678	Prelamin-A/C OS=Mus musculus OX=10090 GN=Lmna PE=1 SV=2	7.06093e+07	6.03347e+07	3.5898e+07	2.35134e+07	9.34434e+07	3.08417e+07	8.33868e+07	1.22667e+08	1.31486e+08	1.73823e+08	1.83907e+07	6.98813e+07	230872	10563.3	10563.3	251554	255495
Lmnb1	P14733	Lamin-B1 OS=Mus musculus OX=10090 GN=Lmnb1 PE=1 SV=3	365547	575141	892221	622286	10563.3	1.94837e+07	1.56692e+06	10563.3	1.50409e+06	1.06709e+06	928529	10563.3	1.0473e+06	365271	332732	1.01779e+06	1.33126e+06
Lox	P28301	Protein-lysine 6-oxidase OS=Mus musculus OX=10090 GN=Lox PE=1 SV=1	10563.3	10563.3	10563.3	247007	10563.3	10563.3	1.06477e+06	636056	615283	10563.3	617810	10563.3	645053	260724	687603	532946	303713
Loxl1	P97873	Lysyl oxidase homolog 1 OS=Mus musculus OX=10090 GN=Loxl1 PE=2 SV=3	3.62901e+07	3.09966e+07	3.86042e+07	4.46009e+07	5.3554e+07	3.91488e+07	5.36244e+07	4.39766e+07	3.90405e+07	2.59242e+07	3.64912e+07	4.16598e+07	7.02761e+07	5.90433e+07	6.96922e+07	6.68849e+07	7.70021e+07
Lpl	P11152	Lipoprotein lipase OS=Mus musculus OX=10090 GN=Lpl PE=1 SV=3	2.94351e+07	2.13027e+07	1.75916e+07	3.8592e+07	3.78537e+07	2.88786e+07	1.1637e+07	7.06451e+06	6.30269e+06	4.79067e+06	5.99914e+06	1.93696e+06	9.44378e+06	4.03364e+06	6.35798e+06	8.83624e+06	7.11125e+06
Lrig3	Q6P1C6	Leucine-rich repeats and immunoglobulin-like domains protein 3 OS=Mus musculus OX=10090 GN=Lrig3 PE=1 SV=1	720290	706081	652820	958329	939040	446257	10563.3	10563.3	10563.3	10563.3	452873	201564	10563.3	10563.3	10563.3	10563.3	10563.3
Lrp1	Q91ZX7	Prolow-density lipoprotein receptor-related protein 1 OS=Mus musculus OX=10090 GN=Lrp1 PE=1 SV=1	2.98681e+08	3.42774e+08	3.30185e+08	3.61172e+08	2.90219e+08	3.61581e+08	1.86614e+08	1.32816e+08	1.45099e+08	2.85755e+08	2.92325e+08	2.43559e+08	1.8744e+08	1.80348e+08	1.08281e+08	1.86116e+08	2.08954e+08
Lrp1b	Q9JI18	Low-density lipoprotein receptor-related protein 1B OS=Mus musculus OX=10090 GN=Lrp1b PE=1 SV=1	2.61533e+07	2.36879e+07	3.79863e+07	9.43506e+06	1.6246e+07	1.71482e+08	2.03458e+07	3.8802e+07	9.81242e+07	4.52739e+07	4.35666e+07	4.76251e+07	4.72663e+07	6.23035e+07	2.17615e+08	4.75016e+07	8.87176e+07
Lrriq4	A6H6A4	Leucine-rich repeat and IQ domain-containing protein 4 OS=Mus musculus OX=10090 GN=Lrriq4 PE=2 SV=1	8.52795e+07	4.92351e+07	5.61422e+07	6.39765e+07	6.96389e+07	3.39157e+07	7.34887e+07	5.5303e+07	3.49366e+07	3.38306e+07	3.56119e+07	3.77003e+07	5.56039e+07	5.59887e+07	2.01556e+07	5.07358e+07	4.98059e+07
Lsm4	Q9QXA5	U6 snRNA-associated Sm-like protein LSm4 OS=Mus musculus OX=10090 GN=Lsm4 PE=1 SV=1	10563.3	226914	348276	483864	266571	441113	10563.3	315166	186196	205681	244240	10563.3	10563.3	560678	199957	10563.3	405753
Lta4h	P24527	Leukotriene A-4 hydrolase OS=Mus musculus OX=10090 GN=Lta4h PE=1 SV=4	327503	10563.3	10563.3	10563.3	206352	680687	1.21508e+06	10563.3	3.0731e+06	5.63604e+06	177449	10563.3	10563.3	10563.3	10563.3	10563.3	10563.3
Ltbp1	Q8CG19	Latent-transforming growth factor beta-binding protein 1 OS=Mus musculus OX=10090 GN=Ltbp1 PE=1 SV=2	6.28136e+07	6.67566e+07	4.44182e+07	2.11593e+07	3.78097e+07	1.97693e+07	5.36825e+07	2.28689e+07	3.13563e+07	3.86749e+07	1.06177e+07	8.88054e+06	6.21726e+06	7.10107e+06	1.45901e+07	4.79328e+06	1.93413e+07
Ltbp4	Q8K4G1	Latent-transforming growth factor beta-binding protein 4 OS=Mus musculus OX=10090 GN=Ltbp4 PE=1 SV=2	6.38285e+06	1.07949e+07	4.81969e+06	7.22421e+06	8.14003e+06	5.13985e+06	2.46526e+06	637510	1.85033e+06	4.51847e+06	1.45624e+06	1.45502e+06	10563.3	10563.3	10563.3	10563.3	10563.3
Ltf	P08071	Lactotransferrin OS=Mus musculus OX=10090 GN=Ltf PE=1 SV=4	3.47351e+06	7.23805e+06	4.07387e+06	1.19953e+07	2.21032e+06	1.41159e+07	6.44642e+06	1.93129e+06	1.29185e+08	6.85774e+06	6.03969e+06	1.1077e+07	1.19661e+07	4.06124e+06	4.63591e+07	8.30619e+06	770342
Lum	P51885	Lumican OS=Mus musculus OX=10090 GN=Lum PE=1 SV=2	4.28132e+08	3.28364e+08	2.99872e+08	4.05188e+08	4.45869e+08	3.30788e+08	1.37884e+08	1.52268e+08	7.01828e+07	1.42556e+08	1.36753e+08	8.22717e+07	2.69048e+08	1.8179e+08	1.49468e+08	2.47323e+08	2.89633e+08
Ly6e	Q64253	Lymphocyte antigen 6E OS=Mus musculus OX=10090 GN=Ly6e PE=1 SV=2	2.494e+06	3.99942e+06	4.52886e+06	5.41694e+06	4.92532e+06	6.25512e+06	3.7761e+07	10563.3	1.75161e+07	7.64937e+06	6.31149e+06	4.10099e+06	10563.3	10563.3	10563.3	10563.3	10563.3
Ly6g6c	Q9Z1Q4	Lymphocyte antigen 6 complex locus protein G6c OS=Mus musculus OX=10090 GN=Ly6g6c PE=1 SV=1	10563.3	10563.3	10563.3	10563.3	10563.3	10563.3	10563.3	150804	10563.3	500072	10563.3	708227	10563.3	10563.3	10563.3	10563.3	10563.3
Lyn	P25911	Tyrosine-protein kinase Lyn OS=Mus musculus OX=10090 GN=Lyn PE=1 SV=4	4.19058e+06	1.5928e+06	2.36158e+06	1.37497e+06	1.7436e+06	2.05386e+06	1.67039e+07	10563.3	4.00803e+07	7.66364e+06	5.93817e+06	1.48263e+07	10563.3	10563.3	10563.3	10563.3	10563.3
Lypla1	P97823	Acyl-protein thioesterase 1 OS=Mus musculus OX=10090 GN=Lypla1 PE=1 SV=1	609685	1.42321e+06	1.54571e+06	1.66968e+06	1.76825e+06	673025	10563.3	892110	924149	1.48326e+06	3.42818e+06	10563.3	817040	675217	2.2409e+06	1.42963e+06	1.39985e+06
Lysmd3	Q99LE3	LysM and putative peptidoglycan-binding domain-containing protein 3 OS=Mus musculus OX=10090 GN=Lysmd3 PE=2 SV=1	1.43984e+06	970721	1.68788e+06	1.53455e+06	1.10395e+06	1.69634e+06	290562	982613	341092	1.47863e+06	2.08138e+06	1.82166e+06	6.72007e+06	7.0412e+06	3.41947e+06	6.25287e+06	6.38441e+06
Lyz1	P17897	Lysozyme C-1 OS=Mus musculus OX=10090 GN=Lyz1 PE=1 SV=1	5.57084e+07	6.27195e+07	4.80528e+07	4.73547e+07	3.65385e+07	3.95144e+07	1.02689e+08	4.57554e+07	1.61908e+08	6.12528e+07	3.72674e+07	3.61921e+07	10563.3	10563.3	10563.3	10563.3	10563.3
Lyz2	P08905	Lysozyme C-2 OS=Mus musculus OX=10090 GN=Lyz2 PE=1 SV=2	1.87089e+07	2.1414e+07	1.43515e+07	1.38279e+07	6.5558e+06	1.61842e+07	1.94496e+07	9.60132e+06	5.14072e+07	1.48054e+07	6.9085e+06	1.10001e+07	1.51921e+07	725209	1.82296e+07	9.84712e+06	1.07618e+07
Man1a1	P45700	Mannosyl-oligosaccharide 1,2-alpha-mannosidase IA OS=Mus musculus OX=10090 GN=Man1a1 PE=1 SV=1	4.64535e+07	4.98197e+07	4.96643e+07	4.85027e+07	5.30325e+07	4.4235e+07	3.82386e+07	3.4154e+07	3.46684e+07	2.95342e+07	4.68987e+07	4.52232e+07	4.59503e+07	3.81795e+07	3.293e+07	5.32735e+07	2.57798e+07
Man1b1	A2AJ15	Endoplasmic reticulum mannosyl-oligosaccharide 1,2-alpha-mannosidase OS=Mus musculus OX=10090 GN=Man1b1 PE=1 SV=1	10563.3	10563.3	10563.3	10563.3	10563.3	10563.3	10563.3	10563.3	10563.3	10563.3	10563.3	10563.3	10563.3	10563.3	1.50991e+06	448832	384304
Man2a1	P27046	Alpha-mannosidase 2 OS=Mus musculus OX=10090 GN=Man2a1 PE=1 SV=2	472864	348900	494985	340248	386815	274171	276123	340034	10563.3	854243	1.12432e+06	395211	2.18682e+06	1.84612e+06	1.60023e+06	3.26923e+06	2.5026e+06
Man2b1	O09159	Lysosomal alpha-mannosidase OS=Mus musculus OX=10090 GN=Man2b1 PE=1 SV=4	1.9434e+06	1.99004e+06	998462	2.05361e+06	1.94686e+06	1.40925e+06	406005	10563.3	1.2825e+06	394746	911501	910100	276152	10563.3	754501	631746	225316
Man2c1	Q91W89	Alpha-mannosidase 2C1 OS=Mus musculus OX=10090 GN=Man2c1 PE=1 SV=1	149276	443076	10563.3	285142	344427	244034	10563.3	10563.3	10563.3	10563.3	10563.3	10563.3	295443	10563.3	10563.3	10563.3	1.23689e+06
Map3k2	Q61083	Mitogen-activated protein kinase kinase kinase 2 OS=Mus musculus OX=10090 GN=Map3k2 PE=1 SV=2	2.67359e+06	2.56466e+06	1.55632e+06	3.11055e+06	3.02854e+06	2.75909e+07	3.53938e+06	1.78393e+06	3.64058e+06	3.45301e+06	4.385e+06	4.91803e+06	2.6017e+07	1.39243e+07	1.96953e+07	2.91263e+07	1.20526e+07
Map4	P27546	Microtubule-associated protein 4 OS=Mus musculus OX=10090 GN=Map4 PE=1 SV=3	533397	480743	423474	357854	431410	318546	230868	468837	10563.3	10563.3	10563.3	10563.3	10563.3	10563.3	10563.3	10563.3	10563.3
Mapk14	P47811	Mitogen-activated protein kinase 14 OS=Mus musculus OX=10090 GN=Mapk14 PE=1 SV=3	366541	10563.3	611568	303085	10563.3	10563.3	280259	10563.3	10563.3	10563.3	573454	10563.3	298612	154697	155803	393150	725768
Mapre1	Q61166	Microtubule-associated protein RP/EB family member 1 OS=Mus musculus OX=10090 GN=Mapre1 PE=1 SV=3	10563.3	4.34027e+06	2.55468e+06	2.57207e+06	2.61599e+06	10563.3	2.11276e+06	1.08356e+06	10563.3	2.0517e+06	2.68296e+06	10563.3	10563.3	10563.3	10563.3	10563.3	10563.3
Mapre2	Q8R001	Microtubule-associated protein RP/EB family member 2 OS=Mus musculus OX=10090 GN=Mapre2 PE=1 SV=1	10563.3	571820	233440	274022	10563.3	10563.3	10563.3	266259	10563.3	408706	385979	10563.3	10563.3	10563.3	10563.3	10563.3	10563.3
Marco	Q60754	Macrophage receptor MARCO OS=Mus musculus OX=10090 GN=Marco PE=1 SV=1	10563.3	10563.3	10563.3	10563.3	10563.3	10563.3	210239	10563.3	4.55342e+06	10563.3	10563.3	10563.3	10563.3	10563.3	10563.3	10563.3	10563.3
Masp1	P98064	Mannan-binding lectin serine protease 1 OS=Mus musculus OX=10090 GN=Masp1 PE=1 SV=2	2.68225e+08	3.46167e+08	3.56987e+08	3.5106e+08	3.76131e+08	4.63702e+08	3.02239e+08	2.50476e+08	2.46926e+08	3.39568e+08	3.60295e+08	3.37391e+08	1.83568e+08	2.7777e+08	2.04776e+08	2.05813e+08	2.4677e+08
Masp2	Q91WP0	Mannan-binding lectin serine protease 2 OS=Mus musculus OX=10090 GN=Masp2 PE=1 SV=1	2.67799e+08	4.11134e+08	3.19177e+08	3.49592e+08	3.28362e+08	4.90636e+08	3.95476e+08	3.1683e+08	2.50603e+08	3.8894e+08	4.23989e+08	3.73128e+08	5.01235e+08	4.90502e+08	6.02222e+08	6.51841e+08	5.1752e+08
Mat1a	Q91X83	S-adenosylmethionine synthase isoform type-1 OS=Mus musculus OX=10090 GN=Mat1a PE=1 SV=1	686991	1.25368e+06	481346	293378	1.16014e+06	280968	1.5682e+06	3.06991e+07	1.0152e+07	3.51204e+07	1.83166e+07	1.95609e+06	1.26046e+07	3.11663e+07	6.3016e+07	2.00038e+07	6.71556e+07
Mbd5	B1AYB6	Methyl-CpG-binding domain protein 5 OS=Mus musculus OX=10090 GN=Mbd5 PE=2 SV=1	7.42877e+06	4.32018e+06	9.24358e+06	8.24136e+06	2.58498e+07	2.73289e+07	1.34256e+06	1.3932e+06	262695	10563.3	503810	10563.3	10563.3	10563.3	10563.3	10563.3	10563.3
Mbl1	P39039	Mannose-binding protein A OS=Mus musculus OX=10090 GN=Mbl1 PE=1 SV=1	9.53059e+07	1.30687e+08	1.15229e+08	1.3834e+08	1.29378e+08	1.49285e+08	6.80737e+07	5.78165e+07	1.3105e+08	5.37279e+07	1.83687e+08	1.29576e+08	2.32756e+08	2.09864e+08	6.01551e+08	2.52594e+08	1.99169e+08
Mbl2	P41317	Mannose-binding protein C OS=Mus musculus OX=10090 GN=Mbl2 PE=1 SV=2	5.11595e+08	3.6057e+08	2.16264e+08	2.13741e+08	2.11052e+08	1.61543e+08	6.18223e+08	1.88177e+08	7.41497e+08	1.92756e+08	2.3135e+08	3.54143e+08	2.41302e+08	2.58953e+08	2.14953e+08	2.09938e+08	1.39898e+08
Mbp	P04370	Myelin basic protein OS=Mus musculus OX=10090 GN=Mbp PE=1 SV=2	6.00734e+06	5.47971e+06	7.01531e+06	2.24578e+07	3.97149e+06	5.05434e+06	1.28075e+07	368499	6.84587e+06	1.25035e+07	1.2728e+07	1.08996e+07	10563.3	10563.3	10563.3	10563.3	10563.3
Mdh1	P14152	Malate dehydrogenase, cytoplasmic OS=Mus musculus OX=10090 GN=Mdh1 PE=1 SV=3	10563.3	10563.3	10563.3	8.02587e+06	10563.3	10563.3	1.94567e+06	10563.3	42067.2	3.16784e+06	98577	547080	801862	10563.3	3.63666e+06	244422	692061
Mdh2	P08249	Malate dehydrogenase, mitochondrial OS=Mus musculus OX=10090 GN=Mdh2 PE=1 SV=3	374813	10563.3	823756	1.53923e+07	10563.3	926886	4.24461e+06	5.64286e+06	2.44861e+06	3.7261e+06	1.2931e+06	955697	10563.3	10563.3	10563.3	10563.3	10563.3
Me1	P06801	NADP-dependent malic enzyme OS=Mus musculus OX=10090 GN=Me1 PE=1 SV=2	10563.3	10563.3	10563.3	10563.3	10563.3	10563.3	10563.3	10563.3	10563.3	10563.3	10563.3	10563.3	1.56697e+06	133959	396498	2.54606e+06	1.55337e+06
Meltf	Q9R0R1	Melanotransferrin OS=Mus musculus OX=10090 GN=Meltf PE=2 SV=1	10563.3	10563.3	10563.3	10563.3	10563.3	10563.3	10563.3	10563.3	10563.3	10563.3	10563.3	10563.3	1.2914e+06	10563.3	10563.3	1.17478e+06	2.88864e+06
Mettl26	Q9DCS2	Methyltransferase-like 26 OS=Mus musculus OX=10090 GN=Mettl26 PE=1 SV=1	10563.3	10563.3	10563.3	10563.3	10563.3	10563.3	1.84721e+06	10563.3	10563.3	10563.3	10563.3	10563.3	10563.3	10563.3	10563.3	10563.3	10563.3
Mfap4	Q9D1H9	Microfibril-associated glycoprotein 4 OS=Mus musculus OX=10090 GN=Mfap4 PE=1 SV=1	1.41216e+07	1.00629e+07	3.06177e+06	1.07003e+07	5.54085e+06	7.15131e+06	5.49015e+06	2.37999e+06	2.438e+06	1.25193e+07	4.52548e+06	2.79495e+06	10563.3	1.74897e+06	10563.3	4.54554e+06	3.95476e+06
Mfge8	P21956	Lactadherin OS=Mus musculus OX=10090 GN=Mfge8 PE=1 SV=3	10563.3	10563.3	10563.3	10563.3	10563.3	10563.3	10563.3	10563.3	10563.3	10563.3	10563.3	10563.3	1.52458e+06	751524	10563.3	1.588e+06	1.58895e+06
Mfsd2a	Q9DA75	Sodium-dependent lysophosphatidylcholine symporter 1 OS=Mus musculus OX=10090 GN=Mfsd2a PE=1 SV=1	4.57496e+07	3.17199e+07	5.77303e+08	2.98711e+08	9.56666e+07	4.81572e+08	1.5085e+08	10563.3	10563.3	1.63035e+08	2.12454e+08	2.61707e+08	10563.3	10563.3	10563.3	10563.3	10563.3
Mgat1	P27808	Alpha-1,3-mannosyl-glycoprotein 2-beta-N-acetylglucosaminyltransferase OS=Mus musculus OX=10090 GN=Mgat1 PE=1 SV=1	10563.3	229992	194313	10563.3	10563.3	10563.3	199745	242693	10563.3	168162	145664	10563.3	10563.3	10563.3	10563.3	10563.3	10563.3
Mgat5	Q8R4G6	Alpha-1,6-mannosylglycoprotein 6-beta-N-acetylglucosaminyltransferase A OS=Mus musculus OX=10090 GN=Mgat5 PE=1 SV=1	10563.3	291356	206297	10563.3	405869	364406	214467	193504	331438	10563.3	374246	10563.3	413108	448737	255059	424131	1.25487e+06
Mgll	O35678	Monoglyceride lipase OS=Mus musculus OX=10090 GN=Mgll PE=1 SV=1	10563.3	10563.3	10563.3	10563.3	10563.3	10563.3	10563.3	10563.3	10563.3	10563.3	10563.3	10563.3	10563.3	176748	10563.3	10563.3	366235
Mgst1	Q91VS7	Microsomal glutathione S-transferase 1 OS=Mus musculus OX=10090 GN=Mgst1 PE=1 SV=3	10563.3	10563.3	10563.3	10563.3	10563.3	10563.3	10563.3	10563.3	10563.3	10563.3	10563.3	10563.3	10563.3	10563.3	10563.3	10563.3	1.70609e+06
Mif	P34884	Macrophage migration inhibitory factor OS=Mus musculus OX=10090 GN=Mif PE=1 SV=2	919952	1.21944e+06	733174	2.07718e+06	1.46355e+06	826893	1.09491e+06	10563.3	1.25141e+06	1.65423e+06	1.19676e+06	399392	10563.3	10563.3	2.65123e+06	646176	1.06309e+06
Mindy1	Q76LS9	Ubiquitin carboxyl-terminal hydrolase MINDY-1 OS=Mus musculus OX=10090 GN=Mindy1 PE=1 SV=1	10563.3	10563.3	10563.3	364727	10563.3	10563.3	10563.3	10563.3	10563.3	447171	663995	10563.3	10563.3	10563.3	10563.3	10563.3	10563.3
Minpp1	Q9Z2L6	Multiple inositol polyphosphate phosphatase 1 OS=Mus musculus OX=10090 GN=Minpp1 PE=1 SV=3	2.21011e+07	5.2837e+07	2.74182e+07	3.32156e+07	1.80868e+07	2.48013e+07	9.18128e+06	1.01751e+07	1.66484e+07	1.64902e+07	1.51595e+07	1.70588e+07	1.3802e+07	1.22708e+07	1.03032e+07	1.81064e+07	1.226e+07
Mmp19	Q9JHI0	Matrix metalloproteinase-19 OS=Mus musculus OX=10090 GN=Mmp19 PE=2 SV=1	7.90736e+06	8.63441e+06	7.20867e+06	2.65189e+06	4.84648e+06	6.11754e+06	4.45384e+06	4.62081e+06	4.07966e+06	5.0028e+06	3.98026e+06	4.26905e+06	4.21862e+06	5.84595e+06	2.68274e+06	7.20499e+06	5.40662e+06
Mmp2	P33434	72 kDa type IV collagenase OS=Mus musculus OX=10090 GN=Mmp2 PE=1 SV=1	389911	547881	416065	371641	473609	373730	10563.3	227579	740621	10563.3	376724	10563.3	10563.3	10563.3	10563.3	10563.3	10563.3
Mmp8	O70138	Neutrophil collagenase OS=Mus musculus OX=10090 GN=Mmp8 PE=2 SV=2	4.79733e+07	1.44472e+07	1.90717e+07	4.32366e+07	7.43068e+07	2.33996e+07	4.41483e+07	1.04732e+07	8.1186e+07	9.62698e+06	1.04543e+07	2.07545e+07	2.15863e+07	2.04582e+07	1.48788e+07	1.69868e+07	1.79553e+07
Mmrn1	B2RPV6	Multimerin-1 OS=Mus musculus OX=10090 GN=Mmrn1 PE=1 SV=2	9.88676e+07	8.97956e+07	9.82225e+07	5.95507e+07	7.49144e+07	5.94789e+07	3.7932e+07	6.85151e+07	2.78906e+07	4.35906e+07	4.04848e+07	2.12586e+07	3.43611e+07	2.54108e+06	6.91847e+06	4.66049e+07	1.09941e+08
Mmrn2	A6H6E2	Multimerin-2 OS=Mus musculus OX=10090 GN=Mmrn2 PE=1 SV=1	504865	444272	398093	292795	720881	10563.3	10563.3	682246	452198	2.12747e+06	10563.3	10563.3	10563.3	892994	10563.3	10563.3	697620
Mob1b	Q8BPB0	MOB kinase activator 1B OS=Mus musculus OX=10090 GN=Mob1b PE=1 SV=3	476988	885387	1.10053e+06	1.05447e+06	573292	645312	568017	635913	660142	879562	1.47495e+06	10563.3	505332	199309	309235	533543	779080
Mphosph9	A6H5Y1	M-phase phosphoprotein 9 OS=Mus musculus OX=10090 GN=Mphosph9 PE=2 SV=1	10563.3	10563.3	10563.3	10563.3	10563.3	10563.3	10563.3	10563.3	10563.3	10563.3	10563.3	10563.3	695994	10563.3	10563.3	843378	1.82863e+06
Mpig6b	D7PDD4	Megakaryocyte and platelet inhibitory receptor G6b OS=Mus musculus OX=10090 GN=Mpig6b PE=1 SV=1	274862	389542	255925	1.20787e+06	10563.3	835651	1.6023e+06	732473	1.84353e+06	1.0035e+06	1.63387e+06	1.48243e+06	10563.3	10563.3	10563.3	10563.3	10563.3
Mpo	P11247	Myeloperoxidase OS=Mus musculus OX=10090 GN=Mpo PE=1 SV=2	1.45995e+07	2.56385e+07	1.85787e+07	3.87761e+07	1.43537e+07	1.47698e+07	2.1487e+07	1.67133e+07	2.17555e+08	3.74213e+07	2.15187e+07	2.1812e+07	1.96103e+07	1.7559e+07	2.58541e+07	1.76849e+07	1.60738e+07
Mpp1	P70290	55 kDa erythrocyte membrane protein OS=Mus musculus OX=10090 GN=Mpp1 PE=1 SV=1	2.23532e+06	5.64812e+06	5.81201e+06	541291	1.66524e+07	10563.3	242447	10563.3	10563.3	761855	1.54201e+06	10563.3	475905	10563.3	141496	518436	546052
Mpst	Q99J99	3-mercaptopyruvate sulfurtransferase OS=Mus musculus OX=10090 GN=Mpst PE=1 SV=4	10563.3	10563.3	10563.3	113109	10563.3	10563.3	285697	10563.3	10563.3	313785	1.0522e+06	10563.3	10563.3	10563.3	10563.3	10563.3	10563.3
Mri1	Q9CQT1	Methylthioribose-1-phosphate isomerase OS=Mus musculus OX=10090 GN=Mri1 PE=1 SV=1	4.59163e+06	1.0118e+07	7.08727e+06	5.14672e+06	1.29132e+07	2.36778e+06	3.33564e+06	882624	2.83231e+06	4.06588e+06	6.40939e+06	667454	4.94289e+06	4.87032e+06	3.69942e+06	5.47581e+06	5.8416e+06
Msn	P26041	Moesin OS=Mus musculus OX=10090 GN=Msn PE=1 SV=3	1.08734e+07	1.53756e+07	1.67372e+07	1.36006e+07	1.14876e+07	1.42509e+07	6.92156e+06	9.76428e+06	1.13169e+07	1.3353e+07	1.86694e+07	1.08547e+07	1.57763e+06	2.90365e+06	3.5271e+06	3.14155e+06	4.96443e+06
Mst1	P26928	Hepatocyte growth factor-like protein OS=Mus musculus OX=10090 GN=Mst1 PE=2 SV=2	4.63677e+07	4.45193e+07	4.09751e+07	2.74086e+07	2.20106e+07	3.72399e+07	3.61812e+07	1.51336e+07	4.34196e+07	3.62129e+07	3.13153e+07	4.16317e+07	1.54146e+07	2.78153e+07	3.55749e+07	2.33875e+07	1.0215e+07
Mstn	O08689	Growth/differentiation factor 8 OS=Mus musculus OX=10090 GN=Mstn PE=1 SV=1	635846	652509	1.08329e+06	1.27361e+06	803060	1.59454e+06	10563.3	10563.3	10563.3	210506	140463	10563.3	10563.3	10563.3	10563.3	10563.3	10563.3
Mtarc2	Q922Q1	Mitochondrial amidoxime reducing component 2 OS=Mus musculus OX=10090 GN=Mtarc2 PE=1 SV=1	10563.3	10563.3	10563.3	10563.3	10563.3	10563.3	10563.3	10563.3	10563.3	10563.3	10563.3	10563.3	942878	642995	10563.3	1.3718e+06	2.13166e+06
Mtco2	P00405	Cytochrome c oxidase subunit 2 OS=Mus musculus OX=10090 GN=Mtco2 PE=1 SV=1	470752	118990	952409	3.33383e+06	1.27063e+06	582307	1.03409e+06	304271	10563.3	1.61625e+06	567885	460767	10563.3	10563.3	10563.3	10563.3	10563.3
Mterf4	Q8BVN4	Transcription termination factor 4, mitochondrial OS=Mus musculus OX=10090 GN=Mterf4 PE=2 SV=1	285383	210012	330778	471062	483719	281377	10563.3	10563.3	269558	10563.3	268064	358169	10563.3	10563.3	10563.3	10563.3	10563.3
Mthfd1	Q922D8	C-1-tetrahydrofolate synthase, cytoplasmic OS=Mus musculus OX=10090 GN=Mthfd1 PE=1 SV=4	1.08756e+07	2.00461e+07	1.6746e+07	8.13387e+06	3.28422e+07	5.66966e+06	1.35197e+07	2.11702e+07	1.0597e+07	1.53437e+07	1.71011e+07	5.20117e+06	1.60162e+07	2.35179e+07	1.46423e+07	2.01972e+07	1.60897e+07
Mttp	O08601	Microsomal triglyceride transfer protein large subunit OS=Mus musculus OX=10090 GN=Mttp PE=1 SV=2	10563.3	1.30963e+06	10563.3	10563.3	10563.3	10563.3	10563.3	2.69013e+06	10563.3	5.9189e+06	539663	828490	10563.3	10563.3	10563.3	10563.3	10563.3
Mtx1	P47802	Metaxin-1 OS=Mus musculus OX=10090 GN=Mtx1 PE=1 SV=1	10563.3	10563.3	10563.3	10563.3	10563.3	10563.3	10563.3	10563.3	10563.3	10563.3	10563.3	10563.3	10563.3	10563.3	10563.3	10563.3	1.10028e+06
Mug1	P28665	Murinoglobulin-1 OS=Mus musculus OX=10090 GN=Mug1 PE=1 SV=3	1.87508e+10	1.75904e+10	1.36274e+10	1.46152e+10	1.29574e+10	1.40841e+10	4.49081e+09	5.21995e+09	4.97195e+09	2.80728e+09	7.26074e+09	8.34611e+09	3.40508e+09	2.42948e+09	3.69125e+09	3.64592e+09	3.43419e+09
Mug2	P28666	Murinoglobulin-2 OS=Mus musculus OX=10090 GN=Mug2 PE=1 SV=2	5.06814e+07	2.83243e+07	2.57089e+07	2.35283e+07	2.46886e+07	3.05074e+07	7.32284e+06	830044	1.5193e+07	7.92678e+06	1.57613e+07	3.36826e+07	10563.3	10563.3	10563.3	10563.3	10563.3
Mup17	B5X0G2	Major urinary protein 17 OS=Mus musculus OX=10090 GN=Mup17 PE=2 SV=2	2.36358e+08	4.45717e+08	1.59831e+08	2.05908e+08	1.12858e+08	5.64342e+08	2.15449e+07	415323	1.01092e+07	10563.3	5.56001e+07	4.29426e+06	10563.3	10563.3	10563.3	10563.3	10563.3
Mup2	P11589	Major urinary protein 2 OS=Mus musculus OX=10090 GN=Mup2 PE=1 SV=1	9.05694e+08	1.22611e+09	7.31133e+08	9.17431e+08	7.13145e+08	2.17199e+09	7.16982e+07	1.70701e+07	4.4547e+07	3.2603e+06	2.2914e+08	1.73498e+07	8.39597e+07	8.02607e+06	3.33904e+07	2.11001e+07	2.10993e+07
Mup20	Q5FW60	Major urinary protein 20 OS=Mus musculus OX=10090 GN=Mup20 PE=1 SV=1	1.96351e+08	5.91152e+08	5.38164e+08	5.23279e+08	2.29349e+08	7.15927e+08	2.72348e+07	5.55275e+07	3.35567e+07	6.58504e+06	6.80342e+07	8.41876e+06	6.71602e+06	278635	4.32112e+06	2.74166e+06	2.48116e+06
Mup3	P04939	Major urinary protein 3 OS=Mus musculus OX=10090 GN=Mup3 PE=1 SV=1	9.9397e+07	9.47261e+07	1.04421e+08	1.22416e+08	1.30998e+08	6.79926e+07	1.3884e+07	8.8006e+06	9.00267e+06	2.19008e+06	3.22144e+07	3.42207e+06	2.50295e+07	7.33605e+06	1.37674e+07	1.36968e+07	7.06599e+06
Mup4	P11590	Major urinary protein 4 OS=Mus musculus OX=10090 GN=Mup4 PE=1 SV=1	362429	212672	10563.3	284259	10563.3	10563.3	10563.3	10563.3	10563.3	10563.3	10563.3	10563.3	10563.3	10563.3	10563.3	10563.3	10563.3
Mup5	P11591	Major urinary protein 5 OS=Mus musculus OX=10090 GN=Mup5 PE=2 SV=2	436459	10563.3	10563.3	10563.3	254425	10563.3	10563.3	10563.3	10563.3	10563.3	10563.3	10563.3	10563.3	10563.3	10563.3	10563.3	10563.3
Mup6	P02762	Major urinary protein 6 OS=Mus musculus OX=10090 GN=Mup6 PE=1 SV=2	10563.3	10563.3	10563.3	10563.3	10563.3	10563.3	10563.3	10563.3	10563.3	10563.3	10563.3	10563.3	1.65416e+07	702048	2.99887e+06	4.02674e+06	2.47912e+06
Mybpc2	Q5XKE0	Myosin-binding protein C, fast-type OS=Mus musculus OX=10090 GN=Mybpc2 PE=1 SV=1	1.34979e+06	1.11713e+06	2.4497e+06	1.57026e+06	2.60666e+06	5.59341e+06	2.06053e+06	464678	1.37641e+06	10563.3	10563.3	10563.3	10563.3	10563.3	10563.3	10563.3	10563.3
Myh1	Q5SX40	Myosin-1 OS=Mus musculus OX=10090 GN=Myh1 PE=1 SV=1	1.78341e+08	5.28358e+07	1.6077e+08	2.36102e+08	3.54533e+08	4.43728e+08	1.3685e+07	1.71842e+07	6.40116e+06	2.20033e+07	9.59678e+06	5.34097e+06	10563.3	10563.3	10563.3	381020	344002
Myh4	Q5SX39	Myosin-4 OS=Mus musculus OX=10090 GN=Myh4 PE=2 SV=1	3.75771e+07	1.75516e+07	4.23199e+07	5.346e+07	7.94177e+07	1.03705e+08	9.94465e+06	4.73656e+06	4.57242e+06	1.11279e+07	9.73647e+06	2.43163e+06	10563.3	10563.3	10563.3	10563.3	10563.3
Myh6	Q02566	Myosin-6 OS=Mus musculus OX=10090 GN=Myh6 PE=1 SV=2	1.74392e+06	2.59752e+06	1.60187e+06	1.85035e+06	912798	1.42899e+06	761223	1.04437e+06	891188	1.30002e+06	1.58735e+06	910268	10563.3	10563.3	10563.3	10563.3	10563.3
Myh9	Q8VDD5	Myosin-9 OS=Mus musculus OX=10090 GN=Myh9 PE=1 SV=4	4.27482e+08	7.41066e+08	8.17377e+08	7.14785e+08	4.69877e+07	8.11017e+08	6.46787e+08	1.67866e+07	6.38863e+08	7.61277e+08	6.0012e+08	5.69922e+08	4.66358e+07	5.16318e+07	1.72518e+07	4.69127e+07	1.07123e+08
Myl1	P05977	Myosin light chain 1/3, skeletal muscle isoform OS=Mus musculus OX=10090 GN=Myl1 PE=1 SV=2	2.06428e+07	1.39629e+07	2.77039e+07	2.14927e+07	4.16322e+07	2.95917e+07	5.40088e+06	2.5877e+06	1.85055e+06	5.47673e+06	1.13287e+07	1.71389e+06	267639	316858	10563.3	484320	1.09843e+06
Myl12b	Q3THE2	Myosin regulatory light chain 12B OS=Mus musculus OX=10090 GN=Myl12b PE=1 SV=2	2.94094e+06	6.03557e+06	4.98205e+06	6.66726e+06	3.83653e+06	2.91217e+06	2.57992e+06	2.3695e+06	3.0108e+06	4.38528e+06	9.58914e+06	1.18807e+06	2.87064e+06	2.83155e+06	1.79068e+06	4.6239e+06	6.99707e+06
Myl2	P51667	Myosin regulatory light chain 2, ventricular/cardiac muscle isoform OS=Mus musculus OX=10090 GN=Myl2 PE=1 SV=3	10563.3	877796	10563.3	10563.3	333084	218082	10563.3	538814	10563.3	10563.3	280909	176488	10563.3	10563.3	10563.3	10563.3	10563.3
Myl3	P09542	Myosin light chain 3 OS=Mus musculus OX=10090 GN=Myl3 PE=1 SV=4	2.76092e+06	5.15416e+06	434229	2.53879e+06	1.17468e+06	813004	409823	1.25002e+06	1.149e+06	5.0064e+06	6.36493e+06	1.58926e+06	10563.3	10563.3	10563.3	10563.3	10563.3
Myl6	Q60605	Myosin light polypeptide 6 OS=Mus musculus OX=10090 GN=Myl6 PE=1 SV=3	2.0604e+07	4.96341e+07	4.11713e+07	5.36226e+07	3.09578e+07	1.99945e+07	2.4107e+07	2.4654e+07	2.6549e+07	3.29913e+07	7.78537e+07	9.67511e+06	2.39221e+07	1.49243e+07	2.9958e+07	2.56914e+07	3.87075e+07
Myl9	Q9CQ19	Myosin regulatory light polypeptide 9 OS=Mus musculus OX=10090 GN=Myl9 PE=1 SV=3	7.0584e+06	1.89652e+07	1.52369e+07	1.95186e+07	1.08777e+07	7.8817e+06	5.64509e+06	5.32471e+06	7.76432e+06	1.04592e+07	3.16769e+07	4.24725e+06	1.07837e+07	9.21881e+06	3.87534e+06	1.60251e+07	2.47583e+07
Mylk	Q6PDN3	Myosin light chain kinase, smooth muscle OS=Mus musculus OX=10090 GN=Mylk PE=1 SV=3	1.03894e+06	1.81535e+06	1.1779e+06	1.07856e+06	1.0282e+06	10563.3	651604	10563.3	10563.3	10563.3	1.6747e+06	10563.3	1.15631e+06	10563.3	1.03031e+06	2.37237e+06	3.96381e+06
Mylk3	Q3UIZ8	Myosin light chain kinase 3 OS=Mus musculus OX=10090 GN=Mylk3 PE=1 SV=1	10563.3	10563.3	10563.3	10563.3	10563.3	10563.3	10563.3	10563.3	10563.3	10563.3	10563.3	10563.3	278798	10563.3	327789	409880	1.30974e+06
Mylpf	P97457	Myosin regulatory light chain 2, skeletal muscle isoform OS=Mus musculus OX=10090 GN=Mylpf PE=1 SV=3	7.8516e+06	3.85537e+06	1.5065e+07	9.92683e+06	1.87117e+07	1.33557e+07	1.69344e+06	2.06194e+06	10563.3	837464	1.76166e+06	458235	10563.3	10563.3	10563.3	10563.3	10563.3
Myo1h	Q9D6A1	Unconventional myosin-Ih OS=Mus musculus OX=10090 GN=Myo1h PE=2 SV=2	9.69724e+06	1.02213e+07	5.11691e+06	2.65619e+06	6.5838e+06	7.08193e+06	1.12215e+07	10563.3	2.46659e+07	9.93962e+06	5.82838e+06	1.24797e+07	10563.3	10563.3	10563.3	10563.3	10563.3
Mzb1	Q9D8I1	Marginal zone B- and B1-cell-specific protein OS=Mus musculus OX=10090 GN=Mzb1 PE=1 SV=2	10563.3	640256	1.61064e+06	444079	10563.3	497928	636189	521594	1.07869e+06	2.52075e+06	434865	10563.3	10563.3	10563.3	10563.3	10563.3	10563.3
	P01626	Ig kappa chain V-II region MOPC 167 OS=Mus musculus OX=10090 PE=1 SV=1	10563.3	545163	10563.3	429652	10563.3	514460	148957	10563.3	413699	1.68348e+06	567034	577602	10563.3	10563.3	10563.3	10563.3	10563.3
	P01628	Ig kappa chain V-II region MOPC 511 OS=Mus musculus OX=10090 PE=1 SV=1	1.10913e+06	2.14129e+06	1.79598e+06	495893	2.56468e+06	782427	3.13709e+06	4.18695e+06	5.59225e+06	3.21872e+06	1.4444e+06	2.20863e+06	3.93759e+06	6.59091e+06	9.19388e+06	6.97213e+06	1.10214e+07
	P01629	Ig kappa chain V-II region 2S1.3 OS=Mus musculus OX=10090 PE=1 SV=1	3.35005e+06	1.29582e+07	1.0154e+07	5.97268e+06	1.00225e+07	4.31104e+06	2.12863e+07	1.51712e+07	8.28439e+06	3.0508e+07	3.83458e+06	1.21334e+07	1.64213e+07	7.45765e+07	1.40106e+07	1.0174e+07	2.74744e+07
	P01630	Ig kappa chain V-II region 7S34.1 OS=Mus musculus OX=10090 PE=1 SV=1	2.32104e+07	1.0765e+08	1.201e+07	1.71839e+07	1.00855e+08	1.64971e+07	4.85188e+07	4.50241e+07	1.74981e+08	1.17457e+08	3.04742e+07	4.76736e+07	4.18985e+07	2.09611e+08	1.82854e+08	3.95328e+07	8.19648e+07
	P01631	Ig kappa chain V-II region 26-10 OS=Mus musculus OX=10090 PE=1 SV=1	7.87975e+08	1.05673e+09	8.20738e+08	5.86968e+08	1.07865e+09	8.4797e+08	7.34472e+08	1.36402e+09	1.92071e+09	2.38047e+09	7.95786e+08	1.27157e+09	8.1462e+08	1.94188e+09	2.08633e+09	9.5472e+08	1.49249e+09
	P01634	Ig kappa chain V-V region MOPC 21 OS=Mus musculus OX=10090 PE=1 SV=1	9.23344e+06	7.1713e+06	5.21834e+06	3.17811e+06	2.70033e+07	2.99154e+06	2.77142e+07	2.72902e+07	5.29217e+07	2.2407e+07	5.65882e+06	1.1247e+07	5.29428e+07	1.37249e+08	2.43923e+08	3.12168e+07	1.05286e+08
	P01635	Ig kappa chain V-V region K2 (Fragment) OS=Mus musculus OX=10090 PE=1 SV=1	5.865e+07	1.33087e+08	4.15663e+07	5.42881e+07	8.04015e+07	4.30046e+07	1.72963e+08	1.69895e+08	3.15107e+08	2.68587e+08	6.06694e+07	9.43914e+07	1.41957e+08	2.25248e+08	6.73098e+08	1.23294e+08	1.22705e+08
	P01636	Ig kappa chain V-V region MOPC 149 OS=Mus musculus OX=10090 PE=1 SV=1	2.27593e+07	3.54333e+07	1.38912e+07	1.26878e+07	1.98993e+07	1.80951e+07	6.398e+07	9.50168e+07	1.03231e+08	1.10823e+08	1.57056e+07	3.57544e+07	5.94022e+07	1.31381e+08	1.46286e+08	4.42369e+07	5.19208e+07
	P01637	Ig kappa chain V-V region T1 OS=Mus musculus OX=10090 PE=4 SV=1	4.43198e+07	2.11636e+07	1.61134e+07	1.16329e+07	2.98515e+07	1.64731e+07	5.01381e+07	3.17072e+07	1.92915e+08	5.6333e+07	1.62414e+07	2.33216e+07	10563.3	10563.3	10563.3	10563.3	10563.3
	P01638	Ig kappa chain V-V region L6 (Fragment) OS=Mus musculus OX=10090 PE=4 SV=1	3.94396e+07	1.12201e+07	6.02979e+06	5.3869e+06	1.42316e+07	5.8791e+06	3.13364e+07	1.80227e+07	1.44004e+08	2.37094e+07	6.26649e+06	10563.3	1.1029e+08	9.76187e+07	2.87239e+08	4.24427e+07	1.07377e+08
	P01643	Ig kappa chain V-V region MOPC 173 OS=Mus musculus OX=10090 PE=1 SV=1	3.69613e+06	8.15955e+06	2.04284e+07	937124	6.08234e+06	1.62414e+06	5.23281e+06	8.03457e+06	1.65621e+07	3.01084e+07	680317	6.39356e+06	1.75219e+06	7.00908e+06	9.58381e+06	3.0877e+06	4.01228e+06
	P01646	Ig kappa chain V-V region HP 123E6 OS=Mus musculus OX=10090 PE=1 SV=1	2.5326e+08	2.21887e+08	1.61541e+08	8.49782e+07	4.37022e+08	1.27387e+08	3.70864e+08	2.55998e+08	6.2338e+08	7.40543e+08	1.33969e+08	2.03864e+08	6.93056e+07	2.78051e+08	3.66284e+08	7.89473e+07	1.09223e+08
	P01647	Ig kappa chain V-V region HP 124E1 OS=Mus musculus OX=10090 PE=1 SV=1	7.19444e+07	1.71002e+07	3.72752e+07	3.40553e+07	5.55019e+07	2.0511e+07	1.94496e+07	3.38333e+07	6.00739e+07	7.39036e+07	1.40603e+07	2.76868e+07	6.58766e+07	1.65001e+08	1.52181e+08	5.88276e+07	6.75595e+07
	P01648	Ig kappa chain V-V region HP 91A3 OS=Mus musculus OX=10090 PE=1 SV=1	2.12979e+07	2.20815e+07	1.27728e+07	9.29237e+06	1.93686e+07	1.21347e+07	2.18176e+07	3.02906e+07	4.98493e+07	1.00253e+08	1.35092e+07	3.05656e+07	3.86105e+07	4.55426e+08	8.97125e+07	3.48803e+07	5.795e+07
	P01652	Ig kappa chain V-V region J606 OS=Mus musculus OX=10090 PE=1 SV=1	722591	10563.3	412770	476097	878622	1.41797e+06	307879	10563.3	4.77637e+06	9.29897e+06	10563.3	3.85638e+06	4.32932e+06	3.45962e+06	2.28461e+06	673047	1.40156e+06
	P01654	Ig kappa chain V-III region PC 2880/PC 1229 OS=Mus musculus OX=10090 PE=1 SV=1	9.44449e+07	7.04004e+07	2.11128e+07	1.77537e+07	1.78627e+07	9.81487e+06	5.04951e+07	3.29761e+07	1.06593e+08	1.14506e+08	7.63449e+06	1.96414e+07	4.78404e+08	3.33018e+08	1.30334e+09	3.20761e+08	2.36785e+08
	P01660	Ig kappa chain V-III region PC 3741/TEPC 111 OS=Mus musculus OX=10090 PE=1 SV=1	1.42724e+08	6.62636e+07	3.51219e+07	3.56478e+07	7.45596e+07	3.02718e+07	1.23823e+08	3.71472e+07	2.48179e+08	2.75535e+08	2.51102e+07	8.82492e+07	1.26849e+08	7.52495e+07	3.75491e+08	1.44054e+08	3.45677e+07
	P01663	Ig kappa chain V-III region PC 4050 OS=Mus musculus OX=10090 PE=1 SV=1	6.19362e+07	4.21247e+07	1.87695e+07	2.77157e+07	3.23875e+07	1.3207e+07	5.40427e+07	3.03558e+07	1.02127e+08	4.14072e+07	1.19522e+07	3.12807e+07	2.48427e+07	3.95278e+07	1.21135e+08	2.99203e+07	2.84428e+07
	P01665	Ig kappa chain V-III region PC 7043 OS=Mus musculus OX=10090 PE=1 SV=1	10563.3	10563.3	10563.3	10563.3	10563.3	10563.3	10563.3	10563.3	10563.3	10563.3	10563.3	10563.3	1.79881e+08	1.67668e+08	3.83706e+08	9.73857e+07	6.54341e+07
	P01667	Ig kappa chain V-III region PC 6308 OS=Mus musculus OX=10090 PE=1 SV=1	2.89863e+07	1.78877e+07	3.34186e+06	3.44402e+06	2.67704e+07	1.83969e+06	1.74677e+07	1.15607e+07	1.30081e+07	5.96926e+06	745582	1.92699e+07	5.93295e+06	580283	6.83528e+06	6.7507e+06	619301
	P01668	Ig kappa chain V-III region PC 7210 OS=Mus musculus OX=10090 PE=1 SV=1	1.71302e+08	1.23256e+08	1.20689e+07	2.87481e+07	5.27739e+07	1.41267e+07	8.83356e+07	6.18899e+07	1.3876e+08	5.74593e+07	9.56604e+06	1.1807e+08	10563.3	10563.3	10563.3	10563.3	10563.3
	P01669	Ig kappa chain V-III region PC 7769 OS=Mus musculus OX=10090 PE=1 SV=1	10563.3	10563.3	10563.3	10563.3	2.21555e+06	10563.3	10563.3	10563.3	4.3632e+06	3.43047e+07	10563.3	10563.3	10563.3	10563.3	10563.3	10563.3	10563.3
	P01671	Ig kappa chain V-III region PC 7175 OS=Mus musculus OX=10090 PE=1 SV=1	5.31266e+08	3.78162e+08	1.19959e+08	1.91852e+08	3.37706e+08	9.65169e+07	7.23503e+08	2.48873e+08	7.63277e+08	6.55885e+08	6.72441e+07	4.0463e+08	6.90635e+07	9.37652e+07	2.07916e+08	2.27595e+07	4.30422e+07
	P01672	Ig kappa chain V-III region PC 7940 OS=Mus musculus OX=10090 PE=1 SV=1	181315	10563.3	254207	1.12583e+06	10563.3	10563.3	1.40327e+06	10563.3	2.19122e+06	10563.3	10563.3	910564	10563.3	10563.3	10563.3	10563.3	10563.3
	P01673	Ig kappa chain V-III region PC 2485/PC 4039 OS=Mus musculus OX=10090 PE=1 SV=1	10563.3	10563.3	10563.3	10563.3	10563.3	10563.3	10563.3	10563.3	10563.3	1.23432e+06	10563.3	10563.3	10563.3	10563.3	10563.3	10563.3	10563.3
	P01674	Ig kappa chain V-III region PC 2154 OS=Mus musculus OX=10090 PE=1 SV=1	1.30619e+07	6.90573e+06	3.10681e+06	5.16665e+06	3.10351e+07	1.5909e+07	2.23855e+07	2.39894e+07	7.37497e+07	3.74973e+07	5.9688e+06	3.09304e+07	2.8567e+07	7.58837e+07	9.1685e+07	2.43599e+07	1.89175e+07
	P01679	Ig kappa chain V-VI region J539 OS=Mus musculus OX=10090 PE=1 SV=1	6.68746e+06	1.97856e+07	1.48022e+07	9.56048e+06	2.32843e+07	1.92891e+07	1.07345e+07	1.50687e+07	2.8528e+07	7.22631e+07	9.51546e+06	1.05139e+07	2.15214e+07	2.11811e+07	5.68146e+07	3.97248e+07	3.3976e+07
	P01680	Ig kappa chain V-IV region S107B OS=Mus musculus OX=10090 PE=4 SV=1	3.53218e+07	8.47762e+06	1.43142e+07	2.10507e+07	2.61316e+07	2.17208e+07	9.25895e+07	4.67871e+07	1.14682e+08	2.16013e+08	2.6329e+07	4.64997e+07	2.66967e+07	9.71729e+07	4.06659e+08	4.50302e+07	1.26752e+08
	P01723	Ig lambda-1 chain V region OS=Mus musculus OX=10090 PE=1 SV=2	2.25815e+08	3.04541e+08	2.50687e+08	1.48305e+08	2.34958e+08	2.72621e+08	2.68381e+08	4.17004e+08	7.77883e+08	1.02129e+09	2.6204e+08	4.54044e+08	7.41163e+08	1.05382e+09	9.72421e+08	5.54381e+08	4.15397e+08
	P01725	Ig lambda-1 chain V region S178 OS=Mus musculus OX=10090 PE=1 SV=1	3.86052e+06	7.56902e+06	6.10256e+06	3.38611e+06	4.82866e+06	8.26598e+06	5.17689e+06	415332	1.66854e+07	2.54144e+07	4.78288e+06	9.89055e+06	10563.3	2.37172e+06	2.07584e+06	557654	10563.3
	P01728	Ig lambda-2 chain V region OS=Mus musculus OX=10090 PE=3 SV=1	1.37555e+06	3.31641e+06	691542	10563.3	10563.3	2.57682e+06	792342	9.60115e+06	3.99718e+06	10563.3	10563.3	591096	10563.3	4.28774e+06	10563.3	10563.3	10563.3
	P01741	Ig heavy chain V region OS=Mus musculus OX=10090 PE=1 SV=1	3.98611e+06	4.54654e+06	2.53165e+06	2.67748e+06	4.54332e+06	1.90076e+06	1.68764e+07	10563.3	2.279e+07	4.04784e+07	2.0559e+06	1.08416e+07	1.48108e+06	2.05827e+07	1.27404e+07	10563.3	1.44746e+06
	P01745	Ig heavy chain V region MPC 11 OS=Mus musculus OX=10090 PE=4 SV=1	10563.3	10563.3	10563.3	10563.3	10563.3	10563.3	10563.3	10563.3	10563.3	10563.3	10563.3	10563.3	10563.3	1.2108e+06	2.26086e+06	10563.3	1.51349e+06
	P01746	Ig heavy chain V region 93G7 OS=Mus musculus OX=10090 PE=2 SV=1	10563.3	10563.3	10563.3	10563.3	10563.3	10563.3	10563.3	10563.3	10563.3	10563.3	10563.3	10563.3	3.99017e+06	1.29942e+07	1.17835e+07	5.84364e+06	6.52069e+06
	P01747	Ig heavy chain V region 36-65 OS=Mus musculus OX=10090 PE=1 SV=1	2.64992e+07	4.23163e+07	2.28926e+07	2.11429e+07	3.59691e+07	2.08114e+07	4.86669e+07	5.88414e+06	9.60288e+07	5.53195e+07	2.35804e+07	4.65751e+07	10563.3	10563.3	10563.3	10563.3	10563.3
	P01748	Ig heavy chain V region 23 OS=Mus musculus OX=10090 PE=4 SV=1	10563.3	752683	10563.3	6.52448e+06	1.33195e+06	3.80479e+06	10563.3	10563.3	5.34519e+06	10563.3	10563.3	10563.3	10563.3	8.73828e+06	3.63989e+06	3.38162e+06	2.16869e+06
	P01750	Ig heavy chain V region 102 OS=Mus musculus OX=10090 PE=1 SV=1	8.0516e+07	4.8072e+07	2.92563e+07	1.98598e+07	2.90845e+07	1.84311e+07	4.76397e+07	5.33693e+07	5.57883e+07	6.43798e+07	6.67671e+06	4.0705e+07	4.19372e+07	6.62207e+07	1.09122e+08	1.96739e+07	4.66127e+07
	P01759	Ig heavy chain V region BCL1 OS=Mus musculus OX=10090 PE=4 SV=1	1.8299e+06	1.94727e+06	5.27386e+06	1.69948e+06	563690	2.81688e+06	3.45144e+06	819736	4.58382e+06	9.71716e+06	3.1145e+06	4.63196e+07	1.09128e+06	2.16122e+06	3.09563e+06	1.79111e+06	7.61023e+06
	P01786	Ig heavy chain V region MOPC 47A OS=Mus musculus OX=10090 PE=1 SV=1	2.14815e+08	1.00218e+08	7.42863e+07	3.93099e+07	3.40777e+07	6.01135e+07	7.76895e+07	5.47885e+07	2.02994e+08	1.18758e+08	3.55166e+07	1.26592e+08	5.13832e+07	8.50267e+07	1.96621e+08	1.11046e+08	1.20439e+08
	P01791	Ig heavy chain V region HPCM6 OS=Mus musculus OX=10090 PE=1 SV=1	3.19009e+07	3.04231e+07	3.67285e+07	1.10626e+07	1.82814e+07	1.8159e+08	2.09771e+07	3.28768e+07	1.16024e+08	6.62273e+07	3.99349e+07	5.10782e+07	3.37952e+07	3.5969e+07	1.61395e+08	3.74662e+07	6.94583e+07
	P01795	Ig heavy chain V region M167 OS=Mus musculus OX=10090 PE=1 SV=1	10563.3	10563.3	10563.3	10563.3	10563.3	10563.3	10563.3	497451	1.20076e+06	1.027e+07	10563.3	822708	10563.3	10563.3	10563.3	10563.3	10563.3
	P01798	Ig heavy chain V-III region E109 OS=Mus musculus OX=10090 PE=1 SV=1	361311	1.27401e+06	1.72057e+06	1.08539e+06	253991	10563.3	342846	1.31684e+07	6.59701e+06	10563.3	10563.3	1.13822e+06	1.82748e+08	2.52132e+08	2.84026e+08	7.59368e+07	1.17615e+08
	P01800	Ig heavy chain V-III region T957 OS=Mus musculus OX=10090 PE=1 SV=2	10563.3	10563.3	10563.3	402255	10563.3	10563.3	2.50055e+06	10563.3	10563.3	499799	10563.3	10563.3	10563.3	10563.3	10563.3	10563.3	10563.3
	P01801	Ig heavy chain V-III region J606 OS=Mus musculus OX=10090 PE=1 SV=1	1.23709e+08	2.17216e+08	1.15713e+08	9.62457e+07	2.17483e+08	1.2308e+08	1.30681e+08	1.42498e+08	2.50514e+08	5.02559e+08	8.19801e+07	2.50287e+08	10563.3	10563.3	10563.3	10563.3	10563.3
	P01803	Ig heavy chain V region AMPC1 OS=Mus musculus OX=10090 PE=1 SV=1	10563.3	10563.3	10563.3	10563.3	411100	10563.3	2.26747e+06	10563.3	696214	4.65289e+06	10563.3	625424	1.27174e+08	1.71014e+08	2.32075e+08	8.19552e+07	9.18035e+07
	P01807	Ig heavy chain V region X44 OS=Mus musculus OX=10090 PE=1 SV=1	6.95775e+07	5.2209e+07	6.53973e+07	2.69096e+07	8.57369e+07	5.74772e+07	4.96697e+07	2.53457e+07	1.15285e+08	1.09497e+08	3.44614e+07	5.77965e+07	1.07124e+06	7.12116e+06	2.12594e+06	1.75435e+06	2.97651e+06
	P01811	Ig heavy chain V region UPC10 OS=Mus musculus OX=10090 PE=1 SV=1	10563.3	1.23765e+06	10563.3	10563.3	10563.3	10563.3	10563.3	10563.3	2.82746e+06	748480	10563.3	10563.3	1.12082e+06	2.51906e+06	10563.3	1.14079e+06	10563.3
	P01819	Ig heavy chain V region MOPC 141 OS=Mus musculus OX=10090 PE=4 SV=1	3.31851e+07	5.47287e+07	2.10959e+07	9.82378e+06	4.05904e+07	2.76751e+07	3.39003e+07	8.38179e+07	9.85619e+07	7.21837e+07	2.87946e+07	8.56158e+07	9.41571e+07	1.13665e+08	1.91804e+08	7.67992e+07	3.05362e+07
	P01822	Ig heavy chain V region MOPC 315 OS=Mus musculus OX=10090 PE=1 SV=2	10563.3	10563.3	343537	2.3027e+06	675559	10563.3	1.03402e+06	1.32299e+06	3.5538e+06	2.28084e+06	10563.3	439121	10563.3	10563.3	10563.3	10563.3	10563.3
	P01843	Ig lambda-1 chain C region OS=Mus musculus OX=10090 PE=1 SV=1	2.24044e+08	3.3283e+08	2.96268e+08	1.78193e+08	2.40948e+08	3.84722e+08	3.31358e+08	5.88501e+08	7.17473e+08	1.1996e+09	2.84792e+08	3.85939e+08	6.20394e+08	8.33711e+08	5.7793e+08	3.12561e+08	1.94488e+08
	P01864	Ig gamma-2A chain C region secreted form OS=Mus musculus OX=10090 PE=1 SV=1	1.80787e+09	1.56566e+09	2.74937e+08	4.14581e+08	1.07127e+09	2.37747e+08	2.24562e+09	2.40646e+09	2.63887e+09	1.84798e+09	5.98869e+08	1.85616e+09	2.13042e+09	2.63768e+09	3.3943e+09	1.31842e+09	3.61776e+08
	P01878	Ig alpha chain C region OS=Mus musculus OX=10090 PE=1 SV=1	9.37727e+08	5.83409e+08	1.72494e+09	1.73599e+09	2.22278e+09	2.10374e+09	5.47708e+08	2.16523e+09	1.50813e+09	6.98862e+09	1.41409e+09	1.37925e+09	7.86125e+08	8.23536e+09	5.08173e+08	1.03418e+09	4.1082e+09
	P01882	Ig delta chain C region membrane-bound form OS=Mus musculus OX=10090 PE=1 SV=3	10563.3	10563.3	10563.3	10563.3	10563.3	10563.3	10563.3	10563.3	10563.3	10563.3	10563.3	10563.3	10563.3	10563.3	10563.3	10563.3	10563.3
	P03976	Ig kappa chain V-II region 17S29.1 OS=Mus musculus OX=10090 PE=1 SV=1	2.52618e+07	3.85966e+07	2.47683e+07	3.45443e+07	6.58664e+07	1.66356e+07	3.3635e+07	4.2545e+07	4.915e+07	4.71094e+07	1.90572e+07	1.54442e+07	2.91698e+07	1.31755e+08	8.14306e+07	5.18825e+07	7.47696e+07
	P03977	Ig kappa chain V-III region 50S10.1 OS=Mus musculus OX=10090 PE=1 SV=1	4.62294e+08	4.17235e+08	4.24878e+08	4.4474e+08	4.29731e+08	5.34125e+08	3.80162e+08	9.57349e+08	6.54161e+08	6.41089e+08	6.14585e+08	6.45942e+08	10563.3	10563.3	3.83667e+07	10563.3	10563.3
	P03980	Ig heavy chain V region TEPC 1017 OS=Mus musculus OX=10090 PE=4 SV=1	10563.3	10563.3	10563.3	10563.3	10563.3	10563.3	10563.3	10563.3	10563.3	10563.3	10563.3	10563.3	10563.3	2.32614e+06	10563.3	10563.3	10563.3
	P03987	Ig gamma-3 chain C region OS=Mus musculus OX=10090 PE=1 SV=2	6.91531e+08	6.4619e+08	6.91683e+08	2.8536e+08	4.22394e+08	5.35452e+08	2.76989e+09	6.08462e+08	3.65848e+09	1.01143e+09	3.64092e+08	3.76844e+08	2.78626e+09	6.03145e+08	7.26774e+09	3.89608e+09	2.28145e+09
	P04940	Ig kappa chain V-VI region NQ2-17.4.1 OS=Mus musculus OX=10090 PE=2 SV=1	2.92335e+08	1.44216e+08	1.77851e+08	1.16793e+08	1.82574e+08	1.18043e+08	4.6115e+08	1.9406e+08	2.74482e+08	8.51035e+08	1.71032e+08	5.75496e+08	3.47747e+08	6.44489e+08	1.23812e+09	4.14696e+08	2.74025e+08
	P04945	Ig kappa chain V-VI region NQ2-6.1 OS=Mus musculus OX=10090 PE=2 SV=1	2.8468e+07	4.93065e+08	1.41315e+07	1.08047e+07	3.87016e+07	2.34793e+07	1.70896e+07	2.63807e+07	4.59515e+07	7.87632e+07	1.84514e+07	1.04232e+07	3.01228e+07	2.34437e+07	7.61578e+07	1.69804e+07	1.87308e+07
	P04946	Ig kappa chain V-V region NQ5-89.4 OS=Mus musculus OX=10090 PE=2 SV=1	10563.3	10563.3	10563.3	10563.3	10563.3	10563.3	10563.3	10563.3	10563.3	10563.3	10563.3	10563.3	10563.3	793692	10563.3	10563.3	10563.3
	P06329	Ig heavy chain V region AC38 15.3 OS=Mus musculus OX=10090 PE=1 SV=1	10563.3	10563.3	10563.3	10563.3	10563.3	10563.3	10563.3	5.37972e+06	10563.3	10563.3	10563.3	10563.3	10563.3	10563.3	10563.3	10563.3	10563.3
	P06330	Ig heavy chain V region AC38 205.12 OS=Mus musculus OX=10090 PE=1 SV=1	9.37529e+08	9.50625e+08	5.00526e+08	5.11248e+08	8.32167e+08	5.15639e+08	1.20739e+09	9.03623e+08	1.79713e+09	1.79962e+09	4.65429e+08	1.08873e+09	9.386e+08	1.90441e+09	2.87491e+09	9.13974e+08	9.47984e+08
	P06336	Ig epsilon chain C region OS=Mus musculus OX=10090 PE=4 SV=2	1.49597e+06	330358	325341	1.11271e+06	994849	599698	3.03329e+07	3.1927e+06	2.2815e+07	5.488e+06	589865	4.74804e+06	10563.3	10563.3	1.42254e+07	524576	1.2177e+06
	P10404	MLV-related proviral Env polyprotein OS=Mus musculus OX=10090 PE=1 SV=3	5.24252e+06	3.78276e+06	1.76944e+06	2.88224e+06	4.0079e+06	4.24961e+06	589883	583859	1.75652e+06	3.46509e+06	577221	955738	404924	801886	867876	359746	222600
	P18524	Ig heavy chain V region RF OS=Mus musculus OX=10090 PE=1 SV=1	1.68758e+07	2.85157e+07	1.75708e+07	1.60838e+07	2.07001e+07	3.35161e+07	2.92715e+07	9.3175e+07	1.48956e+08	7.71798e+07	1.84405e+07	4.33249e+07	5.34e+07	1.36432e+08	1.11757e+08	2.21509e+07	4.2179e+07
	P18525	Ig heavy chain V region 5-84 OS=Mus musculus OX=10090 PE=1 SV=1	3.23767e+07	2.56707e+07	2.67409e+07	3.17656e+07	4.86818e+07	3.26612e+07	8.28983e+07	1.90456e+07	2.22958e+08	1.56197e+08	2.81453e+07	7.38274e+07	4.05656e+07	1.35766e+08	1.0532e+08	6.36948e+07	2.34018e+07
	P18527	Ig heavy chain V region 914 OS=Mus musculus OX=10090 PE=1 SV=1	10563.3	10563.3	490128	116626	241570	428091	134843	444064	787340	1.04031e+07	408699	511203	1.71365e+07	5.62379e+07	4.04375e+07	8.69862e+06	2.04605e+07
	P18528	Ig heavy chain V region 6.96 OS=Mus musculus OX=10090 PE=4 SV=1	2.98194e+07	4.80202e+07	4.2771e+07	4.42824e+07	3.96778e+07	2.50881e+07	5.24913e+07	6.89572e+07	2.22653e+08	2.02578e+08	2.33593e+07	7.88132e+07	6.33168e+07	2.9258e+08	1.50587e+08	6.02893e+07	6.00491e+07
	P18529	Ig heavy chain V region 5-76 OS=Mus musculus OX=10090 PE=1 SV=1	10563.3	10563.3	10563.3	290729	1.09013e+06	4.22473e+06	249120	325083	329923	821300	117841	4.69181e+06	10563.3	10563.3	10563.3	10563.3	10563.3
	P84750	Ig kappa chain V region Mem5 (Fragment) OS=Mus musculus OX=10090 PE=1 SV=1	5.56951e+07	1.54142e+07	2.61134e+07	2.06422e+07	3.68247e+07	3.28995e+07	6.19642e+07	8.54483e+07	1.4267e+08	2.45207e+08	2.08362e+07	3.85388e+07	1.82384e+08	1.58851e+08	2.36043e+08	1.20379e+08	1.29131e+08
	Q99KU6	Bombesin receptor-activated protein C6orf89 homolog OS=Mus musculus OX=10090 PE=2 SV=2	10563.3	10563.3	10563.3	10563.3	10563.3	10563.3	10563.3	10563.3	10563.3	10563.3	10563.3	10563.3	411910	349361	10563.3	376354	734167
Nadsyn1	Q711T7	Glutamine-dependent NAD(+) synthetase OS=Mus musculus OX=10090 GN=Nadsyn1 PE=1 SV=1	10563.3	10563.3	10563.3	10563.3	10563.3	10563.3	10563.3	10563.3	10563.3	10563.3	10563.3	10563.3	496764	419988	10563.3	461619	645850
Naga	Q9QWR8	Alpha-N-acetylgalactosaminidase OS=Mus musculus OX=10090 GN=Naga PE=1 SV=2	2.16563e+06	2.7993e+06	476625	10563.3	379422	1.69935e+06	4.25734e+06	7.74455e+06	1.50761e+06	6.17897e+06	1.5068e+06	1.26557e+07	10563.3	10563.3	10563.3	10563.3	10563.3
Nap1l1	P28656	Nucleosome assembly protein 1-like 1 OS=Mus musculus OX=10090 GN=Nap1l1 PE=1 SV=2	805648	2.67018e+06	3.97758e+06	1.17687e+06	6.42511e+06	3.89228e+06	4.12876e+06	10563.3	3.37017e+06	1.00038e+06	2.46594e+06	2.27156e+06	10563.3	10563.3	10563.3	10563.3	910547
Nap1l4	Q78ZA7	Nucleosome assembly protein 1-like 4 OS=Mus musculus OX=10090 GN=Nap1l4 PE=1 SV=1	10563.3	535815	523186	202890	495158	203652	427862	10563.3	10563.3	10563.3	10563.3	173680	10563.3	10563.3	10563.3	10563.3	10563.3
Napa	Q9DB05	Alpha-soluble NSF attachment protein OS=Mus musculus OX=10090 GN=Napa PE=1 SV=1	10563.3	473377	569200	844139	1.02334e+06	10563.3	964235	10563.3	262370	973389	324083	10563.3	10563.3	10563.3	10563.3	10563.3	10563.3
Napb	P28663	Beta-soluble NSF attachment protein OS=Mus musculus OX=10090 GN=Napb PE=1 SV=2	10563.3	10563.3	10563.3	343465	10563.3	10563.3	10563.3	10563.3	10563.3	10563.3	10563.3	10563.3	10563.3	10563.3	10563.3	10563.3	10563.3
Naprt	Q8CC86	Nicotinate phosphoribosyltransferase OS=Mus musculus OX=10090 GN=Naprt PE=1 SV=1	1.17336e+06	927182	900851	967405	1.53927e+06	350752	341402	1.27162e+06	10563.3	2.0609e+06	1.53249e+06	10563.3	3.39709e+06	2.50926e+06	10563.3	4.03944e+06	5.80138e+06
Napsa	O09043	Napsin-A OS=Mus musculus OX=10090 GN=Napsa PE=1 SV=1	2.42415e+07	2.13126e+07	1.70148e+07	2.37175e+07	3.36175e+07	2.3589e+07	1.60068e+07	5.12637e+06	1.45299e+07	1.37469e+07	1.17558e+07	7.21703e+06	1.08809e+07	8.99488e+06	8.90866e+06	1.16995e+07	1.00023e+07
NARS1	Q8BP47	Asparagine--tRNA ligase, cytoplasmic OS=Mus musculus OX=10090 GN=NARS1 PE=1 SV=2	924414	1.47318e+06	1.19611e+06	1.53249e+06	2.25829e+06	579615	1.84048e+06	392984	1.44007e+06	953652	2.10614e+06	303577	10563.3	10563.3	10563.3	10563.3	10563.3
Nat2	P50295	Arylamine N-acetyltransferase 2 OS=Mus musculus OX=10090 GN=Nat2 PE=1 SV=1	10563.3	10563.3	10563.3	10563.3	361913	10563.3	10563.3	10563.3	10563.3	10563.3	10563.3	10563.3	10563.3	10563.3	10563.3	10563.3	10563.3
Nbeal2	Q6ZQA0	Neurobeachin-like protein 2 OS=Mus musculus OX=10090 GN=Nbeal2 PE=1 SV=2	10563.3	2.85483e+06	1.10024e+06	624458	10563.3	955366	2.54331e+06	384239	1.36079e+06	2.20748e+06	1.154e+06	10563.3	10563.3	10563.3	10563.3	10563.3	10563.3
Nbl1	Q61477	Neuroblastoma suppressor of tumorigenicity 1 OS=Mus musculus OX=10090 GN=Nbl1 PE=1 SV=2	321761	403491	756159	596427	10563.3	650608	634848	10563.3	483747	10563.3	765902	10563.3	1.18507e+06	10563.3	1.92306e+06	1.01507e+06	1.20973e+06
Ncam1	P13595	Neural cell adhesion molecule 1 OS=Mus musculus OX=10090 GN=Ncam1 PE=1 SV=3	5.00298e+07	5.33589e+07	6.02006e+07	6.33246e+07	5.95924e+07	6.42415e+07	1.58569e+07	1.84177e+08	1.09018e+07	4.61937e+07	3.63677e+07	3.18321e+07	4.17949e+07	4.92334e+07	2.66247e+07	3.35009e+07	3.1127e+07
Ndrg2	Q9QYG0	Protein NDRG2 OS=Mus musculus OX=10090 GN=Ndrg2 PE=1 SV=1	10563.3	780775	346099	1.87651e+06	2.00643e+06	2.52423e+06	2.37878e+06	3.22603e+06	1.26573e+06	2.29704e+06	250533	10563.3	5.72877e+06	1.2946e+06	4.16055e+06	4.5906e+06	1.25592e+07
Ndufa10	Q99LC3	NADH dehydrogenase [ubiquinone] 1 alpha subcomplex subunit 10, mitochondrial OS=Mus musculus OX=10090 GN=Ndufa10 PE=1 SV=1	1.252e+06	1.67711e+06	2.50114e+06	2.65658e+06	1.96126e+06	1.98365e+06	1.54609e+06	1.34813e+06	3.06816e+06	1.80872e+06	2.05446e+06	982783	10563.3	10563.3	10563.3	10563.3	10563.3
Ndufa4	Q62425	Cytochrome c oxidase subunit NDUFA4 OS=Mus musculus OX=10090 GN=Ndufa4 PE=1 SV=2	10563.3	10563.3	10563.3	1.7158e+06	10563.3	10563.3	10563.3	10563.3	10563.3	10563.3	10563.3	10563.3	845299	10563.3	10563.3	1.38456e+06	1.29053e+06
Ndufa9	Q9DC69	NADH dehydrogenase [ubiquinone] 1 alpha subcomplex subunit 9, mitochondrial OS=Mus musculus OX=10090 GN=Ndufa9 PE=1 SV=2	10563.3	10563.3	10563.3	10563.3	10563.3	10563.3	10563.3	10563.3	10563.3	10563.3	10563.3	10563.3	10563.3	10563.3	870053	10563.3	10563.3
Ndufs1	Q91VD9	NADH-ubiquinone oxidoreductase 75 kDa subunit, mitochondrial OS=Mus musculus OX=10090 GN=Ndufs1 PE=1 SV=2	10563.3	10563.3	10563.3	10563.3	10563.3	10563.3	92279.8	10563.3	10563.3	128492	10563.3	10563.3	188846	10563.3	707874	10563.3	199981
Ndufs2	Q91WD5	NADH dehydrogenase [ubiquinone] iron-sulfur protein 2, mitochondrial OS=Mus musculus OX=10090 GN=Ndufs2 PE=1 SV=1	10563.3	10563.3	10563.3	10563.3	10563.3	10563.3	10563.3	10563.3	10563.3	10563.3	10563.3	10563.3	117018	10563.3	6.37256e+06	35225.8	10563.3
Nedd4	P46935	E3 ubiquitin-protein ligase NEDD4 OS=Mus musculus OX=10090 GN=Nedd4 PE=1 SV=3	10563.3	10563.3	10563.3	10563.3	10563.3	10563.3	10563.3	10563.3	10563.3	10563.3	10563.3	10563.3	164210	10563.3	10563.3	10563.3	325836
Nefl	P08551	Neurofilament light polypeptide OS=Mus musculus OX=10090 GN=Nefl PE=1 SV=5	10563.3	10563.3	1.4376e+06	7.18967e+06	10563.3	1.50142e+06	497886	10563.3	574312	895733	10563.3	774775	10563.3	10563.3	10563.3	10563.3	10563.3
Nefm	P08553	Neurofilament medium polypeptide OS=Mus musculus OX=10090 GN=Nefm PE=1 SV=4	10563.3	10563.3	10563.3	510213	10563.3	10563.3	10563.3	10563.3	10563.3	10563.3	10563.3	10563.3	10563.3	10563.3	10563.3	10563.3	10563.3
Nelfcd	Q922L6	Negative elongation factor D OS=Mus musculus OX=10090 GN=Nelfcd PE=1 SV=2	1.90587e+06	2.07711e+06	654821	631582	1.47714e+06	795736	981872	407631	864109	10563.3	1.66282e+06	741596	10563.3	10563.3	10563.3	10563.3	10563.3
Nfatc2	Q60591	Nuclear factor of activated T-cells, cytoplasmic 2 OS=Mus musculus OX=10090 GN=Nfatc2 PE=1 SV=3	10563.3	857543	410168	10563.3	523326	517183	782532	10563.3	715934	1.08133e+06	1.78295e+06	1.02406e+06	10563.3	10563.3	10563.3	10563.3	10563.3
Nfkb1	P25799	Nuclear factor NF-kappa-B p105 subunit OS=Mus musculus OX=10090 GN=Nfkb1 PE=1 SV=2	5.48426e+06	6.83252e+06	1.28604e+06	7.17065e+06	1.93742e+06	524576	10563.3	10563.3	10563.3	10563.3	10563.3	10563.3	10563.3	10563.3	10563.3	10563.3	10563.3
Ngp	O08692	Neutrophilic granule protein OS=Mus musculus OX=10090 GN=Ngp PE=1 SV=1	2.09584e+07	2.52197e+07	2.39282e+07	5.28793e+07	2.65101e+07	3.036e+07	1.13072e+08	4.56429e+07	2.00246e+08	5.16928e+07	1.7053e+07	1.72676e+07	3.47735e+07	2.51953e+07	2.9065e+07	2.15983e+07	1.3653e+07
Nhlrc2	Q8BZW8	NHL repeat-containing protein 2 OS=Mus musculus OX=10090 GN=Nhlrc2 PE=1 SV=1	10563.3	10563.3	10563.3	10563.3	10563.3	10563.3	10563.3	10563.3	128638	10563.3	10563.3	10563.3	10563.3	10563.3	10563.3	10563.3	82943.5
Nid1	P10493	Nidogen-1 OS=Mus musculus OX=10090 GN=Nid1 PE=1 SV=2	1.08541e+07	1.1489e+07	7.74782e+06	7.13392e+06	8.72274e+06	6.18209e+06	5.484e+06	1.17504e+07	7.61776e+06	7.9404e+06	7.23262e+06	5.79686e+06	2.54025e+07	9.15188e+06	9.73549e+06	1.42908e+07	4.11869e+07
Nit1	Q8VDK1	Deaminated glutathione amidase OS=Mus musculus OX=10090 GN=Nit1 PE=1 SV=2	350627	334655	396127	451218	559891	453846	116372	10563.3	10563.3	10563.3	545830	10563.3	2.86603e+06	6.46007e+06	928330	3.84589e+06	3.86251e+06
Nme2	Q01768	Nucleoside diphosphate kinase B OS=Mus musculus OX=10090 GN=Nme2 PE=1 SV=1	10563.3	10563.3	10563.3	10563.3	10563.3	10563.3	10563.3	10563.3	10563.3	10563.3	10563.3	10563.3	10563.3	10563.3	10563.3	573292	879920
Nmral1	Q8K2T1	NmrA-like family domain-containing protein 1 OS=Mus musculus OX=10090 GN=Nmral1 PE=1 SV=1	10563.3	10563.3	10563.3	10563.3	10563.3	10563.3	10563.3	10563.3	10563.3	10563.3	10563.3	10563.3	203794	10563.3	10563.3	320897	10563.3
Nom1	Q3UFM5	Nucleolar MIF4G domain-containing protein 1 OS=Mus musculus OX=10090 GN=Nom1 PE=1 SV=2	10563.3	10563.3	10563.3	10563.3	10563.3	10563.3	10563.3	10563.3	10563.3	10563.3	10563.3	10563.3	2.73095e+06	1.46003e+06	2.42922e+06	2.10164e+06	2.50989e+06
Notch1	Q01705	Neurogenic locus notch homolog protein 1 OS=Mus musculus OX=10090 GN=Notch1 PE=1 SV=3	10563.3	10563.3	10563.3	10563.3	10563.3	209564	10563.3	455060	309484	10563.3	10563.3	10563.3	10563.3	10563.3	10563.3	10563.3	10563.3
Notch2	O35516	Neurogenic locus notch homolog protein 2 OS=Mus musculus OX=10090 GN=Notch2 PE=1 SV=2	3.01963e+06	5.23796e+06	2.18806e+06	9.63723e+06	4.42646e+06	3.52018e+06	1.27727e+06	279214	334859	1.6396e+06	674984	670065	99417.1	234744	1.01042e+06	1.69178e+06	263483
Notch3	Q61982	Neurogenic locus notch homolog protein 3 OS=Mus musculus OX=10090 GN=Notch3 PE=1 SV=1	1.41937e+07	2.35414e+07	1.8752e+07	1.50133e+07	1.44354e+07	2.93928e+07	3.7621e+07	7.45162e+06	2.06268e+07	3.73511e+07	4.07106e+07	2.94751e+07	2.1503e+06	2.75719e+06	1.08565e+06	2.45864e+06	1.55218e+06
Npepps	Q11011	Puromycin-sensitive aminopeptidase OS=Mus musculus OX=10090 GN=Npepps PE=1 SV=2	10563.3	10563.3	10563.3	10563.3	10563.3	10563.3	10563.3	10563.3	10563.3	10563.3	10563.3	10563.3	10563.3	208216	170390	10563.3	356777
Npl	Q9DCJ9	N-acetylneuraminate lyase OS=Mus musculus OX=10090 GN=Npl PE=1 SV=1	4.1496e+06	5.0073e+06	6.35477e+06	4.13156e+06	6.28096e+06	5.66026e+06	3.72586e+06	6.15909e+06	3.82095e+06	3.81781e+06	7.45658e+06	5.70056e+06	1.16531e+06	1.35172e+06	1.09811e+06	1.16733e+06	1.44098e+06
Nploc4	P60670	Nuclear protein localization protein 4 homolog OS=Mus musculus OX=10090 GN=Nploc4 PE=1 SV=3	261611	10563.3	10563.3	10563.3	463915	10563.3	10563.3	10563.3	10563.3	10563.3	10563.3	10563.3	10563.3	10563.3	10563.3	10563.3	10563.3
Nqo1	Q64669	NAD(P)H dehydrogenase [quinone] 1 OS=Mus musculus OX=10090 GN=Nqo1 PE=1 SV=3	226044	10563.3	10563.3	10563.3	242547	10563.3	10563.3	291697	10563.3	10563.3	10563.3	10563.3	10563.3	10563.3	10563.3	10563.3	10563.3
Nras	P08556	GTPase NRas OS=Mus musculus OX=10090 GN=Nras PE=1 SV=1	10563.3	10563.3	10563.3	716272	10563.3	10563.3	532074	10563.3	10563.3	10563.3	10563.3	10563.3	396164	230214	10563.3	435629	580829
Nrcam	Q810U4	Neuronal cell adhesion molecule OS=Mus musculus OX=10090 GN=Nrcam PE=1 SV=2	10563.3	10563.3	10563.3	10563.3	10563.3	10563.3	744453	10563.3	10563.3	2.97093e+06	10563.3	10563.3	10563.3	10563.3	10563.3	10563.3	10563.3
Nrp1	P97333	Neuropilin-1 OS=Mus musculus OX=10090 GN=Nrp1 PE=1 SV=2	2.11557e+07	2.5714e+07	1.67841e+07	2.64483e+07	1.47879e+07	4.52176e+07	1.34474e+07	2.03835e+07	1.57566e+07	4.58399e+06	8.67577e+06	1.38243e+07	5.09473e+06	2.21519e+06	6.43205e+06	3.72084e+06	2.03103e+06
Nrp2	O35375	Neuropilin-2 OS=Mus musculus OX=10090 GN=Nrp2 PE=1 SV=2	2.66952e+06	2.33035e+06	2.4968e+06	2.33475e+06	2.17823e+06	3.50676e+06	1.70172e+06	10563.3	1.27607e+06	1.86721e+06	2.33495e+06	1.82659e+06	1.9797e+06	737376	1.10816e+06	3.58378e+06	2.07961e+06
Nsf	P46460	Vesicle-fusing ATPase OS=Mus musculus OX=10090 GN=Nsf PE=1 SV=2	1.33375e+08	1.10585e+08	1.06993e+08	1.59097e+08	1.95837e+08	1.16244e+08	8.81151e+07	3.29543e+07	1.03737e+08	1.04128e+08	1.67711e+08	1.63118e+08	1.73374e+06	772239	1.10208e+06	1.85351e+06	4.47302e+06
Nsfl1c	Q9CZ44	NSFL1 cofactor p47 OS=Mus musculus OX=10090 GN=Nsfl1c PE=1 SV=1	325580	1.77471e+06	2.88611e+06	2.06271e+06	631062	1.69154e+06	832091	10563.3	10563.3	2.46152e+06	1.17261e+06	10563.3	10563.3	10563.3	10563.3	10563.3	1.48003e+06
Nt5c	Q9JM14	5'(3')-deoxyribonucleotidase, cytosolic type OS=Mus musculus OX=10090 GN=Nt5c PE=1 SV=1	279789	669325	162672	466581	383531	143446	10563.3	10563.3	10563.3	10563.3	421639	10563.3	10563.3	10563.3	10563.3	253215	375288
Nt5c3a	Q9D020	Cytosolic 5'-nucleotidase 3A OS=Mus musculus OX=10090 GN=Nt5c3a PE=1 SV=4	1.98758e+06	4.88354e+06	6.19645e+06	5.23524e+06	4.38371e+06	4.63725e+06	5.3455e+06	1.7871e+06	3.71687e+06	4.55092e+06	5.43617e+06	3.34361e+06	10563.3	10563.3	10563.3	10563.3	10563.3
Nucb1	Q02819	Nucleobindin-1 OS=Mus musculus OX=10090 GN=Nucb1 PE=1 SV=2	1.50673e+08	1.3472e+08	6.97196e+07	8.19325e+07	1.27454e+08	9.68278e+07	1.56509e+08	1.9839e+08	2.89716e+08	3.35627e+08	1.34778e+08	1.02816e+08	1.07371e+08	1.38124e+08	3.21011e+07	8.35477e+07	2.2298e+08
Nutf2	P61971	Nuclear transport factor 2 OS=Mus musculus OX=10090 GN=Nutf2 PE=1 SV=1	1.35871e+06	2.62905e+06	1.45539e+06	1.82254e+06	4.14988e+06	358303	847679	10563.3	10563.3	4.00188e+06	2.06161e+06	281579	1.53524e+06	10563.3	10563.3	2.01119e+06	1.06027e+06
Oaf	Q8QZR4	Out at first protein homolog OS=Mus musculus OX=10090 GN=Oaf PE=2 SV=1	1.00151e+07	1.07755e+07	1.28165e+07	1.44292e+07	1.0397e+07	1.56801e+07	3.21659e+07	2.15922e+07	3.04024e+07	1.88791e+07	1.6717e+07	1.54256e+07	3.69966e+07	1.58764e+07	4.19873e+07	3.6428e+07	2.52478e+07
Obi1	Q8K2Y0	ORC ubiquitin ligase 1 OS=Mus musculus OX=10090 GN=Obi1 PE=1 SV=2	10563.3	10563.3	10563.3	10563.3	10563.3	10563.3	10563.3	10563.3	10563.3	10563.3	10563.3	10563.3	1.75212e+07	1.60766e+07	1.18495e+07	1.86859e+07	1.56544e+07
Obp1a	Q9D3H2	Odorant-binding protein 1a OS=Mus musculus OX=10090 GN=Obp1a PE=1 SV=2	2.83227e+06	2.125e+06	3.6874e+06	4.06577e+06	10563.3	2.25917e+06	5.35468e+06	1.3386e+06	2.32296e+06	3.84085e+06	2.48788e+06	10563.3	10563.3	10563.3	10563.3	10563.3	10563.3
Obp2a	Q8K1H9	Odorant-binding protein 2a OS=Mus musculus OX=10090 GN=Obp2a PE=2 SV=1	10563.3	231989	10563.3	295472	472595	10563.3	10563.3	10563.3	10563.3	10563.3	10563.3	10563.3	10563.3	10563.3	10563.3	10563.3	10563.3
Ofd1	Q80Z25	Oral-facial-digital syndrome 1 protein homolog OS=Mus musculus OX=10090 GN=Ofd1 PE=1 SV=1	10563.3	10563.3	10563.3	10563.3	10563.3	10563.3	10563.3	10563.3	10563.3	2.17035e+06	10563.3	10563.3	10563.3	10563.3	10563.3	10563.3	10563.3
Ogn	Q62000	Mimecan OS=Mus musculus OX=10090 GN=Ogn PE=1 SV=1	1.62366e+06	10563.3	1.49931e+06	1.21951e+06	810106	1.20816e+06	1.77711e+06	906705	1.04752e+06	894636	392949	727906	2.21256e+06	1.19844e+06	2.82064e+06	1.54456e+06	916195
Oit3	Q8R4V5	Oncoprotein-induced transcript 3 protein OS=Mus musculus OX=10090 GN=Oit3 PE=2 SV=2	1.37079e+07	1.79104e+07	1.31867e+07	1.95747e+07	2.37108e+07	2.11977e+07	2.35321e+07	1.74315e+07	4.60674e+07	2.31626e+07	3.36984e+07	2.72673e+07	1.39654e+07	1.17197e+07	1.56021e+07	1.69599e+07	1.45565e+07
Olfm1	O88998	Noelin OS=Mus musculus OX=10090 GN=Olfm1 PE=1 SV=1	2.51594e+06	2.7549e+06	557768	2.25916e+06	2.11567e+06	1.59019e+06	522094	4.21822e+06	423823	2.1903e+06	954824	1.27116e+06	1.00606e+06	3.73617e+06	10563.3	10563.3	10563.3
Olfm3	P63056	Noelin-3 OS=Mus musculus OX=10090 GN=Olfm3 PE=1 SV=1	788423	1.27397e+06	1.59359e+06	1.44846e+06	1.76055e+06	260056	3.96749e+06	1.21499e+07	1.64011e+06	4.49648e+06	1.14874e+07	9.60735e+06	2.61629e+08	3.92426e+07	8.00795e+07	2.25173e+08	5.39643e+08
Olfml3	Q8BK62	Olfactomedin-like protein 3 OS=Mus musculus OX=10090 GN=Olfml3 PE=2 SV=2	331836	407933	3.97059e+06	829294	1.09833e+06	231086	927560	633933	1.41922e+06	4.86842e+06	139653	695992	367623	761296	376171	705575	883917
Orm1	Q60590	Alpha-1-acid glycoprotein 1 OS=Mus musculus OX=10090 GN=Orm1 PE=1 SV=1	6.60202e+06	2.18893e+06	2.17857e+06	2.22699e+06	3.21331e+06	3.67604e+06	3.49081e+07	4.3398e+06	3.30285e+07	4.55021e+06	1.86621e+06	4.59623e+06	3.94575e+06	2.67717e+06	3.92256e+07	3.45599e+06	2.93138e+06
Orm2	P07361	Alpha-1-acid glycoprotein 2 OS=Mus musculus OX=10090 GN=Orm2 PE=1 SV=1	927241	10563.3	10563.3	10563.3	10563.3	1.01568e+06	2.25161e+07	1.49205e+06	3.52588e+07	4.53293e+06	10563.3	1.45589e+06	987175	852342	1.34287e+07	1.06968e+06	1.51969e+06
Orm3	Q63805	Alpha-1-acid glycoprotein 3 OS=Mus musculus OX=10090 GN=Orm3 PE=3 SV=1	10563.3	10563.3	10563.3	10563.3	10563.3	10563.3	1.74158e+06	10563.3	1.47908e+06	10563.3	684347	10563.3	1.14642e+06	10563.3	10563.3	1.28095e+06	1.81157e+06
Os9	Q8K2C7	Protein OS-9 OS=Mus musculus OX=10090 GN=Os9 PE=1 SV=2	387912	303731	10563.3	10563.3	10563.3	10563.3	10563.3	10563.3	10563.3	10563.3	10563.3	10563.3	10563.3	10563.3	10563.3	10563.3	10563.3
Osbpl3	Q9DBS9	Oxysterol-binding protein-related protein 3 OS=Mus musculus OX=10090 GN=Osbpl3 PE=1 SV=2	1.17713e+06	554719	10563.3	10563.3	10563.3	10563.3	2.75358e+06	1.53358e+06	3.51449e+06	1.32216e+06	355152	2.05588e+06	10563.3	232578	3.57153e+06	466594	10563.3
Ostf1	Q62422	Osteoclast-stimulating factor 1 OS=Mus musculus OX=10090 GN=Ostf1 PE=1 SV=2	1.06975e+06	3.74522e+06	1.14557e+06	1.81339e+06	1.78281e+06	1.33345e+06	541872	715523	722492	722232	2.50021e+06	381778	1.1135e+06	10563.3	826663	498499	2.17908e+06
Otub1	Q7TQI3	Ubiquitin thioesterase OTUB1 OS=Mus musculus OX=10090 GN=Otub1 PE=1 SV=2	447250	734122	10563.3	1.66646e+06	364229	10563.3	10563.3	10563.3	682499	10563.3	847389	10563.3	1.01694e+06	319394	963333	541284	3.00422e+06
Oxct1	Q9D0K2	Succinyl-CoA:3-ketoacid coenzyme A transferase 1, mitochondrial OS=Mus musculus OX=10090 GN=Oxct1 PE=1 SV=1	10563.3	10563.3	10563.3	368703	10563.3	10563.3	10563.3	10563.3	10563.3	10563.3	10563.3	10563.3	10563.3	10563.3	4.45411e+06	10563.3	1.43549e+06
Oxsr1	Q6P9R2	Serine/threonine-protein kinase OSR1 OS=Mus musculus OX=10090 GN=Oxsr1 PE=1 SV=1	542139	570815	578916	362434	889915	10563.3	10563.3	10563.3	10563.3	188591	10563.3	10563.3	10563.3	10563.3	10563.3	10563.3	10563.3
P4ha1	Q60715	Prolyl 4-hydroxylase subunit alpha-1 OS=Mus musculus OX=10090 GN=P4ha1 PE=1 SV=2	10563.3	10563.3	1.11116e+06	1.35219e+06	10563.3	583327	1.44973e+06	653186	10563.3	646314	792591	807533	10563.3	10563.3	10563.3	10563.3	10563.3
P4hb	P09103	Protein disulfide-isomerase OS=Mus musculus OX=10090 GN=P4hb PE=1 SV=2	9.82495e+07	1.37277e+08	1.20364e+08	1.17766e+08	1.04649e+08	1.05444e+08	1.40533e+08	7.52478e+07	1.24756e+08	1.10952e+08	1.46583e+08	1.0679e+08	6.59966e+07	5.2673e+07	3.62693e+07	7.49555e+07	1.51316e+08
Pabpc1	P29341	Polyadenylate-binding protein 1 OS=Mus musculus OX=10090 GN=Pabpc1 PE=1 SV=2	3.36727e+06	2.93926e+06	3.28852e+06	3.14124e+06	4.1312e+06	1.75436e+06	4.28544e+06	5.14478e+06	3.63279e+06	3.23994e+06	4.4062e+06	1.67335e+06	929447	1.3506e+06	263293	1.28506e+06	2.62412e+06
Pacsin1	Q61644	Protein kinase C and casein kinase substrate in neurons protein 1 OS=Mus musculus OX=10090 GN=Pacsin1 PE=1 SV=1	10563.3	10563.3	10563.3	1.77184e+06	10563.3	10563.3	10563.3	10563.3	10563.3	369197	10563.3	10563.3	10563.3	10563.3	10563.3	10563.3	10563.3
Pacsin2	Q9WVE8	Protein kinase C and casein kinase substrate in neurons protein 2 OS=Mus musculus OX=10090 GN=Pacsin2 PE=1 SV=1	10563.3	1.26409e+06	944524	640403	1.41769e+06	10563.3	408676	10563.3	10563.3	10563.3	742952	10563.3	10563.3	10563.3	10563.3	10563.3	10563.3
Pafah1b2	Q61206	Platelet-activating factor acetylhydrolase IB subunit beta OS=Mus musculus OX=10090 GN=Pafah1b2 PE=1 SV=2	1.43347e+06	1.61453e+06	1.81522e+06	1.67007e+06	2.87211e+06	1.09839e+06	1.03709e+06	1.59778e+06	1.03993e+06	2.35953e+06	1.84176e+06	512683	772843	373123	581751	1.03635e+06	1.15643e+06
Pah	P16331	Phenylalanine-4-hydroxylase OS=Mus musculus OX=10090 GN=Pah PE=1 SV=4	10563.3	10563.3	10563.3	10563.3	10563.3	10563.3	10563.3	10563.3	10563.3	686721	10563.3	10563.3	10563.3	10563.3	10563.3	10563.3	10563.3
Paics	Q9DCL9	Multifunctional protein ADE2 OS=Mus musculus OX=10090 GN=Paics PE=1 SV=4	10563.3	286514	10563.3	10563.3	586516	10563.3	10563.3	10563.3	10563.3	277141	10563.3	10563.3	10563.3	10563.3	10563.3	10563.3	10563.3
Pam	P97467	Peptidyl-glycine alpha-amidating monooxygenase OS=Mus musculus OX=10090 GN=Pam PE=1 SV=2	603965	430632	138798	899495	732941	1.17594e+06	259458	440755	540329	976273	1.0194e+06	516503	539465	605595	10563.3	1.33099e+06	1.01618e+06
Papln	Q9EPX2	Papilin OS=Mus musculus OX=10090 GN=Papln PE=2 SV=2	2.71643e+06	3.7763e+06	3.32721e+06	3.7024e+06	2.7173e+06	3.36058e+06	3.3387e+06	3.95167e+06	2.00576e+06	5.19645e+06	3.53041e+06	4.52654e+06	4.21599e+06	3.06054e+06	5.36485e+06	2.36851e+06	2.56435e+06
Park7	Q99LX0	Parkinson disease protein 7 homolog OS=Mus musculus OX=10090 GN=Park7 PE=1 SV=1	879924	2.70241e+06	234554	3.07147e+06	4.37744e+06	10563.3	784071	337007	1.0692e+06	1.56509e+06	819797	300540	1.53684e+06	10563.3	2.32551e+06	2.46145e+06	1.32965e+06
Parvb	Q9ES46	Beta-parvin OS=Mus musculus OX=10090 GN=Parvb PE=1 SV=1	1.24933e+07	3.52342e+07	3.35872e+07	4.19288e+07	1.75825e+07	1.66205e+07	2.55771e+07	1.00826e+07	2.75221e+07	2.34972e+07	4.52596e+07	7.04512e+06	5.68799e+06	1.92399e+06	2.92554e+06	7.94728e+06	1.89941e+07
Pbld1	Q9DCG6	Phenazine biosynthesis-like domain-containing protein 1 OS=Mus musculus OX=10090 GN=Pbld1 PE=1 SV=2	10563.3	10563.3	10563.3	10563.3	853686	672148	10563.3	10563.3	10563.3	10563.3	10563.3	10563.3	10563.3	10563.3	10563.3	505519	10563.3
Pc	Q05920	Pyruvate carboxylase, mitochondrial OS=Mus musculus OX=10090 GN=Pc PE=1 SV=1	10563.3	10563.3	10563.3	10563.3	10563.3	10563.3	10563.3	10563.3	10563.3	10563.3	10563.3	10563.3	786262	2.80172e+06	10563.3	511040	1.99723e+06
Pcbp1	P60335	Poly(rC)-binding protein 1 OS=Mus musculus OX=10090 GN=Pcbp1 PE=1 SV=1	2.18828e+06	3.8429e+06	2.76464e+06	3.46377e+06	2.67052e+06	3.93038e+06	3.85438e+06	2.76706e+06	4.83286e+06	4.08172e+06	7.82672e+06	1.52533e+06	1.19615e+06	445682	1.01206e+06	1.69298e+06	2.53799e+06
Pcbp2	Q61990	Poly(rC)-binding protein 2 OS=Mus musculus OX=10090 GN=Pcbp2 PE=1 SV=1	603160	410811	898436	1.48759e+06	956349	348727	1.05809e+06	273688	1.35184e+06	1.09943e+06	1.87758e+06	10563.3	10563.3	10563.3	10563.3	10563.3	10563.3
Pcdh12	O55134	Protocadherin-12 OS=Mus musculus OX=10090 GN=Pcdh12 PE=1 SV=2	2.26685e+06	1.72365e+06	10563.3	10563.3	299193	10563.3	10563.3	10563.3	10563.3	10563.3	10563.3	10563.3	10563.3	10563.3	299183	10563.3	10563.3
Pcolce	Q61398	Procollagen C-endopeptidase enhancer 1 OS=Mus musculus OX=10090 GN=Pcolce PE=1 SV=2	3.08235e+06	2.43462e+06	4.96184e+06	3.32967e+06	1.07636e+06	3.14492e+06	7.4538e+06	1.41274e+06	6.04513e+06	4.32538e+06	1.33392e+06	1.03177e+06	2.66825e+06	1.57899e+06	2.93208e+06	1.62893e+06	1.37457e+06
Pcsk1n	Q9QXV0	ProSAAS OS=Mus musculus OX=10090 GN=Pcsk1n PE=1 SV=2	570661	511638	639104	1.01459e+06	1.20771e+06	856123	282801	260889	10563.3	10563.3	455805	10563.3	2.4506e+06	282544	1.09182e+06	1.8507e+06	903626
Pcsk5	Q04592	Proprotein convertase subtilisin/kexin type 5 OS=Mus musculus OX=10090 GN=Pcsk5 PE=1 SV=3	1.17845e+06	430702	2.11338e+06	721378	390731	2.40061e+06	2.59071e+06	3.79985e+06	1.63687e+06	4.97402e+06	1.60846e+06	2.84863e+06	2.39749e+06	3.07065e+06	3.00312e+06	3.1658e+06	1.88306e+06
Pcsk9	Q80W65	Proprotein convertase subtilisin/kexin type 9 OS=Mus musculus OX=10090 GN=Pcsk9 PE=1 SV=2	2.02684e+06	964681	1.91021e+06	4.15856e+06	1.04103e+06	1.95173e+06	484549	979355	1.92849e+06	10563.3	175185	2.0384e+06	2.53151e+06	394813	2.1052e+06	1.63299e+06	1.70589e+06
Pcyox1	Q9CQF9	Prenylcysteine oxidase OS=Mus musculus OX=10090 GN=Pcyox1 PE=1 SV=1	8.5225e+07	1.04777e+08	1.02894e+08	1.19186e+08	1.24534e+08	1.0114e+08	9.20336e+07	1.35066e+08	6.87452e+07	7.60226e+07	1.96458e+08	1.30071e+08	1.71175e+08	1.09296e+08	1.29771e+08	1.56944e+08	1.6384e+08
Pcyox1l	Q8C7K6	Prenylcysteine oxidase-like OS=Mus musculus OX=10090 GN=Pcyox1l PE=1 SV=1	987745	1.40426e+06	1.89678e+06	1.82342e+06	914262	1.68005e+06	946023	406249	664392	1.59032e+06	930860	943703	10563.3	10563.3	10563.3	10563.3	10563.3
Pcyt2	Q922E4	Ethanolamine-phosphate cytidylyltransferase OS=Mus musculus OX=10090 GN=Pcyt2 PE=1 SV=1	10563.3	10563.3	10563.3	10563.3	10563.3	10563.3	10563.3	10563.3	10563.3	10563.3	10563.3	10563.3	10563.3	317661	10563.3	437348	756191
Pdcd10	Q8VE70	Programmed cell death protein 10 OS=Mus musculus OX=10090 GN=Pdcd10 PE=1 SV=1	10563.3	3.71289e+07	2.22528e+07	566780	385107	2.26789e+07	4.50203e+07	466269	7.96357e+07	2.12e+07	1.59649e+07	2.19699e+07	10563.3	10563.3	10563.3	10563.3	10563.3
Pdcd5	P56812	Programmed cell death protein 5 OS=Mus musculus OX=10090 GN=Pdcd5 PE=1 SV=3	205104	296571	10563.3	10563.3	406666	10563.3	10563.3	10563.3	10563.3	10563.3	331907	10563.3	10563.3	10563.3	10563.3	10563.3	10563.3
Pdcd6	P12815	Programmed cell death protein 6 OS=Mus musculus OX=10090 GN=Pdcd6 PE=1 SV=2	1.5002e+06	2.65287e+06	3.20794e+06	2.2861e+06	1.84086e+06	3.21142e+06	1.03908e+07	1.78881e+06	7.75245e+06	4.56788e+06	5.69792e+06	4.04055e+06	2.78991e+06	1.00169e+06	10563.3	4.63484e+06	6.11672e+06
Pdcd6ip	Q9WU78	Programmed cell death 6-interacting protein OS=Mus musculus OX=10090 GN=Pdcd6ip PE=1 SV=3	379164	466227	267201	244033	493332	987168	10563.3	10563.3	10563.3	10563.3	302829	209544	10563.3	10563.3	10563.3	10563.3	10563.3
Pde5a	Q8CG03	cGMP-specific 3',5'-cyclic phosphodiesterase OS=Mus musculus OX=10090 GN=Pde5a PE=1 SV=2	4.86905e+06	1.00026e+07	6.31136e+06	6.61273e+06	3.77151e+06	4.20705e+06	2.97249e+06	1.41466e+06	2.52077e+06	1.18745e+06	5.93908e+06	1.02694e+06	1.31834e+06	690789	620890	2.47273e+06	6.34732e+06
Pdgfa	P20033	Platelet-derived growth factor subunit A OS=Mus musculus OX=10090 GN=Pdgfa PE=2 SV=2	706875	1.57804e+06	635828	457113	470710	246310	896805	749699	465926	304392	10563.3	261123	870886	10563.3	10563.3	617886	2.14389e+06
Pdgfb	P31240	Platelet-derived growth factor subunit B OS=Mus musculus OX=10090 GN=Pdgfb PE=2 SV=1	6.17845e+06	9.99925e+06	4.39732e+06	1.40083e+06	1.87529e+06	1.58563e+06	2.34332e+06	1.40116e+06	1.5711e+06	5.77289e+06	2.14852e+06	1.36722e+06	10563.3	10563.3	222166	519416	1.1911e+06
Pdgfc	Q8CI19	Platelet-derived growth factor C OS=Mus musculus OX=10090 GN=Pdgfc PE=1 SV=2	428561	10563.3	507354	497372	404183	522306	405539	406659	245658	369396	319216	456213	660865	10563.3	10563.3	925789	1.02992e+06
Pdgfra	P26618	Platelet-derived growth factor receptor alpha OS=Mus musculus OX=10090 GN=Pdgfra PE=1 SV=3	1.90722e+06	1.60792e+06	1.2891e+06	1.07674e+06	1.11291e+06	1.56562e+06	10563.3	578079	228488	10563.3	10563.3	10563.3	548464	10563.3	566933	10563.3	10563.3
Pdha1	P35486	Pyruvate dehydrogenase E1 component subunit alpha, somatic form, mitochondrial OS=Mus musculus OX=10090 GN=Pdha1 PE=1 SV=1	10563.3	10563.3	10563.3	508686	10563.3	10563.3	10563.3	10563.3	277217	10563.3	10563.3	10563.3	10563.3	10563.3	10563.3	10563.3	10563.3
Pdia3	P27773	Protein disulfide-isomerase A3 OS=Mus musculus OX=10090 GN=Pdia3 PE=1 SV=2	1.23337e+06	1.42609e+06	1.54901e+06	2.40898e+06	999720	814135	843323	10563.3	754519	744134	349508	543624	10563.3	10563.3	10563.3	10563.3	10563.3
Pdia4	P08003	Protein disulfide-isomerase A4 OS=Mus musculus OX=10090 GN=Pdia4 PE=1 SV=3	7.65244e+07	1.23889e+08	1.37842e+08	1.13285e+08	8.90173e+07	3.42268e+08	7.97275e+07	3.151e+07	8.03781e+07	1.25365e+08	1.06553e+08	1.20455e+08	1.22368e+07	1.26166e+07	4.7688e+06	1.53937e+07	2.18333e+07
Pdia6	Q922R8	Protein disulfide-isomerase A6 OS=Mus musculus OX=10090 GN=Pdia6 PE=1 SV=3	1.2069e+07	1.1709e+07	2.38852e+07	2.0097e+07	4.18543e+06	2.84174e+06	5.60982e+06	1.23365e+07	3.78527e+06	1.28064e+07	2.17438e+07	439953	7.47268e+06	1.68316e+06	599800	3.35576e+06	9.94054e+06
Pdlim1	O70400	PDZ and LIM domain protein 1 OS=Mus musculus OX=10090 GN=Pdlim1 PE=1 SV=4	10563.3	10563.3	565378	646763	308563	166120	10563.3	10563.3	476418	762738	1.58228e+06	330159	10563.3	10563.3	10563.3	10563.3	10563.3
Pdlim5	Q8CI51	PDZ and LIM domain protein 5 OS=Mus musculus OX=10090 GN=Pdlim5 PE=1 SV=4	209134	404526	414459	401185	10563.3	230376	10563.3	10563.3	261980	10563.3	629333	10563.3	10563.3	10563.3	10563.3	10563.3	10563.3
Pdlim7	Q3TJD7	PDZ and LIM domain protein 7 OS=Mus musculus OX=10090 GN=Pdlim7 PE=1 SV=1	10563.3	441823	451868	10563.3	10563.3	10563.3	10563.3	10563.3	10563.3	10563.3	10563.3	10563.3	10563.3	10563.3	10563.3	10563.3	10563.3
Pdxk	Q8K183	Pyridoxal kinase OS=Mus musculus OX=10090 GN=Pdxk PE=1 SV=1	1.46957e+06	4.33413e+06	1.04204e+07	5.58074e+06	10563.3	5.63942e+06	5.75613e+06	10563.3	3.8573e+06	4.62587e+06	3.32657e+06	2.0649e+06	425738	866509	905313	1.33804e+06	1.4039e+06
Pea15	Q62048	Astrocytic phosphoprotein PEA-15 OS=Mus musculus OX=10090 GN=Pea15 PE=1 SV=1	463278	397719	10563.3	802061	461725	10563.3	259761	592401	10563.3	375739	1.07836e+06	10563.3	10563.3	10563.3	10563.3	10563.3	10563.3
Pebp1	P70296	Phosphatidylethanolamine-binding protein 1 OS=Mus musculus OX=10090 GN=Pebp1 PE=1 SV=3	1.42247e+06	2.35387e+06	3.74445e+06	4.72269e+06	1.88341e+06	2.90218e+06	4.98187e+06	10563.3	2.95161e+06	6.69456e+06	5.55888e+06	3.9604e+06	10563.3	10563.3	10563.3	10563.3	10563.3
Pecr	Q99MZ7	Peroxisomal trans-2-enoyl-CoA reductase OS=Mus musculus OX=10090 GN=Pecr PE=1 SV=1	10563.3	10563.3	10563.3	10563.3	10563.3	10563.3	10563.3	10563.3	10563.3	10563.3	10563.3	10563.3	2.29899e+06	5.36869e+06	10563.3	5.34743e+06	7.05292e+06
Pepd	Q11136	Xaa-Pro dipeptidase OS=Mus musculus OX=10090 GN=Pepd PE=1 SV=3	2.37796e+07	1.43489e+07	1.32918e+07	1.10342e+07	9.79641e+06	1.26685e+07	2.29918e+06	4.21037e+06	2.07497e+06	6.47896e+06	7.04444e+06	6.05566e+06	5.80025e+06	4.83651e+06	2.35152e+06	5.35179e+06	6.29981e+06
Pf4	Q9Z126	Platelet factor 4 OS=Mus musculus OX=10090 GN=Pf4 PE=1 SV=1	2.62135e+09	3.80073e+09	3.20386e+09	2.0297e+09	2.46925e+09	1.75937e+09	3.35052e+09	2.69872e+09	2.42183e+09	2.12097e+09	8.22197e+08	1.12417e+09	1.55498e+09	1.59309e+08	7.16874e+08	1.12221e+09	2.59373e+09
Pfas	Q5SUR0	Phosphoribosylformylglycinamidine synthase OS=Mus musculus OX=10090 GN=Pfas PE=1 SV=1	5.34963e+06	678422	10563.3	311308	10563.3	10563.3	10563.3	478974	10563.3	10563.3	2.08232e+06	2.51599e+06	10563.3	10563.3	10563.3	10563.3	10563.3
Pfdn2	O70591	Prefoldin subunit 2 OS=Mus musculus OX=10090 GN=Pfdn2 PE=1 SV=2	10563.3	10563.3	673254	10563.3	10563.3	816995	264908	10563.3	10563.3	500217	351557	411477	10563.3	10563.3	10563.3	10563.3	10563.3
Pfkfb1	P70266	6-phosphofructo-2-kinase/fructose-2,6-bisphosphatase 1 OS=Mus musculus OX=10090 GN=Pfkfb1 PE=1 SV=2	10563.3	10563.3	10563.3	10563.3	10563.3	10563.3	10563.3	10563.3	10563.3	10563.3	10563.3	10563.3	247991	386701	10563.3	304171	831628
Pfkl	P12382	ATP-dependent 6-phosphofructokinase, liver type OS=Mus musculus OX=10090 GN=Pfkl PE=1 SV=4	493604	1.05396e+06	1.15872e+06	891299	647552	842254	767176	10563.3	361333	445458	1.51891e+06	786108	1.33863e+06	285632	772487	1.72495e+06	2.77327e+06
Pfkm	P47857	ATP-dependent 6-phosphofructokinase, muscle type OS=Mus musculus OX=10090 GN=Pfkm PE=1 SV=3	1.65194e+06	3.13808e+06	712021	2.31435e+06	1.80752e+06	479016	389668	477217	10563.3	977527	663742	10563.3	749863	366990	10563.3	531966	654101
Pfn1	P62962	Profilin-1 OS=Mus musculus OX=10090 GN=Pfn1 PE=1 SV=2	2.01552e+06	5.09316e+06	4.56804e+06	7.35527e+06	2.95121e+06	3.12353e+06	3.65395e+06	1.46665e+06	2.55158e+06	1.5336e+06	6.73678e+06	1.22216e+06	1.82155e+06	845055	1.78309e+06	4.16507e+06	5.20871e+06
Pfn2	Q9JJV2	Profilin-2 OS=Mus musculus OX=10090 GN=Pfn2 PE=1 SV=3	2.09665e+06	2.47253e+06	2.54448e+06	894353	1.07497e+06	975342	1.31801e+06	2.2134e+06	898066	1.10636e+06	697248	10563.3	10563.3	10563.3	10563.3	10563.3	10563.3
Pgam1	Q9DBJ1	Phosphoglycerate mutase 1 OS=Mus musculus OX=10090 GN=Pgam1 PE=1 SV=3	6.49422e+07	5.07861e+07	6.56951e+07	7.50104e+07	7.06717e+07	6.45881e+07	7.12423e+07	6.89842e+07	7.47376e+07	5.71616e+07	7.0101e+07	5.97472e+07	10563.3	10563.3	10563.3	10563.3	10563.3
Pgghg	Q8BP56	Protein-glucosylgalactosylhydroxylysine glucosidase OS=Mus musculus OX=10090 GN=Pgghg PE=1 SV=1	10563.3	418616	361407	242432	10563.3	10563.3	203977	683604	301873	231500	747927	327576	1.12829e+07	1.31675e+07	1.59722e+07	1.42078e+07	6.51647e+06
Pgk1	P09411	Phosphoglycerate kinase 1 OS=Mus musculus OX=10090 GN=Pgk1 PE=1 SV=4	10563.3	10563.3	10563.3	3.65963e+06	10563.3	10563.3	652149	10563.3	10563.3	236535	10563.3	10563.3	10563.3	10563.3	485860	10563.3	10563.3
Pgls	Q9CQ60	6-phosphogluconolactonase OS=Mus musculus OX=10090 GN=Pgls PE=1 SV=1	10563.3	10563.3	10563.3	10563.3	246084	10563.3	10563.3	10563.3	10563.3	10563.3	10563.3	10563.3	47183.9	10563.3	268309	10563.3	10563.3
Pglyrp2	Q8VCS0	N-acetylmuramoyl-L-alanine amidase OS=Mus musculus OX=10090 GN=Pglyrp2 PE=1 SV=1	4.75905e+07	6.49329e+07	7e+07	8.08735e+07	3.68106e+07	7.49126e+07	3.34696e+07	4.26855e+07	1.00327e+08	6.00592e+07	8.96244e+07	7.67075e+07	7.54821e+07	1.55888e+08	1.12923e+08	1.46097e+08	7.38176e+07
Pgm1	Q9D0F9	Phosphoglucomutase-1 OS=Mus musculus OX=10090 GN=Pgm1 PE=1 SV=4	8.47831e+06	1.45591e+07	1.77013e+07	1.16448e+07	1.11492e+07	1.58867e+07	7.5165e+06	10563.3	7.3762e+06	1.51098e+07	1.87778e+07	1.69e+07	2.10698e+07	6.01939e+06	6.85604e+06	1.14559e+07	1.79479e+07
Pgp	Q8CHP8	Glycerol-3-phosphate phosphatase OS=Mus musculus OX=10090 GN=Pgp PE=1 SV=1	2.24022e+06	1.02019e+06	749490	2.32669e+06	2.64172e+06	2.03077e+06	328560	10563.3	317734	830001	1.05767e+06	165785	10563.3	10563.3	10563.3	10563.3	10563.3
Pgrmc1	O55022	Membrane-associated progesterone receptor component 1 OS=Mus musculus OX=10090 GN=Pgrmc1 PE=1 SV=4	10563.3	10563.3	10563.3	10563.3	10563.3	10563.3	10563.3	10563.3	10563.3	431075	10563.3	10563.3	10563.3	954698	10563.3	669865	1.27642e+06
Phgdh	Q61753	D-3-phosphoglycerate dehydrogenase OS=Mus musculus OX=10090 GN=Phgdh PE=1 SV=3	778445	1.71028e+06	1.20522e+06	1.5668e+06	2.81709e+06	346075	1.77632e+06	902037	218950	2.63459e+06	4.00064e+06	10563.3	1.33059e+06	930230	323023	1.65934e+06	2.54622e+06
Piga	Q64323	N-acetylglucosaminyl-phosphatidylinositol biosynthetic protein OS=Mus musculus OX=10090 GN=Piga PE=2 SV=1	2.11288e+06	1.6466e+06	1.89682e+06	2.07213e+06	1.85733e+06	1.59164e+06	1.92053e+06	1.2053e+06	2.15549e+06	1.08875e+06	1.32146e+06	1.34398e+06	10563.3	10563.3	10563.3	10563.3	10563.3
Pign	Q9R1S3	GPI ethanolamine phosphate transferase 1 OS=Mus musculus OX=10090 GN=Pign PE=2 SV=2	847342	10563.3	10563.3	1.27088e+06	1.8399e+06	10563.3	10563.3	350838	10563.3	10563.3	10563.3	10563.3	10563.3	10563.3	10563.3	10563.3	10563.3
Pigr	O70570	Polymeric immunoglobulin receptor OS=Mus musculus OX=10090 GN=Pigr PE=1 SV=1	2.46459e+07	2.4743e+07	3.07545e+07	4.6793e+07	2.98302e+07	3.17555e+07	6.03745e+07	1.29172e+08	6.67177e+07	5.05683e+08	1.79525e+08	1.40588e+08	8.78608e+07	2.27803e+08	5.3493e+07	1.91374e+08	1.78013e+08
Pip	P02816	Prolactin-inducible protein homolog OS=Mus musculus OX=10090 GN=Pip PE=2 SV=3	6.70145e+07	8.05001e+07	1.85985e+07	9.43681e+07	4.31126e+07	4.17201e+07	5.50259e+07	5.91989e+07	2.74452e+07	5.75227e+07	9.93643e+07	4.70475e+07	2.57867e+07	3.28499e+07	2.0527e+07	5.01002e+07	1.95806e+07
Pip4k2a	O70172	Phosphatidylinositol 5-phosphate 4-kinase type-2 alpha OS=Mus musculus OX=10090 GN=Pip4k2a PE=1 SV=1	10563.3	269837	239970	248068	336913	10563.3	10563.3	10563.3	10563.3	10563.3	10563.3	10563.3	10563.3	10563.3	10563.3	10563.3	10563.3
Pklr	P53657	Pyruvate kinase PKLR OS=Mus musculus OX=10090 GN=Pklr PE=1 SV=1	2.82149e+06	4.93591e+07	5.85144e+06	2.35212e+06	1.1882e+07	1.61808e+06	4.08655e+06	2.28964e+06	1.49664e+06	5.87445e+06	6.8818e+06	934133	1.55808e+06	3.66463e+06	298167	4.31102e+06	5.19133e+06
Pkm	P52480	Pyruvate kinase PKM OS=Mus musculus OX=10090 GN=Pkm PE=1 SV=4	1.71788e+08	2.40419e+08	1.74512e+08	2.51826e+08	1.64238e+08	1.94986e+08	1.63502e+08	1.57192e+08	1.91454e+08	1.23617e+08	2.12353e+08	1.06033e+08	1.67988e+08	1.10379e+08	1.17705e+08	1.95811e+08	2.0076e+08
Pla1a	Q8VI78	Phospholipase A1 member A OS=Mus musculus OX=10090 GN=Pla1a PE=2 SV=3	6.36201e+06	7.18448e+06	9.86051e+06	1.77014e+07	8.53447e+06	6.59648e+06	4.12598e+07	9.89813e+06	2.60894e+07	1.7614e+07	1.17478e+07	5.08352e+07	3.30861e+06	5.32789e+06	3.81638e+06	4.0963e+06	2.67305e+06
Pla2g12b	Q99P27	Group XIIB secretory phospholipase A2-like protein OS=Mus musculus OX=10090 GN=Pla2g12b PE=1 SV=1	671634	410456	220942	248785	1.18336e+06	664991	1.37319e+06	2.40101e+06	1.93021e+06	2.26582e+06	903959	1.01233e+06	10563.3	10563.3	10563.3	10563.3	10563.3
Pla2g4a	P47713	Cytosolic phospholipase A2 OS=Mus musculus OX=10090 GN=Pla2g4a PE=1 SV=1	75643	10563.3	10563.3	209261	10563.3	10563.3	10563.3	10563.3	10563.3	10563.3	10563.3	10563.3	10563.3	10563.3	10563.3	10563.3	10563.3
Pla2g4d	Q50L43	Cytosolic phospholipase A2 delta OS=Mus musculus OX=10090 GN=Pla2g4d PE=1 SV=3	10563.3	10563.3	10563.3	10563.3	10563.3	10563.3	10563.3	10563.3	10563.3	10563.3	10563.3	10563.3	4.5912e+06	5.15483e+06	4.11489e+06	4.19022e+06	6.16056e+06
Pla2g7	Q60963	Platelet-activating factor acetylhydrolase OS=Mus musculus OX=10090 GN=Pla2g7 PE=1 SV=2	2.6551e+08	3.34012e+08	4.3261e+08	4.88436e+08	4.4078e+08	4.43331e+08	3.19059e+08	3.11642e+08	6.09061e+08	5.85792e+08	3.15131e+08	3.95382e+08	3.98287e+08	5.54926e+08	5.16993e+08	5.90363e+08	3.67157e+08
Plaa	P27612	Phospholipase A-2-activating protein OS=Mus musculus OX=10090 GN=Plaa PE=1 SV=4	10563.3	10563.3	779386	376937	308641	433381	10563.3	10563.3	10563.3	10563.3	364667	10563.3	10563.3	10563.3	10563.3	10563.3	10563.3
Plcg2	Q8CIH5	1-phosphatidylinositol 4,5-bisphosphate phosphodiesterase gamma-2 OS=Mus musculus OX=10090 GN=Plcg2 PE=1 SV=1	10563.3	10563.3	10563.3	10563.3	10563.3	10563.3	10563.3	10563.3	10563.3	10563.3	10563.3	10563.3	208694	10563.3	10563.3	294734	432195
Plch1	Q4KWH5	1-phosphatidylinositol 4,5-bisphosphate phosphodiesterase eta-1 OS=Mus musculus OX=10090 GN=Plch1 PE=2 SV=1	10563.3	10563.3	10563.3	10563.3	10563.3	10563.3	10563.3	10563.3	10563.3	10563.3	10563.3	10563.3	893614	1.25159e+06	644501	1.2999e+06	1.95584e+06
Plec	Q9QXS1	Plectin OS=Mus musculus OX=10090 GN=Plec PE=1 SV=3	10563.3	10563.3	353542	10563.3	598381	10563.3	581100	10563.3	456947	10563.3	462978	371874	10563.3	10563.3	10563.3	10563.3	10563.3
Plek	Q9JHK5	Pleckstrin OS=Mus musculus OX=10090 GN=Plek PE=1 SV=1	1.871e+07	4.70625e+07	4.22873e+07	3.92976e+07	2.14012e+07	2.04351e+07	2.1536e+07	1.01851e+07	3.22983e+07	2.20357e+07	3.83608e+07	6.84123e+06	1.84262e+07	7.9278e+06	5.50219e+06	1.82324e+07	7.51438e+07
Plekho2	Q8K124	Pleckstrin homology domain-containing family O member 2 OS=Mus musculus OX=10090 GN=Plekho2 PE=1 SV=1	10563.3	10563.3	10563.3	199969	10563.3	10563.3	10563.3	10563.3	10563.3	10563.3	186656	10563.3	10563.3	10563.3	10563.3	10563.3	10563.3
Plekhs1	Q8BW88	Pleckstrin homology domain-containing family S member 1 OS=Mus musculus OX=10090 GN=Plekhs1 PE=2 SV=2	10563.3	10563.3	10563.3	10563.3	10563.3	10563.3	10563.3	10563.3	10563.3	10563.3	10563.3	10563.3	785882	1.41654e+06	1.08205e+06	1.02581e+06	1.27746e+06
Plg	P20918	Plasminogen OS=Mus musculus OX=10090 GN=Plg PE=1 SV=3	6.16097e+09	7.52306e+09	7.28272e+09	5.7482e+09	5.10513e+09	8.213e+09	7.45544e+09	4.5866e+09	6.36683e+09	7.11127e+09	6.0323e+09	7.14314e+09	6.60527e+09	6.54026e+09	7.04179e+09	6.99679e+09	4.88536e+09
Plin1	Q8CGN5	Perilipin-1 OS=Mus musculus OX=10090 GN=Plin1 PE=1 SV=2	10563.3	10563.3	10563.3	10563.3	10563.3	10563.3	10563.3	509212	10563.3	310366	10563.3	10563.3	568283	575878	341493	647813	925897
Plin2	P43883	Perilipin-2 OS=Mus musculus OX=10090 GN=Plin2 PE=1 SV=2	10563.3	10563.3	10563.3	10563.3	10563.3	10563.3	10563.3	10563.3	10563.3	10563.3	10563.3	10563.3	613320	10563.3	339374	10563.3	1.29292e+06
Plin3	Q9DBG5	Perilipin-3 OS=Mus musculus OX=10090 GN=Plin3 PE=1 SV=1	1.0282e+06	10563.3	558808	1.63902e+06	670682	868190	1.39266e+06	937912	923924	1.23262e+06	563430	1.1493e+06	10563.3	10563.3	10563.3	10563.3	10563.3
Plin4	O88492	Perilipin-4 OS=Mus musculus OX=10090 GN=Plin4 PE=1 SV=2	10563.3	570576	341474	770046	302658	1.18125e+06	390873	768882	10563.3	274227	442037	10563.3	10563.3	10563.3	10563.3	194995	446174
Plod1	Q9R0E2	Procollagen-lysine,2-oxoglutarate 5-dioxygenase 1 OS=Mus musculus OX=10090 GN=Plod1 PE=1 SV=1	6.04139e+07	6.5866e+07	1.09852e+08	1.03639e+08	1.28059e+08	1.315e+08	1.01143e+08	1.12437e+08	7.40172e+07	8.5079e+07	1.0314e+08	9.70623e+07	1.51118e+08	9.94565e+07	1.16758e+08	1.37589e+08	1.92083e+08
Plod3	Q9R0E1	Multifunctional procollagen lysine hydroxylase and glycosyltransferase LH3 OS=Mus musculus OX=10090 GN=Plod3 PE=1 SV=1	8.76477e+06	3.7125e+07	4.94294e+07	3.32388e+07	2.45182e+06	4.02583e+07	1.77523e+07	4.41869e+06	1.85225e+07	1.39887e+07	2.02685e+07	819446	2.73698e+06	3.4078e+06	2.90324e+06	2.64546e+06	4.10534e+06
Plp1	P60202	Myelin proteolipid protein OS=Mus musculus OX=10090 GN=Plp1 PE=1 SV=2	1.86479e+06	786361	650375	5.36459e+07	689341	726511	1.30638e+07	7.04684e+06	1.1199e+06	1.69351e+07	3.53248e+06	1.22983e+06	10563.3	10563.3	10563.3	10563.3	10563.3
Pls1	Q3V0K9	Plastin-1 OS=Mus musculus OX=10090 GN=Pls1 PE=1 SV=1	3.65339e+06	5.2067e+06	2.42955e+06	3.5458e+06	1.91984e+06	2.33741e+06	418296	899735	322238	1.96994e+06	4.364e+06	781672	286574	10563.3	10563.3	336740	1.06769e+06
Pltp	P55065	Phospholipid transfer protein OS=Mus musculus OX=10090 GN=Pltp PE=1 SV=1	5.50151e+08	5.36463e+08	5.88525e+08	6.94886e+08	6.69333e+08	6.33592e+08	8.92458e+08	1.17132e+09	6.10375e+08	5.55526e+08	9.00717e+08	4.54247e+08	4.27042e+09	1.36448e+09	2.33369e+09	4.90739e+09	4.94456e+09
Plvap	Q91VC4	Plasmalemma vesicle-associated protein OS=Mus musculus OX=10090 GN=Plvap PE=1 SV=1	899192	1.24464e+06	612457	1.49473e+06	929599	2.04429e+06	1.25351e+06	1.97672e+06	1.97723e+06	2.38526e+06	1.79939e+06	2.97323e+06	672647	1.07893e+06	311978	10563.3	1.78621e+06
Plxdc2	Q9DC11	Plexin domain-containing protein 2 OS=Mus musculus OX=10090 GN=Plxdc2 PE=1 SV=1	269014	243814	742274	1.92316e+06	1.40689e+06	1.22159e+06	610783	353108	233573	10563.3	595907	1.18076e+06	4.32442e+06	5.47433e+06	3.4475e+06	5.27792e+06	1.46092e+06
Plxna3	P70208	Plexin-A3 OS=Mus musculus OX=10090 GN=Plxna3 PE=1 SV=2	10563.3	10563.3	10563.3	219432	10563.3	338613	723133	10563.3	392163	355159	10563.3	10563.3	10563.3	10563.3	10563.3	10563.3	10563.3
Plxnb2	B2RXS4	Plexin-B2 OS=Mus musculus OX=10090 GN=Plxnb2 PE=1 SV=1	1.8707e+06	884741	553148	1.70389e+06	1.02633e+06	1.48736e+06	10563.3	159124	10563.3	1.91255e+06	1.72129e+06	3.44786e+06	10563.3	765249	10563.3	10563.3	10563.3
Pm20d1	Q8C165	N-fatty-acyl-amino acid synthase/hydrolase PM20D1 OS=Mus musculus OX=10090 GN=Pm20d1 PE=1 SV=1	6.42583e+07	6.8423e+07	4.29946e+07	3.35737e+07	2.72582e+07	3.83571e+07	2.74853e+07	2.81455e+07	3.95475e+07	5.4425e+07	4.88316e+07	4.56671e+07	6.56143e+06	7.5851e+06	2.50833e+06	5.46025e+06	5.25708e+06
Pmm2	Q9Z2M7	Phosphomannomutase 2 OS=Mus musculus OX=10090 GN=Pmm2 PE=1 SV=1	1.82712e+06	1.96252e+06	1.92614e+06	10563.3	990051	831898	947574	501152	1.14388e+06	3.50355e+06	1.24289e+06	601309	5.00319e+06	3.19353e+06	3.95452e+06	5.49009e+06	4.95386e+06
Pnp	P23492	Purine nucleoside phosphorylase OS=Mus musculus OX=10090 GN=Pnp PE=1 SV=2	7.01626e+07	1.19513e+08	8.13333e+07	6.34983e+07	1.8441e+08	3.96556e+07	4.44901e+07	5.75269e+07	5.5854e+07	6.3634e+07	6.36695e+07	2.4586e+07	3.22542e+07	3.05326e+07	2.78936e+07	3.98657e+07	5.96216e+07
Pnpo	Q91XF0	Pyridoxine-5'-phosphate oxidase OS=Mus musculus OX=10090 GN=Pnpo PE=1 SV=1	10563.3	10563.3	10563.3	10563.3	10563.3	10563.3	10563.3	10563.3	10563.3	10563.3	10563.3	10563.3	226701	342355	10563.3	509196	270408
Poglut2	Q9JHP7	Protein O-glucosyltransferase 2 OS=Mus musculus OX=10090 GN=Poglut2 PE=1 SV=1	10563.3	10563.3	10563.3	10563.3	10563.3	10563.3	10563.3	10563.3	10563.3	10563.3	10563.3	10563.3	10563.3	10563.3	10563.3	253873	353523
Pon1	P52430	Serum paraoxonase/arylesterase 1 OS=Mus musculus OX=10090 GN=Pon1 PE=1 SV=2	5.39232e+09	6.15029e+09	5.32496e+09	5.58823e+09	5.19409e+09	3.94126e+09	3.8632e+09	5.15128e+09	3.1995e+09	3.26282e+09	6.52923e+09	6.46762e+09	4.52297e+09	3.55351e+09	2.57415e+09	4.23972e+09	4.04256e+09
Pon3	Q62087	Serum paraoxonase/lactonase 3 OS=Mus musculus OX=10090 GN=Pon3 PE=1 SV=2	5.36617e+06	5.66359e+06	3.36119e+06	3.59684e+06	4.60906e+06	3.1528e+06	2.59528e+06	5.78032e+06	2.58639e+06	2.6036e+06	6.15605e+06	3.58506e+06	5.76897e+06	4.2982e+06	2.11291e+06	8.50024e+06	5.59055e+06
Por	P37040	NADPH--cytochrome P450 reductase OS=Mus musculus OX=10090 GN=Por PE=1 SV=2	10563.3	10563.3	10563.3	10563.3	10563.3	10563.3	10563.3	10563.3	10563.3	10563.3	10563.3	10563.3	2.60722e+06	5.86893e+06	10563.3	1.67794e+06	6.12349e+06
Postn	Q62009	Periostin OS=Mus musculus OX=10090 GN=Postn PE=1 SV=2	6.22791e+07	6.0117e+07	8.19423e+07	7.91636e+07	3.81959e+07	7.16452e+07	8.66483e+07	7.76567e+06	5.76611e+07	1.77017e+08	6.53824e+07	1.382e+07	4.76888e+06	1.52464e+07	4.15495e+06	5.28712e+06	5.45456e+06
Ppa1	Q9D819	Inorganic pyrophosphatase OS=Mus musculus OX=10090 GN=Ppa1 PE=1 SV=1	3.49721e+06	6.03614e+06	8.48998e+06	4.90901e+06	5.54952e+06	8.61213e+06	5.22812e+06	1.0939e+06	3.76112e+06	7.25426e+06	3.81394e+06	4.8137e+06	8.79599e+06	9.4237e+06	1.29351e+07	1.38051e+07	8.63513e+06
Ppia	P17742	Peptidyl-prolyl cis-trans isomerase A OS=Mus musculus OX=10090 GN=Ppia PE=1 SV=2	4.41239e+06	6.25078e+06	1.36009e+07	2.92006e+07	3.40291e+06	1.07448e+07	1.08199e+07	1.52784e+06	9.19914e+06	9.93476e+06	1.78178e+07	1.07851e+07	3.76719e+06	2.15652e+06	1.02985e+07	5.05379e+06	6.21575e+06
Ppib	P24369	Peptidyl-prolyl cis-trans isomerase B OS=Mus musculus OX=10090 GN=Ppib PE=1 SV=2	2.25917e+06	1.91886e+06	2.24468e+06	3.4226e+06	1.80049e+06	1.86966e+06	5.27588e+06	4.14225e+06	5.02071e+06	1.43334e+06	5.31109e+06	1.53561e+06	933476	1.2478e+06	4.12856e+06	1.4105e+06	1.03694e+06
Ppic	P30412	Peptidyl-prolyl cis-trans isomerase C OS=Mus musculus OX=10090 GN=Ppic PE=1 SV=1	1.85576e+07	1.94917e+07	2.23062e+07	2.33257e+07	1.66341e+07	2.08398e+07	1.59812e+07	2.27146e+07	1.06066e+07	9.07939e+06	1.96412e+07	1.95141e+07	3.00019e+07	1.78482e+07	1.55349e+07	3.09492e+07	2.95783e+07
Ppm1a	P49443	Protein phosphatase 1A OS=Mus musculus OX=10090 GN=Ppm1a PE=1 SV=1	10563.3	10563.3	10563.3	10563.3	10563.3	10563.3	10563.3	10563.3	10563.3	10563.3	10563.3	10563.3	3.35436e+06	2.91265e+06	3.67258e+06	2.80069e+06	5.38688e+06
Ppm1b	P36993	Protein phosphatase 1B OS=Mus musculus OX=10090 GN=Ppm1b PE=1 SV=1	284413	636883	636265	670026	1.85029e+06	572715	916695	3.61902e+06	502391	411637	3.95733e+06	597667	4.76294e+06	5.07562e+06	1.66974e+06	5.31431e+06	1.17544e+07
Ppm1f	Q8CGA0	Protein phosphatase 1F OS=Mus musculus OX=10090 GN=Ppm1f PE=1 SV=1	508318	606084	473079	10563.3	10563.3	440793	626750	10563.3	536206	10563.3	504008	658933	10563.3	10563.3	10563.3	10563.3	10563.3
Ppp1ca	P62137	Serine/threonine-protein phosphatase PP1-alpha catalytic subunit OS=Mus musculus OX=10090 GN=Ppp1ca PE=1 SV=1	1.51124e+07	1.49739e+07	2.03947e+07	1.95568e+07	1.63232e+07	1.3611e+07	8.66531e+06	3.25275e+06	9.71216e+06	1.08474e+07	1.43234e+07	7.97724e+06	5.99889e+06	5.38644e+06	3.69702e+06	5.98769e+06	1.07844e+07
Ppp1cb	P62141	Serine/threonine-protein phosphatase PP1-beta catalytic subunit OS=Mus musculus OX=10090 GN=Ppp1cb PE=1 SV=3	690735	1.31401e+06	586725	1.33877e+06	1.39421e+06	1.07303e+06	926145	540719	622206	649700	1.21355e+06	507943	1.21497e+06	10563.3	470431	1.13309e+06	1.99449e+06
Ppp1r13b	Q62415	Apoptosis-stimulating of p53 protein 1 OS=Mus musculus OX=10090 GN=Ppp1r13b PE=1 SV=2	783453	826827	612740	1.36901e+06	1.18269e+06	1.7262e+06	870838	1.44225e+06	881780	661297	604290	604921	10563.3	10563.3	10563.3	10563.3	10563.3
Ppp1r14a	Q91VC7	Protein phosphatase 1 regulatory subunit 14A OS=Mus musculus OX=10090 GN=Ppp1r14a PE=1 SV=1	431174	274792	10563.3	395656	234704	10563.3	329454	10563.3	489956	10563.3	350176	10563.3	10563.3	10563.3	10563.3	10563.3	10563.3
Ppp1r7	Q3UM45	Protein phosphatase 1 regulatory subunit 7 OS=Mus musculus OX=10090 GN=Ppp1r7 PE=1 SV=2	7.77227e+06	5.40824e+06	3.0551e+06	4.37311e+06	3.83613e+06	2.65992e+06	4.08387e+06	7.93368e+06	499468	1.32267e+06	2.29628e+06	1.72952e+06	4.02139e+06	3.28341e+06	3.38683e+06	4.53268e+06	8.18593e+06
Ppp2ca	P63330	Serine/threonine-protein phosphatase 2A catalytic subunit alpha isoform OS=Mus musculus OX=10090 GN=Ppp2ca PE=1 SV=1	10563.3	10563.3	10563.3	10563.3	10563.3	10563.3	10563.3	10563.3	10563.3	10563.3	10563.3	10563.3	2.57868e+06	860179	2.64044e+06	2.69117e+06	3.78312e+06
Ppp2cb	P62715	Serine/threonine-protein phosphatase 2A catalytic subunit beta isoform OS=Mus musculus OX=10090 GN=Ppp2cb PE=1 SV=1	3.27653e+06	6.05908e+06	4.65127e+06	4.02836e+06	4.07072e+06	3.46315e+06	2.66588e+06	784146	1.81617e+06	2.89107e+06	5.7927e+06	2.88866e+06	10563.3	10563.3	10563.3	10563.3	10563.3
Ppp2r1a	Q76MZ3	Serine/threonine-protein phosphatase 2A 65 kDa regulatory subunit A alpha isoform OS=Mus musculus OX=10090 GN=Ppp2r1a PE=1 SV=3	5.27485e+06	1.82651e+07	1.43784e+07	1.68108e+07	2.25653e+07	5.02828e+06	4.97831e+06	3.85325e+06	2.54589e+06	9.4123e+06	1.52309e+07	2.93933e+06	3.40899e+06	9.55576e+06	4.51843e+06	3.99665e+06	9.62132e+06
Ppp3ca	P63328	Serine/threonine-protein phosphatase 2B catalytic subunit alpha isoform OS=Mus musculus OX=10090 GN=Ppp3ca PE=1 SV=1	1.13784e+06	549449	1.122e+06	8.84837e+06	1.34975e+06	2.68299e+06	2.02917e+06	454647	291345	1.84468e+06	1.59834e+06	10563.3	10563.3	10563.3	10563.3	10563.3	10563.3
Prap1	Q80XD8	Proline-rich acidic protein 1 OS=Mus musculus OX=10090 GN=Prap1 PE=2 SV=1	3.17012e+06	2.73745e+06	493320	1.49731e+06	2.39175e+06	1.29823e+06	1.29069e+06	3.14899e+06	1.10919e+06	5.24759e+06	2.73962e+06	725576	3.15325e+06	2.27538e+06	7.0075e+06	4.27815e+06	9.51231e+06
Prcp	Q7TMR0	Lysosomal Pro-X carboxypeptidase OS=Mus musculus OX=10090 GN=Prcp PE=1 SV=2	10563.3	10563.3	10563.3	704364	10563.3	10563.3	10563.3	10563.3	417338	184907	10563.3	10563.3	10563.3	10563.3	10563.3	10563.3	10563.3
Prdx1	P35700	Peroxiredoxin-1 OS=Mus musculus OX=10090 GN=Prdx1 PE=1 SV=1	4.87952e+06	6.71203e+06	6.206e+06	1.00987e+07	1.08218e+07	4.34443e+06	6.90524e+06	8.1463e+06	6.45291e+06	7.35019e+06	1.38769e+07	2.68873e+06	6.13198e+06	7.44341e+06	4.22525e+06	8.45243e+06	1.18489e+07
Prdx2	Q61171	Peroxiredoxin-2 OS=Mus musculus OX=10090 GN=Prdx2 PE=1 SV=3	6.00198e+07	7.90508e+07	7.19426e+07	3.70464e+07	1.19257e+08	2.94362e+07	2.53305e+07	1.97155e+07	2.78301e+07	5.09861e+07	1.1019e+08	3.05152e+07	2.75259e+07	2.57736e+07	2.73747e+07	4.91721e+07	3.06303e+07
Prdx3	P20108	Thioredoxin-dependent peroxide reductase, mitochondrial OS=Mus musculus OX=10090 GN=Prdx3 PE=1 SV=1	1.3911e+06	4.10332e+06	5.8197e+06	6.00796e+06	5.77248e+06	7.3638e+06	1.02577e+07	7.01855e+06	1.22136e+07	1.14711e+07	6.63303e+06	6.17277e+06	9.61643e+06	1.2224e+07	6.89721e+06	5.39066e+06	1.89864e+06
Prdx4	O08807	Peroxiredoxin-4 OS=Mus musculus OX=10090 GN=Prdx4 PE=1 SV=1	4.37798e+06	3.83658e+06	2.82714e+06	6.84856e+06	5.24438e+06	4.08165e+06	9.25951e+06	1.15552e+07	1.27341e+07	9.30813e+06	1.00628e+07	5.22097e+06	1.19742e+07	2.47638e+08	1.50684e+07	1.35233e+08	1.59156e+07
Prdx5	P99029	Peroxiredoxin-5, mitochondrial OS=Mus musculus OX=10090 GN=Prdx5 PE=1 SV=2	317977	458447	355837	1.96427e+06	259145	10563.3	222600	134467	385100	451625	326506	10563.3	375189	10563.3	2.43548e+06	10563.3	279132
Prdx6	O08709	Peroxiredoxin-6 OS=Mus musculus OX=10090 GN=Prdx6 PE=1 SV=3	623575	307087	444954	1.17761e+06	2.20613e+06	237702	1.07603e+06	372527	2.36456e+06	1.50389e+06	4.53885e+06	599268	1.07289e+06	891723	1.15175e+06	348898	726324
Prelp	Q9JK53	Prolargin OS=Mus musculus OX=10090 GN=Prelp PE=1 SV=2	573016	784847	10563.3	229743	528664	269738	10563.3	592806	10563.3	10563.3	10563.3	10563.3	10563.3	10563.3	10563.3	10563.3	10563.3
Prep	Q9QUR6	Prolyl endopeptidase OS=Mus musculus OX=10090 GN=Prep PE=1 SV=1	10563.3	10563.3	10563.3	10563.3	10563.3	10563.3	10563.3	10563.3	10563.3	10563.3	10563.3	10563.3	4.30073e+06	2.06741e+06	3.06408e+06	5.72955e+06	4.61892e+06
Prg2	Q61878	Bone marrow proteoglycan OS=Mus musculus OX=10090 GN=Prg2 PE=1 SV=1	237350	10563.3	380127	218292	386561	511362	10563.3	980772	10563.3	2.20011e+06	509004	354096	10563.3	10563.3	10563.3	10563.3	10563.3
Prg4	Q9JM99	Proteoglycan 4 OS=Mus musculus OX=10090 GN=Prg4 PE=1 SV=2	1.07611e+09	1.15041e+09	1.27252e+09	8.05134e+08	7.63401e+08	8.33401e+08	1.36785e+09	1.75513e+08	8.76156e+08	1.02697e+09	4.52773e+08	4.10206e+08	9.99844e+06	6.19131e+06	3.57366e+06	1.45787e+07	4.46336e+06
Prkaca	P05132	cAMP-dependent protein kinase catalytic subunit alpha OS=Mus musculus OX=10090 GN=Prkaca PE=1 SV=3	10563.3	10563.3	10563.3	10563.3	10563.3	10563.3	10563.3	10563.3	10563.3	10563.3	10563.3	10563.3	657193	334328	10563.3	635630	1.35685e+06
Prkacb	P68181	cAMP-dependent protein kinase catalytic subunit beta OS=Mus musculus OX=10090 GN=Prkacb PE=1 SV=2	366860	999226	1.11107e+06	1.16831e+06	779127	10563.3	423208	10563.3	290906	715119	1.01795e+06	10563.3	10563.3	10563.3	10563.3	10563.3	10563.3
Prkar1a	Q9DBC7	cAMP-dependent protein kinase type I-alpha regulatory subunit OS=Mus musculus OX=10090 GN=Prkar1a PE=1 SV=3	10563.3	10563.3	10563.3	10563.3	10563.3	10563.3	10563.3	10563.3	10563.3	10563.3	10563.3	10563.3	281806	10563.3	10563.3	195034	1.41601e+06
Prkar2b	P31324	cAMP-dependent protein kinase type II-beta regulatory subunit OS=Mus musculus OX=10090 GN=Prkar2b PE=1 SV=3	2.06179e+06	5.42202e+06	5.21064e+06	4.7725e+06	2.50931e+06	1.97336e+06	3.90373e+06	3.70411e+06	4.26523e+06	2.17681e+06	6.45462e+06	1.43279e+06	1.63883e+06	10563.3	10563.3	1.64831e+06	4.49601e+06
Prkca	P20444	Protein kinase C alpha type OS=Mus musculus OX=10090 GN=Prkca PE=1 SV=3	882977	2.18275e+06	3.54966e+06	3.4284e+06	2.21377e+06	1.90672e+06	895818	201752	1.12667e+06	1.71455e+06	4.76028e+06	1.11301e+06	454370	10563.3	10563.3	596106	1.14471e+06
Prkcb	P68404	Protein kinase C beta type OS=Mus musculus OX=10090 GN=Prkcb PE=1 SV=4	234943	1.33524e+06	10563.3	524702	10563.3	10563.3	10563.3	10563.3	10563.3	10563.3	10563.3	10563.3	10563.3	10563.3	10563.3	10563.3	10563.3
Prkcd	P28867	Protein kinase C delta type OS=Mus musculus OX=10090 GN=Prkcd PE=1 SV=3	10563.3	10563.3	10563.3	10563.3	10563.3	10563.3	10563.3	10563.3	10563.3	10563.3	10563.3	10563.3	10563.3	10563.3	10563.3	10563.3	230632
Prkcsh	O08795	Glucosidase 2 subunit beta OS=Mus musculus OX=10090 GN=Prkcsh PE=1 SV=1	7.52198e+06	1.16853e+07	1.08361e+07	1.35723e+07	8.90941e+06	9.45382e+06	1.13439e+07	1.42754e+07	1.2576e+07	2.13009e+07	1.57832e+07	9.26036e+06	6.24921e+06	1.08553e+07	2.6864e+06	5.4839e+06	1.40897e+07
Prl	P06879	Prolactin OS=Mus musculus OX=10090 GN=Prl PE=2 SV=1	5.39271e+06	901160	3.33628e+06	550745	6.09936e+06	3.27416e+06	1.06232e+06	1.45337e+06	954887	1.85875e+06	74122.6	1.41311e+06	10563.3	10563.3	10563.3	10563.3	10563.3
Proc	P33587	Vitamin K-dependent protein C OS=Mus musculus OX=10090 GN=Proc PE=1 SV=2	1.69233e+08	1.39204e+08	1.71431e+08	1.74202e+08	2.77648e+08	1.4877e+08	8.67918e+07	1.29252e+08	9.01934e+07	8.36955e+07	1.62704e+08	9.43935e+07	2.2416e+08	1.81153e+08	1.28795e+08	2.88872e+08	3.97327e+08
Procr	Q64695	Endothelial protein C receptor OS=Mus musculus OX=10090 GN=Procr PE=1 SV=3	677651	4.0673e+06	4.26542e+06	5.89619e+06	3.54263e+06	4.75873e+06	4.36955e+06	2.03e+06	4.94493e+06	10563.3	5.03337e+06	4.51203e+06	722287	632214	464218	713719	905295
Pros1	Q08761	Vitamin K-dependent protein S OS=Mus musculus OX=10090 GN=Pros1 PE=2 SV=1	2.34764e+08	2.62117e+08	1.13182e+08	1.25946e+08	1.26914e+08	9.8383e+07	8.20277e+07	5.34547e+07	8.64413e+07	1.00344e+08	7.42508e+07	6.50651e+07	9.47664e+07	1.01599e+08	6.7045e+07	1.31921e+08	2.70634e+08
Proz	Q9CQW3	Vitamin K-dependent protein Z OS=Mus musculus OX=10090 GN=Proz PE=1 SV=1	5.57022e+06	9.25012e+06	9.86502e+06	1.40824e+07	1.44023e+07	1.07957e+07	1.84287e+07	1.76285e+07	1.02767e+07	5.52915e+06	5.93665e+06	8.84248e+06	1.42516e+07	9.22165e+06	3.18357e+07	1.21894e+07	8.7027e+06
Prps1	Q9D7G0	Ribose-phosphate pyrophosphokinase 1 OS=Mus musculus OX=10090 GN=Prps1 PE=1 SV=4	1.55978e+06	2.56402e+06	2.62197e+06	1.47232e+06	3.80629e+06	820701	2.4634e+06	165719	2.19789e+06	1.69449e+06	3.6784e+06	945687	10563.3	10563.3	10563.3	10563.3	10563.3
Prrc1	Q3UPH1	Protein PRRC1 OS=Mus musculus OX=10090 GN=Prrc1 PE=1 SV=1	1.28636e+06	703995	1.41848e+06	1.36617e+06	1.00659e+06	2.60203e+06	5.4906e+06	7.68429e+06	1.04961e+06	1.49614e+06	1.69936e+06	2.38139e+06	4.70253e+06	4.88052e+06	1.28348e+06	5.17033e+06	8.4727e+06
Prss2	P07146	Anionic trypsin-2 OS=Mus musculus OX=10090 GN=Prss2 PE=1 SV=1	10563.3	928478	770417	693129	1.05099e+06	10563.3	1.88188e+06	2.01839e+06	2.19948e+06	2.59648e+06	4.93305e+06	1.08795e+06	1.92361e+06	2.10924e+06	1.61426e+06	2.48148e+06	2.98238e+06
Prtn3	Q61096	Myeloblastin OS=Mus musculus OX=10090 GN=Prtn3 PE=1 SV=2	10563.3	10563.3	10563.3	10563.3	10563.3	10563.3	10563.3	10563.3	4.45393e+06	444906	10563.3	10563.3	10563.3	10563.3	10563.3	10563.3	10563.3
Prune1	Q8BIW1	Exopolyphosphatase PRUNE1 OS=Mus musculus OX=10090 GN=Prune1 PE=1 SV=1	551278	2.82011e+06	1.67312e+06	1.90833e+06	466291	6.52901e+06	9.60393e+06	256013	3.62083e+06	1.13483e+07	5.22846e+06	2.01112e+06	10563.3	758281	10563.3	1.78739e+06	1.92929e+06
Psap	Q61207	Prosaposin OS=Mus musculus OX=10090 GN=Psap PE=1 SV=2	2.71955e+08	3.94316e+08	4.17647e+08	5.3349e+08	4.76143e+08	5.43976e+08	5.14633e+08	2.85641e+08	4.64299e+08	3.56162e+08	5.70009e+08	2.83938e+08	4.61282e+08	3.52245e+08	3.90333e+08	3.96708e+08	4.85582e+08
Psapl1	Q8C1C1	Proactivator polypeptide-like 1 OS=Mus musculus OX=10090 GN=Psapl1 PE=1 SV=2	874245	10563.3	1.30401e+06	2.66627e+06	1.3802e+07	10563.3	2.23336e+06	2.80005e+08	509974	2.79204e+06	1.11011e+06	1.97701e+06	10563.3	10563.3	10563.3	10563.3	10563.3
Psma1	Q9R1P4	Proteasome subunit alpha type-1 OS=Mus musculus OX=10090 GN=Psma1 PE=1 SV=1	2.08232e+08	2.27246e+08	3.37854e+08	2.74883e+08	3.14639e+08	3.71216e+08	2.14586e+08	3.86171e+08	2.39569e+08	3.66519e+08	3.44852e+08	3.22548e+08	6.24375e+08	7.67197e+08	2.7737e+08	7.89028e+08	1.01174e+09
Psma2	P49722	Proteasome subunit alpha type-2 OS=Mus musculus OX=10090 GN=Psma2 PE=1 SV=3	8.56576e+07	1.43307e+08	2.05972e+08	2.03066e+08	1.81886e+08	2.29256e+08	1.19461e+08	3.07271e+08	1.1837e+08	1.95612e+08	2.06553e+08	1.54345e+08	2.41619e+08	2.81333e+08	1.24917e+08	3.00756e+08	4.47305e+08
Psma3	O70435	Proteasome subunit alpha type-3 OS=Mus musculus OX=10090 GN=Psma3 PE=1 SV=3	1.96625e+08	2.1597e+08	3.17896e+08	3.0165e+08	2.75627e+08	3.5951e+08	1.99517e+08	3.87198e+08	2.05408e+08	4.16396e+08	3.263e+08	3.38021e+08	5.06893e+08	6.06645e+08	2.52702e+08	6.79103e+08	8.13711e+08
Psma4	Q9R1P0	Proteasome subunit alpha type-4 OS=Mus musculus OX=10090 GN=Psma4 PE=1 SV=1	1.51267e+08	1.58456e+08	2.64772e+08	2.37824e+08	2.55554e+08	3.04083e+08	2.13833e+08	2.55792e+08	2.58146e+08	3.25679e+08	3.23969e+08	2.8665e+08	4.49579e+08	5.48288e+08	2.10955e+08	5.81513e+08	8.1754e+08
Psma5	Q9Z2U1	Proteasome subunit alpha type-5 OS=Mus musculus OX=10090 GN=Psma5 PE=1 SV=1	1.28547e+08	1.25411e+08	1.96214e+08	1.82498e+08	2.24544e+08	2.21673e+08	1.37603e+08	2.60927e+08	1.4479e+08	2.17529e+08	2.23661e+08	2.02436e+08	3.28797e+08	3.51156e+08	1.50776e+08	4.47519e+08	5.59623e+08
Psma6	Q9QUM9	Proteasome subunit alpha type-6 OS=Mus musculus OX=10090 GN=Psma6 PE=1 SV=1	9.05649e+08	1.06413e+09	1.10678e+09	1.10224e+09	1.12425e+09	9.3781e+08	8.22789e+08	1.38069e+09	7.39058e+08	9.85974e+08	1.32494e+09	1.31118e+09	4.69091e+08	5.61226e+08	2.19272e+08	6.62412e+08	7.98599e+08
Psma7	Q9Z2U0	Proteasome subunit alpha type-7 OS=Mus musculus OX=10090 GN=Psma7 PE=1 SV=1	2.13473e+08	2.16685e+08	3.24251e+08	2.9608e+08	3.75193e+08	4.07378e+08	2.63092e+08	4.93488e+08	3.33659e+08	3.97081e+08	4.09061e+08	3.9605e+08	5.27502e+08	5.91972e+08	2.43652e+08	6.98435e+08	9.315e+08
Psmb1	O09061	Proteasome subunit beta type-1 OS=Mus musculus OX=10090 GN=Psmb1 PE=1 SV=1	2.86122e+08	3.39675e+08	3.55148e+08	3.57354e+08	3.97895e+08	3.84332e+08	2.49747e+08	3.90752e+08	2.66641e+08	3.95653e+08	3.51051e+08	3.75153e+08	3.77028e+08	4.16953e+08	1.75071e+08	4.80548e+08	5.99211e+08
Psmb10	O35955	Proteasome subunit beta type-10 OS=Mus musculus OX=10090 GN=Psmb10 PE=1 SV=1	3.09728e+07	3.81214e+07	8.86287e+07	8.24554e+07	7.52481e+07	1.02269e+08	5.2201e+07	4.59317e+07	5.39237e+07	8.79691e+07	5.27956e+07	6.04241e+07	6.39282e+07	1.10708e+08	7.93531e+07	1.32737e+08	9.41078e+07
Psmb2	Q9R1P3	Proteasome subunit beta type-2 OS=Mus musculus OX=10090 GN=Psmb2 PE=1 SV=1	1.70464e+08	1.83904e+08	2.53334e+08	2.64391e+08	2.73387e+08	2.8902e+08	2.54658e+08	2.98951e+08	2.56326e+08	3.56185e+08	3.7306e+08	3.37611e+08	2.85019e+08	3.05756e+08	1.13054e+08	3.94668e+08	4.68679e+08
Psmb3	Q9R1P1	Proteasome subunit beta type-3 OS=Mus musculus OX=10090 GN=Psmb3 PE=1 SV=1	9.24999e+07	9.68505e+07	1.56573e+08	1.4843e+08	1.44359e+08	1.84468e+08	9.53457e+07	1.92814e+08	1.0818e+08	1.78615e+08	1.78614e+08	1.6249e+08	2.72527e+08	2.95006e+08	1.26195e+08	3.24477e+08	4.0826e+08
Psmb4	P99026	Proteasome subunit beta type-4 OS=Mus musculus OX=10090 GN=Psmb4 PE=1 SV=1	1.16897e+08	1.19717e+08	1.76795e+08	1.48779e+08	1.70315e+08	1.99196e+08	1.03677e+08	2.56265e+08	1.05095e+08	1.79606e+08	1.57102e+08	1.71744e+08	3.55699e+08	3.88579e+08	1.57044e+08	4.9424e+08	5.35818e+08
Psmb5	O55234	Proteasome subunit beta type-5 OS=Mus musculus OX=10090 GN=Psmb5 PE=1 SV=3	7.88206e+07	9.92592e+07	1.114e+08	8.89212e+07	1.13116e+08	1.06573e+08	6.94261e+07	2.3113e+08	4.58665e+07	1.07266e+08	1.62168e+08	1.29226e+08	3.54845e+08	3.17269e+08	8.0978e+07	3.70924e+08	5.66436e+08
Psmb6	Q60692	Proteasome subunit beta type-6 OS=Mus musculus OX=10090 GN=Psmb6 PE=1 SV=3	5.98492e+08	4.78863e+08	6.06363e+08	5.07082e+08	6.02716e+08	5.99583e+08	4.13123e+08	6.04674e+08	2.632e+08	5.15521e+08	6.15459e+08	5.34652e+08	2.48012e+08	2.48418e+08	5.93034e+07	2.84934e+08	3.94474e+08
Psmb7	P70195	Proteasome subunit beta type-7 OS=Mus musculus OX=10090 GN=Psmb7 PE=1 SV=1	6.23179e+07	7.79381e+07	9.75917e+07	8.10193e+07	1.00343e+08	1.07151e+08	5.81538e+07	1.81238e+08	7.08182e+07	1.0093e+08	1.38434e+08	1.21703e+08	2.51031e+08	2.45478e+08	7.88978e+07	3.0586e+08	3.95354e+08
Psmb8	P28063	Proteasome subunit beta type-8 OS=Mus musculus OX=10090 GN=Psmb8 PE=1 SV=2	8.35042e+07	7.65977e+07	1.17197e+08	1.06643e+08	1.21193e+08	1.30271e+08	7.39011e+07	1.24105e+08	1.00322e+08	1.44399e+08	8.62275e+07	1.00254e+08	1.40034e+08	1.94788e+08	1.15662e+08	2.50163e+08	2.00802e+08
Psmb9	O35522	Proteasome subunit beta type-9 OS=Mus musculus bactrianus OX=35531 GN=Psmb9 PE=1 SV=1	1.39947e+07	2.32386e+07	6.30909e+07	7.11913e+07	4.98148e+07	8.50412e+07	4.01413e+07	3.11187e+07	4.71187e+07	7.91471e+07	4.07619e+07	4.11003e+07	4.82977e+07	8.86554e+07	5.58743e+07	1.12134e+08	8.73094e+07
Psmc1	P62192	26S proteasome regulatory subunit 4 OS=Mus musculus OX=10090 GN=Psmc1 PE=1 SV=1	379707	1.55566e+06	589611	577476	1.02506e+06	369306	10563.3	10563.3	10563.3	10563.3	853120	10563.3	10563.3	10563.3	351321	759994	511288
Psmc2	P46471	26S proteasome regulatory subunit 7 OS=Mus musculus OX=10090 GN=Psmc2 PE=1 SV=5	2.43622e+06	5.16898e+06	4.91046e+06	1.64979e+06	5.88882e+06	10563.3	5.49314e+06	2.77557e+06	8.89112e+06	4.548e+06	2.4882e+06	3.00551e+06	10563.3	10563.3	10563.3	10563.3	10563.3
Psmc3	O88685	26S proteasome regulatory subunit 6A OS=Mus musculus OX=10090 GN=Psmc3 PE=1 SV=2	1.00944e+06	1.96088e+06	1.97824e+06	1.397e+06	3.84724e+06	213634	655006	10563.3	10563.3	697977	1.91824e+06	10563.3	2.29055e+06	1.99608e+06	1.64343e+06	1.74261e+06	2.08327e+06
Psmc4	P54775	26S proteasome regulatory subunit 6B OS=Mus musculus OX=10090 GN=Psmc4 PE=1 SV=2	10563.3	1.25718e+06	1.00455e+06	196384	1.22799e+06	432719	10563.3	10563.3	10563.3	10563.3	209969	10563.3	10563.3	10563.3	10563.3	10563.3	10563.3
Psmc5	P62196	26S proteasome regulatory subunit 8 OS=Mus musculus OX=10090 GN=Psmc5 PE=1 SV=1	634037	860560	1.06946e+06	617793	2.08983e+06	10563.3	10563.3	10563.3	10563.3	10563.3	10563.3	10563.3	645602	387466	320636	351324	560346
Psmc6	P62334	26S proteasome regulatory subunit 10B OS=Mus musculus OX=10090 GN=Psmc6 PE=1 SV=1	490944	2.09132e+06	3.60578e+06	2.9835e+06	1.90573e+06	2.66093e+06	4.15206e+06	10563.3	2.69492e+06	5.99528e+06	5.46609e+06	3.58625e+06	260934	276239	10563.3	355443	559700
Psmd1	Q3TXS7	26S proteasome non-ATPase regulatory subunit 1 OS=Mus musculus OX=10090 GN=Psmd1 PE=1 SV=1	915046	1.0592e+06	1.70865e+06	1.32568e+06	4.40165e+06	10563.3	1.71986e+06	73264.9	1.71232e+06	1.65351e+06	1.49093e+06	10563.3	10563.3	10563.3	10563.3	10563.3	438403
Psmd11	Q8BG32	26S proteasome non-ATPase regulatory subunit 11 OS=Mus musculus OX=10090 GN=Psmd11 PE=1 SV=3	2.04947e+06	3.75496e+06	5.38809e+06	3.985e+06	1.09448e+07	2.70681e+06	2.35663e+06	1.14518e+06	1.55142e+06	3.25795e+06	5.69335e+06	1.40419e+06	272319	337061	10563.3	205022	595410
Psmd12	Q9D8W5	26S proteasome non-ATPase regulatory subunit 12 OS=Mus musculus OX=10090 GN=Psmd12 PE=1 SV=4	1.56373e+06	6.03779e+06	3.52708e+06	5.43867e+06	1.53782e+07	3.04513e+06	4.26412e+06	797311	2.59358e+06	4.77785e+06	5.89366e+06	1.1509e+06	10563.3	679589	10563.3	10563.3	667270
Psmd13	Q9WVJ2	26S proteasome non-ATPase regulatory subunit 13 OS=Mus musculus OX=10090 GN=Psmd13 PE=1 SV=1	2.24877e+06	2.64479e+06	2.58334e+06	1.77877e+06	7.66154e+06	328934	3.47102e+06	978410	2.20852e+06	3.39449e+06	4.66079e+06	2.36818e+06	10563.3	10563.3	10563.3	10563.3	500074
Psmd14	O35593	26S proteasome non-ATPase regulatory subunit 14 OS=Mus musculus OX=10090 GN=Psmd14 PE=1 SV=2	229968	307258	353824	366289	1.59201e+06	10563.3	282455	288886	202032	348410	995179	10563.3	388795	393646	10563.3	493076	732242
Psmd2	Q8VDM4	26S proteasome non-ATPase regulatory subunit 2 OS=Mus musculus OX=10090 GN=Psmd2 PE=1 SV=1	2.72734e+06	5.45492e+06	6.92114e+06	4.50917e+06	1.01743e+07	1.72179e+06	2.51766e+06	2.61249e+06	1.38344e+06	2.26936e+06	5.07785e+06	704359	1.31345e+06	1.01841e+06	143535	1.76362e+06	4.95331e+06
Psmd3	P14685	26S proteasome non-ATPase regulatory subunit 3 OS=Mus musculus OX=10090 GN=Psmd3 PE=1 SV=3	1.8747e+07	6.10792e+06	1.05326e+07	2.58299e+07	5.71398e+07	1.53462e+07	4.70608e+07	1.91799e+06	7.93201e+07	1.01858e+07	1.01747e+07	5.29143e+06	855663	1.67819e+06	2.21981e+06	1.61905e+06	3.39241e+06
Psmd4	O35226	26S proteasome non-ATPase regulatory subunit 4 OS=Mus musculus OX=10090 GN=Psmd4 PE=1 SV=1	10563.3	10563.3	10563.3	10563.3	535720	10563.3	10563.3	10563.3	10563.3	10563.3	10563.3	10563.3	10563.3	10563.3	10563.3	10563.3	10563.3
Psmd5	Q8BJY1	26S proteasome non-ATPase regulatory subunit 5 OS=Mus musculus OX=10090 GN=Psmd5 PE=1 SV=4	1.40481e+06	3.92276e+06	2.75095e+06	789071	6.46161e+06	264155	549237	410697	372741	513507	2.19898e+06	803140	365660	10563.3	10563.3	603553	603602
Psmd6	Q99JI4	26S proteasome non-ATPase regulatory subunit 6 OS=Mus musculus OX=10090 GN=Psmd6 PE=1 SV=1	452417	1.18768e+06	1.91857e+06	1.28904e+06	4.37656e+06	524060	250121	10563.3	10563.3	1.05397e+06	1.92635e+06	10563.3	10563.3	10563.3	10563.3	10563.3	10563.3
Psmd7	P26516	26S proteasome non-ATPase regulatory subunit 7 OS=Mus musculus OX=10090 GN=Psmd7 PE=1 SV=2	410604	530685	849686	832602	3.59374e+06	10563.3	10563.3	324332	331855	967179	887936	10563.3	10563.3	10563.3	10563.3	10563.3	10563.3
Psmd8	Q9CX56	26S proteasome non-ATPase regulatory subunit 8 OS=Mus musculus OX=10090 GN=Psmd8 PE=1 SV=2	192340	457029	736449	617074	2.9256e+06	708686	230298	520055	268531	667838	2.45264e+06	10563.3	10563.3	10563.3	10563.3	10563.3	10563.3
Psmd9	Q9CR00	26S proteasome non-ATPase regulatory subunit 9 OS=Mus musculus OX=10090 GN=Psmd9 PE=1 SV=1	2.19385e+07	1.77581e+07	2.75002e+07	1.78891e+07	1.9899e+07	1.45668e+07	1.56774e+07	2.16829e+06	9.1571e+06	1.2628e+07	1.92324e+07	1.26638e+07	10563.3	10563.3	10563.3	10563.3	10563.3
Psme1	P97371	Proteasome activator complex subunit 1 OS=Mus musculus OX=10090 GN=Psme1 PE=1 SV=2	1.85317e+06	3.54398e+06	1.78482e+06	2.83839e+06	4.80015e+06	2.76594e+06	3.50545e+06	6.31768e+06	4.14394e+06	4.17016e+06	4.71423e+06	1.73584e+06	786186	476254	10563.3	1.09069e+06	859976
Psme2	P97372	Proteasome activator complex subunit 2 OS=Mus musculus OX=10090 GN=Psme2 PE=1 SV=4	775412	2.36396e+06	10563.3	984754	1.52974e+06	502347	476292	1.28439e+06	469010	1.48298e+06	1.57772e+06	1.2584e+06	747135	1.46901e+06	598564	1.61128e+06	1.48769e+06
Psme3	P61290	Proteasome activator complex subunit 3 OS=Mus musculus OX=10090 GN=Psme3 PE=1 SV=1	171355	310689	319228	321398	775150	356153	10563.3	256928	10563.3	252439	529015	372228	10563.3	10563.3	10563.3	10563.3	10563.3
Psmf1	Q8BHL8	Proteasome inhibitor PI31 subunit OS=Mus musculus OX=10090 GN=Psmf1 PE=1 SV=1	196246	584302	393231	10563.3	843668	10563.3	10563.3	10563.3	10563.3	10563.3	10563.3	10563.3	10563.3	10563.3	10563.3	10563.3	10563.3
Ptms	Q9D0J8	Parathymosin OS=Mus musculus OX=10090 GN=Ptms PE=1 SV=3	10563.3	10563.3	10563.3	10563.3	10563.3	10563.3	10563.3	10563.3	10563.3	10563.3	10563.3	10563.3	10563.3	10563.3	1.32592e+06	721586	1.36313e+06
Ptpn1	P35821	Tyrosine-protein phosphatase non-receptor type 1 OS=Mus musculus OX=10090 GN=Ptpn1 PE=1 SV=2	10563.3	405134	276342	378653	10563.3	10563.3	165790	10563.3	143414	10563.3	414147	10563.3	9.98412e+07	1.10189e+08	4.82502e+07	9.90999e+07	1.05795e+08
Ptpn11	P35235	Tyrosine-protein phosphatase non-receptor type 11 OS=Mus musculus OX=10090 GN=Ptpn11 PE=1 SV=3	9.96689e+06	1.00594e+07	9.13929e+06	1.23031e+07	1.70511e+07	9.02602e+06	1.03216e+07	1.64165e+07	7.66296e+06	7.8541e+06	8.17139e+06	5.21155e+06	10563.3	10563.3	10563.3	10563.3	10563.3
Ptprk	P35822	Receptor-type tyrosine-protein phosphatase kappa OS=Mus musculus OX=10090 GN=Ptprk PE=1 SV=1	1.32733e+07	1.59456e+07	1.27134e+07	1.16694e+07	1.52265e+07	1.47847e+07	2.33584e+07	2.26437e+06	1.59456e+07	1.24965e+07	3.02682e+07	1.9652e+07	2.05822e+06	1.94682e+06	1.44689e+06	4.93024e+06	7.40203e+06
Pts	Q9R1Z7	6-pyruvoyl tetrahydrobiopterin synthase OS=Mus musculus OX=10090 GN=Pts PE=1 SV=2	337948	700118	497568	411639	616331	257045	10563.3	10563.3	10563.3	237403	583299	10563.3	10563.3	10563.3	10563.3	10563.3	10563.3
Ptx3	P48759	Pentraxin-related protein PTX3 OS=Mus musculus OX=10090 GN=Ptx3 PE=1 SV=2	621036	345562	1.6424e+06	686013	689866	3.0217e+06	1.49617e+06	1.08783e+06	806953	3.16939e+06	810428	700461	2.77418e+06	2.93099e+06	872797	2.38637e+06	2.18729e+06
Pura	P42669	Transcriptional activator protein Pur-alpha OS=Mus musculus OX=10090 GN=Pura PE=1 SV=1	328597	301835	259176	1.12594e+06	445343	10563.3	1.12233e+06	10563.3	1.0991e+06	1.97257e+06	2.29394e+06	10563.3	10563.3	10563.3	10563.3	10563.3	10563.3
Pxdn	Q3UQ28	Peroxidasin homolog OS=Mus musculus OX=10090 GN=Pxdn PE=1 SV=2	3.12833e+06	4.58738e+06	717657	1.50845e+06	2.75348e+06	723367	708639	1.0296e+06	312461	10563.3	210048	10563.3	1.54317e+06	781797	1.2217e+06	1.47949e+06	1.43651e+06
Pygb	Q8CI94	Glycogen phosphorylase, brain form OS=Mus musculus OX=10090 GN=Pygb PE=1 SV=3	9.40928e+06	1.86757e+07	1.47363e+07	1.49954e+07	1.33986e+07	1.24131e+07	6.85361e+06	3.74186e+06	1.20269e+06	6.13468e+06	9.57545e+06	4.01066e+06	7.83726e+06	8.26723e+06	2.64673e+06	7.0581e+06	1.36165e+07
Pygl	Q9ET01	Glycogen phosphorylase, liver form OS=Mus musculus OX=10090 GN=Pygl PE=1 SV=4	1.89626e+07	1.9246e+07	2.54845e+07	2.05583e+07	2.40798e+07	2.60997e+07	2.79816e+07	6.19101e+07	4.11127e+07	2.41476e+07	2.94473e+07	1.81553e+07	1.02544e+08	1.58265e+08	4.04168e+07	1.24864e+08	2.61372e+08
Pygm	Q9WUB3	Glycogen phosphorylase, muscle form OS=Mus musculus OX=10090 GN=Pygm PE=1 SV=3	9.62192e+07	6.64073e+07	2.31427e+08	1.63099e+08	1.86772e+08	2.57346e+08	2.06853e+07	3.38453e+07	1.46872e+07	2.51059e+07	2.64432e+07	1.08433e+07	5.011e+06	3.76262e+06	1.01492e+06	3.13714e+06	6.37253e+06
Pzp	Q61838	Pregnancy zone protein OS=Mus musculus OX=10090 GN=Pzp PE=1 SV=3	1.08256e+10	9.5898e+09	8.34385e+09	9.73109e+09	1.00256e+10	7.48452e+09	8.26402e+09	6.31333e+09	9.74431e+09	5.92926e+09	6.30948e+09	7.45517e+09	7.42718e+09	6.889e+09	1.78392e+10	7.6453e+09	7.64611e+09
Qpct	Q9CYK2	Glutaminyl-peptide cyclotransferase OS=Mus musculus OX=10090 GN=Qpct PE=1 SV=2	2.03589e+07	2.8445e+07	2.16584e+07	2.09914e+07	3.1521e+07	1.15633e+08	6.43272e+07	7.2258e+06	1.06422e+07	1.60634e+07	5.92045e+07	2.39322e+07	2.35051e+07	1.28624e+07	2.42534e+07	2.19262e+07	2.13067e+07
Qprt	Q91X91	Nicotinate-nucleotide pyrophosphorylase [carboxylating] OS=Mus musculus OX=10090 GN=Qprt PE=1 SV=1	2.28421e+06	749660	928642	1.66499e+06	10563.3	1.30906e+06	893602	5.55805e+06	979334	2.41747e+06	1.62534e+06	1.41485e+06	2.68449e+07	3.4402e+07	2.65612e+07	2.79581e+07	1.52907e+07
Qsox1	Q8BND5	Sulfhydryl oxidase 1 OS=Mus musculus OX=10090 GN=Qsox1 PE=1 SV=1	2.40209e+08	3.12341e+08	2.51786e+08	3.25237e+08	2.3729e+08	2.88644e+08	2.81768e+08	1.7099e+08	4.60148e+08	1.54863e+08	2.47575e+08	2.35376e+08	2.05283e+08	1.89663e+08	3.82595e+08	2.08476e+08	1.30718e+08
Qsox2	Q3TMX7	Sulfhydryl oxidase 2 OS=Mus musculus OX=10090 GN=Qsox2 PE=1 SV=1	560878	927756	10563.3	10563.3	261605	490802	10563.3	132849	1.49534e+06	1.30011e+06	442660	328099	248800	10563.3	10563.3	313003	284736
Rab10	P61027	Ras-related protein Rab-10 OS=Mus musculus OX=10090 GN=Rab10 PE=1 SV=1	4.1518e+07	4.178e+07	3.01242e+07	3.28234e+07	4.68435e+07	1.97421e+07	3.45495e+07	2.70807e+07	2.9344e+07	2.68273e+07	3.57965e+07	1.1689e+07	9.33284e+06	7.49168e+06	7.6972e+06	4.61474e+06	1.56362e+07
Rab11b	P46638	Ras-related protein Rab-11B OS=Mus musculus OX=10090 GN=Rab11b PE=1 SV=3	5.46341e+06	1.21429e+07	5.63828e+06	6.40932e+06	6.5712e+06	5.14787e+06	5.90759e+06	3.95959e+06	4.3906e+06	4.74098e+06	9.29391e+06	2.03771e+06	9.14781e+06	6.0372e+06	3.88015e+06	7.53676e+06	9.72945e+06
Rab14	Q91V41	Ras-related protein Rab-14 OS=Mus musculus OX=10090 GN=Rab14 PE=1 SV=3	8.03747e+06	1.83153e+07	1.95366e+07	1.70799e+07	1.00125e+07	1.07221e+07	3.56133e+07	4.45913e+06	2.88951e+07	2.31346e+07	2.00102e+07	7.39419e+06	4.19762e+06	2.20249e+06	1.00603e+06	3.80999e+06	6.95432e+06
Rab18	P35293	Ras-related protein Rab-18 OS=Mus musculus OX=10090 GN=Rab18 PE=1 SV=2	10563.3	158754	10563.3	259496	197037	10563.3	10563.3	10563.3	211207	10563.3	461176	10563.3	495180	186051	10563.3	412454	1.37209e+06
Rab1A	P62821	Ras-related protein Rab-1A OS=Mus musculus OX=10090 GN=Rab1A PE=1 SV=3	6.79511e+06	2.59046e+07	1.29854e+07	2.3243e+07	1.97479e+07	8.56625e+06	1.16026e+07	6.73159e+06	1.10434e+07	1.04339e+07	1.83888e+07	4.57715e+06	9.90702e+06	7.27534e+06	5.32803e+06	1.29106e+07	2.34936e+07
Rab1b	Q9D1G1	Ras-related protein Rab-1B OS=Mus musculus OX=10090 GN=Rab1b PE=1 SV=1	2.48686e+06	572943	1.75394e+06	3.00137e+06	1.53086e+06	1.57753e+06	2.55958e+06	2.54812e+06	2.66023e+06	2.25004e+06	9.58324e+06	6.96793e+06	2.10651e+06	1.65901e+06	10563.3	2.25869e+06	4.04022e+06
Rab27b	Q99P58	Ras-related protein Rab-27B OS=Mus musculus OX=10090 GN=Rab27b PE=1 SV=3	1.03258e+07	8.66338e+06	8.58362e+06	8.80393e+06	5.20508e+06	5.28804e+06	2.0216e+07	2.99122e+06	2.08154e+07	1.92766e+06	8.14132e+06	2.49362e+06	1.37974e+06	10563.3	10563.3	1.48276e+06	5.54026e+06
Rab2a	P53994	Ras-related protein Rab-2A OS=Mus musculus OX=10090 GN=Rab2a PE=1 SV=1	2.36606e+06	3.94803e+06	2.67771e+06	3.63574e+06	3.37413e+06	4.15452e+06	3.28403e+06	3.54231e+06	1.36061e+06	1.72112e+06	3.86799e+06	1.07957e+06	4.06025e+06	2.40668e+06	899305	3.68532e+06	7.82791e+06
Rab5c	P35278	Ras-related protein Rab-5C OS=Mus musculus OX=10090 GN=Rab5c PE=1 SV=2	1.29923e+06	10563.3	2.05011e+06	362516	2.62171e+06	251024	299602	964644	1.3081e+06	1.4289e+06	2.50747e+06	10563.3	2.37018e+06	1.87567e+06	1.31493e+06	2.72378e+06	3.71513e+06
Rab6b	P61294	Ras-related protein Rab-6B OS=Mus musculus OX=10090 GN=Rab6b PE=1 SV=1	528460	2.64906e+06	1.09985e+06	2.9251e+06	1.0876e+06	521909	902739	1.51101e+06	1.27001e+06	1.12813e+06	1.82817e+06	141981	225826	176916	10563.3	178397	488472
Rab7a	P51150	Ras-related protein Rab-7a OS=Mus musculus OX=10090 GN=Rab7a PE=1 SV=2	884256	545903	247602	1.15259e+06	1.0942e+06	333289	317017	383968	1.58089e+06	870283	1.68473e+06	10563.3	259586	10563.3	10563.3	456443	870858
Rab8a	P55258	Ras-related protein Rab-8A OS=Mus musculus OX=10090 GN=Rab8a PE=1 SV=2	3.63759e+06	6.33741e+06	4.76972e+06	3.48988e+06	7.02875e+06	2.54255e+06	4.87078e+06	2.20728e+06	1.72849e+06	3.93027e+06	4.74122e+06	1.58089e+06	1.39038e+06	73320.7	10563.3	1.32775e+06	2.48351e+06
Rab8b	P61028	Ras-related protein Rab-8B OS=Mus musculus OX=10090 GN=Rab8b PE=1 SV=1	10563.3	307485	10563.3	10563.3	275033	10563.3	310692	10563.3	10563.3	10563.3	435086	10563.3	10563.3	10563.3	10563.3	10563.3	10563.3
Rac1	P63001	Ras-related C3 botulinum toxin substrate 1 OS=Mus musculus OX=10090 GN=Rac1 PE=1 SV=1	1.65979e+07	2.16613e+07	2.04374e+07	2.72212e+07	1.6767e+07	1.34763e+07	1.70734e+07	6.58007e+06	1.36894e+07	1.58329e+07	1.81404e+07	8.72782e+06	6.21923e+06	2.43188e+06	3.37565e+06	7.76391e+06	1.18355e+07
Rac2	Q05144	Ras-related C3 botulinum toxin substrate 2 OS=Mus musculus OX=10090 GN=Rac2 PE=1 SV=1	2.44483e+06	2.68828e+06	2.81975e+06	2.92636e+06	2.59916e+06	3.10107e+06	1.60376e+06	1.0175e+06	2.60805e+06	2.44705e+06	2.93706e+06	1.10772e+06	777260	485220	10563.3	1.4562e+06	1.8133e+06
Rack1	P68040	Receptor of activated protein C kinase 1 OS=Mus musculus OX=10090 GN=Rack1 PE=1 SV=3	319902	369084	10563.3	535912	433354	10563.3	399397	10563.3	10563.3	10563.3	406546	10563.3	10563.3	10563.3	10563.3	10563.3	10563.3
Rad23a	P54726	UV excision repair protein RAD23 homolog A OS=Mus musculus OX=10090 GN=Rad23a PE=1 SV=2	1.35621e+06	1.32046e+06	726986	10563.3	3.77177e+06	2.10014e+06	227142	602315	10563.3	2.27131e+06	721963	10563.3	10563.3	10563.3	10563.3	10563.3	10563.3
Rad23b	P54728	UV excision repair protein RAD23 homolog B OS=Mus musculus OX=10090 GN=Rad23b PE=1 SV=2	2.73287e+06	4.53696e+06	3.07201e+06	2.65268e+06	7.41447e+06	1.89946e+06	3.62347e+06	4.1675e+06	1.22579e+06	3.33695e+06	5.22209e+06	788045	1.78585e+06	1.34818e+06	1.16565e+06	2.20999e+06	2.84019e+06
Ralb	Q9JIW9	Ras-related protein Ral-B OS=Mus musculus OX=10090 GN=Ralb PE=1 SV=1	146025	312780	10563.3	508913	225147	10563.3	185171	160723	101276	158556	396102	10563.3	199976	10563.3	162744	164353	424163
Ran	P62827	GTP-binding nuclear protein Ran OS=Mus musculus OX=10090 GN=Ran PE=1 SV=3	1.48423e+07	2.3698e+07	1.07966e+07	9.75019e+06	1.33255e+07	1.00939e+07	9.57209e+06	2.71866e+06	9.21888e+06	1.17924e+07	1.25004e+07	1.0194e+07	3.13124e+06	1.79168e+06	3.70477e+06	2.81218e+06	6.44843e+06
Ranbp1	P34022	Ran-specific GTPase-activating protein OS=Mus musculus OX=10090 GN=Ranbp1 PE=1 SV=2	3.39841e+06	3.77031e+06	3.13059e+06	1.07358e+06	6.11212e+06	1.26728e+06	1.88483e+06	1.36222e+06	1.69637e+06	1.68376e+06	4.5314e+06	1.41298e+06	602559	454525	616206	545279	1.10749e+06
Ranbp3	Q9CT10	Ran-binding protein 3 OS=Mus musculus OX=10090 GN=Ranbp3 PE=1 SV=2	10563.3	10563.3	221997	10563.3	10563.3	10563.3	748215	468509	10563.3	1.11065e+06	10563.3	710645	10563.3	10563.3	10563.3	10563.3	10563.3
Rap1a	P62835	Ras-related protein Rap-1A OS=Mus musculus OX=10090 GN=Rap1a PE=1 SV=1	464911	10563.3	788791	888813	645520	10563.3	269712	639550	10563.3	10563.3	286538	10563.3	674026	10563.3	10563.3	692636	1.16513e+06
Rap1b	Q99JI6	Ras-related protein Rap-1b OS=Mus musculus OX=10090 GN=Rap1b PE=1 SV=2	2.99458e+07	8.81339e+07	7.4459e+07	7.30895e+07	4.4539e+07	3.6238e+07	3.65571e+07	1.80649e+07	3.41385e+07	2.63394e+07	7.96499e+07	1.68179e+07	3.34312e+07	1.64315e+07	1.54591e+07	3.454e+07	8.43437e+07
Rapgef4	Q9EQZ6	Rap guanine nucleotide exchange factor 4 OS=Mus musculus OX=10090 GN=Rapgef4 PE=1 SV=1	3.50606e+07	6.42461e+07	2.42785e+07	7.77948e+06	7.84505e+06	3.38713e+07	2.90657e+07	10563.3	2.37848e+07	2.3637e+07	6.50557e+07	6.03285e+07	10563.3	10563.3	10563.3	10563.3	10563.3
Rarres2	Q9DD06	Retinoic acid receptor responder protein 2 OS=Mus musculus OX=10090 GN=Rarres2 PE=1 SV=1	3.57653e+06	4.09191e+06	8.62869e+06	7.49581e+06	5.45192e+06	1.10267e+07	2.39538e+07	1.88928e+06	2.91727e+07	1.13928e+07	2.29928e+07	1.20342e+07	2.31651e+07	1.62791e+07	2.41831e+07	2.2118e+07	1.49529e+07
Rasa3	Q60790	Ras GTPase-activating protein 3 OS=Mus musculus OX=10090 GN=Rasa3 PE=1 SV=2	385830	2.2452e+06	3.8803e+06	2.77685e+06	545208	841682	1.29998e+06	389662	322598	1.37383e+06	3.84589e+06	748515	855668	369203	10563.3	489775	1.61954e+06
Rasgrp2	Q9QUG9	RAS guanyl-releasing protein 2 OS=Mus musculus OX=10090 GN=Rasgrp2 PE=1 SV=2	248627	1.72666e+06	1.32276e+07	8.19741e+06	5.02717e+06	8.86678e+06	6.05196e+06	5.81587e+06	4.08492e+06	6.00485e+06	6.97098e+06	5.39863e+06	572490	10563.3	10563.3	1.00017e+06	2.23807e+06
Rassf8	Q8CJ96	Ras association domain-containing protein 8 OS=Mus musculus OX=10090 GN=Rassf8 PE=2 SV=1	2.53339e+06	2.3475e+06	2.34218e+06	2.43074e+06	2.9921e+06	1.68513e+06	6.24608e+06	2.24112e+06	5.13853e+06	2.26382e+06	2.54054e+06	4.71711e+06	10563.3	10563.3	10563.3	10563.3	10563.3
Rbp4	Q00724	Retinol-binding protein 4 OS=Mus musculus OX=10090 GN=Rbp4 PE=1 SV=2	2.40168e+07	2.03961e+07	3.35695e+07	4.04891e+07	2.23934e+07	5.13249e+07	1.13223e+08	4.34465e+07	1.3347e+08	3.30453e+07	6.95644e+07	9.08377e+07	1.05533e+07	8.51075e+06	6.41332e+07	1.03882e+07	2.18614e+06
Rbsn	Q80Y56	Rabenosyn-5 OS=Mus musculus OX=10090 GN=Rbsn PE=1 SV=1	353880	10563.3	4.41079e+06	10563.3	1.75916e+06	4.043e+06	1.42049e+06	10563.3	10563.3	2.88738e+06	10563.3	3.00512e+06	10563.3	10563.3	10563.3	10563.3	10563.3
Rbx1	P62878	E3 ubiquitin-protein ligase RBX1 OS=Mus musculus OX=10090 GN=Rbx1 PE=1 SV=1	390771	669881	10563.3	519429	683704	428579	425820	1.21814e+06	222928	2.11552e+06	619273	212895	10563.3	10563.3	10563.3	1.61427e+06	10563.3
Rd3	Q8BRE0	Protein RD3 OS=Mus musculus OX=10090 GN=Rd3 PE=1 SV=1	10563.3	10563.3	10563.3	10563.3	10563.3	10563.3	10563.3	10563.3	10563.3	10563.3	10563.3	10563.3	10563.3	10563.3	10563.3	10563.3	3.30779e+06
Rdx	P26043	Radixin OS=Mus musculus OX=10090 GN=Rdx PE=1 SV=3	10563.3	10563.3	1.46954e+06	773912	416449	1.10118e+06	896410	252810	838223	1.80809e+06	1.10178e+06	118067	480758	737073	611825	849673	1.57962e+06
Reep5	Q60870	Receptor expression-enhancing protein 5 OS=Mus musculus OX=10090 GN=Reep5 PE=1 SV=1	1.07743e+06	1.66938e+06	2.57812e+06	2.58288e+06	1.50405e+06	3.35845e+06	1.72165e+06	1.62742e+06	1.43221e+06	1.97758e+06	3.40367e+06	2.80813e+06	1.22168e+06	573518	119627	1.03069e+06	1.76988e+06
Reep6	Q9JM62	Receptor expression-enhancing protein 6 OS=Mus musculus OX=10090 GN=Reep6 PE=1 SV=1	10563.3	10563.3	10563.3	10563.3	10563.3	10563.3	10563.3	7.44474e+06	419432	3.11612e+06	4.61147e+06	10563.3	1.30194e+07	3.70964e+06	567690	1.28865e+07	2.89786e+07
Reg3b	P35230	Regenerating islet-derived protein 3-beta OS=Mus musculus OX=10090 GN=Reg3b PE=1 SV=1	10563.3	10563.3	10563.3	10563.3	10563.3	10563.3	428636	10563.3	1.10054e+06	10563.3	479247	10563.3	10563.3	10563.3	10563.3	10563.3	10563.3
Reg3g	O09049	Regenerating islet-derived protein 3-gamma OS=Mus musculus OX=10090 GN=Reg3g PE=1 SV=1	10563.3	10563.3	10563.3	10563.3	10563.3	10563.3	10563.3	10563.3	699457	10563.3	327498	10563.3	10563.3	10563.3	10563.3	10563.3	10563.3
Reln	Q60841	Reelin OS=Mus musculus OX=10090 GN=Reln PE=1 SV=3	9.68222e+07	5.72549e+07	1.58494e+08	2.10689e+08	2.57505e+08	1.73319e+08	1.30258e+08	1.05027e+08	1.11118e+08	7.41847e+07	7.52778e+07	1.02978e+08	1.81443e+07	1.7444e+07	1.33657e+07	2.18716e+07	3.16713e+07
Retn	Q99P87	Resistin OS=Mus musculus OX=10090 GN=Retn PE=1 SV=1	6.53202e+06	7.7229e+06	8.09033e+06	8.10831e+06	5.26871e+06	8.68445e+06	1.56838e+07	1.07354e+06	9.43807e+06	4.78354e+06	4.74568e+06	3.68889e+06	3.19502e+06	1.2068e+06	5.68073e+06	2.52297e+06	1.54601e+06
Retnla	Q9EP95	Resistin-like alpha OS=Mus musculus OX=10090 GN=Retnla PE=1 SV=1	796011	943982	926214	1.42958e+06	1.68947e+06	1.15636e+06	916917	10563.3	10563.3	10563.3	1.18993e+06	513001	10563.3	10563.3	10563.3	10563.3	10563.3
Retnlg	Q8K426	Resistin-like gamma OS=Mus musculus OX=10090 GN=Retnlg PE=1 SV=1	3.13066e+07	1.75998e+07	7.33479e+07	6.24084e+07	3.9608e+07	5.86508e+07	2.59399e+07	4.85359e+06	1.21718e+08	1.17801e+07	1.11962e+07	1.15084e+07	1.03161e+07	9.22609e+06	1.49441e+07	7.4934e+06	7.0209e+06
Rfk	Q8CFV9	Riboflavin kinase OS=Mus musculus OX=10090 GN=Rfk PE=1 SV=2	10563.3	10563.3	787094	10563.3	10563.3	10563.3	10563.3	10563.3	10563.3	10563.3	745400	123999	10563.3	10563.3	10563.3	10563.3	10563.3
Rgs18	Q99PG4	Regulator of G-protein signaling 18 OS=Mus musculus OX=10090 GN=Rgs18 PE=1 SV=1	310243	10563.3	10563.3	454905	10563.3	10563.3	10563.3	122357	346455	10563.3	418157	10563.3	10563.3	10563.3	10563.3	10563.3	10563.3
Rhcg	Q9QXP0	Ammonium transporter Rh type C OS=Mus musculus OX=10090 GN=Rhcg PE=1 SV=2	10563.3	10563.3	10563.3	10563.3	10563.3	10563.3	10563.3	10563.3	10563.3	10563.3	10563.3	10563.3	53988.6	10563.3	80382.1	21126.6	10563.3
Rheb	Q921J2	GTP-binding protein Rheb OS=Mus musculus OX=10090 GN=Rheb PE=1 SV=1	10563.3	10563.3	10563.3	10563.3	10563.3	10563.3	10563.3	10563.3	10563.3	10563.3	10563.3	10563.3	357685	361222	176654	401352	787020
Rhebl1	Q9D8T3	GTPase RhebL1 OS=Mus musculus OX=10090 GN=Rhebl1 PE=2 SV=1	10563.3	10563.3	10563.3	169181	153959	189988	536688	5.76907e+06	591295	584140	1.92307e+06	514273	10563.3	10563.3	10563.3	10563.3	10563.3
Rhoa	Q9QUI0	Transforming protein RhoA OS=Mus musculus OX=10090 GN=Rhoa PE=1 SV=1	7.29808e+06	1.4877e+07	9.69506e+06	1.03075e+07	1.15871e+07	6.78246e+06	7.05674e+06	3.82745e+06	6.72503e+06	8.93295e+06	1.3902e+07	3.11134e+06	7.2207e+06	5.00167e+06	6.0856e+06	8.23159e+06	1.20874e+07
Rhog	P84096	Rho-related GTP-binding protein RhoG OS=Mus musculus OX=10090 GN=Rhog PE=1 SV=1	500337	663387	396397	563962	666670	350721	400325	10563.3	356864	10563.3	516077	10563.3	10563.3	10563.3	10563.3	10563.3	10563.3
Rmnd5a	Q80YQ8	E3 ubiquitin-protein ligase RMND5A OS=Mus musculus OX=10090 GN=Rmnd5a PE=1 SV=2	10563.3	821578	10563.3	953380	10563.3	1.1774e+06	2.10516e+06	10563.3	10563.3	1.4682e+06	1.00025e+06	10563.3	10563.3	10563.3	10563.3	10563.3	10563.3
Rnase4	Q9JJH1	Ribonuclease 4 OS=Mus musculus OX=10090 GN=Rnase4 PE=1 SV=1	3.54882e+07	3.87036e+07	4.04808e+07	2.52733e+07	1.97031e+07	2.90901e+07	8.4972e+07	5.06125e+06	5.99079e+07	2.27763e+07	1.04108e+07	3.1442e+07	1.19789e+07	1.02822e+07	3.57644e+07	1.28334e+07	1.33705e+07
Rnf123	Q5XPI3	E3 ubiquitin-protein ligase RNF123 OS=Mus musculus OX=10090 GN=Rnf123 PE=1 SV=1	10563.3	87726.9	10563.3	10563.3	272251	10563.3	10563.3	10563.3	10563.3	10563.3	10563.3	10563.3	10563.3	10563.3	10563.3	362891	10563.3
Rnf130	Q8VEM1	E3 ubiquitin-protein ligase RNF130 OS=Mus musculus OX=10090 GN=Rnf130 PE=2 SV=1	10563.3	1.13477e+06	1.62305e+06	833695	10563.3	1.47473e+06	2.51893e+06	10563.3	1.56336e+06	2.50054e+06	1.60054e+06	427994	222013	10563.3	10563.3	215085	349595
Rnf20	Q5DTM8	E3 ubiquitin-protein ligase BRE1A OS=Mus musculus OX=10090 GN=Rnf20 PE=1 SV=2	10563.3	10563.3	10563.3	10563.3	10563.3	10563.3	10563.3	10563.3	10563.3	10563.3	10563.3	10563.3	788535	614593	364643	737694	976571
Rnpep	Q8VCT3	Aminopeptidase B OS=Mus musculus OX=10090 GN=Rnpep PE=1 SV=2	5.59629e+06	2.16385e+06	767205	1.13796e+06	809271	941141	3.27966e+06	4.27569e+06	3.97798e+06	4.70246e+06	415138	679010	10563.3	10563.3	10563.3	468796	1.23014e+06
Rp1l1	Q8CGM2	Retinitis pigmentosa 1-like 1 protein OS=Mus musculus OX=10090 GN=Rp1l1 PE=1 SV=1	10563.3	10563.3	10563.3	10563.3	10563.3	10563.3	10563.3	10563.3	10563.3	10563.3	10563.3	10563.3	2.89514e+06	4.00089e+06	4.15151e+06	6.80448e+06	4.05602e+06
Rpl15	Q9CZM2	60S ribosomal protein L15 OS=Mus musculus OX=10090 GN=Rpl15 PE=1 SV=4	10563.3	10563.3	10563.3	10563.3	10563.3	10563.3	10563.3	10563.3	10563.3	10563.3	10563.3	10563.3	10563.3	10563.3	10563.3	10563.3	10563.3
Rpl30	P62889	60S ribosomal protein L30 OS=Mus musculus OX=10090 GN=Rpl30 PE=1 SV=2	10563.3	10563.3	10563.3	10563.3	10563.3	10563.3	10563.3	10563.3	272483	10563.3	10563.3	10563.3	10563.3	10563.3	10563.3	10563.3	10563.3
Rpl7a	P12970	60S ribosomal protein L7a OS=Mus musculus OX=10090 GN=Rpl7a PE=1 SV=2	10563.3	10563.3	10563.3	349856	312647	10563.3	10563.3	10563.3	10563.3	10563.3	10563.3	10563.3	10563.3	10563.3	10563.3	10563.3	10563.3
Rplp0	P14869	60S acidic ribosomal protein P0 OS=Mus musculus OX=10090 GN=Rplp0 PE=1 SV=3	10563.3	10563.3	10563.3	10563.3	1.03807e+06	10563.3	447532	261348	1.03035e+06	10563.3	10563.3	10563.3	1.24849e+06	486966	214441	364409	552793
Rplp1	P47955	60S acidic ribosomal protein P1 OS=Mus musculus OX=10090 GN=Rplp1 PE=1 SV=1	10563.3	10563.3	194248	10563.3	10563.3	10563.3	10563.3	10563.3	10563.3	10563.3	816389	10563.3	10563.3	10563.3	10563.3	10563.3	10563.3
Rplp2	P99027	60S acidic ribosomal protein P2 OS=Mus musculus OX=10090 GN=Rplp2 PE=1 SV=3	3.48794e+06	839051	2.18102e+06	2.91189e+06	4.48762e+06	1.32642e+06	1.87517e+06	2.24231e+06	3.0547e+06	1.94251e+06	1.83832e+06	394617	1.86622e+06	1.44002e+06	691101	1.75154e+06	3.34608e+06
Rps10	P63325	40S ribosomal protein S10 OS=Mus musculus OX=10090 GN=Rps10 PE=1 SV=1	5.54422e+07	4.37364e+07	3.27091e+07	1.83896e+07	10563.3	2.77835e+07	5.21879e+07	417994	9.58118e+07	4.10872e+07	1.88684e+07	4.39996e+07	10563.3	10563.3	10563.3	10563.3	10563.3
Rps12	P63323	40S ribosomal protein S12 OS=Mus musculus OX=10090 GN=Rps12 PE=1 SV=2	10563.3	255368	1.09972e+06	1.13348e+06	1.04232e+06	495585	637760	395548	1.31875e+06	547918	1.76033e+06	10563.3	10563.3	10563.3	10563.3	10563.3	10563.3
Rps18	P62270	40S ribosomal protein S18 OS=Mus musculus OX=10090 GN=Rps18 PE=1 SV=3	10563.3	10563.3	264704	385277	464279	10563.3	271579	201578	484215	365255	349159	10563.3	10563.3	10563.3	10563.3	10563.3	10563.3
Rps19	Q9CZX8	40S ribosomal protein S19 OS=Mus musculus OX=10090 GN=Rps19 PE=1 SV=3	10563.3	10563.3	10563.3	777301	320107	10563.3	1.09524e+06	112927	589736	1.26863e+06	10563.3	10563.3	10563.3	10563.3	10563.3	10563.3	10563.3
Rps25	P62852	40S ribosomal protein S25 OS=Mus musculus OX=10090 GN=Rps25 PE=1 SV=1	10563.3	10563.3	341668	433992	457368	10563.3	403518	10563.3	510054	400347	10563.3	10563.3	352685	10563.3	237305	284488	10563.3
Rps28	P62858	40S ribosomal protein S28 OS=Mus musculus OX=10090 GN=Rps28 PE=1 SV=1	10563.3	10563.3	10563.3	10563.3	10563.3	10563.3	10563.3	10563.3	10563.3	10563.3	10563.3	10563.3	1.05731e+06	1.15837e+06	943023	934137	1.77638e+06
Rps3	P62908	40S ribosomal protein S3 OS=Mus musculus OX=10090 GN=Rps3 PE=1 SV=1	10563.3	10563.3	10563.3	848397	1.09323e+06	10563.3	622172	113235	641533	1.87241e+06	520978	10563.3	10563.3	10563.3	10563.3	10563.3	10563.3
Rps3a	P97351	40S ribosomal protein S3a OS=Mus musculus OX=10090 GN=Rps3a PE=1 SV=3	334518	278519	1.03921e+06	570688	581254	10563.3	462602	361332	752754	505687	678631	604754	10563.3	10563.3	10563.3	10563.3	10563.3
Rps5	P97461	40S ribosomal protein S5 OS=Mus musculus OX=10090 GN=Rps5 PE=1 SV=3	875969	3.7596e+06	3.5167e+06	3.14733e+06	1.29794e+06	3.21377e+06	962855	388389	1.36469e+06	1.98517e+06	3.72405e+06	702589	10563.3	10563.3	10563.3	10563.3	10563.3
Rps7	P62082	40S ribosomal protein S7 OS=Mus musculus OX=10090 GN=Rps7 PE=2 SV=1	10563.3	10563.3	10563.3	411037	10563.3	10563.3	439196	10563.3	232138	10563.3	10563.3	10563.3	10563.3	10563.3	10563.3	10563.3	10563.3
Rpsa	P14206	40S ribosomal protein SA OS=Mus musculus OX=10090 GN=Rpsa PE=1 SV=4	1.21217e+06	3.32546e+06	2.85923e+06	2.25169e+06	1.72677e+06	2.39099e+06	4.86195e+06	514956	4.31295e+06	5.63912e+06	6.44441e+06	2.95669e+06	1.59445e+06	10563.3	526084	497006	1.56302e+06
Rrbp1	Q99PL5	Ribosome-binding protein 1 OS=Mus musculus OX=10090 GN=Rrbp1 PE=1 SV=2	418973	403373	512156	411322	10563.3	342186	483135	10563.3	357098	464097	366923	10563.3	10563.3	10563.3	10563.3	10563.3	10563.3
Rsu1	Q01730	Ras suppressor protein 1 OS=Mus musculus OX=10090 GN=Rsu1 PE=1 SV=3	3.78777e+06	1.06597e+07	1.06608e+07	1.43454e+07	5.30285e+06	7.86835e+06	6.15079e+06	1.33335e+06	1.17755e+07	4.59874e+06	1.82839e+07	1.03632e+06	3.96214e+06	2.40691e+06	2.26979e+06	5.3607e+06	6.77064e+06
Rtn1	Q8K0T0	Reticulon-1 OS=Mus musculus OX=10090 GN=Rtn1 PE=1 SV=1	10563.3	10563.3	10563.3	4.67119e+06	10563.3	10563.3	685092	10563.3	10563.3	1.6702e+06	689057	10563.3	10563.3	10563.3	10563.3	10563.3	10563.3
Rtn3	Q9ES97	Reticulon-3 OS=Mus musculus OX=10090 GN=Rtn3 PE=1 SV=2	10563.3	10563.3	10563.3	1.66652e+06	10563.3	10563.3	10563.3	481546	10563.3	10563.3	10563.3	10563.3	10563.3	10563.3	10563.3	10563.3	10563.3
Ruvbl1	P60122	RuvB-like 1 OS=Mus musculus OX=10090 GN=Ruvbl1 PE=1 SV=1	10563.3	10563.3	266094	291400	275622	10563.3	10563.3	10563.3	10563.3	10563.3	10563.3	10563.3	10563.3	10563.3	10563.3	10563.3	10563.3
Ryr1	E9PZQ0	Ryanodine receptor 1 OS=Mus musculus OX=10090 GN=Ryr1 PE=1 SV=1	261730	340457	10563.3	10563.3	10563.3	201913	693937	10563.3	1.10448e+06	1.76649e+06	10563.3	10563.3	10563.3	10563.3	10563.3	10563.3	10563.3
S100a1	P56565	Protein S100-A1 OS=Mus musculus OX=10090 GN=S100a1 PE=1 SV=2	10563.3	703941	570562	647042	895950	10563.3	431168	10563.3	10563.3	752747	759131	10563.3	10563.3	10563.3	10563.3	10563.3	10563.3
S100a10	P08207	Protein S100-A10 OS=Mus musculus OX=10090 GN=S100a10 PE=1 SV=2	10563.3	10563.3	10563.3	10563.3	10563.3	10563.3	10563.3	10563.3	10563.3	10563.3	10563.3	10563.3	10563.3	80344.9	10563.3	238905	10563.3
S100a11	P50543	Protein S100-A11 OS=Mus musculus OX=10090 GN=S100a11 PE=1 SV=1	1.15028e+07	9.85164e+06	1.09283e+07	1.1546e+07	8.82175e+06	8.96879e+06	8.20694e+06	2.37961e+06	7.26755e+06	8.55969e+06	9.99574e+06	9.11294e+06	10563.3	10563.3	10563.3	10563.3	10563.3
S100a13	P97352	Protein S100-A13 OS=Mus musculus OX=10090 GN=S100a13 PE=1 SV=1	10563.3	10563.3	1.90668e+06	672427	586950	1.44592e+06	859869	479512	850149	1.69597e+06	1.11119e+06	740872	10563.3	10563.3	10563.3	10563.3	10563.3
S100a4	P07091	Protein S100-A4 OS=Mus musculus OX=10090 GN=S100a4 PE=1 SV=1	1.0043e+06	825663	899752	1.45072e+06	1.2335e+06	1.17277e+06	614500	854969	674333	955199	1.67497e+06	787098	742735	550358	358695	626398	1.09975e+06
S100a6	P14069	Protein S100-A6 OS=Mus musculus OX=10090 GN=S100a6 PE=1 SV=3	8.05595e+06	1.09662e+07	5.34811e+06	9.51731e+06	8.88171e+06	7.93983e+06	7.8042e+06	2.78619e+07	2.37025e+07	2.71182e+07	2.2319e+07	8.18669e+06	7.13296e+06	6.36921e+06	7.22789e+06	1.12399e+07	1.0819e+07
S100a8	P27005	Protein S100-A8 OS=Mus musculus OX=10090 GN=S100a8 PE=1 SV=3	10563.3	289039	375817	10563.3	431082	341892	595849	919026	2.74275e+07	10563.3	10563.3	10563.3	10563.3	10563.3	10563.3	10563.3	10563.3
S100a9	P31725	Protein S100-A9 OS=Mus musculus OX=10090 GN=S100a9 PE=1 SV=3	4.21715e+06	3.42707e+06	8.28072e+06	1.41206e+07	4.71011e+06	6.32642e+06	1.10218e+07	9.3695e+06	1.05386e+08	9.55462e+06	3.66349e+06	4.46307e+06	2.14915e+06	5.54185e+06	1.20131e+07	3.36102e+06	923518
Saa1	P05366	Serum amyloid A-1 protein OS=Mus musculus OX=10090 GN=Saa1 PE=1 SV=2	5.03601e+07	1.93595e+08	8.32047e+07	6.89419e+08	4.21978e+08	9.05186e+08	1.69738e+09	1.54883e+09	1.16308e+09	3.82361e+08	7.33192e+07	4.20995e+07	8.0831e+08	1.1576e+08	2.18155e+08	2.31957e+08	3.8409e+08
Saa2	P05367	Serum amyloid A-2 protein OS=Mus musculus OX=10090 GN=Saa2 PE=1 SV=1	4.71393e+07	1.69935e+08	6.06826e+07	9.09821e+08	5.65628e+08	1.31175e+09	2.85507e+09	2.23095e+09	1.42459e+09	4.47583e+08	7.29717e+07	4.52919e+07	1.67723e+08	1.60033e+07	2.49688e+07	4.05869e+07	5.12177e+07
Saa3	P04918	Serum amyloid A-3 protein OS=Mus musculus OX=10090 GN=Saa3 PE=1 SV=1	10563.3	10563.3	10563.3	10563.3	10563.3	10563.3	1.41825e+06	10563.3	6.15495e+06	10563.3	10563.3	10563.3	10563.3	10563.3	10563.3	10563.3	10563.3
Saa4	P31532	Serum amyloid A-4 protein OS=Mus musculus OX=10090 GN=Saa4 PE=1 SV=2	3.36423e+09	4.35552e+09	2.74642e+09	3.68051e+09	3.90268e+09	3.33235e+09	2.51703e+09	2.77693e+09	1.99084e+09	6.93193e+08	1.9598e+09	1.28539e+09	1.13068e+09	5.08119e+08	7.07066e+08	1.09255e+09	6.20668e+08
Sar1b	Q9CQC9	GTP-binding protein SAR1b OS=Mus musculus OX=10090 GN=Sar1b PE=1 SV=1	589628	2.39449e+06	1.54355e+06	2.46033e+06	412404	1.59315e+06	1.71414e+06	2.52195e+06	2.0011e+06	2.00064e+06	3.97515e+06	1.15452e+06	1.75079e+06	3.09593e+06	720599	2.44724e+06	5.62784e+06
Sardh	Q99LB7	Sarcosine dehydrogenase, mitochondrial OS=Mus musculus OX=10090 GN=Sardh PE=1 SV=1	10563.3	10563.3	10563.3	10563.3	10563.3	10563.3	10563.3	10563.3	10563.3	3.24942e+06	397931	10563.3	209580	1.7761e+06	10563.3	309502	582102
Sbsn	Q8CIT9	Suprabasin OS=Mus musculus OX=10090 GN=Sbsn PE=2 SV=1	3.87394e+06	1.84463e+06	2.49791e+06	5.96869e+06	6.19186e+06	1.08934e+06	725179	10563.3	10563.3	10563.3	406322	10563.3	10563.3	10563.3	10563.3	10563.3	10563.3
Scamp5	Q9JKD3	Secretory carrier-associated membrane protein 5 OS=Mus musculus OX=10090 GN=Scamp5 PE=1 SV=1	10563.3	10563.3	10563.3	739310	10563.3	10563.3	10563.3	10563.3	10563.3	10563.3	10563.3	10563.3	10563.3	10563.3	10563.3	10563.3	10563.3
Scg2	Q03517	Secretogranin-2 OS=Mus musculus OX=10090 GN=Scg2 PE=1 SV=1	10563.3	640814	493042	698360	390402	347803	748193	520585	630795	265247	836888	10563.3	10563.3	10563.3	10563.3	10563.3	10563.3
Scg3	P47867	Secretogranin-3 OS=Mus musculus OX=10090 GN=Scg3 PE=1 SV=1	2.88686e+06	4.66406e+06	2.53669e+06	4.59839e+06	3.91104e+06	4.88643e+06	800841	1.04509e+06	1.42639e+06	1.74255e+06	1.34168e+06	450766	10563.3	10563.3	10563.3	10563.3	10563.3
Scgb1a1	Q06318	Uteroglobin OS=Mus musculus OX=10090 GN=Scgb1a1 PE=1 SV=1	288790	10563.3	490791	10563.3	381994	244538	292358	10563.3	389483	10563.3	363900	10563.3	10563.3	10563.3	10563.3	10563.3	10563.3
Scgb2b2	Q6UGQ3	Secretoglobin family 2B member 2 OS=Mus musculus OX=10090 GN=Scgb2b2 PE=2 SV=1	1.70585e+08	1.69173e+08	1.80188e+07	1.04395e+08	7.47243e+07	6.44086e+07	1.89052e+07	3.9208e+07	4.08304e+07	8.20879e+07	1.55507e+08	5.24088e+07	1.84749e+06	2.17233e+06	1.77526e+06	1.17952e+06	1.34051e+06
Scgb2b20	Q9JI02	Secretoglobin family 2B member 20 OS=Mus musculus OX=10090 GN=Scgb2b20 PE=2 SV=1	2.32289e+08	1.59806e+08	3.00664e+07	1.92015e+08	1.25871e+08	5.78878e+07	1.91543e+06	3.33439e+06	2.59898e+06	1.00053e+07	4.56329e+07	768921	300216	1.51165e+06	357218	10563.3	10563.3
Scgb2b24	Q7M747	Secretoglobin family 2B member 24 OS=Mus musculus OX=10090 GN=Scgb2b24 PE=2 SV=1	1.36775e+08	8.76234e+07	1.87506e+07	1.32012e+08	7.85983e+07	4.92421e+07	3.06188e+07	5.3193e+07	1.92783e+07	5.79012e+07	1.29832e+08	2.63767e+07	1.04225e+07	5.24684e+06	7.69483e+06	8.14087e+06	5.78628e+06
Scin	Q60604	Adseverin OS=Mus musculus OX=10090 GN=Scin PE=1 SV=3	1.70952e+06	4.96667e+06	5.53674e+06	3.3881e+06	2.75526e+06	1.09903e+07	3.07543e+06	10563.3	1.61825e+06	4.75416e+06	3.28023e+06	3.82529e+06	10563.3	10563.3	10563.3	10563.3	10563.3
Scp2	P32020	Non-specific lipid-transfer protein OS=Mus musculus OX=10090 GN=Scp2 PE=1 SV=3	10563.3	10563.3	10563.3	10563.3	10563.3	10563.3	10563.3	425838	10563.3	313736	507813	10563.3	2.86517e+06	6.93343e+06	1.30269e+06	5.16397e+06	1.25909e+07
Sdcbp	O08992	Syntenin-1 OS=Mus musculus OX=10090 GN=Sdcbp PE=1 SV=1	10563.3	10563.3	10563.3	10563.3	10563.3	10563.3	10563.3	10563.3	10563.3	10563.3	10563.3	10563.3	209000	1.50982e+06	10563.3	710031	4.82387e+06
Sdf2	Q9DCT5	Stromal cell-derived factor 2 OS=Mus musculus OX=10090 GN=Sdf2 PE=1 SV=1	10563.3	10563.3	10563.3	100911	10563.3	10563.3	10563.3	421925	10563.3	10563.3	10563.3	10563.3	10563.3	10563.3	10563.3	10563.3	10563.3
Sdf4	Q61112	45 kDa calcium-binding protein OS=Mus musculus OX=10090 GN=Sdf4 PE=1 SV=1	5.34902e+06	8.79203e+06	3.08553e+06	5.93742e+06	6.70377e+06	6.65854e+06	8.37234e+06	6.27794e+06	7.78877e+06	8.22351e+06	7.17636e+06	6.32031e+06	3.90528e+06	3.0892e+06	1.82394e+06	4.43003e+06	7.26019e+06
Sec13	Q9D1M0	Protein SEC13 homolog OS=Mus musculus OX=10090 GN=Sec13 PE=1 SV=3	258971	362765	453923	407023	222764	269695	288059	10563.3	266846	205142	483746	10563.3	10563.3	10563.3	10563.3	10563.3	10563.3
Sec23a	Q01405	Protein transport protein Sec23A OS=Mus musculus OX=10090 GN=Sec23a PE=1 SV=2	2.42214e+06	2.6177e+06	3.93832e+06	4.55549e+06	2.02359e+06	3.64673e+06	864702	7.46505e+06	583955	1.63203e+06	3.32826e+06	398230	2.18432e+07	1.42322e+07	4.29837e+06	1.92688e+07	4.92766e+07
Sec23b	Q9D662	Protein transport protein Sec23B OS=Mus musculus OX=10090 GN=Sec23b PE=1 SV=1	10563.3	10563.3	10563.3	10563.3	10563.3	10563.3	10563.3	10563.3	10563.3	10563.3	10563.3	10563.3	10563.3	234885	10563.3	402292	321976
Sec24a	Q3U2P1	Protein transport protein Sec24A OS=Mus musculus OX=10090 GN=Sec24a PE=1 SV=1	10563.3	10563.3	10563.3	10563.3	10563.3	10563.3	10563.3	10563.3	10563.3	10563.3	10563.3	10563.3	2.06559e+07	1.52896e+07	1.02148e+07	2.03793e+07	2.96032e+07
Sele	Q00690	E-selectin OS=Mus musculus OX=10090 GN=Sele PE=2 SV=1	831868	638209	568447	10563.3	990814	436748	246918	10563.3	505200	10563.3	10563.3	364546	10563.3	10563.3	10563.3	10563.3	10563.3
Selenbp2	Q63836	Selenium-binding protein 2 OS=Mus musculus OX=10090 GN=Selenbp2 PE=1 SV=2	10563.3	10563.3	10563.3	10563.3	10563.3	10563.3	10563.3	10563.3	10563.3	10563.3	10563.3	10563.3	1.35351e+06	1.15337e+06	2.10741e+06	2.2194e+06	2.33142e+06
Selenof	Q9ERR7	Selenoprotein F OS=Mus musculus OX=10090 GN=Selenof PE=1 SV=3	10563.3	10563.3	10563.3	10563.3	10563.3	10563.3	10563.3	10563.3	10563.3	10563.3	10563.3	430591	10563.3	10563.3	10563.3	10563.3	10563.3
Selenop	P70274	Selenoprotein P OS=Mus musculus OX=10090 GN=Selenop PE=1 SV=3	3.50473e+08	1.9455e+08	2.41134e+08	1.56032e+08	1.38148e+08	1.66609e+08	1.66766e+08	8.1263e+07	1.22421e+08	1.01788e+08	1.83258e+08	1.49083e+08	1.35778e+08	9.70712e+07	1.30158e+08	1.21433e+08	1.11991e+08
Sephs2	P97364	Selenide, water dikinase 2 OS=Mus musculus OX=10090 GN=Sephs2 PE=1 SV=3	10563.3	10563.3	10563.3	10563.3	10563.3	344848	10563.3	645730	10563.3	547057	1.27708e+06	10563.3	1.45458e+06	2.19133e+06	10563.3	1.62156e+06	838228
Septin10	Q8C650	Septin-10 OS=Mus musculus OX=10090 GN=Septin10 PE=1 SV=1	10563.3	10563.3	10563.3	10563.3	10563.3	10563.3	10563.3	10563.3	10563.3	10563.3	10563.3	10563.3	254048	10563.3	244515	304659	719971
Septin11	Q8C1B7	Septin-11 OS=Mus musculus OX=10090 GN=Septin11 PE=1 SV=4	3.10951e+06	4.48886e+06	3.54909e+06	5.73043e+06	4.85745e+06	3.75503e+06	3.93274e+06	1.11018e+06	2.47201e+06	4.65007e+06	4.71933e+06	4.05346e+06	10563.3	10563.3	10563.3	10563.3	10563.3
Septin2	P42208	Septin-2 OS=Mus musculus OX=10090 GN=Septin2 PE=1 SV=2	10563.3	10563.3	10563.3	400405	10563.3	10563.3	10563.3	10563.3	10563.3	10563.3	669141	10563.3	10563.3	10563.3	10563.3	10563.3	10563.3
Septin5	Q9Z2Q6	Septin-5 OS=Mus musculus OX=10090 GN=Septin5 PE=1 SV=2	10563.3	10563.3	10563.3	10563.3	10563.3	10563.3	10563.3	10563.3	10563.3	10563.3	10563.3	10563.3	1.41753e+06	10563.3	10563.3	10563.3	10563.3
Septin6	Q9R1T4	Septin-6 OS=Mus musculus OX=10090 GN=Septin6 PE=1 SV=4	10563.3	10563.3	10563.3	10563.3	10563.3	10563.3	10563.3	10563.3	10563.3	10563.3	10563.3	10563.3	496558	173586	204099	231134	883532
Septin7	O55131	Septin-7 OS=Mus musculus OX=10090 GN=Septin7 PE=1 SV=1	488875	671363	693060	4.17503e+06	562772	10563.3	10563.3	654225	10563.3	533296	1.24485e+06	10563.3	10563.3	10563.3	10563.3	10563.3	10563.3
Serpina10	Q8R121	Protein Z-dependent protease inhibitor OS=Mus musculus OX=10090 GN=Serpina10 PE=1 SV=1	6.94489e+08	7.86887e+08	6.07639e+08	6.89162e+08	6.13823e+08	6.63476e+08	7.83442e+08	7.07563e+08	4.55036e+08	4.65576e+08	4.24255e+08	6.94712e+08	8.98194e+08	5.61614e+08	8.92605e+08	6.42565e+08	6.8394e+08
Serpina1a	P07758	Alpha-1-antitrypsin 1-1 OS=Mus musculus OX=10090 GN=Serpina1a PE=1 SV=4	1.64017e+09	1.8269e+09	1.6411e+09	1.7439e+09	1.8071e+09	2.11163e+09	7.70291e+08	6.48975e+08	9.1935e+08	1.19164e+09	1.00096e+09	9.0582e+08	3.06243e+08	6.35227e+08	7.87712e+08	3.53582e+08	2.47098e+08
Serpina1b	P22599	Alpha-1-antitrypsin 1-2 OS=Mus musculus OX=10090 GN=Serpina1b PE=1 SV=2	6.7165e+08	6.58324e+08	6.7096e+08	7.20543e+08	6.02942e+08	7.63853e+08	6.15141e+08	2.58133e+08	6.6535e+08	6.57238e+08	4.81091e+08	6.97053e+08	2.83477e+08	6.23292e+08	7.82096e+08	2.90042e+08	2.30667e+08
Serpina1d	Q00897	Alpha-1-antitrypsin 1-4 OS=Mus musculus OX=10090 GN=Serpina1d PE=1 SV=1	3.39692e+09	4.19769e+09	3.55049e+09	3.73391e+09	3.65229e+09	4.30006e+09	2.66237e+09	2.15638e+09	2.6282e+09	3.56794e+09	2.77769e+09	3.26939e+09	1.37614e+09	2.92091e+09	3.63915e+09	1.4918e+09	9.83554e+08
Serpina1e	Q00898	Alpha-1-antitrypsin 1-5 OS=Mus musculus OX=10090 GN=Serpina1e PE=1 SV=1	4.32751e+08	5.89299e+08	5.3085e+08	5.6261e+08	3.93793e+08	5.20981e+08	5.35396e+06	10563.3	3.29806e+06	2.35987e+06	3.03185e+06	2.06219e+06	10563.3	10563.3	10563.3	10563.3	10563.3
Serpina3b	Q8BYY9	Serine protease inhibitor A3B OS=Mus musculus OX=10090 GN=Serpina3b PE=2 SV=1	1.35386e+06	3.27973e+06	650631	1.05187e+06	1.09757e+06	3.94344e+06	1.21792e+06	10563.3	1.84017e+06	416603	430886	2.19669e+06	2.29785e+07	3.65137e+07	1.85241e+07	2.23391e+07	1.99036e+07
Serpina3c	P29621	Serine protease inhibitor A3C OS=Mus musculus OX=10090 GN=Serpina3c PE=2 SV=1	7.74074e+06	7.56241e+06	3.74852e+06	7.14207e+06	6.70077e+06	7.23119e+06	1.78997e+06	1.39122e+06	851198	3.80211e+06	2.93615e+06	2.3546e+06	4.53061e+06	4.16486e+06	3.19223e+06	3.18959e+06	2.79209e+06
Serpina3f	Q80X76	Serine protease inhibitor A3F OS=Mus musculus OX=10090 GN=Serpina3f PE=1 SV=3	5.63918e+06	4.21587e+06	3.07911e+06	5.07244e+06	4.78322e+06	3.74602e+06	4.1621e+06	2.58789e+06	6.37651e+06	2.78252e+06	3.42429e+06	3.83917e+06	10563.3	10563.3	10563.3	10563.3	10563.3
Serpina3k	P07759	Serine protease inhibitor A3K OS=Mus musculus OX=10090 GN=Serpina3k PE=1 SV=2	2.91219e+09	2.54511e+09	1.92002e+09	1.82794e+09	1.6603e+09	2.01863e+09	5.40414e+08	4.6563e+08	8.94993e+08	5.28876e+08	8.78125e+08	6.78045e+08	3.68721e+08	6.58389e+08	7.79355e+08	2.21498e+08	2.76696e+08
Serpina3m	Q03734	Serine protease inhibitor A3M OS=Mus musculus OX=10090 GN=Serpina3m PE=1 SV=2	2.27492e+09	2.1503e+09	1.697e+09	1.74303e+09	1.65048e+09	1.80063e+09	1.10186e+09	1.27242e+09	1.46312e+09	1.03118e+09	1.57652e+09	1.64119e+09	1.60713e+09	1.52329e+09	1.2304e+09	1.90205e+09	2.17912e+09
Serpina3n	Q91WP6	Serine protease inhibitor A3N OS=Mus musculus OX=10090 GN=Serpina3n PE=1 SV=1	1.18014e+09	1.07944e+09	7.71824e+08	1.09638e+09	1.09979e+09	1.1554e+09	8.47234e+08	7.89849e+08	1.23527e+09	5.76968e+08	7.92042e+08	7.87134e+08	1.91004e+08	1.84511e+08	5.05216e+08	2.53448e+08	1.4216e+08
Serpina6	Q06770	Corticosteroid-binding globulin OS=Mus musculus OX=10090 GN=Serpina6 PE=1 SV=1	2.14403e+07	5.64501e+06	1.25677e+07	5.37777e+06	1.03393e+07	5.28678e+06	1.17627e+07	7.48862e+06	7.41786e+06	3.19944e+07	1.06939e+07	1.34161e+07	6.28932e+06	3.53852e+07	7.20532e+07	1.64291e+07	5.65304e+06
Serpina7	P61939	Thyroxine-binding globulin OS=Mus musculus OX=10090 GN=Serpina7 PE=2 SV=1	3.40339e+06	969385	2.75775e+06	1.83065e+06	2.38258e+06	1.86734e+06	1.07419e+07	1.07083e+07	2.81392e+07	2.10714e+06	1.00557e+07	3.93342e+06	1.58243e+07	9.96219e+06	2.3818e+07	2.45687e+07	1.28123e+07
Serpinb1a	Q9D154	Leukocyte elastase inhibitor A OS=Mus musculus OX=10090 GN=Serpinb1a PE=1 SV=1	494350	745756	116773	10563.3	413288	1.14548e+06	165306	10563.3	534548	10563.3	10563.3	10563.3	10563.3	10563.3	10563.3	10563.3	10563.3
Serpinb2	P12388	Plasminogen activator inhibitor 2, macrophage OS=Mus musculus OX=10090 GN=Serpinb2 PE=1 SV=1	10563.3	10563.3	10563.3	10563.3	10563.3	10563.3	10563.3	10563.3	10563.3	10563.3	10563.3	10563.3	47118.5	10563.3	10563.3	10563.3	10563.3
Serpinb6	Q60854	Serpin B6 OS=Mus musculus OX=10090 GN=Serpinb6 PE=1 SV=1	10563.3	10563.3	10563.3	10563.3	10563.3	10563.3	10563.3	10563.3	10563.3	10563.3	10563.3	10563.3	361402	206088	340049	295901	366674
Serpinc1	P32261	Antithrombin-III OS=Mus musculus OX=10090 GN=Serpinc1 PE=1 SV=1	2.63343e+09	2.77586e+09	3.29532e+09	2.54977e+09	3.19158e+09	3.0074e+09	4.12636e+09	1.63302e+09	3.64802e+09	3.22549e+09	5.56892e+09	4.33927e+09	3.7817e+09	5.84634e+09	5.32675e+09	5.54432e+09	4.96328e+09
Serpind1	P49182	Heparin cofactor 2 OS=Mus musculus OX=10090 GN=Serpind1 PE=1 SV=1	7.67229e+08	6.70675e+08	5.86948e+08	4.40308e+08	4.109e+08	4.33296e+08	3.01457e+08	3.65558e+08	3.07357e+08	4.84889e+08	4.33682e+08	3.17416e+08	7.72096e+08	5.74443e+08	6.42558e+08	7.17372e+08	5.81808e+08
Serpine1	P22777	Plasminogen activator inhibitor 1 OS=Mus musculus OX=10090 GN=Serpine1 PE=1 SV=1	10563.3	182193	10563.3	167293	10563.3	10563.3	2.09179e+06	249937	5.12072e+06	10563.3	10563.3	10563.3	373796	1.11773e+06	487022	381281	451551
Serpine2	Q07235	Glia-derived nexin OS=Mus musculus OX=10090 GN=Serpine2 PE=1 SV=2	5.56366e+08	6.49077e+08	3.78372e+08	2.06222e+08	3.26997e+08	1.5787e+08	3.47627e+08	4.54658e+08	1.93843e+08	2.27758e+08	7.58892e+07	1.32243e+08	1.05813e+09	6.93211e+08	8.59073e+08	1.05279e+09	1.3359e+09
Serpinf1	P97298	Pigment epithelium-derived factor OS=Mus musculus OX=10090 GN=Serpinf1 PE=1 SV=2	1.0681e+08	1.04856e+08	1.05008e+08	2.45711e+08	8.75413e+07	2.19135e+08	2.5733e+08	1.92998e+08	2.8249e+08	1.47167e+08	3.43273e+08	2.51579e+08	4.52201e+08	3.0009e+08	8.15141e+08	5.13286e+08	3.17596e+08
Serpinf2	Q61247	Alpha-2-antiplasmin OS=Mus musculus OX=10090 GN=Serpinf2 PE=1 SV=1	6.86452e+08	5.42023e+08	7.80245e+08	6.38362e+08	5.82474e+08	6.55146e+08	2.40634e+08	4.95886e+08	2.38054e+08	5.34622e+08	5.02705e+08	5.43104e+08	5.70106e+08	8.13414e+08	5.46723e+08	7.51105e+08	2.988e+08
Serping1	P97290	Plasma protease C1 inhibitor OS=Mus musculus OX=10090 GN=Serping1 PE=1 SV=3	3.77533e+08	4.69894e+08	7.59002e+08	7.15508e+08	1.02092e+09	7.09097e+08	1.2538e+08	3.77518e+08	1.41215e+08	4.99172e+08	2.82669e+08	3.00735e+08	4.9209e+08	5.88067e+08	2.77774e+08	6.96712e+08	3.86278e+08
Serpini1	O35684	Neuroserpin OS=Mus musculus OX=10090 GN=Serpini1 PE=1 SV=1	2.7632e+06	5.19688e+06	3.93237e+06	2.97094e+06	3.4824e+06	3.63609e+06	5.34004e+06	529434	6.01694e+06	1.36263e+07	7.75538e+06	5.60338e+06	1.79495e+06	151503	192883	965369	1.07972e+06
Sfn	O70456	14-3-3 protein sigma OS=Mus musculus OX=10090 GN=Sfn PE=1 SV=2	1.89996e+06	2.7076e+06	601824	8.35025e+06	6.48737e+06	2.15343e+06	4.14348e+06	6.16936e+06	2.59381e+06	6.81847e+06	3.94127e+06	1.21411e+06	1.7686e+06	1.15349e+06	1.71424e+06	4.79103e+06	3.38386e+06
Sftpb	P50405	Pulmonary surfactant-associated protein B OS=Mus musculus OX=10090 GN=Sftpb PE=1 SV=1	383403	879492	2.33005e+06	614230	1.59387e+06	1.00897e+06	241312	1.7064e+06	563659	1.00212e+06	714182	451315	10563.3	10563.3	10563.3	10563.3	10563.3
Sh3gl2	Q62420	Endophilin-A1 OS=Mus musculus OX=10090 GN=Sh3gl2 PE=1 SV=2	10563.3	10563.3	10563.3	810235	10563.3	10563.3	363009	10563.3	10563.3	10563.3	10563.3	10563.3	10563.3	10563.3	10563.3	10563.3	10563.3
Shmt1	P50431	Serine hydroxymethyltransferase, cytosolic OS=Mus musculus OX=10090 GN=Shmt1 PE=1 SV=3	10563.3	10563.3	10563.3	10563.3	10563.3	10563.3	10563.3	10563.3	10563.3	10563.3	10563.3	10563.3	306718	2.33715e+06	10563.3	376350	2.09197e+06
Sil1	Q9EPK6	Nucleotide exchange factor SIL1 OS=Mus musculus OX=10090 GN=Sil1 PE=1 SV=2	1.08886e+07	6.28584e+06	1.00357e+06	2.6063e+06	4.73954e+06	896427	271716	1.6179e+06	8.72781e+06	1.3066e+06	3.27604e+06	10563.3	1.69625e+06	742578	423305	1.18147e+06	2.0947e+06
Sirt2	Q8VDQ8	NAD-dependent protein deacetylase sirtuin-2 OS=Mus musculus OX=10090 GN=Sirt2 PE=1 SV=2	10563.3	10563.3	435512	10563.3	10563.3	10563.3	10563.3	10563.3	10563.3	10563.3	10563.3	10563.3	731144	1.66911e+06	1.66268e+06	1.322e+06	1.27632e+06
Skap2	Q3UND0	Src kinase-associated phosphoprotein 2 OS=Mus musculus OX=10090 GN=Skap2 PE=1 SV=2	2.19541e+06	6.94514e+06	5.95464e+06	2.73257e+06	3.48013e+06	1.94397e+06	3.83834e+06	2.31919e+06	2.386e+06	4.73011e+06	9.38751e+06	2.60237e+06	3.96496e+06	747421	443928	3.5921e+06	7.5636e+06
Skp1	Q9WTX5	S-phase kinase-associated protein 1 OS=Mus musculus OX=10090 GN=Skp1 PE=1 SV=3	421343	698208	683653	1.01251e+06	1.08607e+06	363065	593657	10563.3	133047	625121	962244	10563.3	749827	601735	10563.3	787081	1.15223e+06
Slc1a2	P43006	Excitatory amino acid transporter 2 OS=Mus musculus OX=10090 GN=Slc1a2 PE=1 SV=1	397624	10563.3	10563.3	6.75573e+06	10563.3	10563.3	1.59759e+06	10563.3	10563.3	2.24557e+06	10563.3	10563.3	10563.3	10563.3	10563.3	10563.3	10563.3
Slc25a12	Q8BH59	Calcium-binding mitochondrial carrier protein Aralar1 OS=Mus musculus OX=10090 GN=Slc25a12 PE=1 SV=1	10563.3	10563.3	10563.3	1.35066e+06	317220	10563.3	10563.3	1.09681e+06	390653	10563.3	490532	679259	10563.3	10563.3	10563.3	10563.3	10563.3
Slc25a3	Q8VEM8	Phosphate carrier protein, mitochondrial OS=Mus musculus OX=10090 GN=Slc25a3 PE=1 SV=1	10563.3	10563.3	10563.3	4.20298e+06	10563.3	10563.3	1.2042e+06	495656	378814	1.24848e+06	483647	10563.3	10563.3	37089.1	59840.4	10563.3	87182.8
Slc25a4	P48962	ADP/ATP translocase 1 OS=Mus musculus OX=10090 GN=Slc25a4 PE=1 SV=4	298439	233816	1.51287e+06	2.80945e+07	394769	3.76835e+06	8.3295e+06	278453	1.8202e+06	9.86575e+06	1.83866e+06	992155	10563.3	10563.3	10563.3	10563.3	10563.3
Slc25a5	P51881	ADP/ATP translocase 2 OS=Mus musculus OX=10090 GN=Slc25a5 PE=1 SV=3	10563.3	92702.5	317157	2.22251e+06	10563.3	138340	10563.3	10563.3	460113	858132	849320	10563.3	759545	2.20648e+06	4.2763e+06	1.47894e+06	10563.3
Slc38a3	Q9DCP2	Sodium-coupled neutral amino acid transporter 3 OS=Mus musculus OX=10090 GN=Slc38a3 PE=1 SV=1	10563.3	10563.3	10563.3	10563.3	10563.3	10563.3	10563.3	10563.3	10563.3	10563.3	10563.3	10563.3	314503	10563.3	10563.3	305050	10563.3
Slc4a1	P04919	Band 3 anion transport protein OS=Mus musculus OX=10090 GN=Slc4a1 PE=1 SV=1	10563.3	929742	2.40756e+06	10563.3	5.65602e+06	308844	149592	731037	1.08429e+06	927511	2.55981e+06	1.75318e+06	1.68256e+06	2.15493e+06	10563.3	4.33617e+06	1.91188e+06
Slit3	Q9WVB4	Slit homolog 3 protein OS=Mus musculus OX=10090 GN=Slit3 PE=2 SV=2	935023	374893	516190	516968	10563.3	10563.3	570812	282117	10563.3	10563.3	402766	10563.3	10563.3	10563.3	10563.3	10563.3	10563.3
Slpi	P97430	Antileukoproteinase OS=Mus musculus OX=10090 GN=Slpi PE=1 SV=1	1.52062e+08	3.13259e+08	1.69298e+08	6.4607e+07	4.66913e+07	6.07963e+07	1.52339e+08	2.97516e+07	6.34586e+07	1.11708e+08	1.05631e+07	2.88603e+07	3.34819e+07	731082	1.73371e+07	2.57521e+07	7.40484e+07
Snap25	P60879	Synaptosomal-associated protein 25 OS=Mus musculus OX=10090 GN=Snap25 PE=1 SV=1	10563.3	10563.3	10563.3	1.13897e+06	10563.3	10563.3	10563.3	10563.3	10563.3	350367	10563.3	10563.3	10563.3	10563.3	10563.3	10563.3	10563.3
Snapc1	Q8K0S9	snRNA-activating protein complex subunit 1 OS=Mus musculus OX=10090 GN=Snapc1 PE=2 SV=1	10563.3	10563.3	10563.3	10563.3	10563.3	10563.3	10563.3	10563.3	10563.3	10563.3	10563.3	10563.3	733214	563580	888492	1.17835e+06	511194
Snca	O55042	Alpha-synuclein OS=Mus musculus OX=10090 GN=Snca PE=1 SV=2	3.67469e+06	7.54689e+06	4.62422e+06	4.57147e+06	1.16374e+07	1.29279e+06	2.10509e+06	240762	10563.3	1.94113e+06	4.33553e+06	10563.3	5.80595e+06	1.00995e+06	701925	4.22007e+06	2.06147e+06
Snd1	Q78PY7	Staphylococcal nuclease domain-containing protein 1 OS=Mus musculus OX=10090 GN=Snd1 PE=1 SV=1	904101	2.59414e+06	2.50526e+06	2.10743e+06	10563.3	317706	2.29446e+06	10563.3	448566	554869	2.48708e+06	10563.3	1.32756e+07	1.06725e+07	8.32849e+06	9.93661e+06	1.07074e+07
Snx1	Q9WV80	Sorting nexin-1 OS=Mus musculus OX=10090 GN=Snx1 PE=1 SV=1	146865	862407	519023	749918	397513	199217	398911	204914	539595	641780	957989	10563.3	375694	10563.3	10563.3	167895	864954
Snx15	Q91WE1	Sorting nexin-15 OS=Mus musculus OX=10090 GN=Snx15 PE=1 SV=1	10563.3	10563.3	10563.3	10563.3	628160	10563.3	10563.3	10563.3	10563.3	10563.3	10563.3	10563.3	10563.3	10563.3	10563.3	10563.3	10563.3
Sod1	P08228	Superoxide dismutase [Cu-Zn] OS=Mus musculus OX=10090 GN=Sod1 PE=1 SV=2	10563.3	10563.3	10563.3	4.19003e+06	10563.3	331364	1.22858e+06	10563.3	10563.3	1.1277e+06	10563.3	10563.3	10563.3	10563.3	822288	10563.3	10563.3
Sod3	O09164	Extracellular superoxide dismutase [Cu-Zn] OS=Mus musculus OX=10090 GN=Sod3 PE=1 SV=1	2.76487e+07	1.6481e+07	1.02771e+07	1.11638e+07	8.38636e+06	1.31013e+07	1.5701e+06	6.10098e+06	4.24262e+06	6.46241e+06	4.46782e+06	6.10654e+06	5.06749e+06	8.32971e+06	7.999e+06	4.50214e+06	4.35735e+06
Sord	Q64442	Sorbitol dehydrogenase OS=Mus musculus OX=10090 GN=Sord PE=1 SV=3	732955	919923	385530	983406	975213	736468	742611	5.99855e+06	3.05654e+06	1.88723e+06	5.56977e+06	774548	1.71717e+07	9.85916e+06	1.70767e+06	1.7895e+07	2.54178e+07
Sort1	Q6PHU5	Sortilin OS=Mus musculus OX=10090 GN=Sort1 PE=1 SV=1	1.93482e+08	2.52868e+08	1.70715e+08	1.19703e+08	1.63683e+08	1.5654e+08	1.58409e+08	8.83345e+07	2.15029e+08	1.0095e+08	1.0635e+08	1.29985e+08	4.01235e+06	170380	902672	2.27119e+06	6.80262e+06
Sparc	P07214	SPARC OS=Mus musculus OX=10090 GN=Sparc PE=1 SV=1	8.84156e+06	4.33382e+06	4.94134e+06	8.71917e+06	8.92853e+06	7.99269e+06	5.69282e+06	2.47411e+07	4.60454e+06	7.62577e+06	6.1732e+06	2.78098e+06	10563.3	10563.3	10563.3	10563.3	10563.3
Sparcl1	P70663	SPARC-like protein 1 OS=Mus musculus OX=10090 GN=Sparcl1 PE=1 SV=3	3.817e+07	2.67441e+07	1.88514e+07	2.0848e+07	1.95186e+07	1.9504e+07	1.31145e+07	6.54507e+06	2.46708e+07	3.39668e+07	1.03612e+07	7.18589e+06	1.1452e+07	9.24325e+06	3.48325e+06	7.42403e+06	1.02255e+07
Spast	Q9QYY8	Spastin OS=Mus musculus OX=10090 GN=Spast PE=1 SV=3	10563.3	10563.3	10563.3	10563.3	10563.3	10563.3	10563.3	10563.3	10563.3	10563.3	10563.3	10563.3	3.2467e+06	2.18048e+06	2.50985e+06	2.65686e+06	2.84402e+06
Spon2	Q8BMS2	Spondin-2 OS=Mus musculus OX=10090 GN=Spon2 PE=2 SV=2	10563.3	10563.3	10563.3	255217	10563.3	286449	10563.3	10563.3	10563.3	10563.3	10563.3	10563.3	10563.3	10563.3	10563.3	10563.3	10563.3
Spp2	Q8K1I3	Secreted phosphoprotein 24 OS=Mus musculus OX=10090 GN=Spp2 PE=1 SV=2	9.28872e+08	1.00164e+09	1.14823e+09	9.27496e+08	8.0989e+08	6.87194e+08	1.49225e+09	8.00923e+08	3.57433e+08	8.40112e+08	6.6516e+08	8.33359e+08	3.3454e+08	2.03009e+08	1.70455e+08	2.66967e+08	2.7859e+08
Spr	Q64105	Sepiapterin reductase OS=Mus musculus OX=10090 GN=Spr PE=1 SV=1	484598	739351	451399	879945	955064	510836	443973	815286	10563.3	618492	888282	350223	836854	10563.3	4.02877e+06	1.2099e+06	1.08075e+07
Spred3	Q6P6N5	Sprouty-related, EVH1 domain-containing protein 3 OS=Mus musculus OX=10090 GN=Spred3 PE=1 SV=1	10563.3	1.80921e+06	2.35733e+06	1.94453e+06	596560	3.03843e+06	1.47895e+06	469568	10563.3	3.63648e+06	6.00239e+06	4.90413e+06	10563.3	10563.3	10563.3	10563.3	10563.3
Spta1	P08032	Spectrin alpha chain, erythrocytic 1 OS=Mus musculus OX=10090 GN=Spta1 PE=1 SV=3	1.72387e+06	2.23494e+06	9.24535e+06	2.66881e+06	1.7758e+07	1.96634e+06	2.99414e+06	922543	918897	2.03288e+06	4.50985e+06	3.02153e+06	2.2158e+06	1.2838e+06	1.83214e+06	3.72344e+06	251756
Sptan1	P16546	Spectrin alpha chain, non-erythrocytic 1 OS=Mus musculus OX=10090 GN=Sptan1 PE=1 SV=4	1.17206e+08	1.02046e+08	1.43884e+08	1.43339e+08	1.0184e+08	1.0213e+08	3.0391e+08	7.76438e+07	4.26005e+08	1.23559e+08	1.85699e+08	1.50497e+08	7.70059e+06	3.69465e+06	3.10222e+06	7.82813e+06	1.67162e+07
Sptb	P15508	Spectrin beta chain, erythrocytic OS=Mus musculus OX=10090 GN=Sptb PE=1 SV=4	3.60184e+06	5.39912e+06	8.86121e+06	4.06245e+06	5.28649e+07	2.08279e+06	1.13386e+07	1.30778e+06	3.14159e+06	4.16144e+06	2.82076e+06	4.08637e+06	2.80907e+06	2.66621e+06	1.67217e+06	3.98708e+06	1.31981e+06
Sptbn1	Q62261	Spectrin beta chain, non-erythrocytic 1 OS=Mus musculus OX=10090 GN=Sptbn1 PE=1 SV=2	9.07748e+06	3.43033e+07	3.52771e+07	2.72462e+07	1.7545e+07	1.79216e+07	3.20156e+07	1.22279e+07	3.3163e+07	2.17039e+07	3.05887e+07	2.01928e+07	822577	399400	10563.3	2.44211e+06	6.93032e+06
Src	P05480	Neuronal proto-oncogene tyrosine-protein kinase Src OS=Mus musculus OX=10090 GN=Src PE=1 SV=4	463608	1.84425e+06	1.86262e+06	1.16524e+06	404795	728216	510589	10563.3	392570	344384	616920	245507	10563.3	10563.3	10563.3	10563.3	10563.3
Sri	Q6P069	Sorcin OS=Mus musculus OX=10090 GN=Sri PE=1 SV=1	1.128e+07	9.80154e+06	1.31507e+07	1.08141e+07	2.04815e+07	9.22005e+06	8.25574e+06	1.52274e+07	1.63349e+07	1.30086e+07	1.48079e+07	9.21117e+06	1.50218e+07	1.64905e+07	9.4869e+06	1.96456e+07	2.00307e+07
Srm	Q64674	Spermidine synthase OS=Mus musculus OX=10090 GN=Srm PE=1 SV=1	377950	1.38176e+06	939591	1.0344e+06	1.01226e+06	445646	480362	229996	483411	10563.3	812249	10563.3	10563.3	10563.3	10563.3	10563.3	10563.3
St13	Q99L47	Hsc70-interacting protein OS=Mus musculus OX=10090 GN=St13 PE=1 SV=1	1.57244e+06	2.1408e+06	873533	762705	1.52958e+06	10563.3	497906	1.34676e+06	10563.3	774964	952395	10563.3	2.90778e+06	1.73878e+06	1.0746e+06	2.88376e+06	6.79788e+06
St3gal1	P54751	CMP-N-acetylneuraminate-beta-galactosamide-alpha-2,3-sialyltransferase 1 OS=Mus musculus OX=10090 GN=St3gal1 PE=1 SV=1	10563.3	10563.3	10563.3	133145	10563.3	10563.3	271826	10563.3	228256	332460	164446	214653	10563.3	10563.3	10563.3	10563.3	10563.3
St3gal6	Q8VIB3	Type 2 lactosamine alpha-2,3-sialyltransferase OS=Mus musculus OX=10090 GN=St3gal6 PE=2 SV=3	10563.3	241962	10563.3	10563.3	10563.3	226401	319743	10563.3	388513	10563.3	10563.3	10563.3	10563.3	10563.3	10563.3	10563.3	10563.3
Stab1	Q8R4Y4	Stabilin-1 OS=Mus musculus OX=10090 GN=Stab1 PE=1 SV=1	10563.3	375500	10563.3	723660	10563.3	725418	10563.3	10563.3	10563.3	10563.3	10563.3	10563.3	10563.3	10563.3	10563.3	10563.3	969324
Stat3	P42227	Signal transducer and activator of transcription 3 OS=Mus musculus OX=10090 GN=Stat3 PE=1 SV=2	10563.3	10563.3	10563.3	10563.3	10563.3	10563.3	10563.3	10563.3	10563.3	10563.3	10563.3	10563.3	718633	364309	536842	531842	655781
Stc2	O88452	Stanniocalcin-2 OS=Mus musculus OX=10090 GN=Stc2 PE=1 SV=1	10563.3	10563.3	10563.3	10563.3	10563.3	10563.3	10563.3	10563.3	10563.3	10563.3	10563.3	10563.3	10563.3	84386.2	10563.3	10563.3	197229
Stip1	Q60864	Stress-induced-phosphoprotein 1 OS=Mus musculus OX=10090 GN=Stip1 PE=1 SV=1	1.57609e+07	1.53037e+07	1.74846e+07	1.81486e+07	1.58962e+07	1.11553e+07	1.21335e+07	1.38734e+07	1.87474e+07	1.39982e+07	1.30295e+07	1.14135e+07	9.70335e+06	8.51031e+06	3.4049e+06	9.25098e+06	1.34742e+07
Stk26	Q99JT2	Serine/threonine-protein kinase 26 OS=Mus musculus OX=10090 GN=Stk26 PE=1 SV=1	563282	1.36453e+06	1.25579e+06	1.1835e+06	674972	436812	748116	365669	597765	807772	1.41794e+06	10563.3	186388	10563.3	10563.3	10563.3	524113
Stk4	Q9JI11	Serine/threonine-protein kinase 4 OS=Mus musculus OX=10090 GN=Stk4 PE=1 SV=1	10563.3	398317	504463	291416	10563.3	10563.3	10563.3	10563.3	10563.3	10563.3	465475	10563.3	10563.3	10563.3	10563.3	10563.3	10563.3
Stmn4	P63042	Stathmin-4 OS=Mus musculus OX=10090 GN=Stmn4 PE=2 SV=1	10563.3	10563.3	10563.3	551951	10563.3	534680	10563.3	10563.3	10563.3	10563.3	10563.3	10563.3	10563.3	10563.3	10563.3	10563.3	10563.3
Stom	P54116	Stomatin OS=Mus musculus OX=10090 GN=Stom PE=1 SV=3	10563.3	10563.3	685715	830399	1.86964e+06	1.62459e+06	10563.3	10563.3	902196	10563.3	10563.3	10563.3	536073	10563.3	10563.3	10563.3	789921
Strap	Q9Z1Z2	Serine-threonine kinase receptor-associated protein OS=Mus musculus OX=10090 GN=Strap PE=1 SV=2	10563.3	10563.3	10563.3	10563.3	10563.3	10563.3	10563.3	10563.3	10563.3	10563.3	10563.3	10563.3	10563.3	10563.3	10563.3	10563.3	256779
Stx1a	O35526	Syntaxin-1A OS=Mus musculus OX=10090 GN=Stx1a PE=1 SV=3	3.20108e+06	3.34357e+06	5.43242e+06	6.12218e+06	4.12191e+06	4.41899e+06	4.34e+06	7.46495e+06	2.85085e+06	4.61688e+06	5.00753e+06	4.50738e+06	10563.3	10563.3	10563.3	10563.3	10563.3
Stx1b	P61264	Syntaxin-1B OS=Mus musculus OX=10090 GN=Stx1b PE=1 SV=1	10563.3	10563.3	10563.3	711572	10563.3	10563.3	10563.3	10563.3	10563.3	10563.3	10563.3	10563.3	10563.3	10563.3	10563.3	10563.3	10563.3
Stxbp1	O08599	Syntaxin-binding protein 1 OS=Mus musculus OX=10090 GN=Stxbp1 PE=1 SV=2	285067	500778	10563.3	9.548e+06	10563.3	364190	1.25163e+06	10563.3	379061	1.3518e+06	10563.3	10563.3	10563.3	10563.3	10563.3	10563.3	10563.3
Suclg2	Q9Z2I8	Succinate--CoA ligase [GDP-forming] subunit beta, mitochondrial OS=Mus musculus OX=10090 GN=Suclg2 PE=1 SV=3	10563.3	10563.3	10563.3	10563.3	10563.3	10563.3	10563.3	10563.3	10563.3	10563.3	10563.3	10563.3	201210	214544	383689	187103	450685
Sult1a1	P52840	Sulfotransferase 1A1 OS=Mus musculus OX=10090 GN=Sult1a1 PE=1 SV=1	10563.3	10563.3	10563.3	10563.3	10563.3	10563.3	10563.3	10563.3	10563.3	10563.3	10563.3	10563.3	10563.3	10563.3	3.26437e+06	1.96099e+06	1.36296e+06
Sult1e1	P49891	Sulfotransferase 1E1 OS=Mus musculus OX=10090 GN=Sult1e1 PE=1 SV=2	10563.3	10563.3	10563.3	10563.3	10563.3	10563.3	10563.3	10563.3	10563.3	10563.3	10563.3	10563.3	10563.3	10563.3	1.11312e+06	10563.3	10563.3
Suox	Q8R086	Sulfite oxidase, mitochondrial OS=Mus musculus OX=10090 GN=Suox PE=1 SV=2	10563.3	309245	10563.3	10563.3	272419	250259	10563.3	517186	10563.3	871238	778404	10563.3	2.76226e+06	7.36177e+06	3.36655e+06	6.00609e+06	8.46454e+06
Sv2b	Q8BG39	Synaptic vesicle glycoprotein 2B OS=Mus musculus OX=10090 GN=Sv2b PE=1 SV=1	10563.3	10563.3	283672	283269	10563.3	10563.3	10563.3	10563.3	10563.3	212299	10563.3	179396	10563.3	10563.3	10563.3	10563.3	10563.3
Svep1	A2AVA0	Sushi, von Willebrand factor type A, EGF and pentraxin domain-containing protein 1 OS=Mus musculus OX=10090 GN=Svep1 PE=1 SV=1	3.75348e+06	2.45038e+06	3.30934e+06	4.30818e+06	3.90082e+06	4.50278e+06	1.91203e+06	1.58506e+06	1.84992e+06	6.41269e+06	802090	615383	10563.3	10563.3	10563.3	10563.3	10563.3
Syap1	Q9D5V6	Synapse-associated protein 1 OS=Mus musculus OX=10090 GN=Syap1 PE=1 SV=1	10563.3	10563.3	10563.3	10563.3	10563.3	10563.3	10563.3	10563.3	10563.3	10563.3	10563.3	10563.3	10563.3	10563.3	10563.3	197197	652373
Sycn	Q8VCK7	Syncollin OS=Mus musculus OX=10090 GN=Sycn PE=1 SV=3	209219	10563.3	228217	10563.3	10563.3	10563.3	1.06622e+06	10563.3	1.08755e+06	688017	641573	812476	995256	624122	346224	824315	529032
Syk	P48025	Tyrosine-protein kinase SYK OS=Mus musculus OX=10090 GN=Syk PE=1 SV=2	1.30749e+06	3.3273e+06	2.92288e+06	1.7298e+06	316491	523792	988712	10563.3	702352	10563.3	1.87396e+06	10563.3	3.01617e+06	2.00701e+06	1.914e+06	2.72808e+06	3.51781e+06
Syn1	O88935	Synapsin-1 OS=Mus musculus OX=10090 GN=Syn1 PE=1 SV=2	10563.3	10563.3	10563.3	2.59446e+06	10563.3	10563.3	692759	4.66651e+06	10563.3	10563.3	10563.3	10563.3	10563.3	10563.3	10563.3	10563.3	10563.3
Syncrip	Q7TMK9	Heterogeneous nuclear ribonucleoprotein Q OS=Mus musculus OX=10090 GN=Syncrip PE=1 SV=2	10563.3	178545	349903	266978	297497	10563.3	280043	310309	245342	421132	307368	10563.3	10563.3	10563.3	10563.3	10563.3	10563.3
Syp	Q62277	Synaptophysin OS=Mus musculus OX=10090 GN=Syp PE=1 SV=2	10563.3	10563.3	10563.3	1.5003e+06	10563.3	10563.3	10563.3	10563.3	10563.3	10563.3	10563.3	10563.3	10563.3	10563.3	10563.3	10563.3	10563.3
Syt1	P46096	Synaptotagmin-1 OS=Mus musculus OX=10090 GN=Syt1 PE=1 SV=1	10563.3	10563.3	10563.3	3.16162e+06	10563.3	183227	194804	10563.3	10563.3	624347	10563.3	10563.3	10563.3	10563.3	10563.3	10563.3	10563.3
Sytl4	Q9R0Q1	Synaptotagmin-like protein 4 OS=Mus musculus OX=10090 GN=Sytl4 PE=1 SV=1	10563.3	1.32822e+06	1.16688e+06	442345	554726	349484	871116	10563.3	692578	421352	490633	223275	534391	10563.3	152737	278234	911591
Tacc1	Q6Y685	Transforming acidic coiled-coil-containing protein 1 OS=Mus musculus OX=10090 GN=Tacc1 PE=1 SV=1	10563.3	10563.3	10563.3	232490	377585	10563.3	172525	10563.3	10563.3	10563.3	778385	10563.3	10563.3	10563.3	10563.3	10563.3	10563.3
Tagln2	Q9WVA4	Transgelin-2 OS=Mus musculus OX=10090 GN=Tagln2 PE=1 SV=4	1.69024e+06	3.39463e+06	2.93404e+06	5.7377e+06	2.86367e+06	1.99431e+06	1.20392e+06	313077	2.54698e+06	1.13289e+06	5.09732e+06	10563.3	10563.3	10563.3	1.09974e+06	542712	545878
Taldo1	Q93092	Transaldolase OS=Mus musculus OX=10090 GN=Taldo1 PE=1 SV=2	10563.3	10563.3	671075	221453	10563.3	620688	10563.3	10563.3	10563.3	257120	232446	10563.3	10563.3	10563.3	10563.3	10563.3	10563.3
Taok3	Q8BYC6	Serine/threonine-protein kinase TAO3 OS=Mus musculus OX=10090 GN=Taok3 PE=1 SV=2	10563.3	369018	528579	10563.3	10563.3	10563.3	10563.3	10563.3	10563.3	10563.3	10563.3	10563.3	10563.3	10563.3	10563.3	10563.3	10563.3
Tbc1d2b	Q3U0J8	TBC1 domain family member 2B OS=Mus musculus OX=10090 GN=Tbc1d2b PE=1 SV=2	10563.3	10563.3	10563.3	10563.3	10563.3	10563.3	10563.3	10563.3	10563.3	10563.3	10563.3	10563.3	6.13867e+06	2.84203e+06	3.0783e+06	5.4504e+06	6.38558e+06
Tcap	O70548	Telethonin OS=Mus musculus OX=10090 GN=Tcap PE=1 SV=1	10563.3	10563.3	426030	391656	10563.3	1.75078e+06	10563.3	10563.3	10563.3	10563.3	10563.3	10563.3	10563.3	10563.3	10563.3	10563.3	10563.3
Tcn2	O88968	Transcobalamin-2 OS=Mus musculus OX=10090 GN=Tcn2 PE=1 SV=1	4.97403e+08	5.23029e+08	7.53626e+08	6.88662e+08	6.29654e+08	7.21981e+08	8.79151e+08	5.9614e+08	7.7198e+08	5.20177e+08	7.18591e+08	6.42019e+08	4.80928e+08	3.79615e+08	4.52926e+08	6.64797e+08	3.70263e+08
Tcp1	P11983	T-complex protein 1 subunit alpha OS=Mus musculus OX=10090 GN=Tcp1 PE=1 SV=3	2.17456e+06	7.84199e+06	1.01631e+07	7.40782e+06	1.70792e+07	1.21104e+06	4.67132e+06	1.52227e+06	3.11129e+06	5.43515e+06	6.11597e+06	317307	505601	10563.3	10563.3	448241	766687
Tdpoz2	Q717B2	TD and POZ domain-containing protein 2 OS=Mus musculus OX=10090 GN=Tdpoz2 PE=2 SV=2	10563.3	10563.3	10563.3	10563.3	10563.3	10563.3	10563.3	10563.3	10563.3	10563.3	10563.3	10563.3	710100	10563.3	10563.3	634152	1.00054e+06
Tdrd5	Q5VCS6	Tudor domain-containing protein 5 OS=Mus musculus OX=10090 GN=Tdrd5 PE=1 SV=3	1.21298e+06	1.70188e+06	1.51673e+06	1.17605e+06	1.01566e+06	2.84183e+06	3.46958e+06	10563.3	1.59695e+06	1.96907e+06	1.15254e+06	1.50409e+06	10563.3	10563.3	10563.3	10563.3	10563.3
Tep1	P97499	Telomerase protein component 1 OS=Mus musculus OX=10090 GN=Tep1 PE=1 SV=1	10563.3	10563.3	10563.3	10563.3	10563.3	10563.3	10563.3	10563.3	10563.3	10563.3	1.2928e+06	10563.3	10563.3	10563.3	10563.3	10563.3	10563.3
Tf	Q921I1	Serotransferrin OS=Mus musculus OX=10090 GN=Tf PE=1 SV=1	1.2071e+09	5.04329e+08	9.45246e+08	7.35767e+08	8.38957e+08	7.54181e+08	5.80885e+09	1.2186e+09	9.49539e+09	1.7802e+09	1.97591e+09	2.68904e+09	5.67809e+08	1.09428e+09	5.9339e+09	6.39986e+08	3.47982e+08
[truncated: 121 more rows]
